# Supplementary material
Source: MDPI journal article supplement (https://www.mdpi.com/2072-4292/8/10/810)
Supplement: s1 [file s1]

# Supplementary Materials: A Quantitative Comparison of Total Suspended Sediment Algorithms: A Case Study of the Last Decade for MODIS and Landsat-Based Sensors

Passang Dorji \* and Peter Fearn

## S1. Scatter Plot of MODIS TSS Models for CLASS-I Water

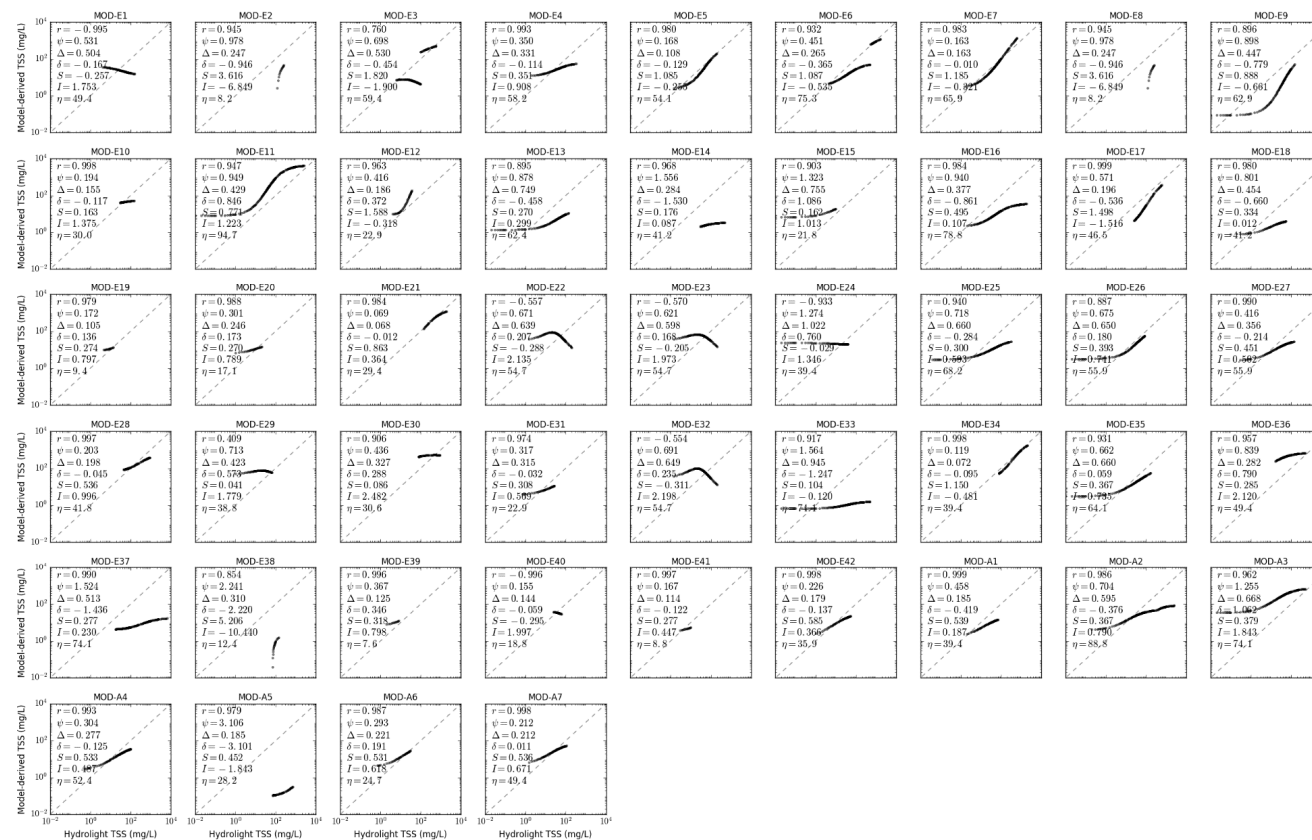

Figure S1.1. Scatter plot of MODIS TSS models in CLASS-I water for brown earth sediment,  $b_b/b$  ratio of 0.018, solar zenith angle of 30°.

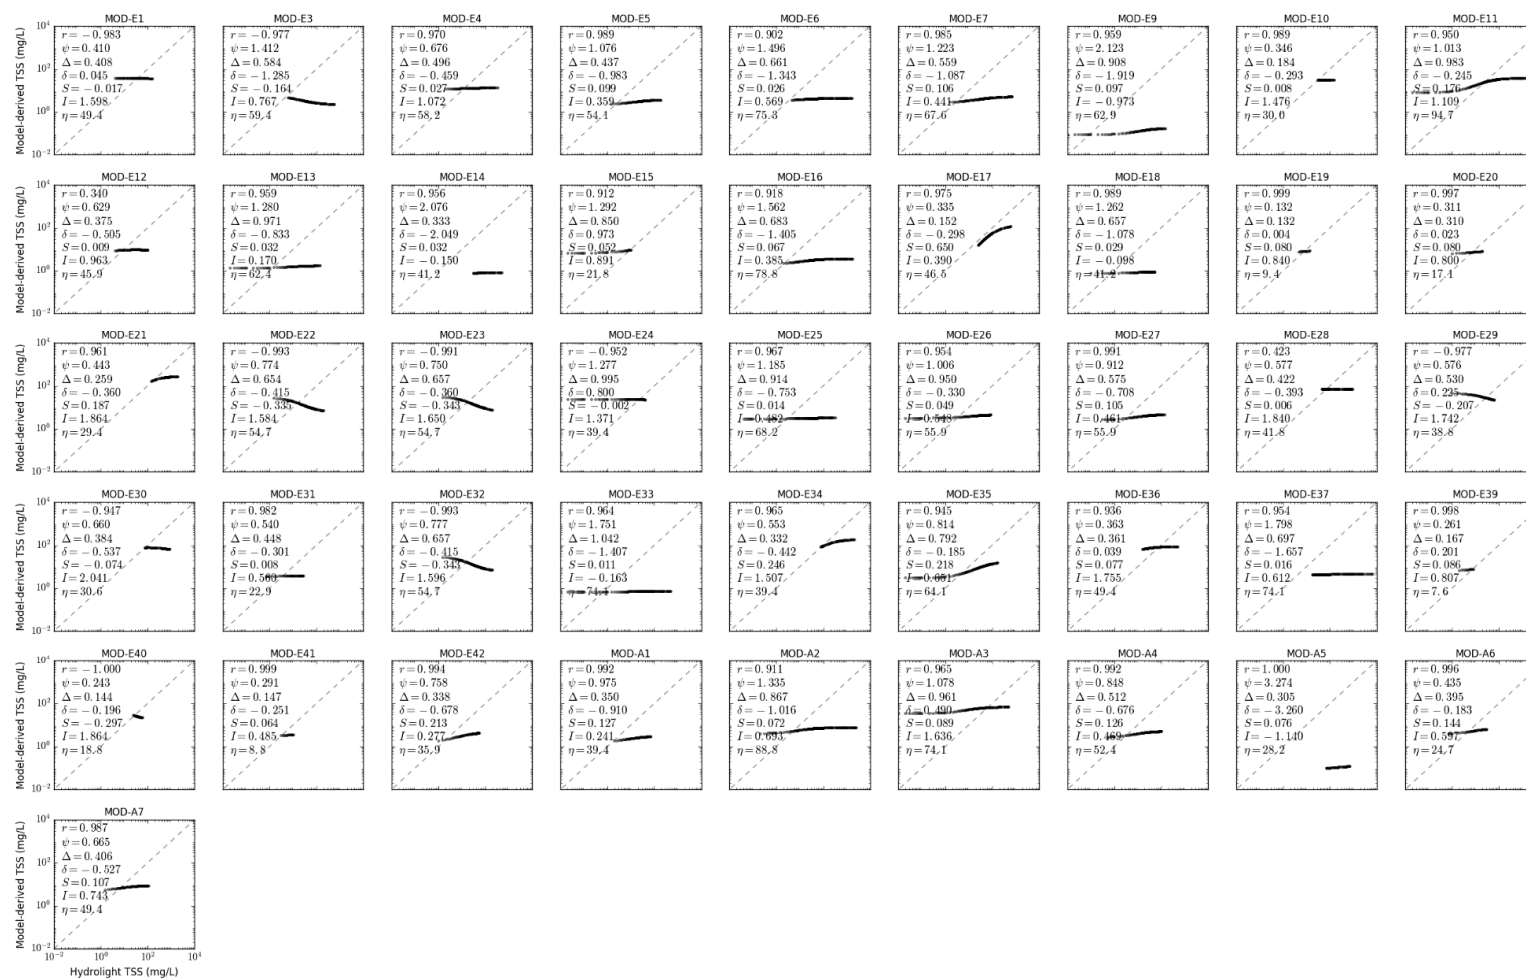

Figure S1.2. Scatter plot of MODIS TSS models in CLASS-I water for bukata sediment,  $b_b/b$  ratio of 0.018, solar zenith angle of  $30^\circ$ .

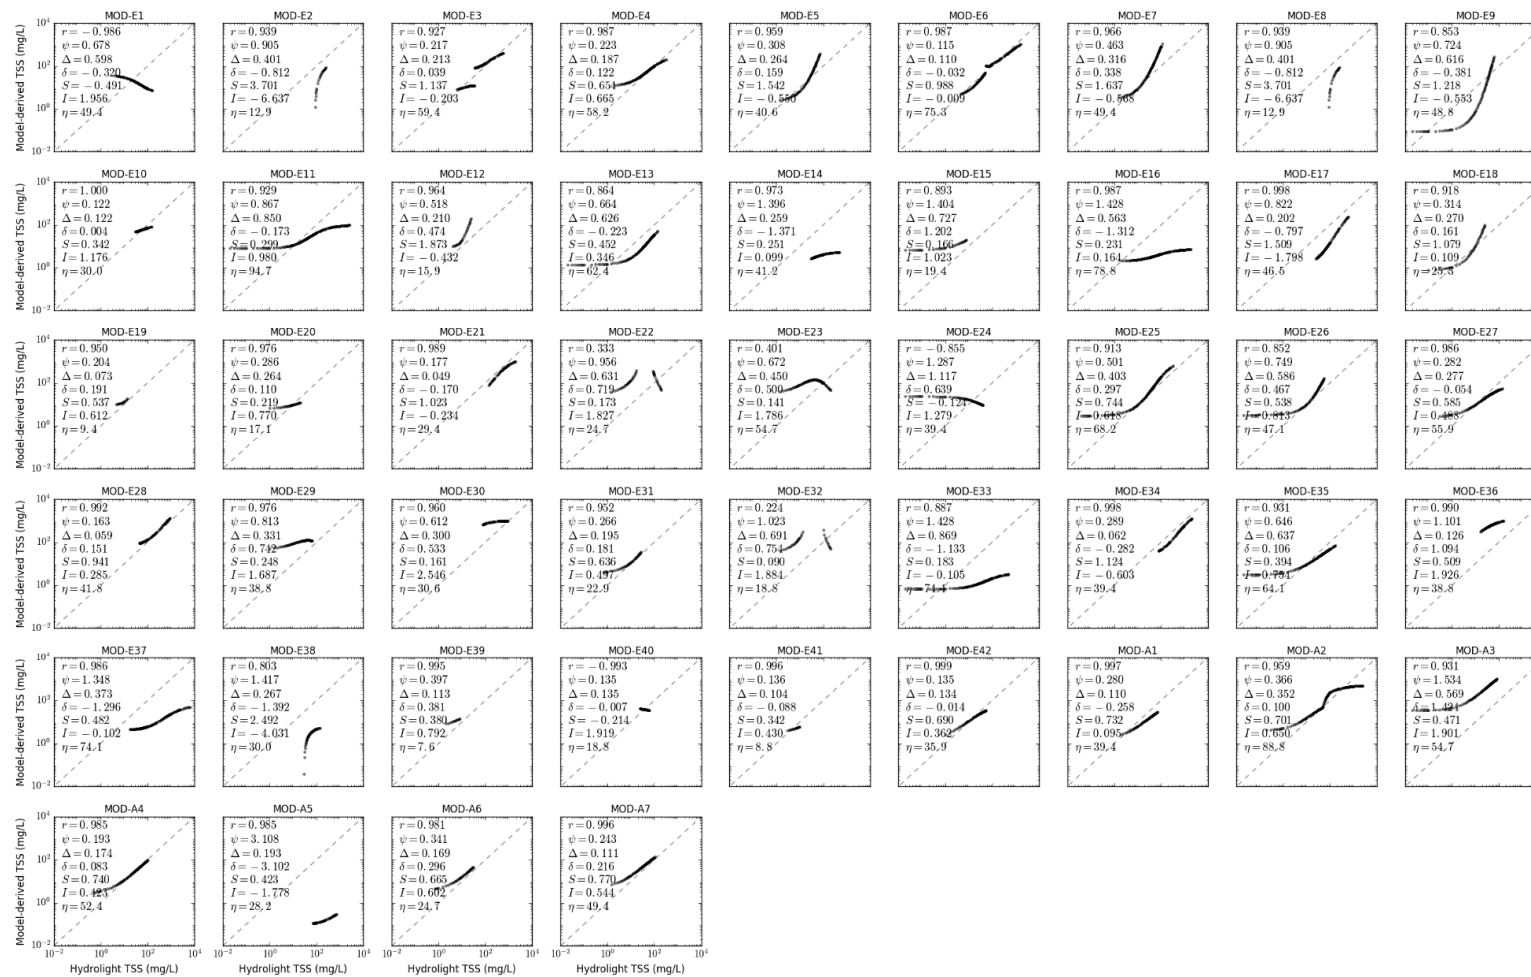

Figure S1.3. Scatter plot of MODIS TSS models in CLASS-I water for calcareous sand sediment,  $b_b/b$  ratio of 0.018, solar zenith angle of  $30^\circ$ .

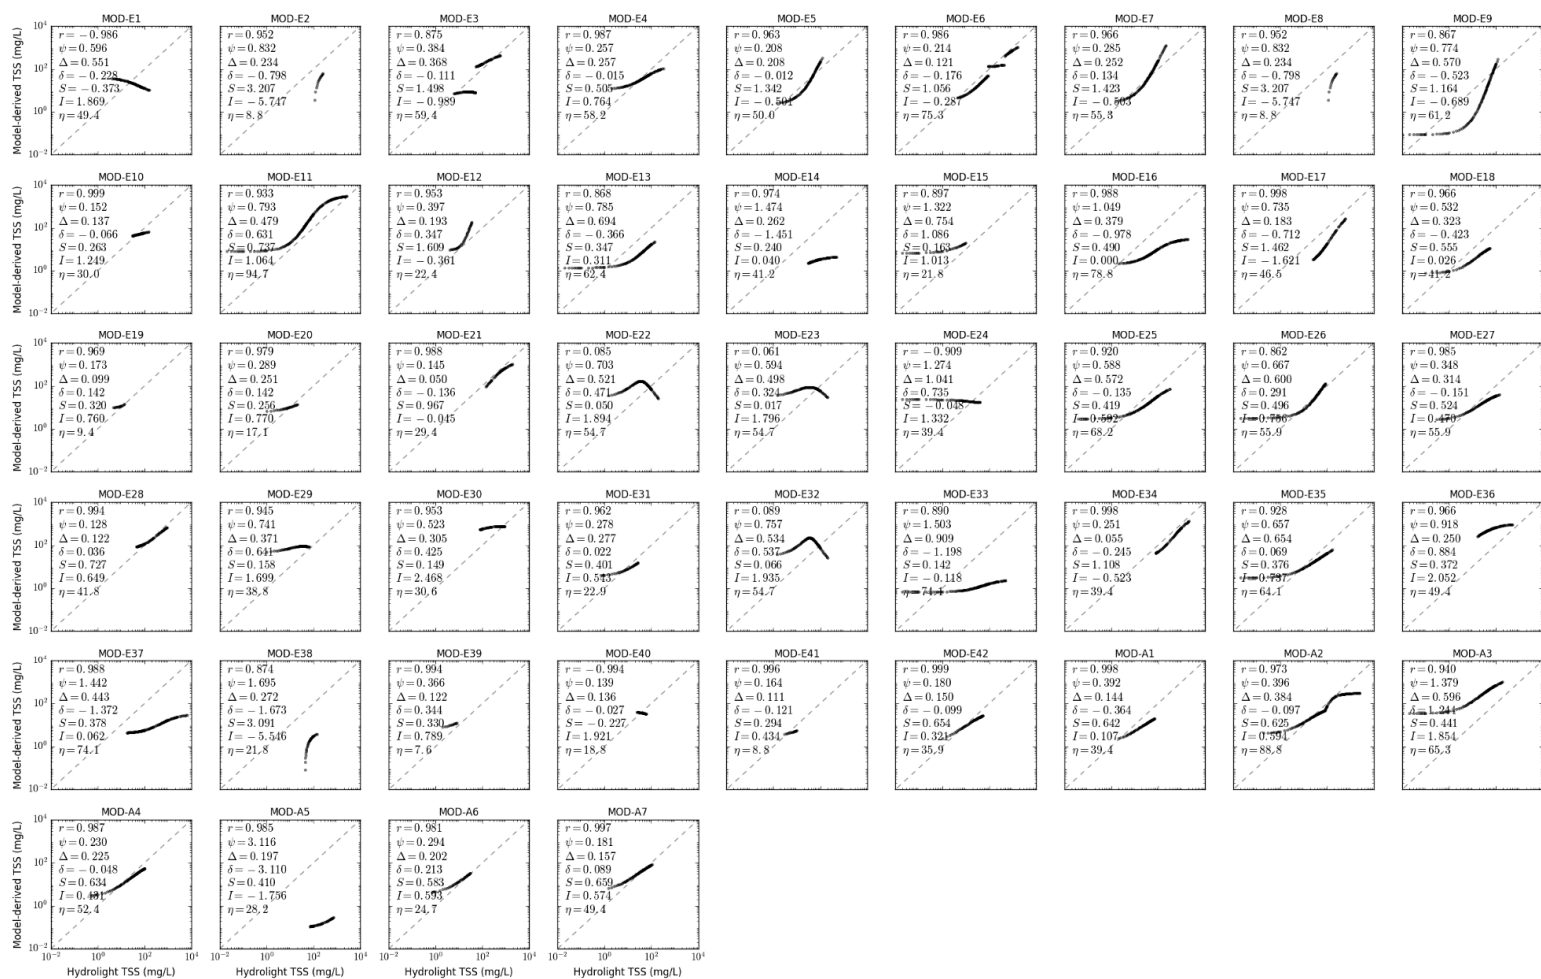

**Figure S1.4.** Scatter plot of MODIS TSS models in CLASS-I water for red clay sediment,  $b_b/b$  ratio of 0.018, solar zenith angle of 30°.



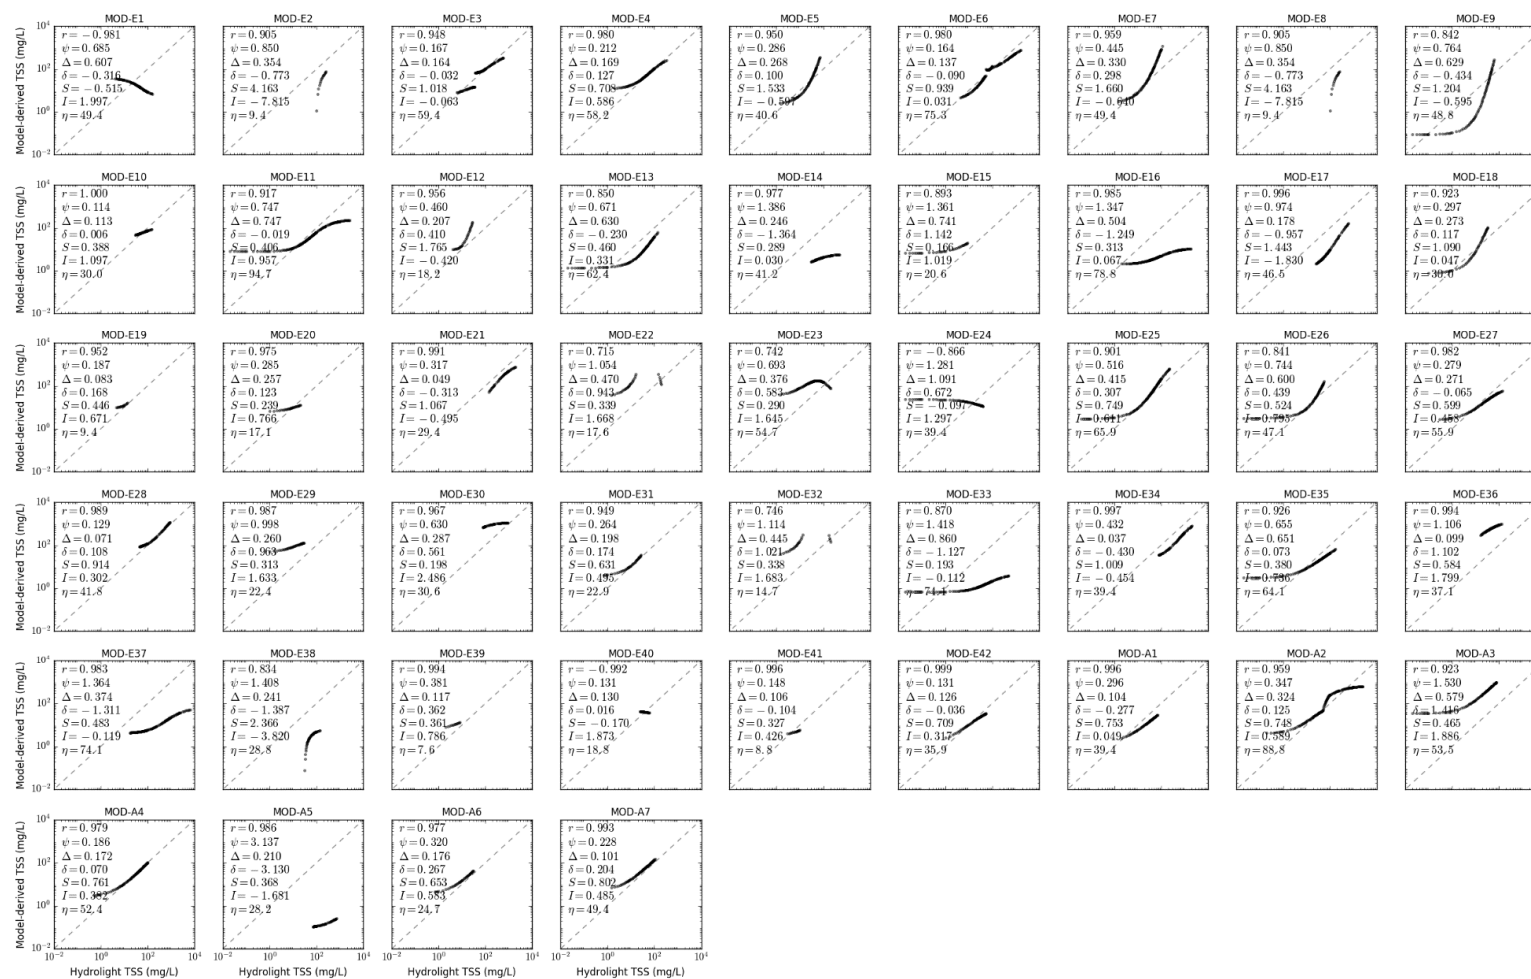

Figure S1.5. Scatter plot of MODIS TSS models in CLASS-I water for yellow clay sediment,  $b_b/b$  ratio of 0.018, solar zenith angle of 30°.

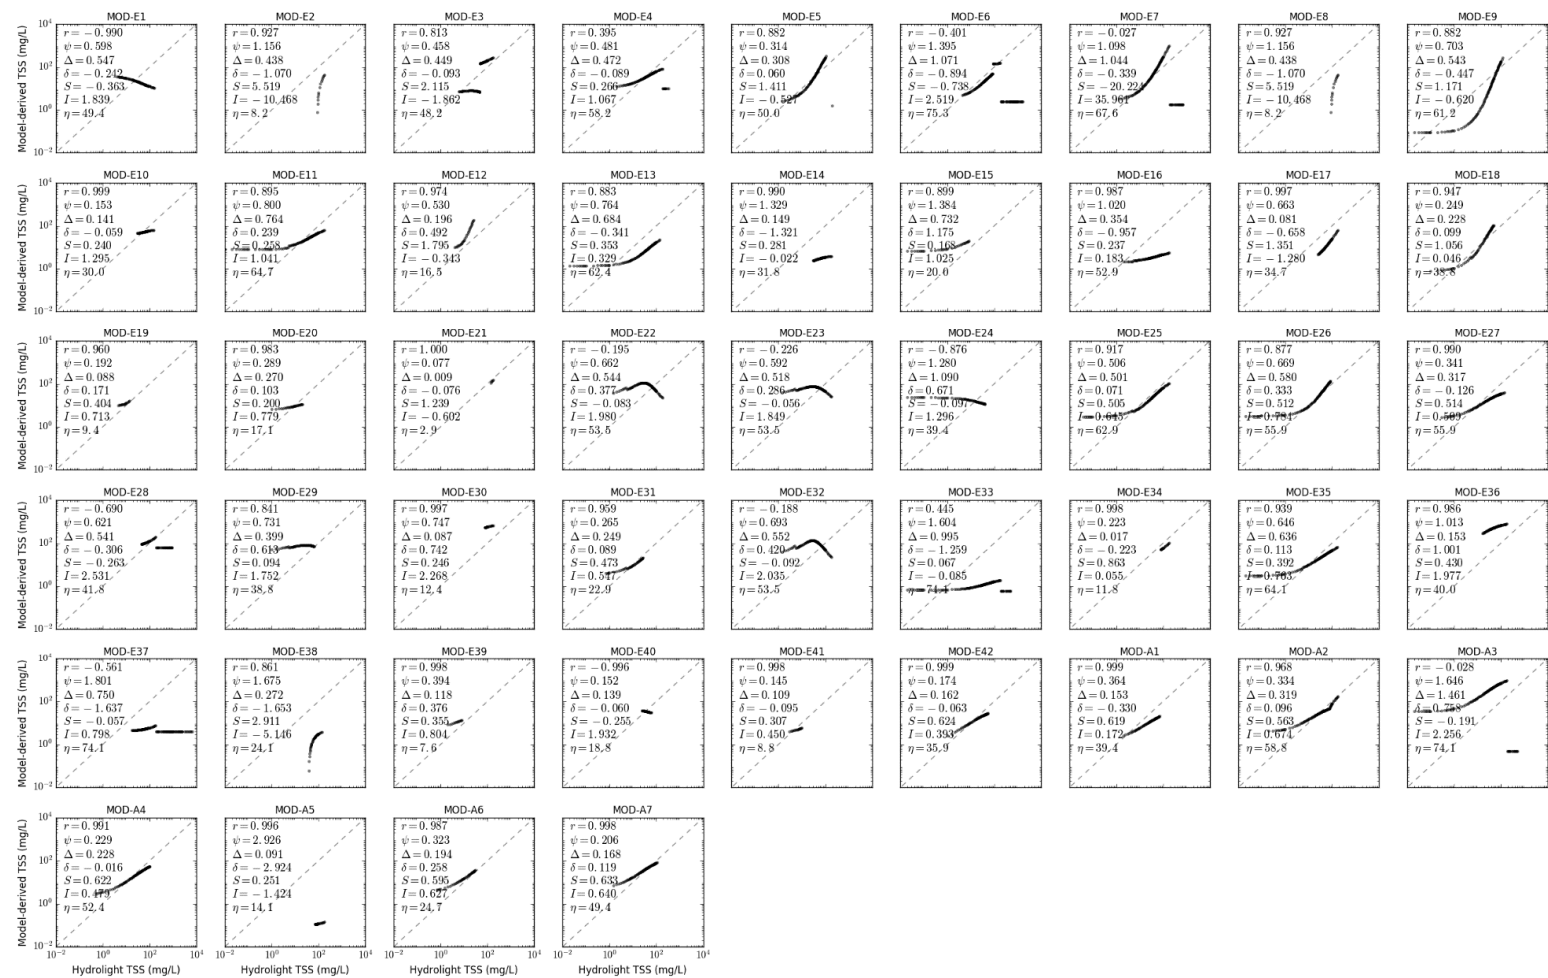

Figure S1.6. Scatter plot of MODIS TSS models in CLASS-I water for calcareous sand sediment,  $b_b/b$  ratio of 0.001, solar zenith angle of 30°.

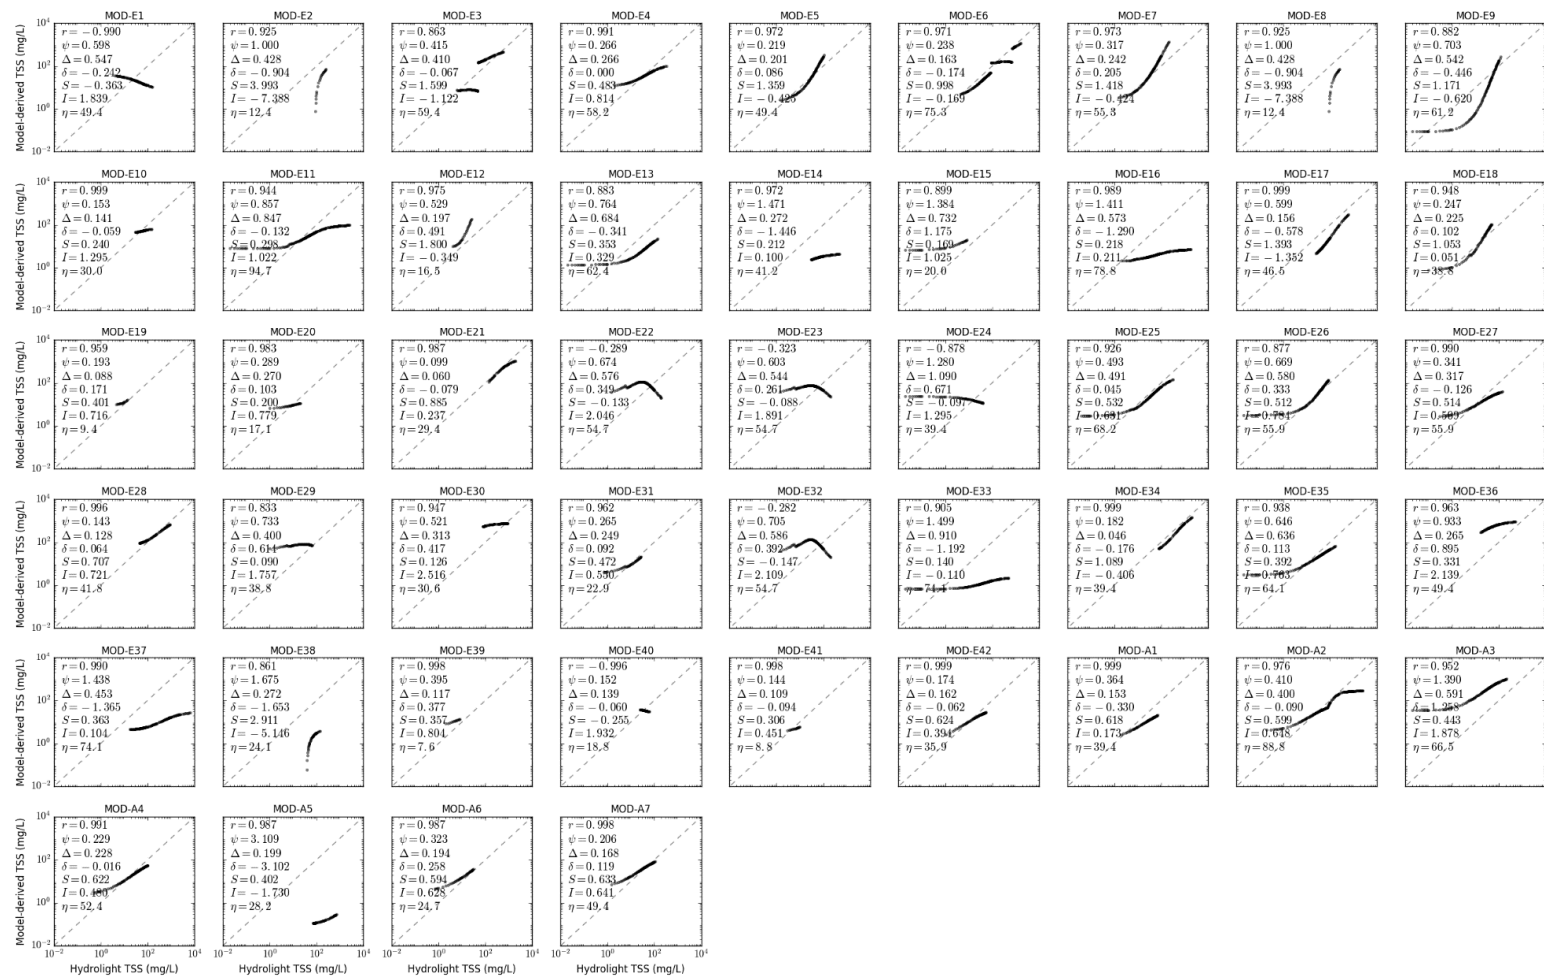

Figure S1.7. Scatter plot of MODIS TSS models in CLASS-I water for calcareous sand sediment,  $b_b/b$  ratio of 0.01, solar zenith angle of 30°.

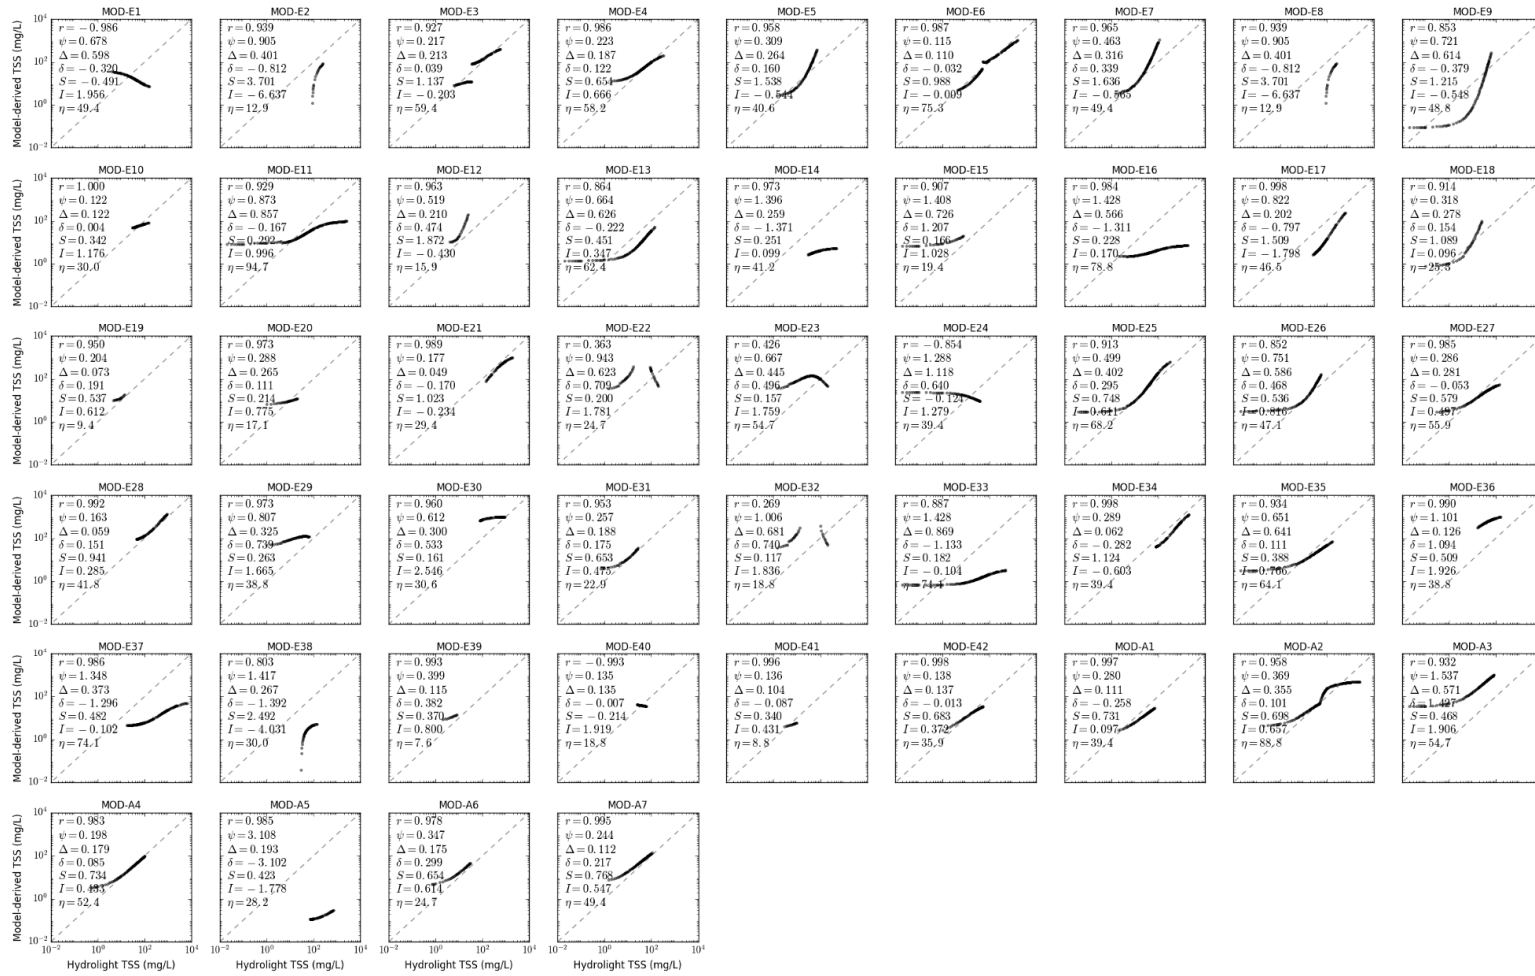

Figure S1.8. Scatter plot of MODIS TSS models in CLASS-I water for calcareous sand sediment,  $b_b/b$  ratio of 0.05, solar zenith angle of 30°.

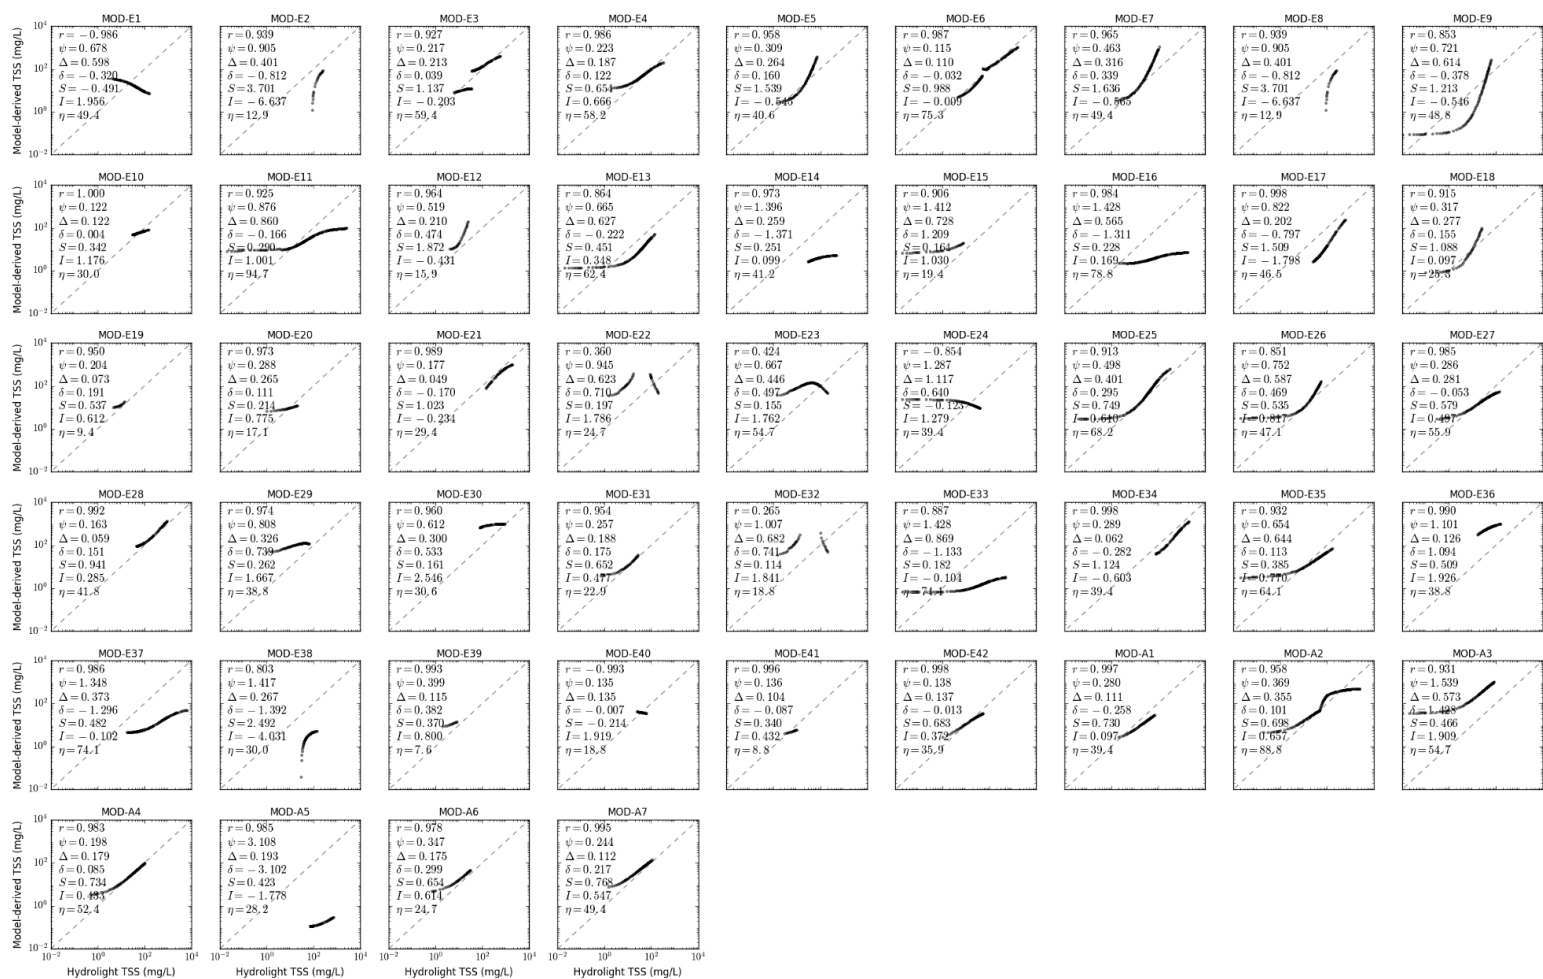

**Figure S1.9.** Scatter plot of MODIS TSS models in CLASS-I water for calcareous sand sediment,  $b_b/b$  ratio of 0.1, solar zenith angle of  $30^\circ$ .

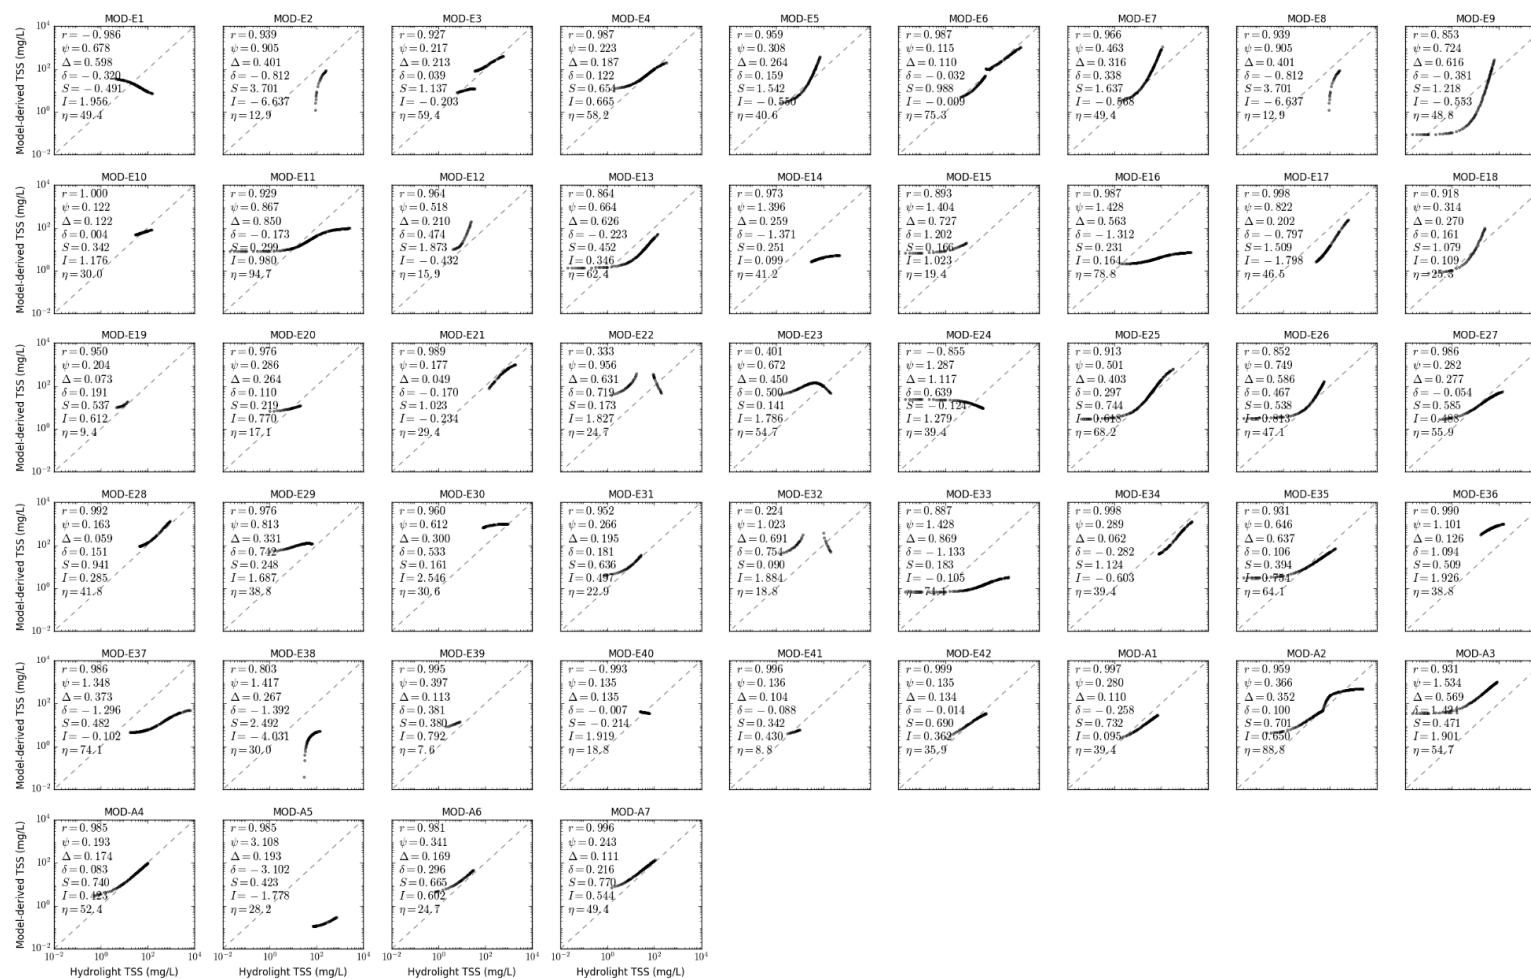

**Figure S1.10.** Scatter plot of MODIS TSS models in CLASS-I water for calcareous sand sediment,  $b_b/b$  ratio of 0.018, solar zenith angle of 15°.



**Figure S1.11.** Scatter plot of MODIS TSS models in CLASS-I water for calcareous sand sediment,  $b_b/b$  ratio of 0.018, solar zenith angle of 45°.



Figure S1.12. Scatter plot of MODIS TSS models in CLASS-I water for calcareous sand sediment,  $b_b/b$  ratio of 0.018, solar zenith angle of 60°.



## Supplementary Materials S2. Scatter Plot of MODIS TSS Models for CLASS-II Water

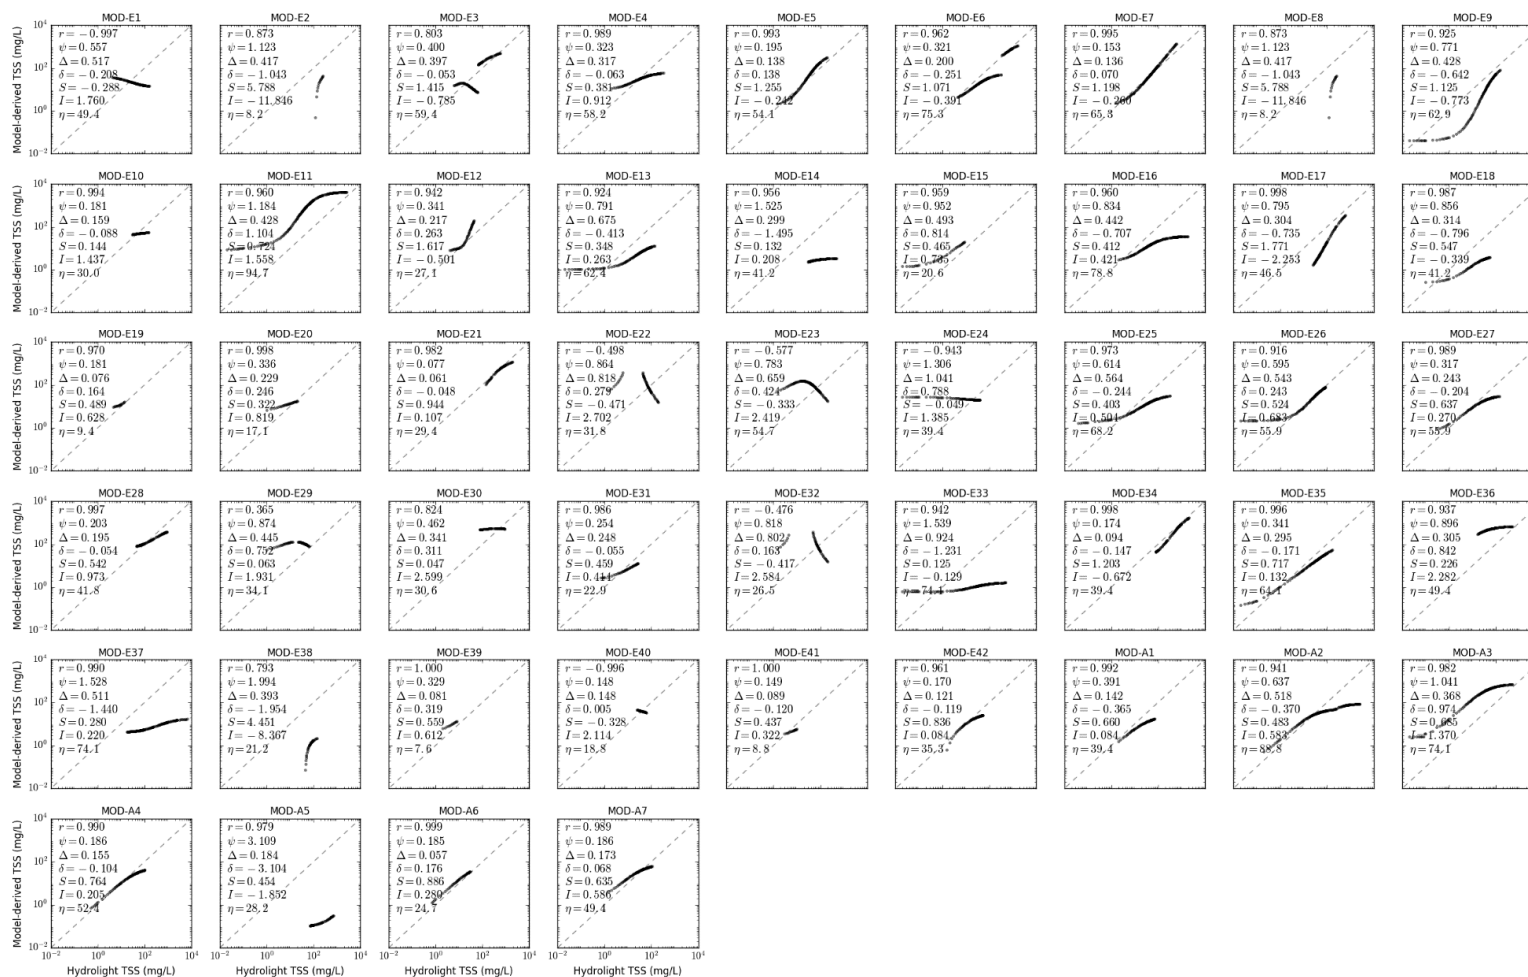Figure S2.1. Scatter plot of MODIS TSS models in CLASS-II water for brown earth sediment,  $b_b/b$  ratio of 0.018, solar zenith angle of 30°.

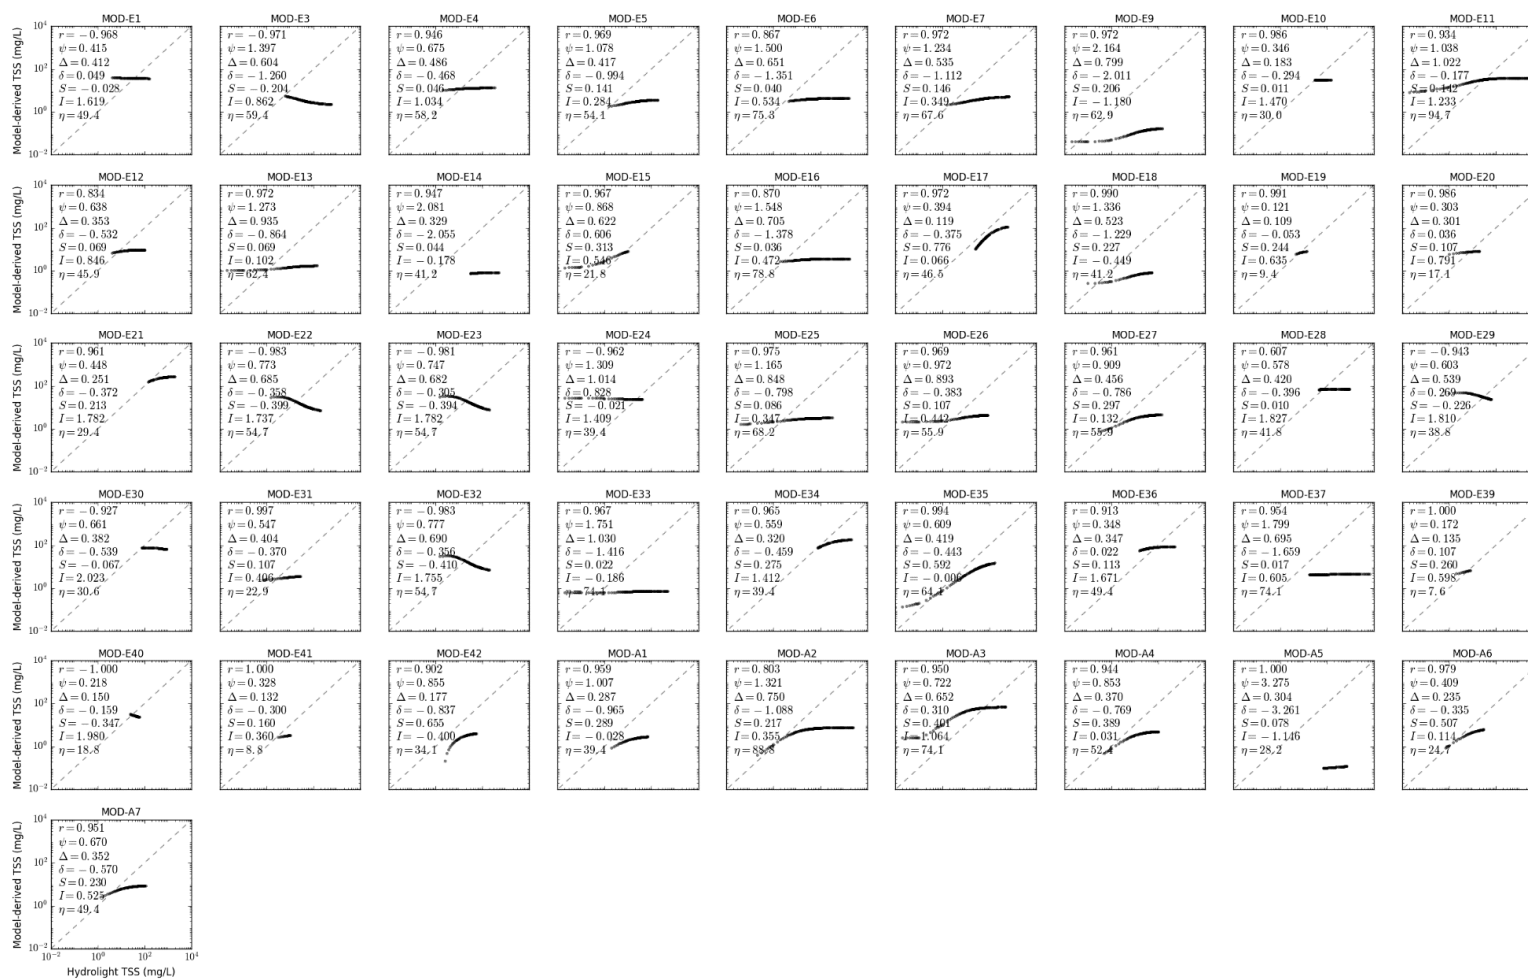

**Figure S2.2.** Scatter plot of MODIS TSS models in CLASS-II water for bukata sediment,  $b_b/b$  ratio of 0.018, solar zenith angle of 30°.

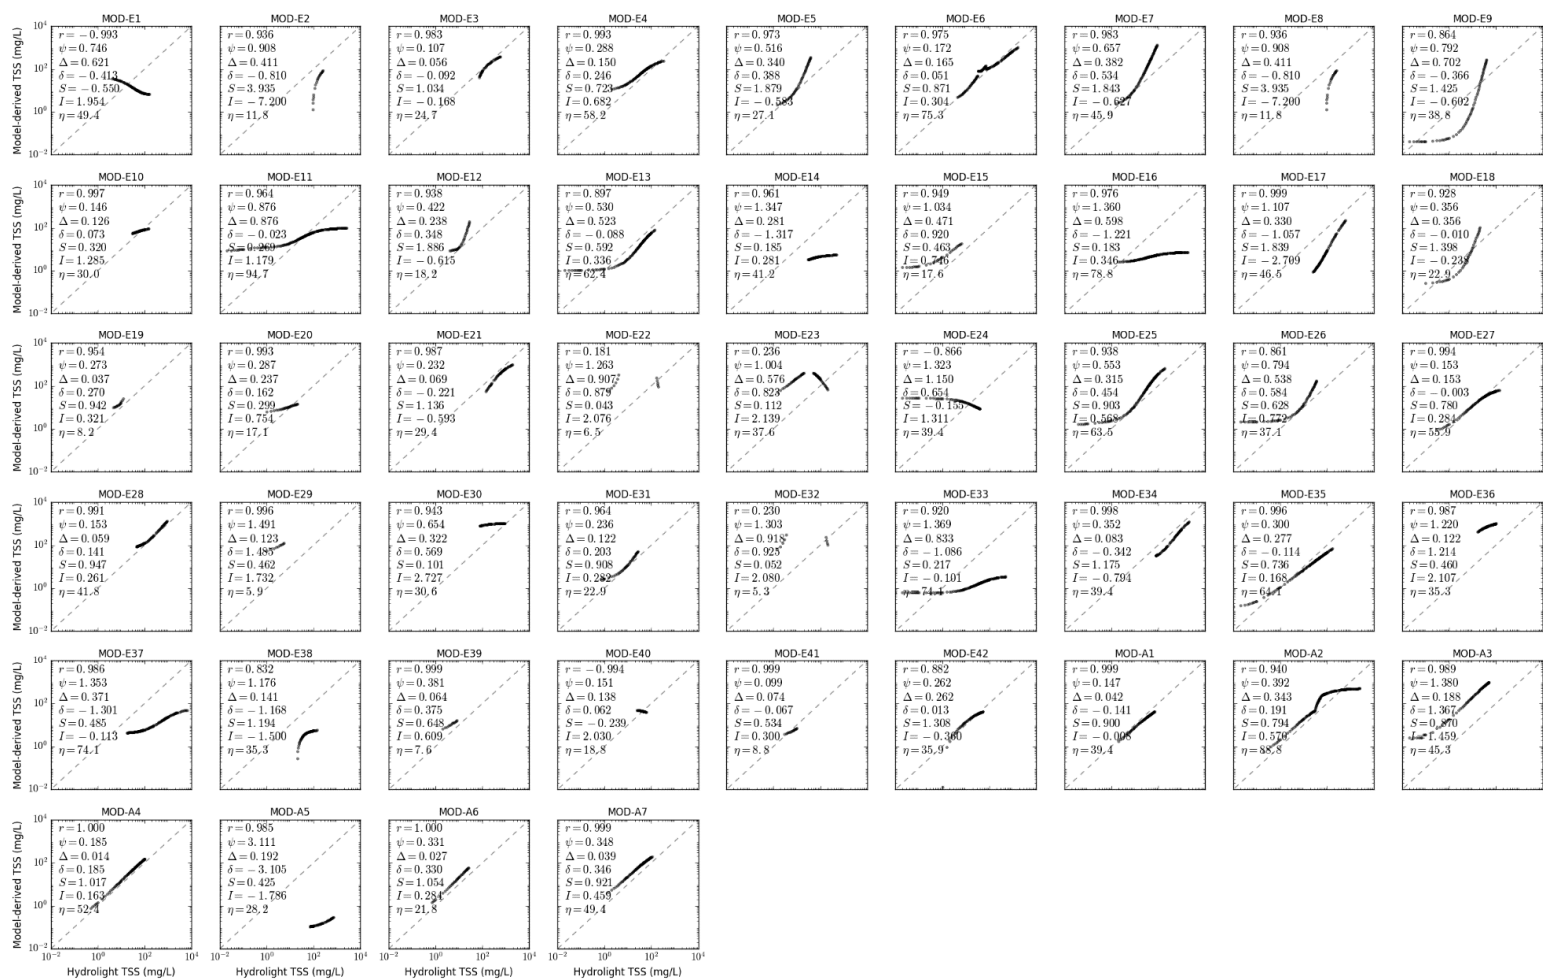

**Figure S2.3.** Scatter plot of MODIS TSS models in CLASS-II water for calcareous sand sediment,  $b_b/b$  ratio of 0.018, solar zenith angle of 30°.

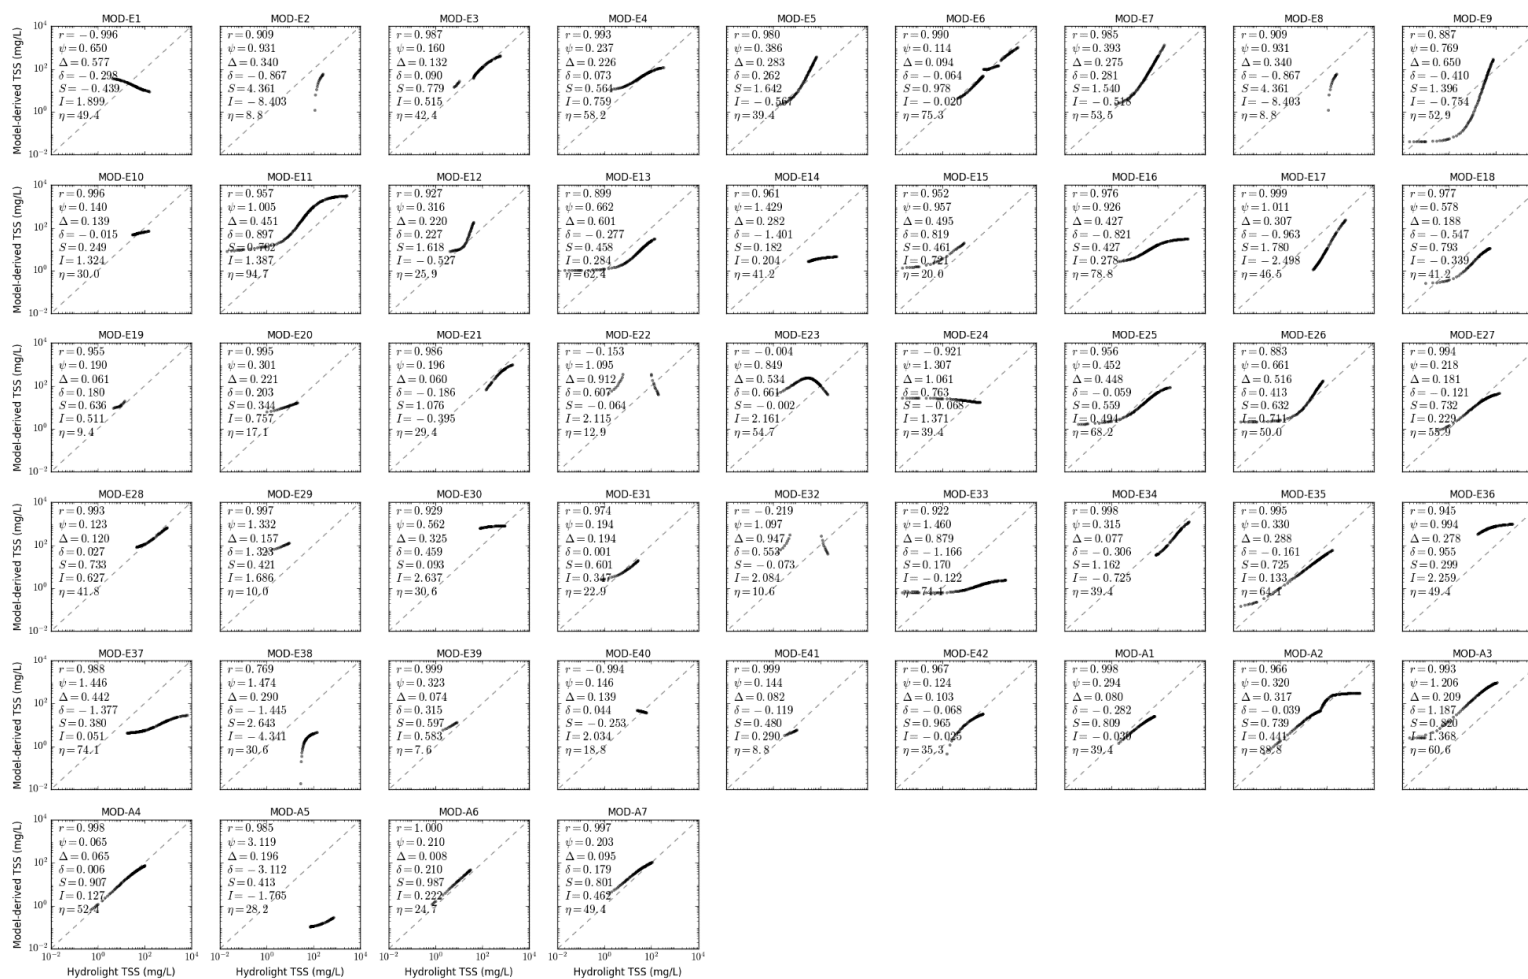

**Figure S2.4.** Scatter plot of MODIS TSS models in CLASS-II water for red clay sediment,  $b_b/b$  ratio of 0.018, solar zenith angle of  $30^\circ$ .

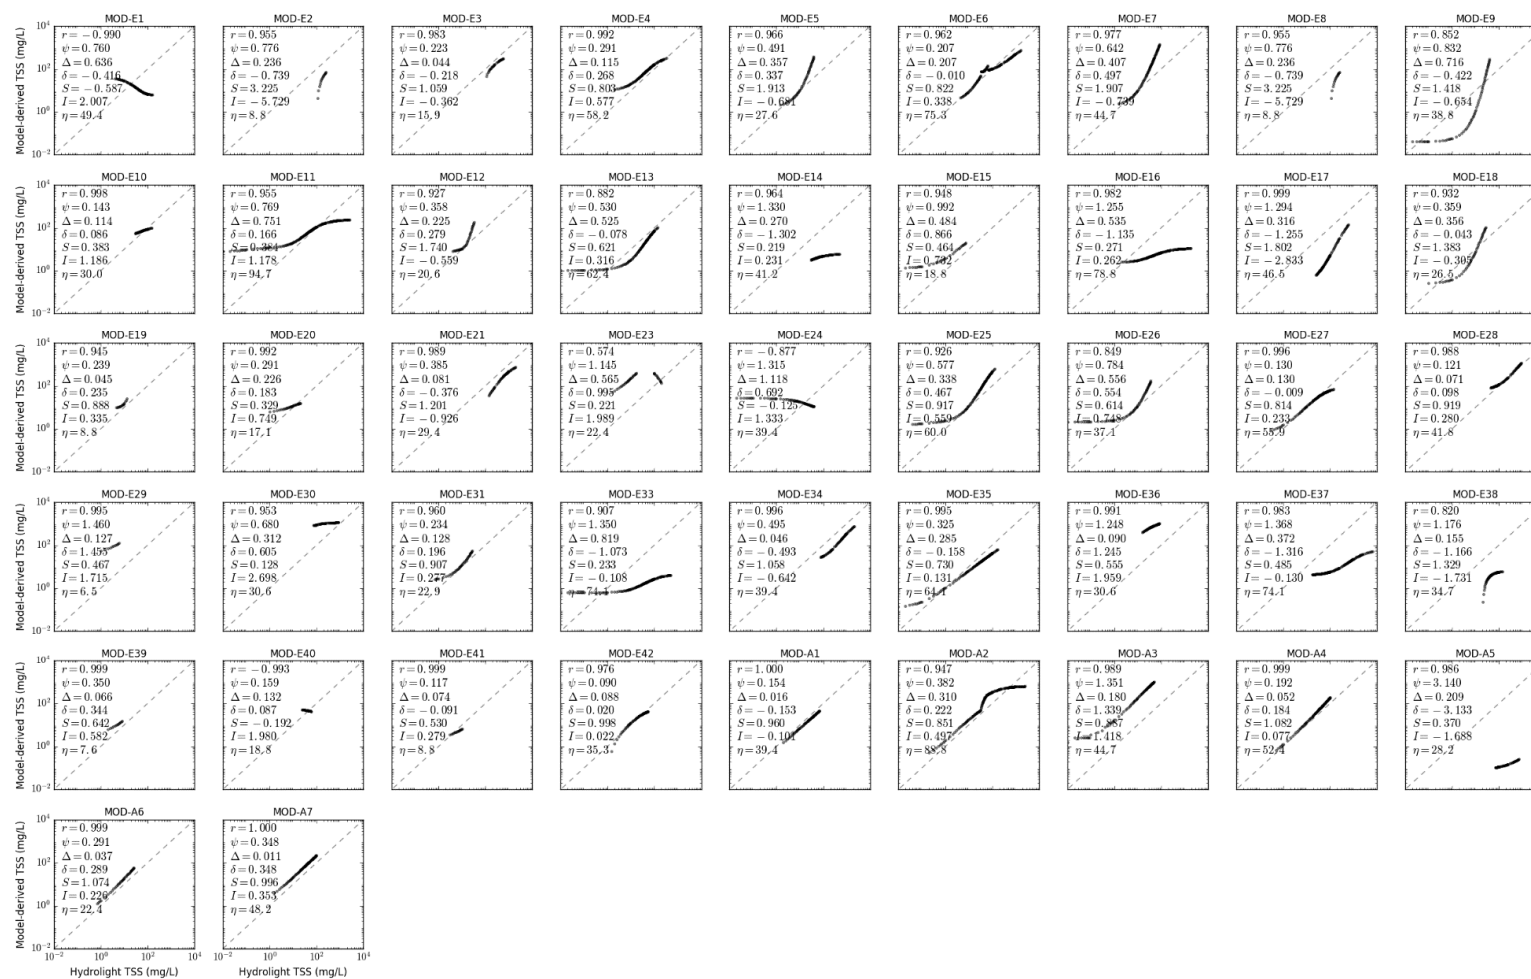

Figure S2.5. Scatter plot of MODIS TSS models in CLASS-II water for yellow clay sediment,  $b_b/b$  ratio of 0.018, solar zenith angle of  $30^\circ$ .

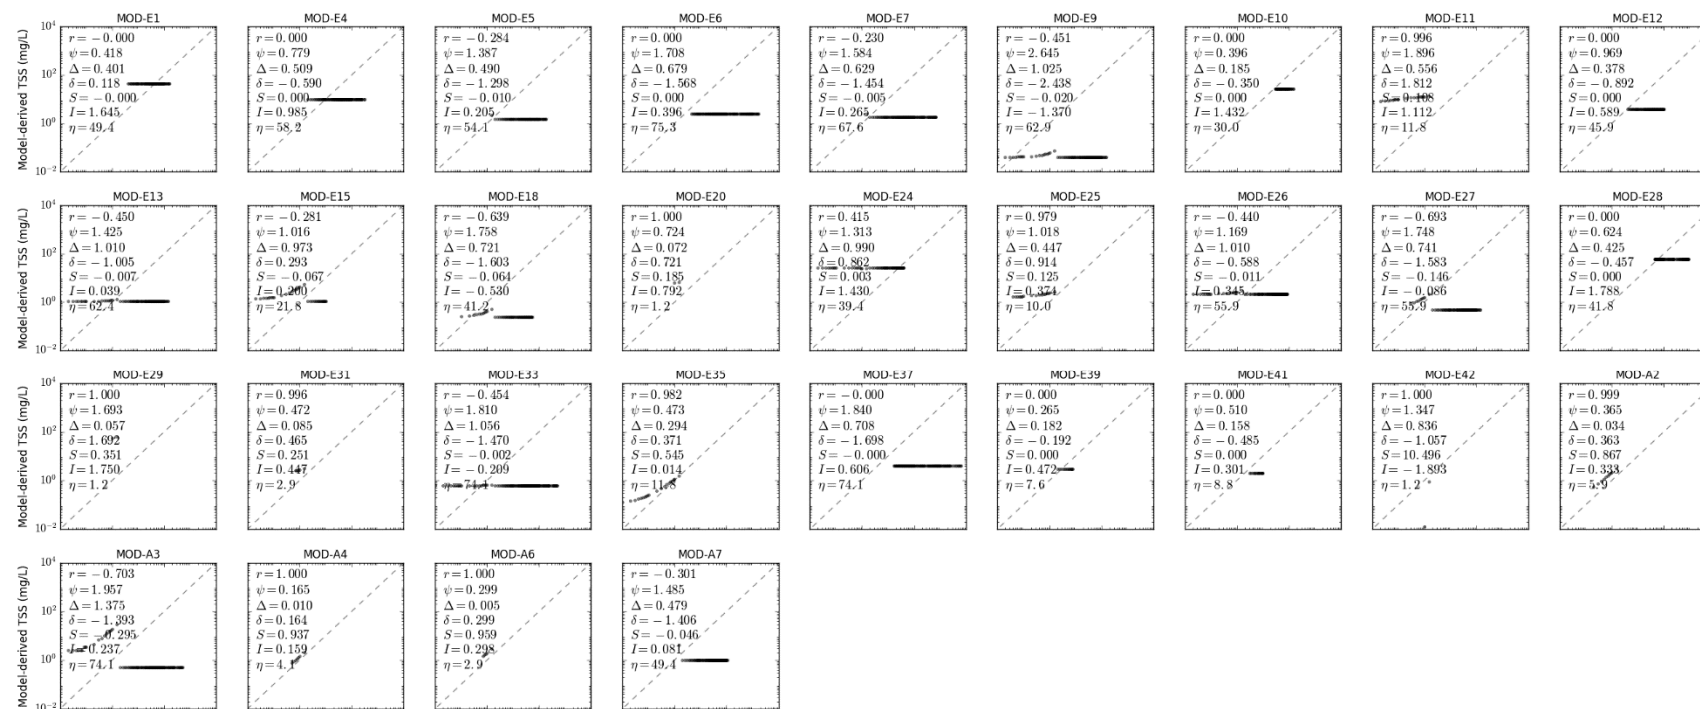

Figure S2.6 Scatter plot of MODIS TSS models in CLASS-II water for calcareous sand sediment,  $b_b/b$  ratio of 0.001, solar zenith angle of  $30^\circ$ .

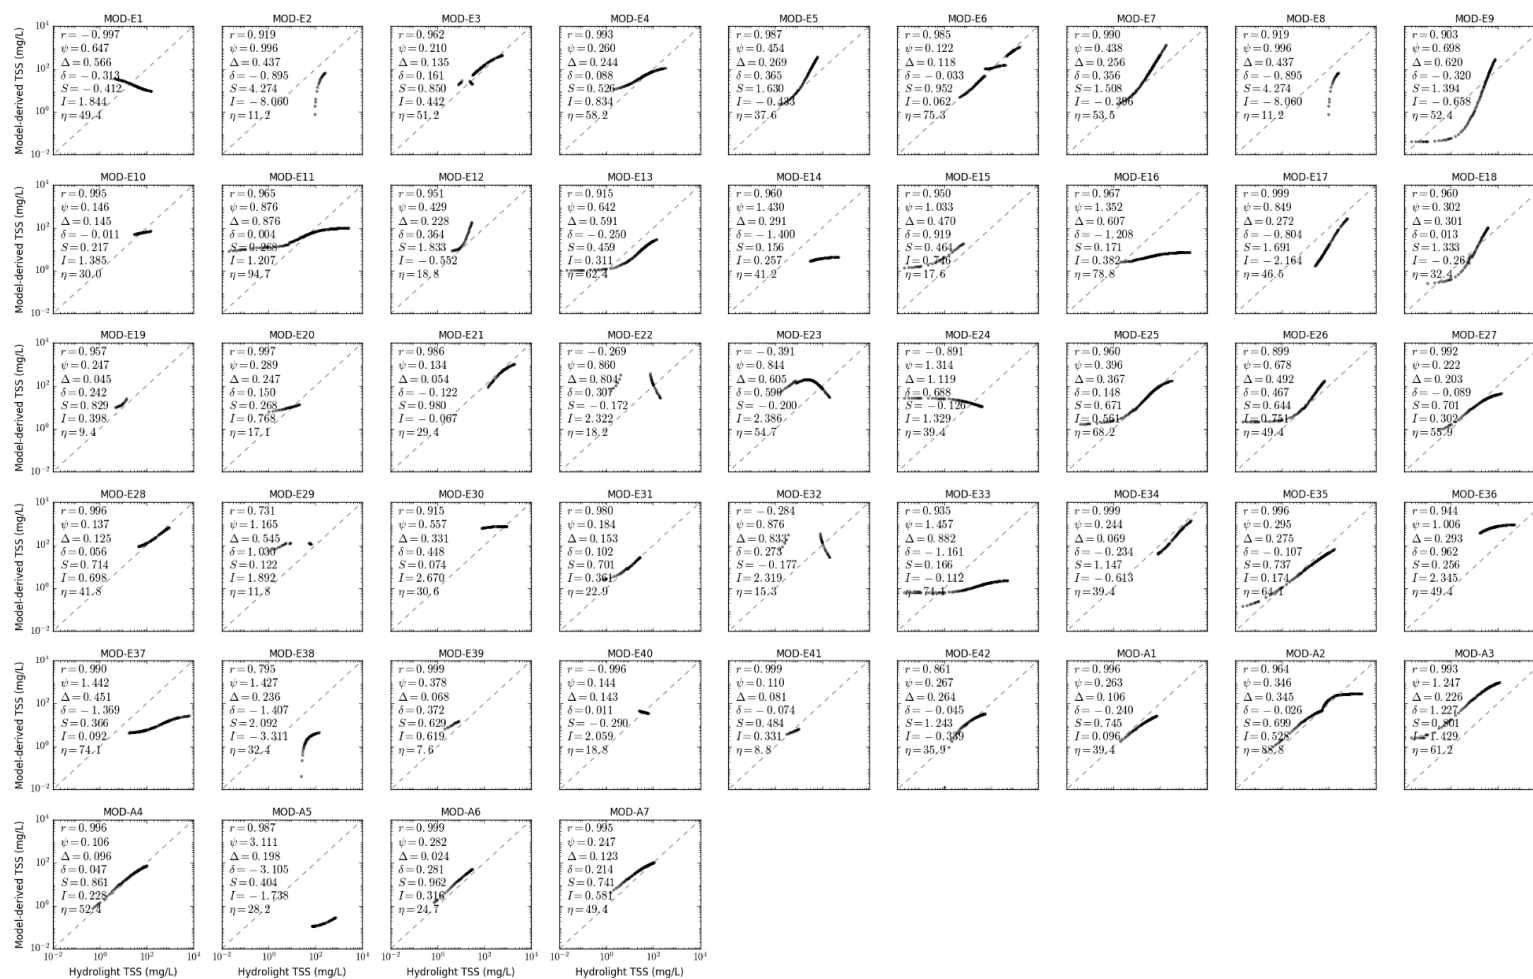

Figure S2.7. Scatter plot of MODIS TSS models in CLASS-II water for calcareous sand sediment,  $b_b/b$  ratio of 0.01, solar zenith angle of  $30^\circ$ .

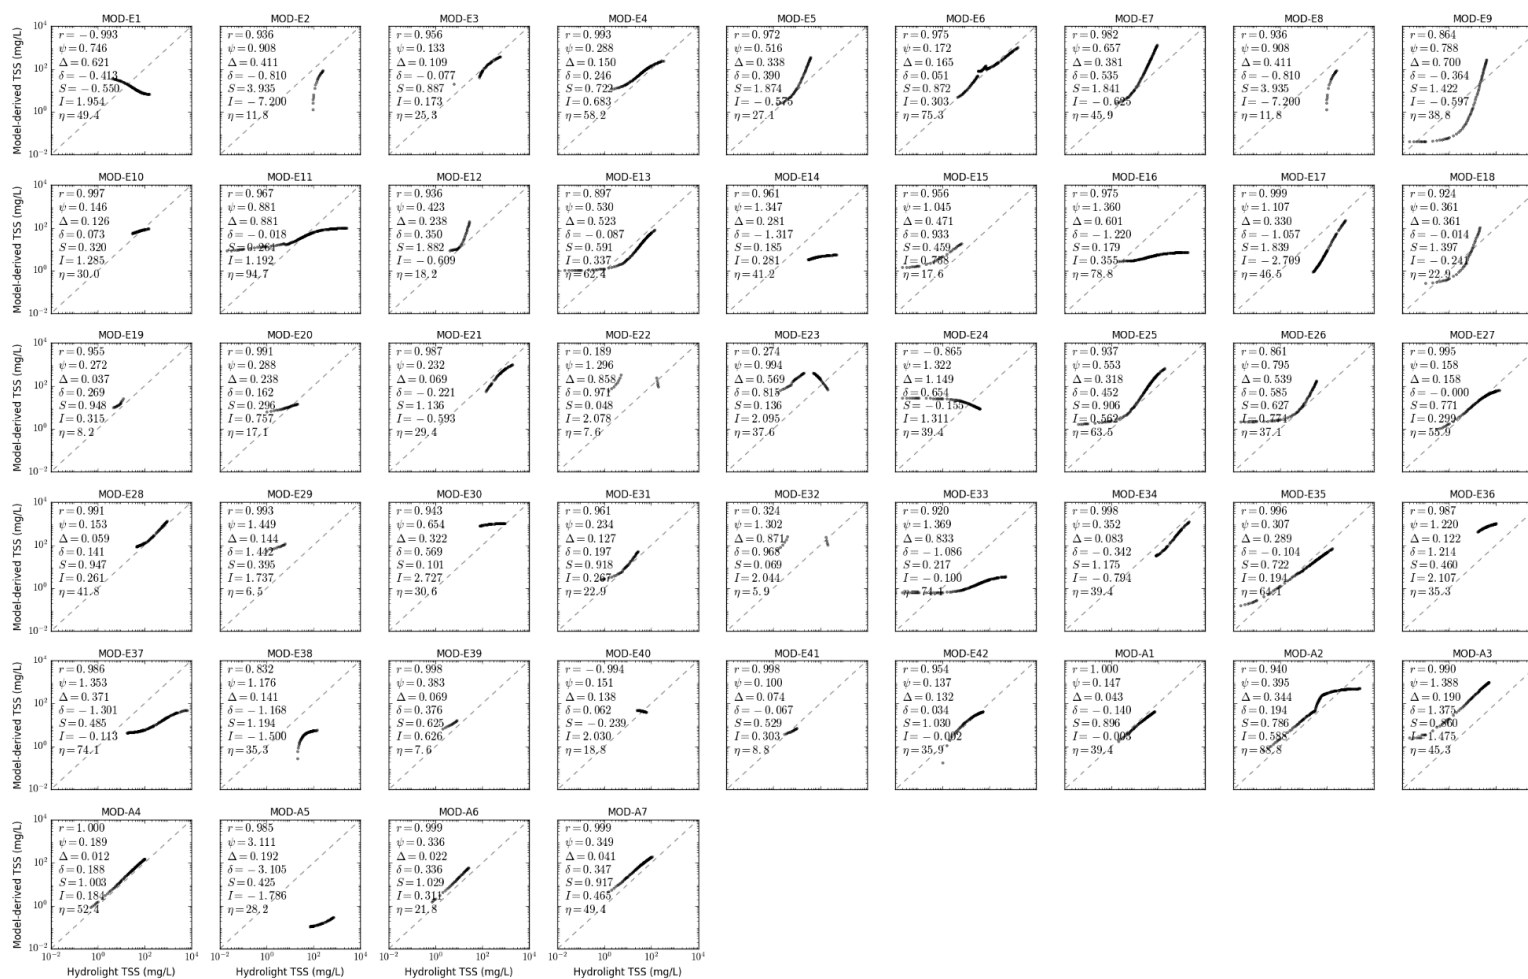

Figure S2.8. Scatter plot of MODIS TSS models in CLASS-II water for calcareous sand sediment,  $b_b/b$  ratio of 0.05, solar zenith angle of  $30^\circ$ .



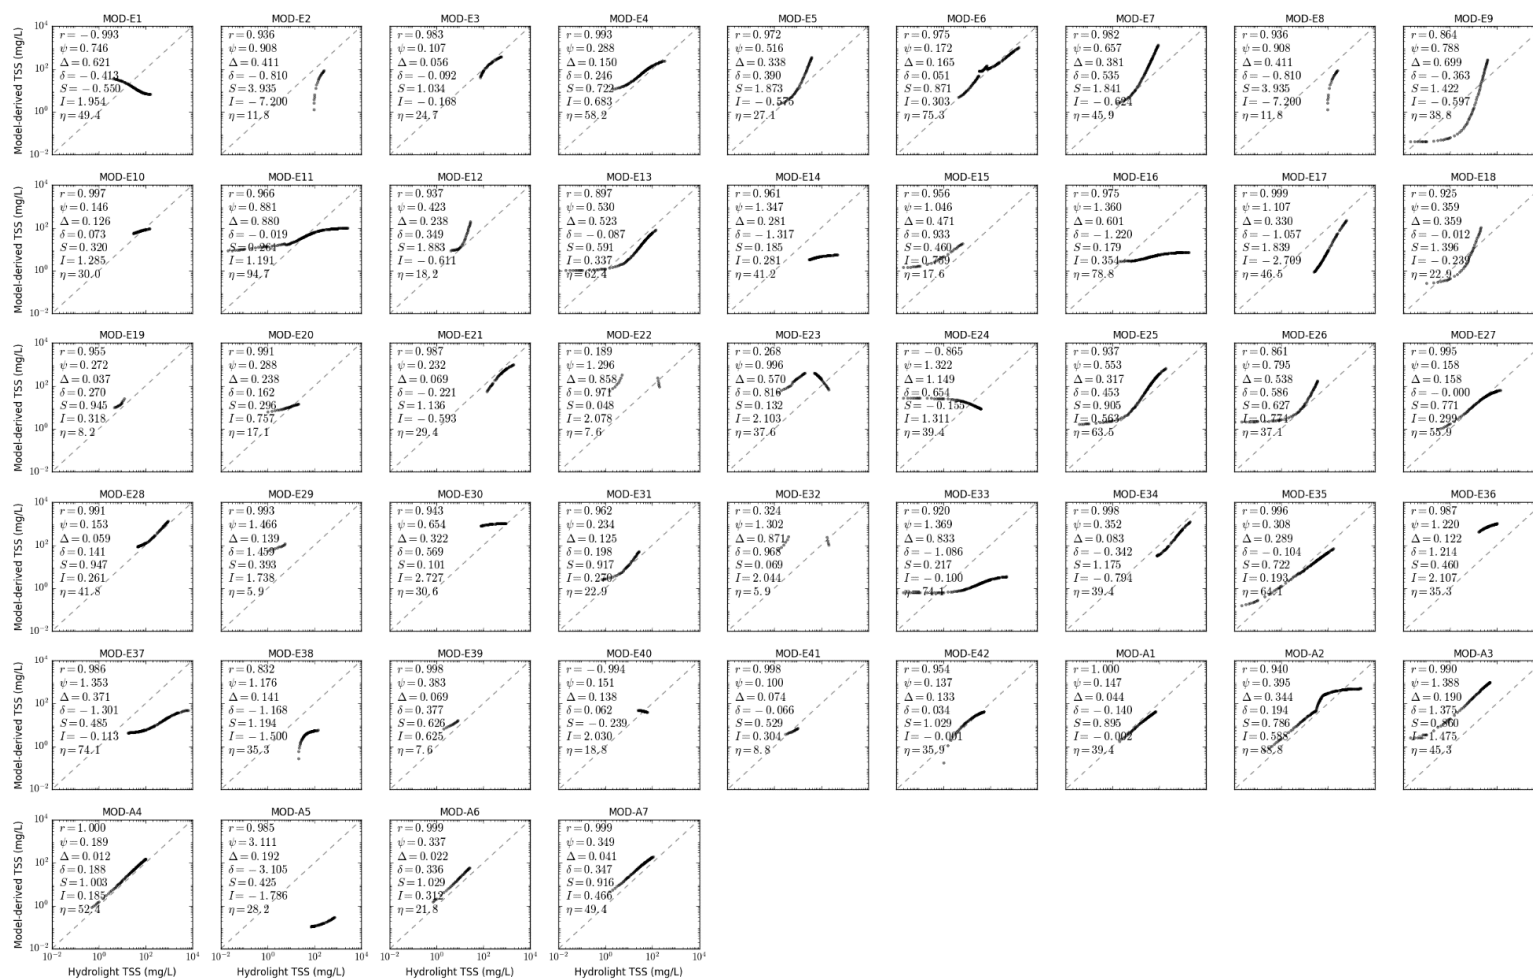

Figure S2.9. Scatter plot of MODIS TSS models in CLASS-II water for calcareous sand sediment,  $b_b/b$  ratio of 0.1, solar zenith angle of  $30^\circ$ .

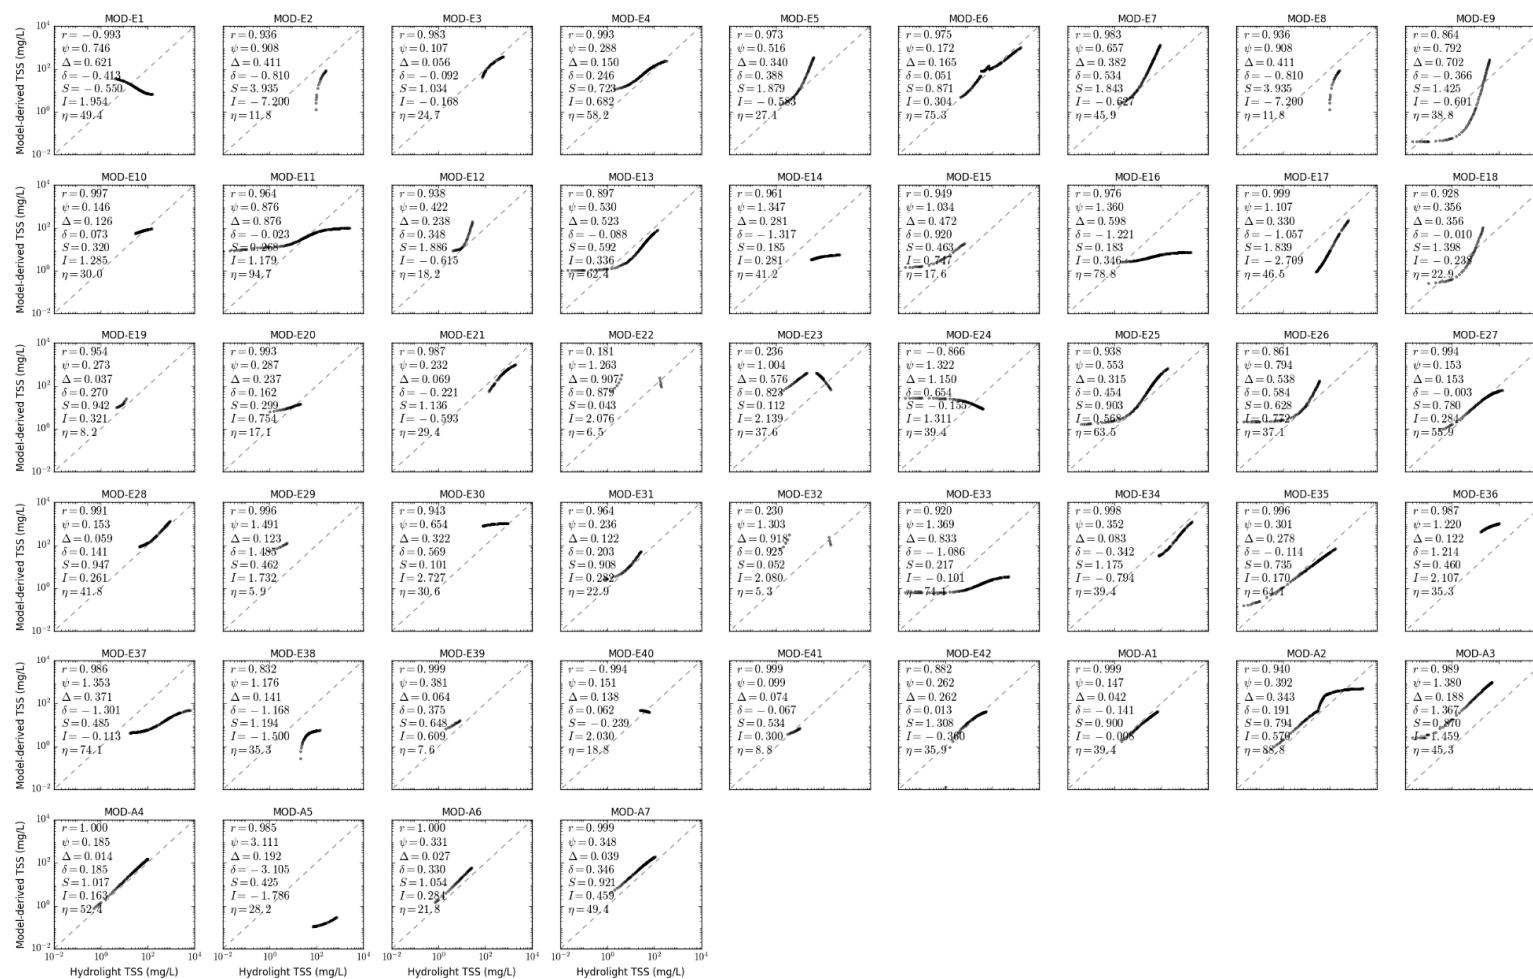

Figure S2.10. Scatter plot of MODIS TSS models in CLASS-II water for calcareous sand sediment,  $b_b/b$  ratio of 0.018, solar zenith angle of  $15^\circ$ .

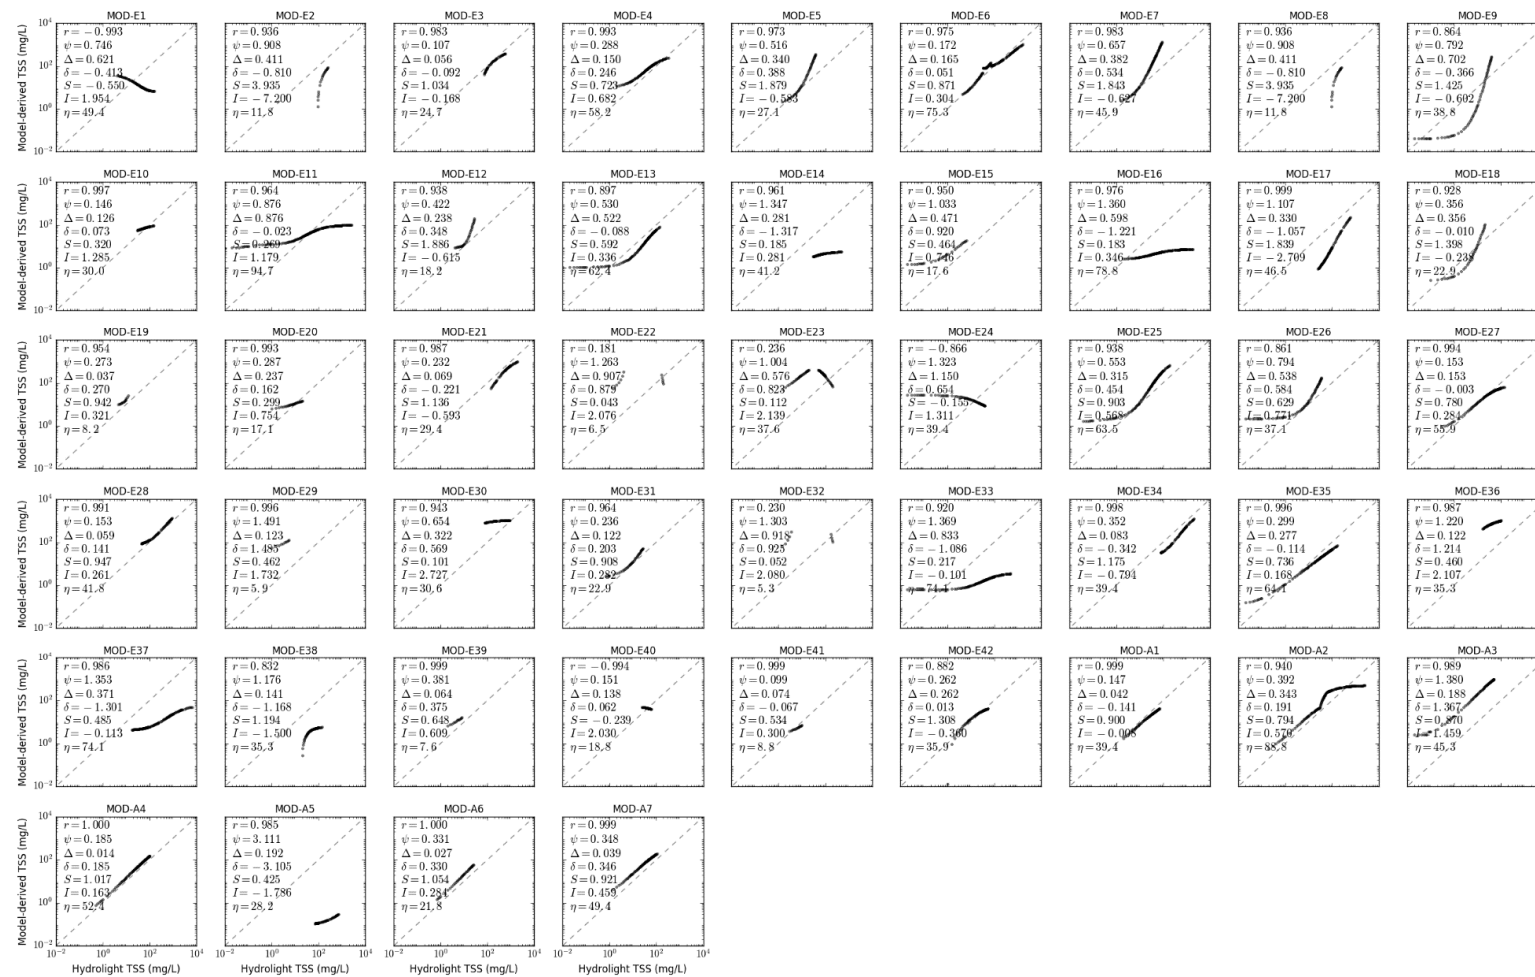

Figure S2.11. Scatter plot of MODIS TSS models in CLASS-II water for calcareous sand sediment,  $b_b/b$  ratio of 0.018, solar zenith angle of  $45^\circ$ .

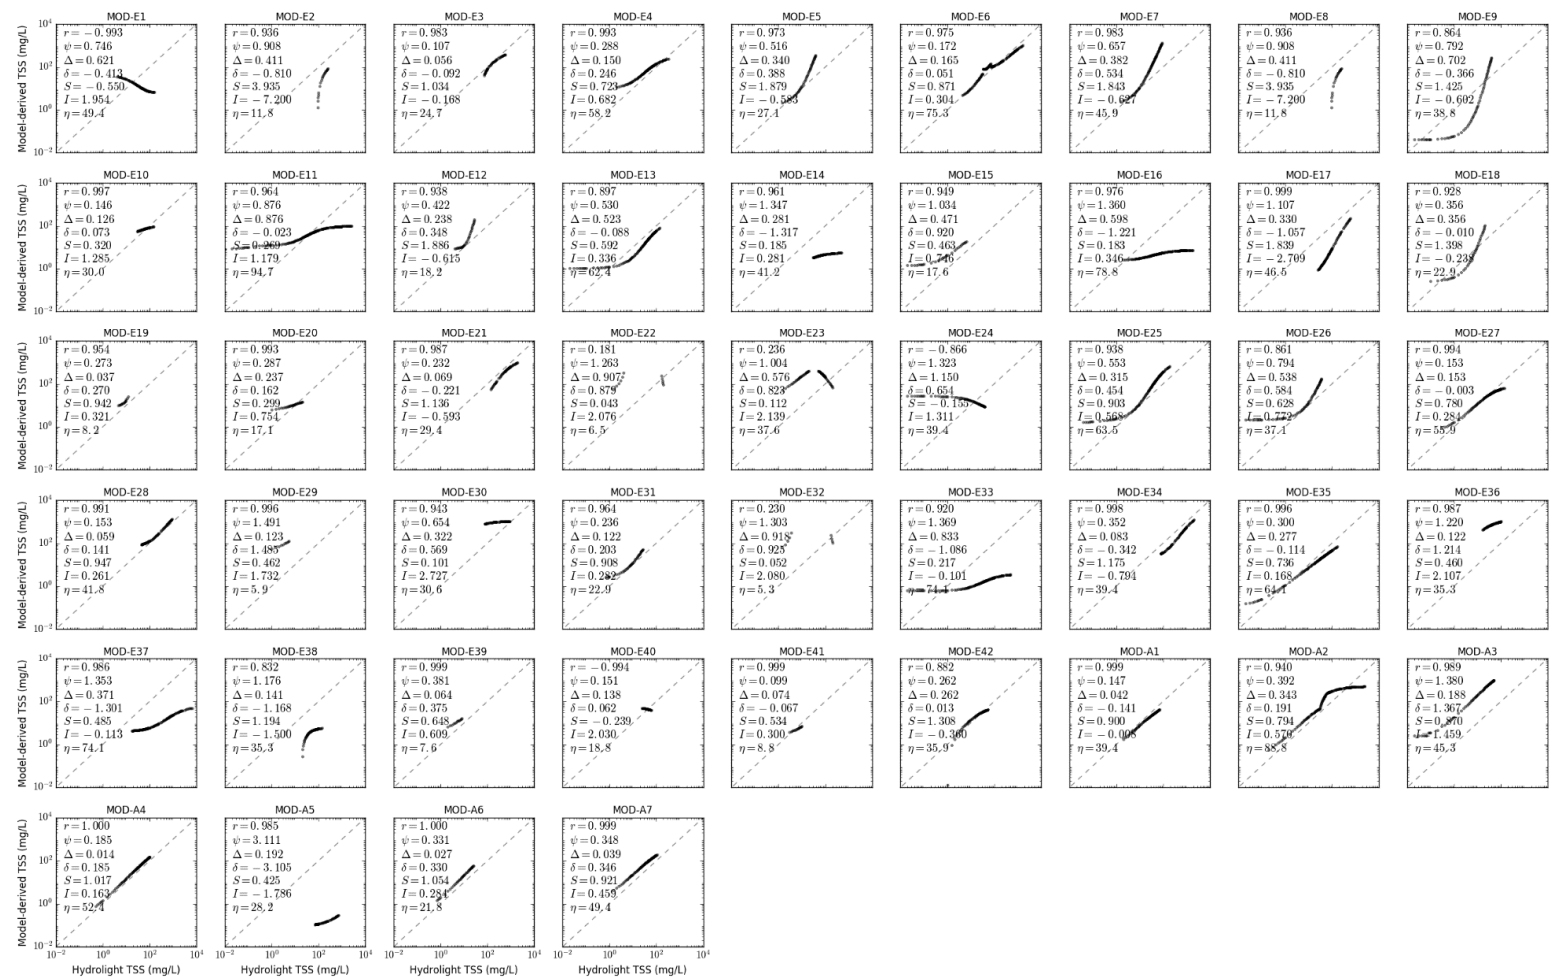

Figure S2.12. Scatter plot of MODIS TSS models in CLASS-II water for calcareous sand sediment,  $b_b/b$  ratio of 0.018, solar zenith angle of 60°.

Supplementary Materials S3. Scatter Plot of MODIS TSS Models for CLASS-III Water

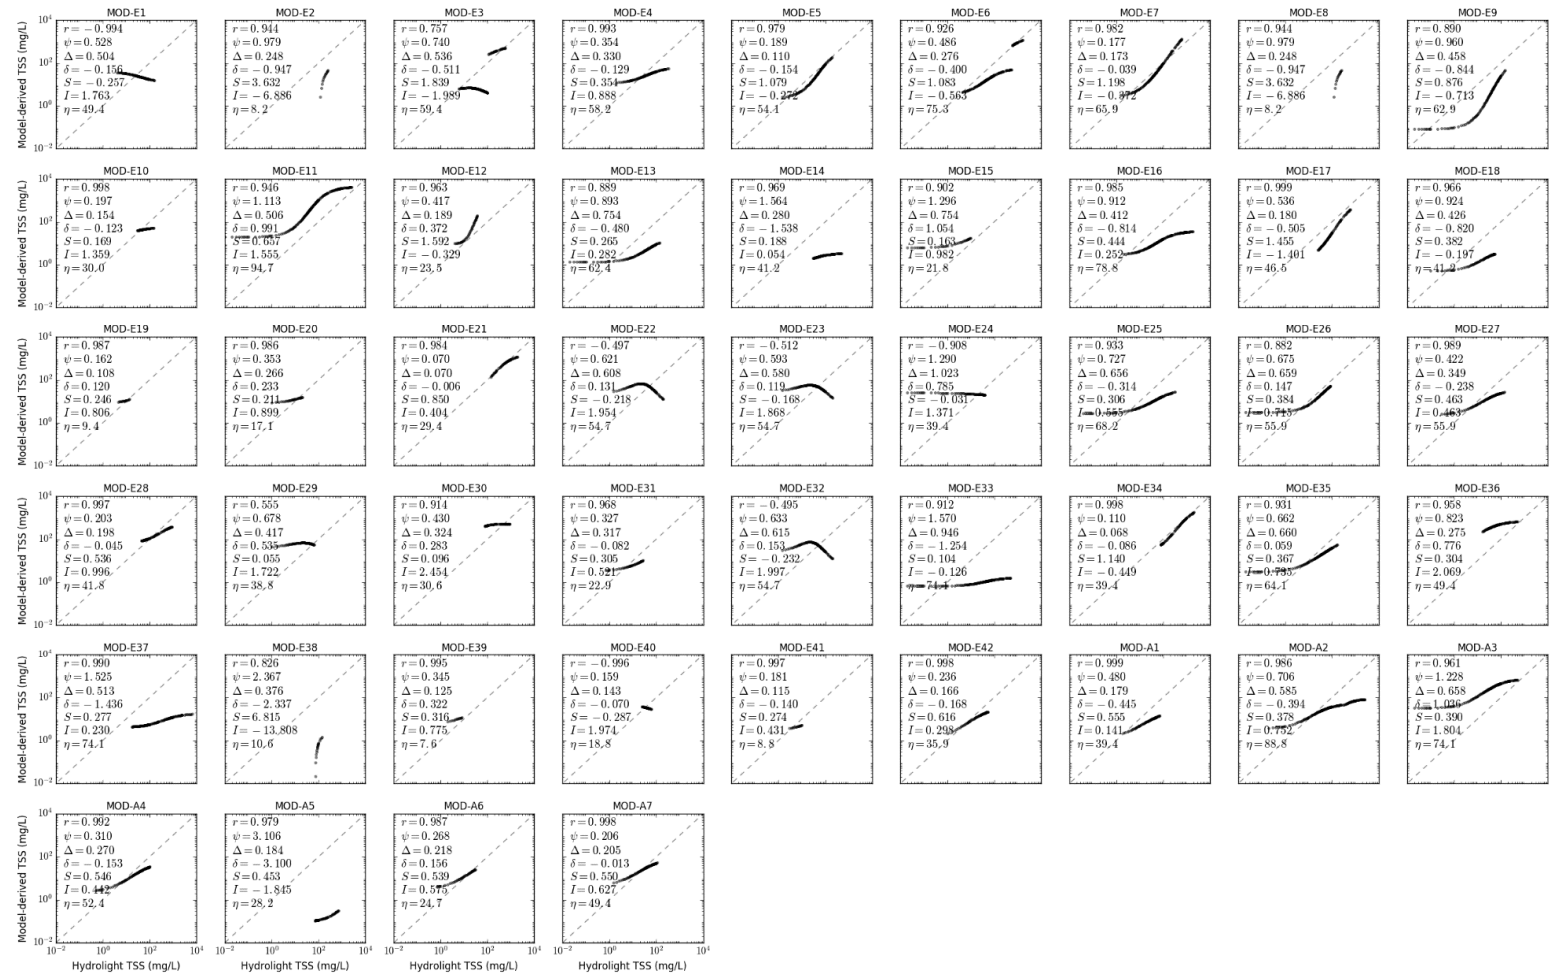

Figure S3.1. Scatter plot of MODIS TSS models in CLASS-III water for brown earth sediment,  $b_b/b$  ratio of 0.018, solar zenith angle of 30°.

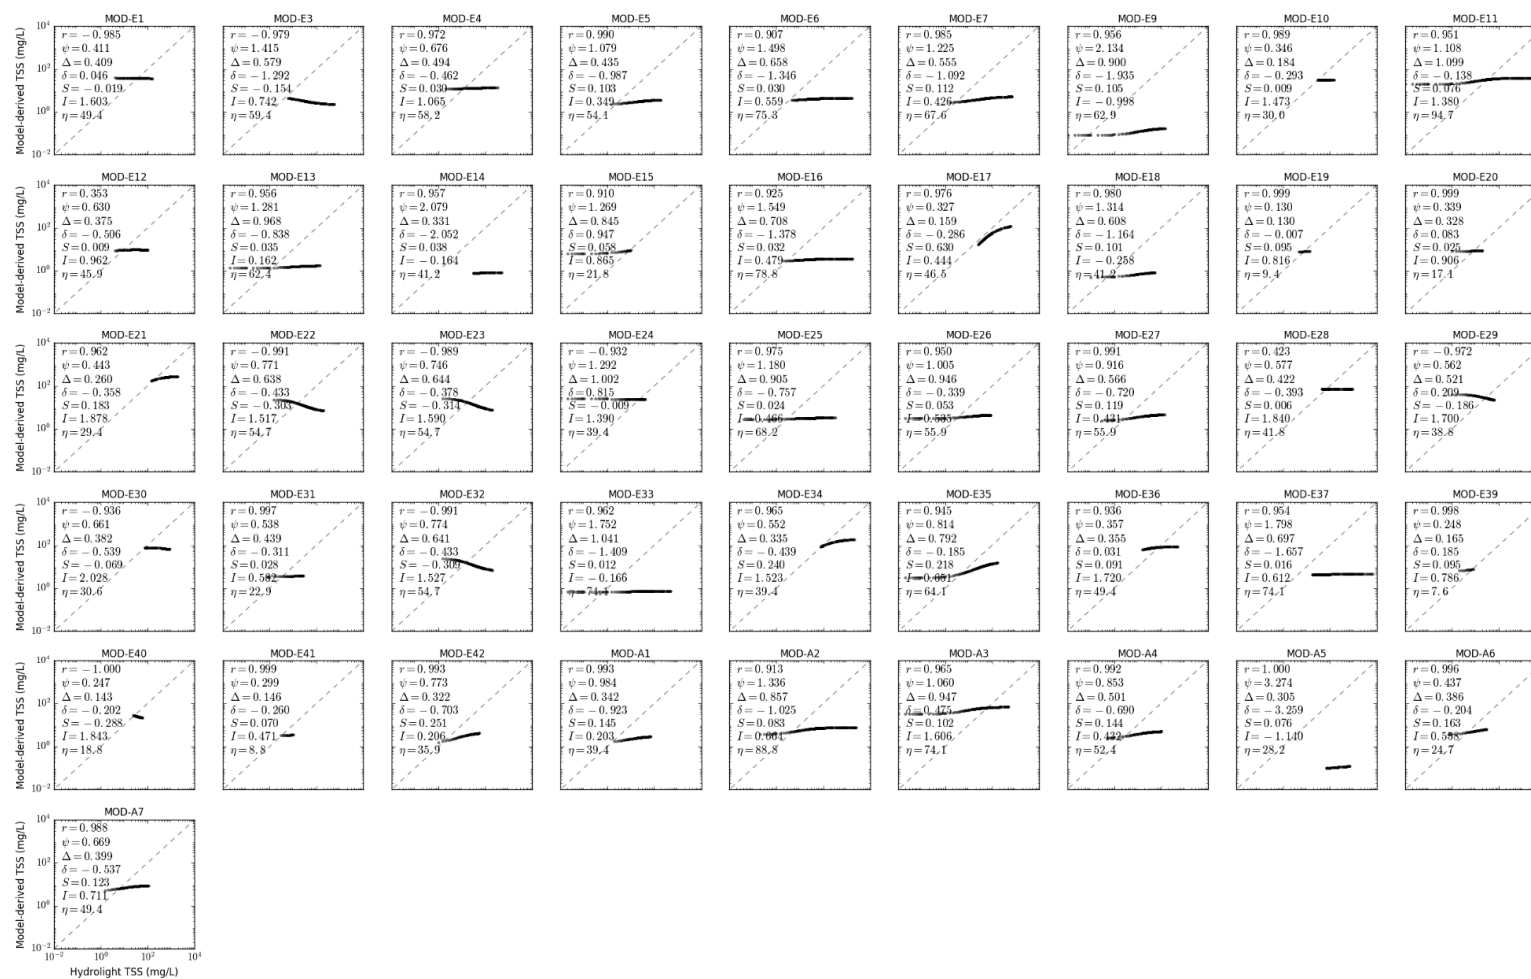

**Figure S3.2.** Scatter plot of MODIS TSS models in CLASS-III water for bukata sediment,  $b_b/b$  ratio of 0.018, solar zenith angle of 30°.

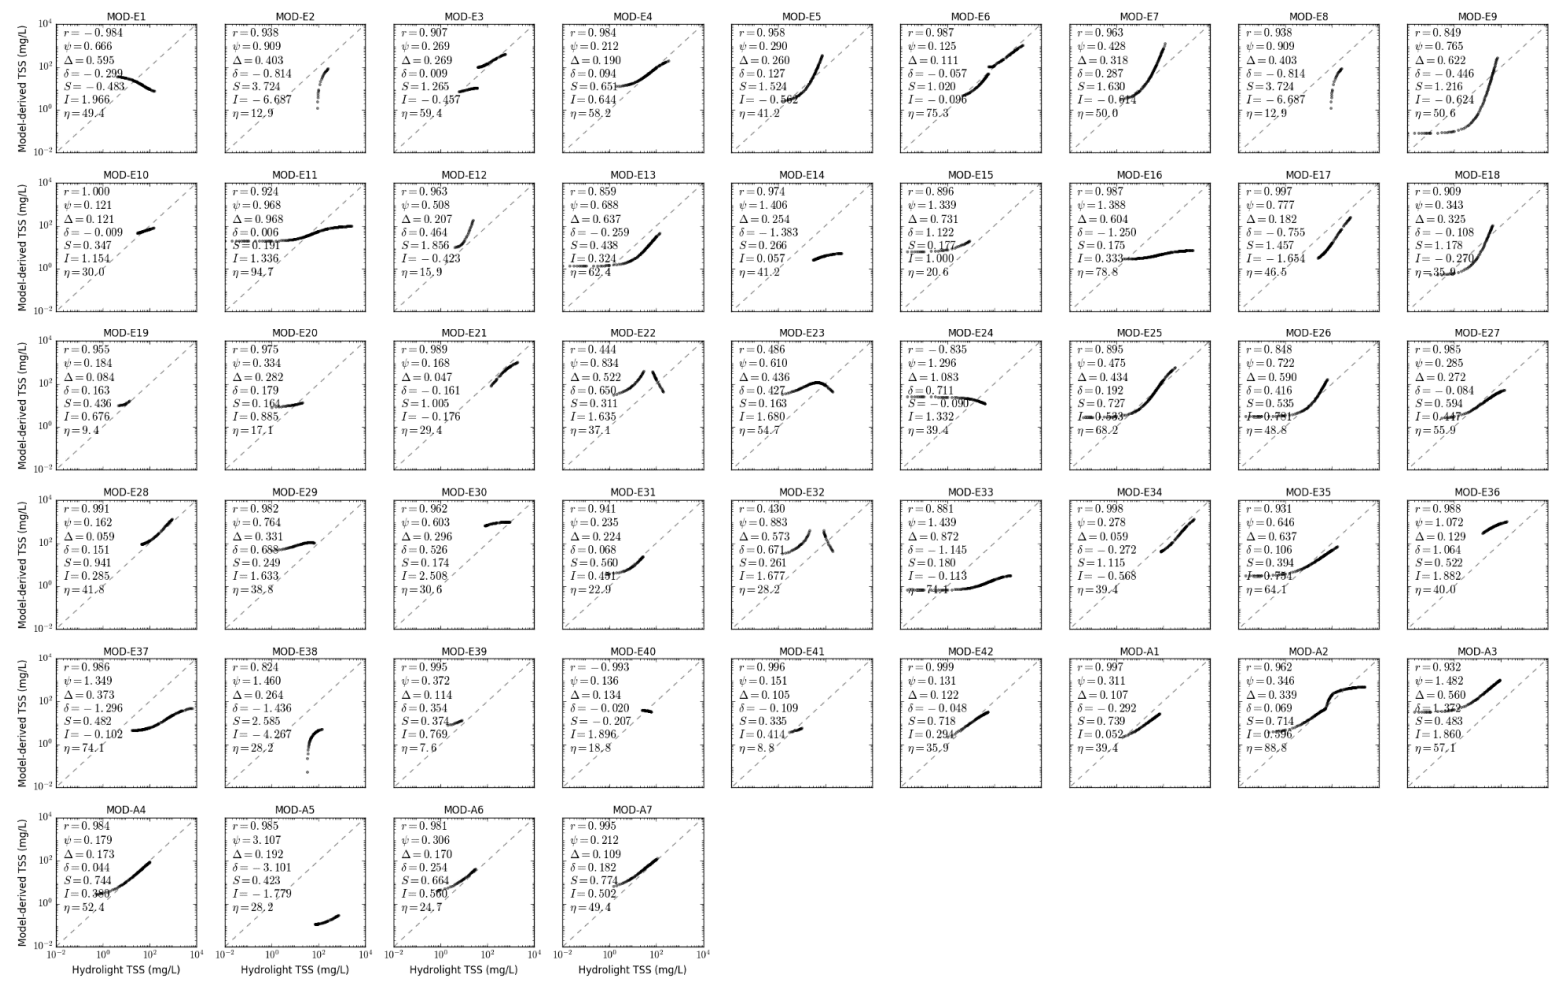

Figure S3.3. Scatter plot of MODIS TSS models in CLASS-III water for calcareous sand sediment,  $b_b/b$  ratio of 0.018, solar zenith angle of 30°.

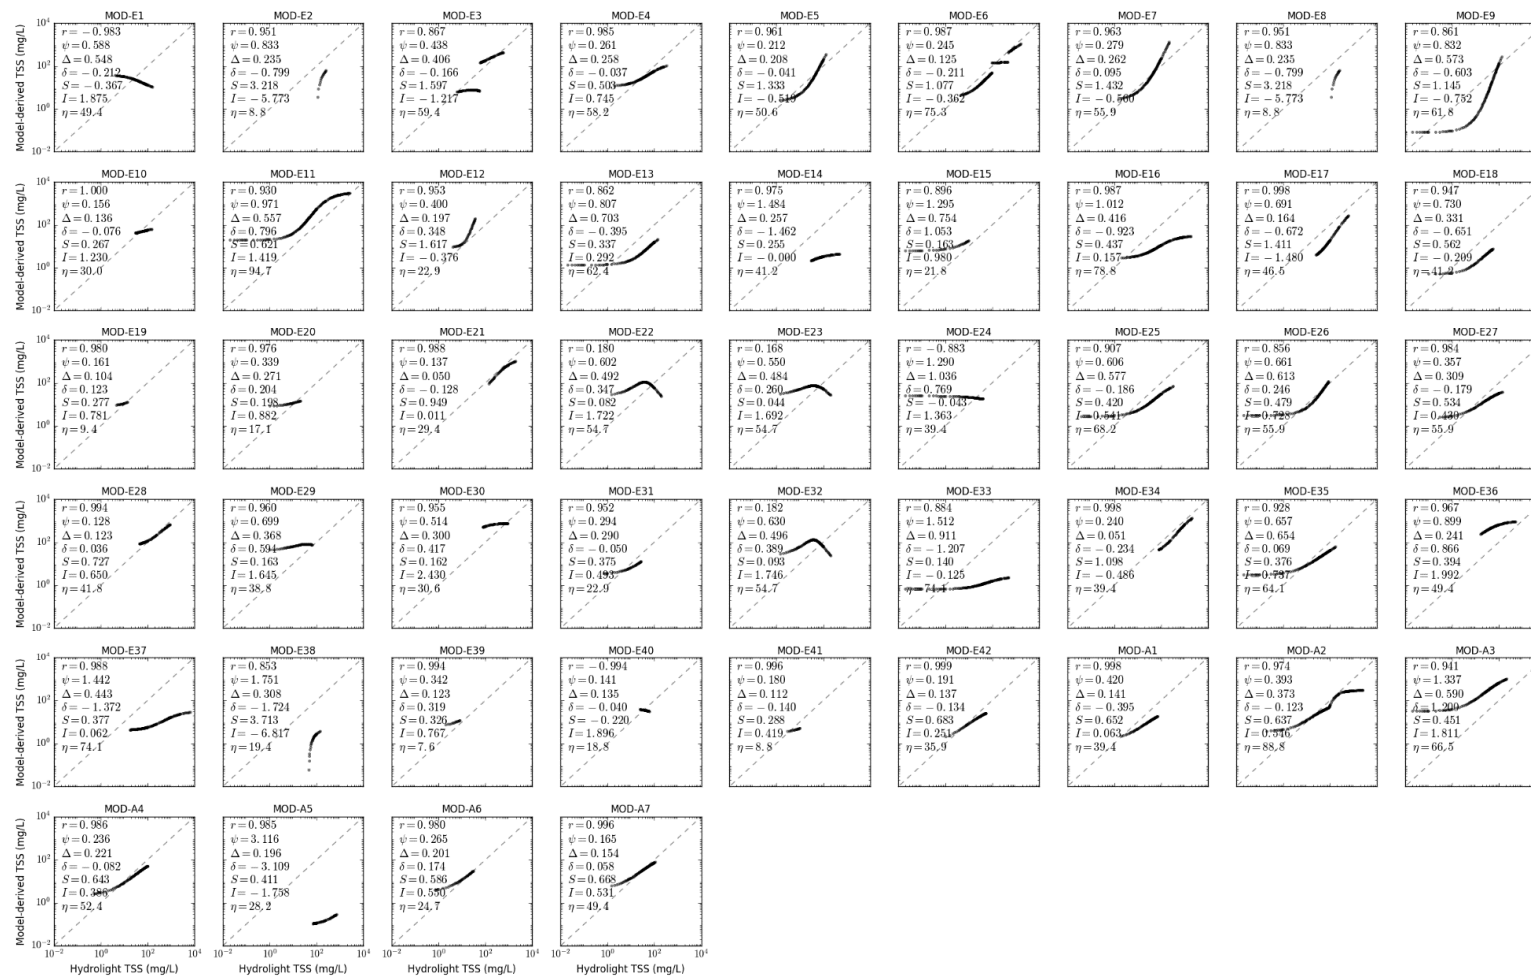

**Figure S3.4.** Scatter plot of MODIS TSS models in CLASS-III water for red clay sediment,  $b_b/b$  ratio of 0.018, solar zenith angle of  $30^\circ$ .



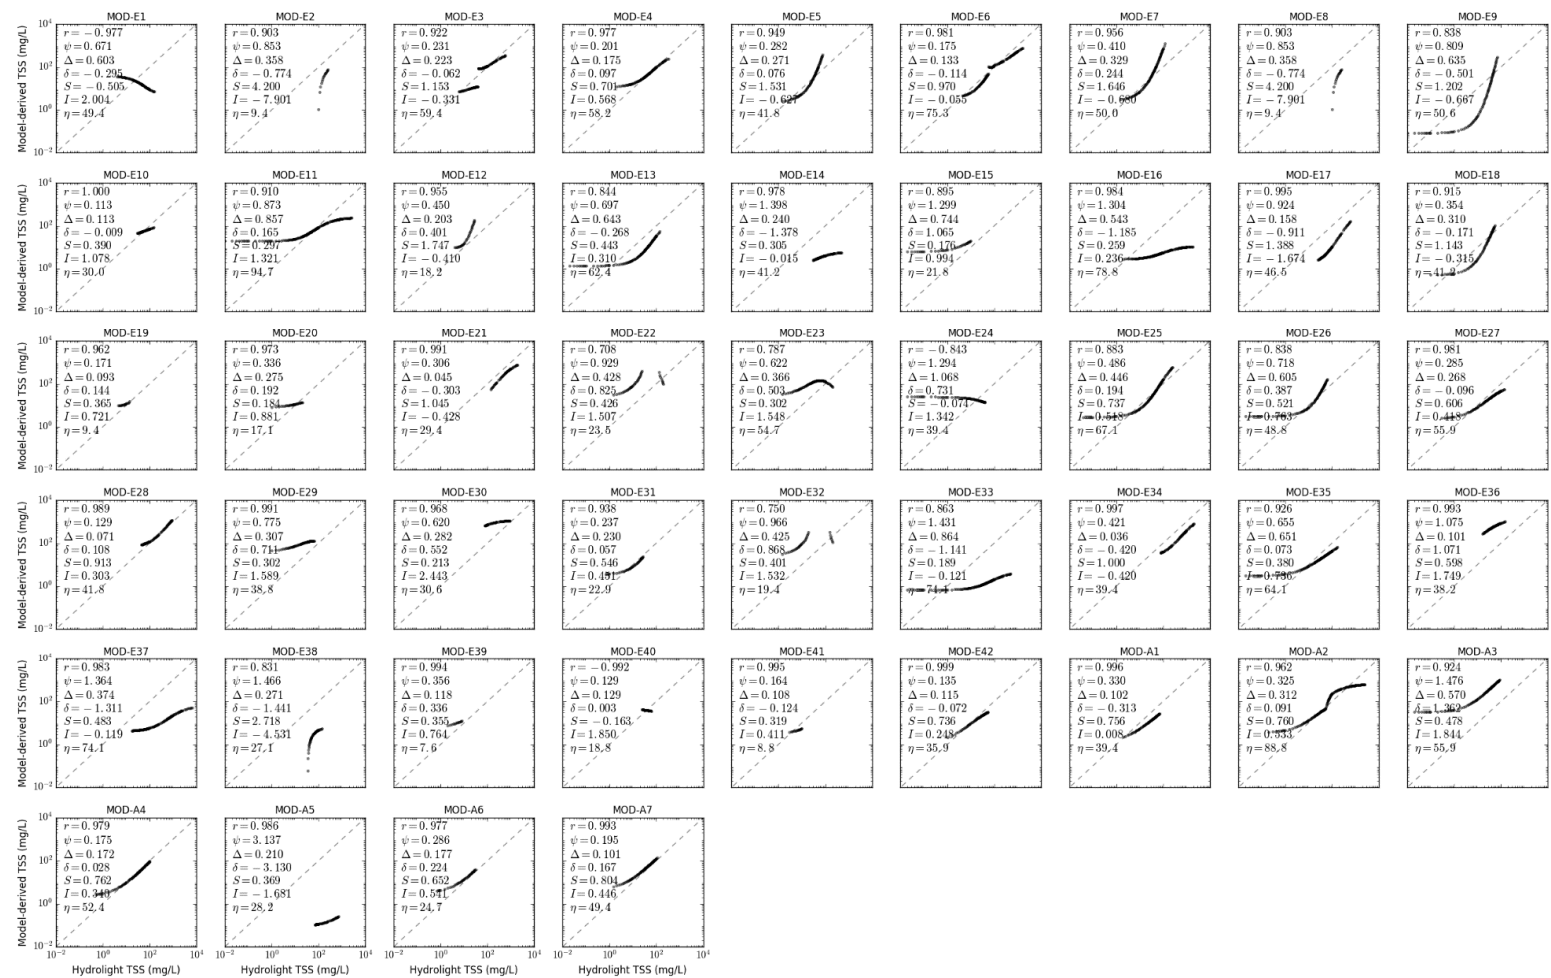

Figure S3.5. Scatter plot of MODIS TSS models in CLASS-III water for yellow clay sediment,  $b_b/b$  ratio of 0.018, solar zenith angle of 30°.

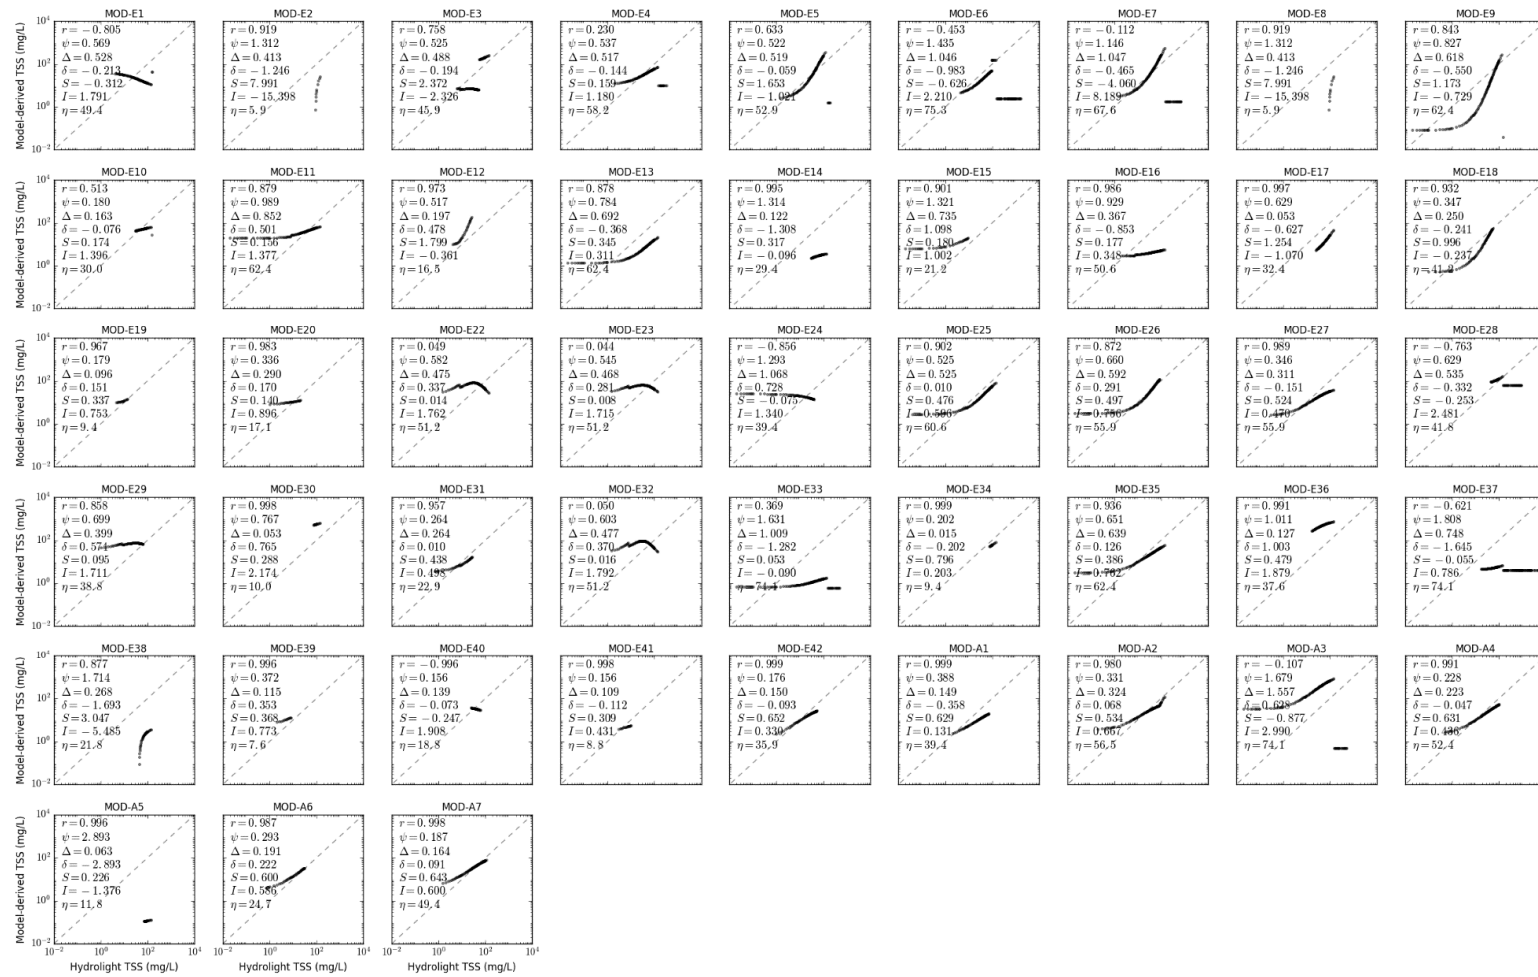

Figure S3.6. Scatter plot of MODIS TSS models in CLASS-III water for calcareous sand sediment,  $b_b/b$  ratio of 0.001, solar zenith angle of  $30^\circ$ .

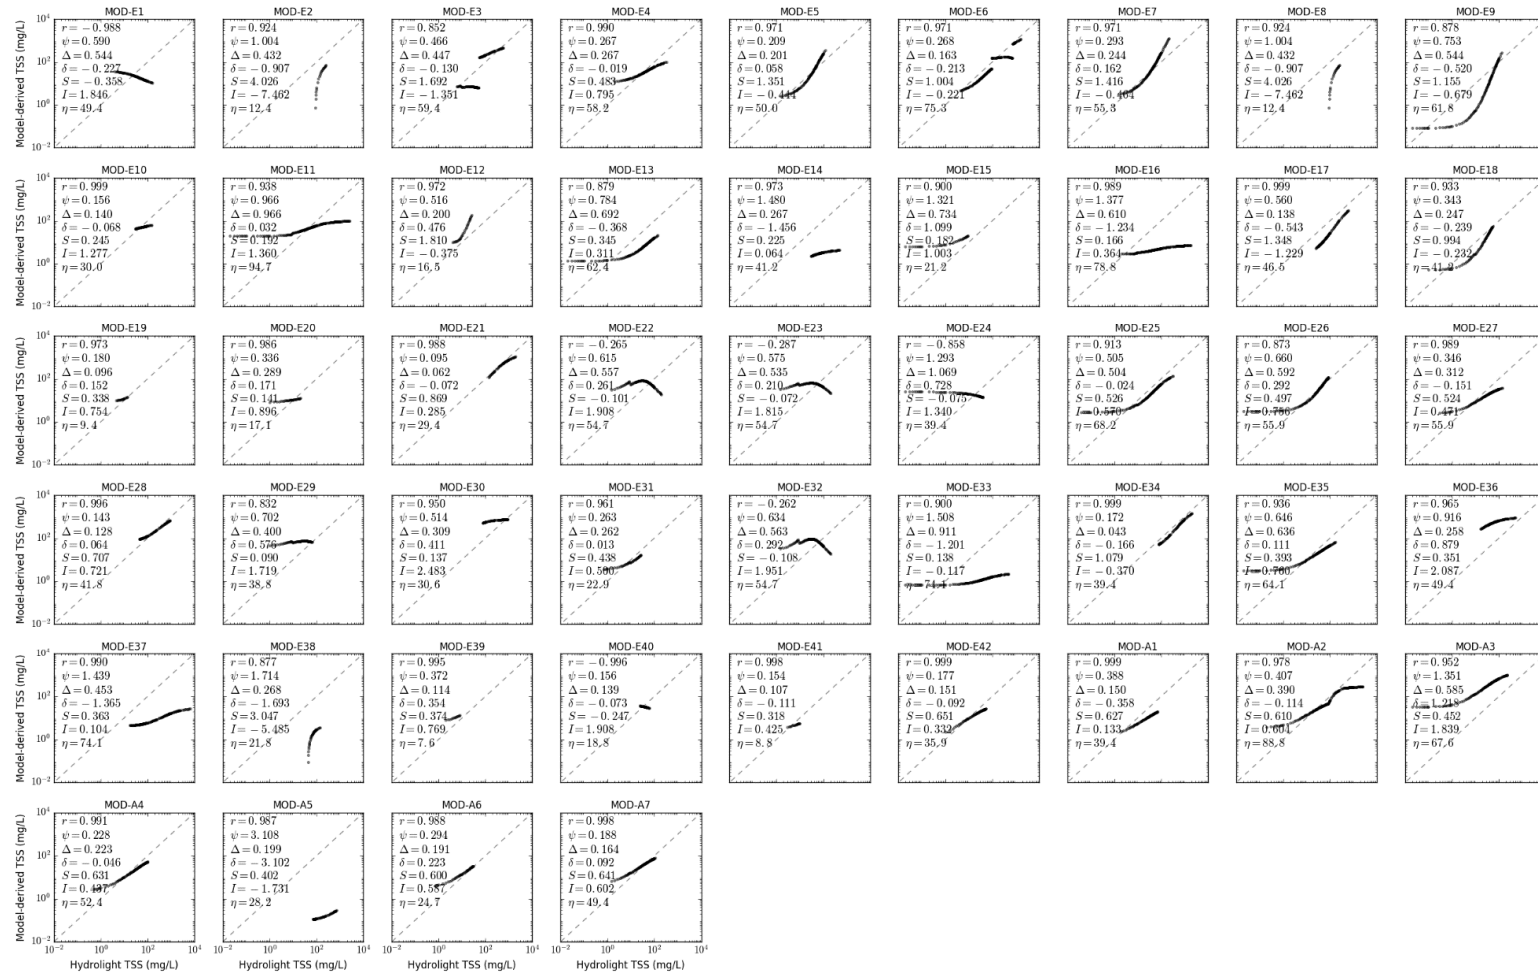

Figure S3.7. Scatter plot of MODIS TSS models in CLASS-III water for calcareous sand sediment,  $b_b/b$  ratio of 0.01, solar zenith angle of 30°.

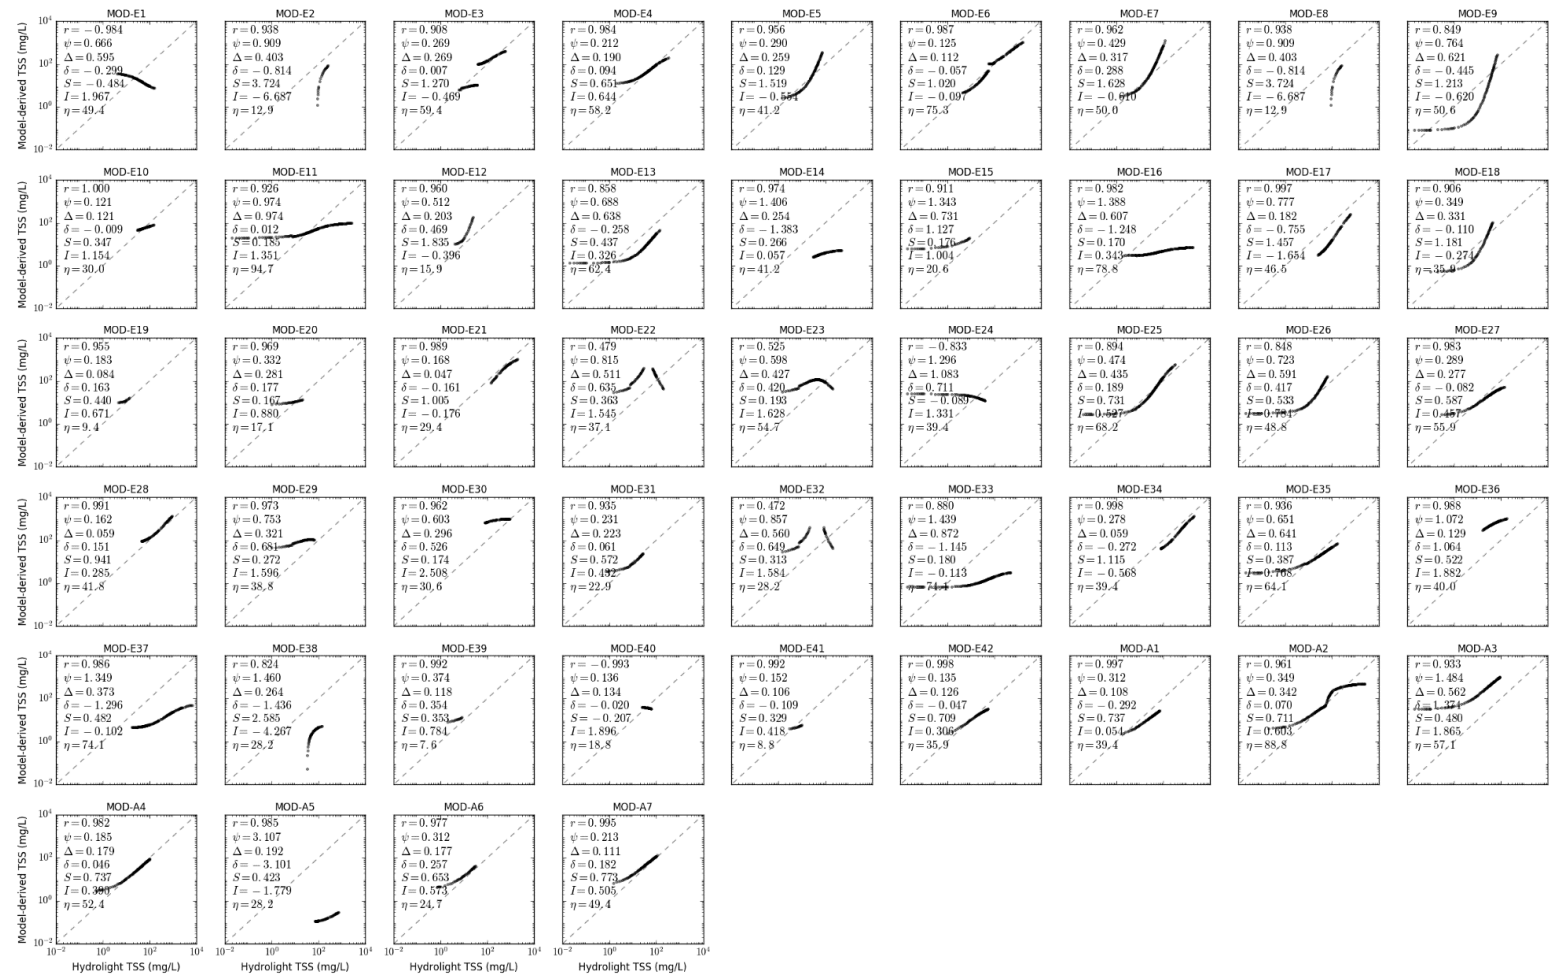

Figure S3.8. Scatter plot of MODIS TSS models in CLASS-III water for calcareous sand sediment,  $b_b/b$  ratio of 0.05, solar zenith angle of 30°.

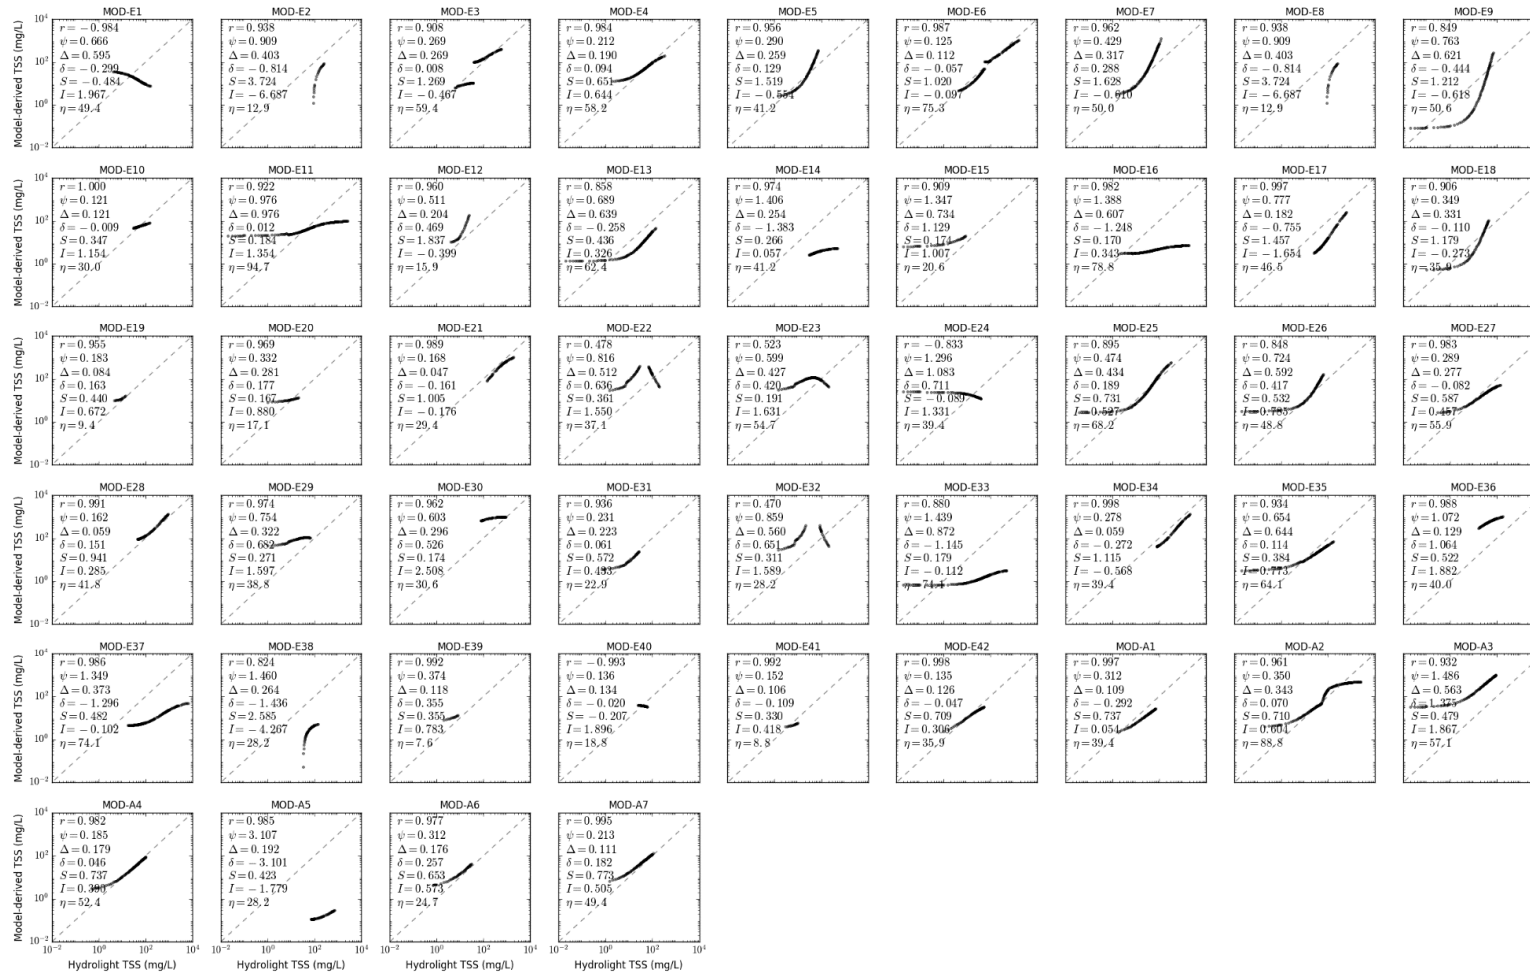

**Figure S3.9.** Scatter plot of MODIS TSS models in CLASS-III water for calcareous sand sediment,  $b_b/b$  ratio of 0.1, solar zenith angle of 30°.

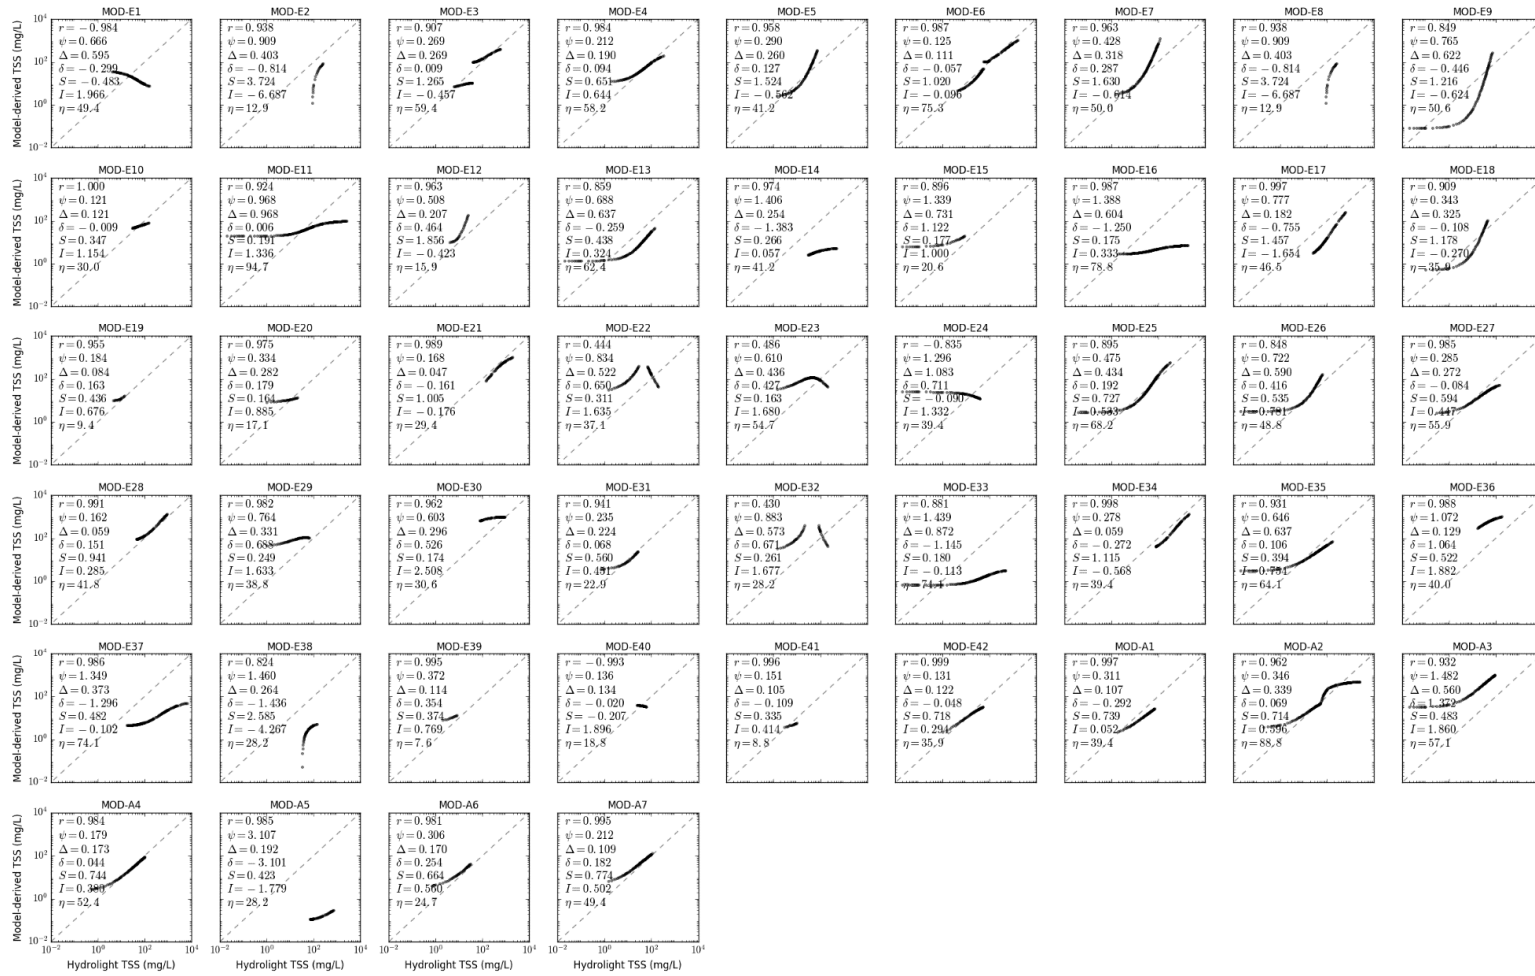

**Figure S3.10.** Scatter plot of MODIS TSS models in CLASS-III water for calcareous sand sediment,  $b_b/b$  ratio of 0.018, solar zenith angle of 15°.

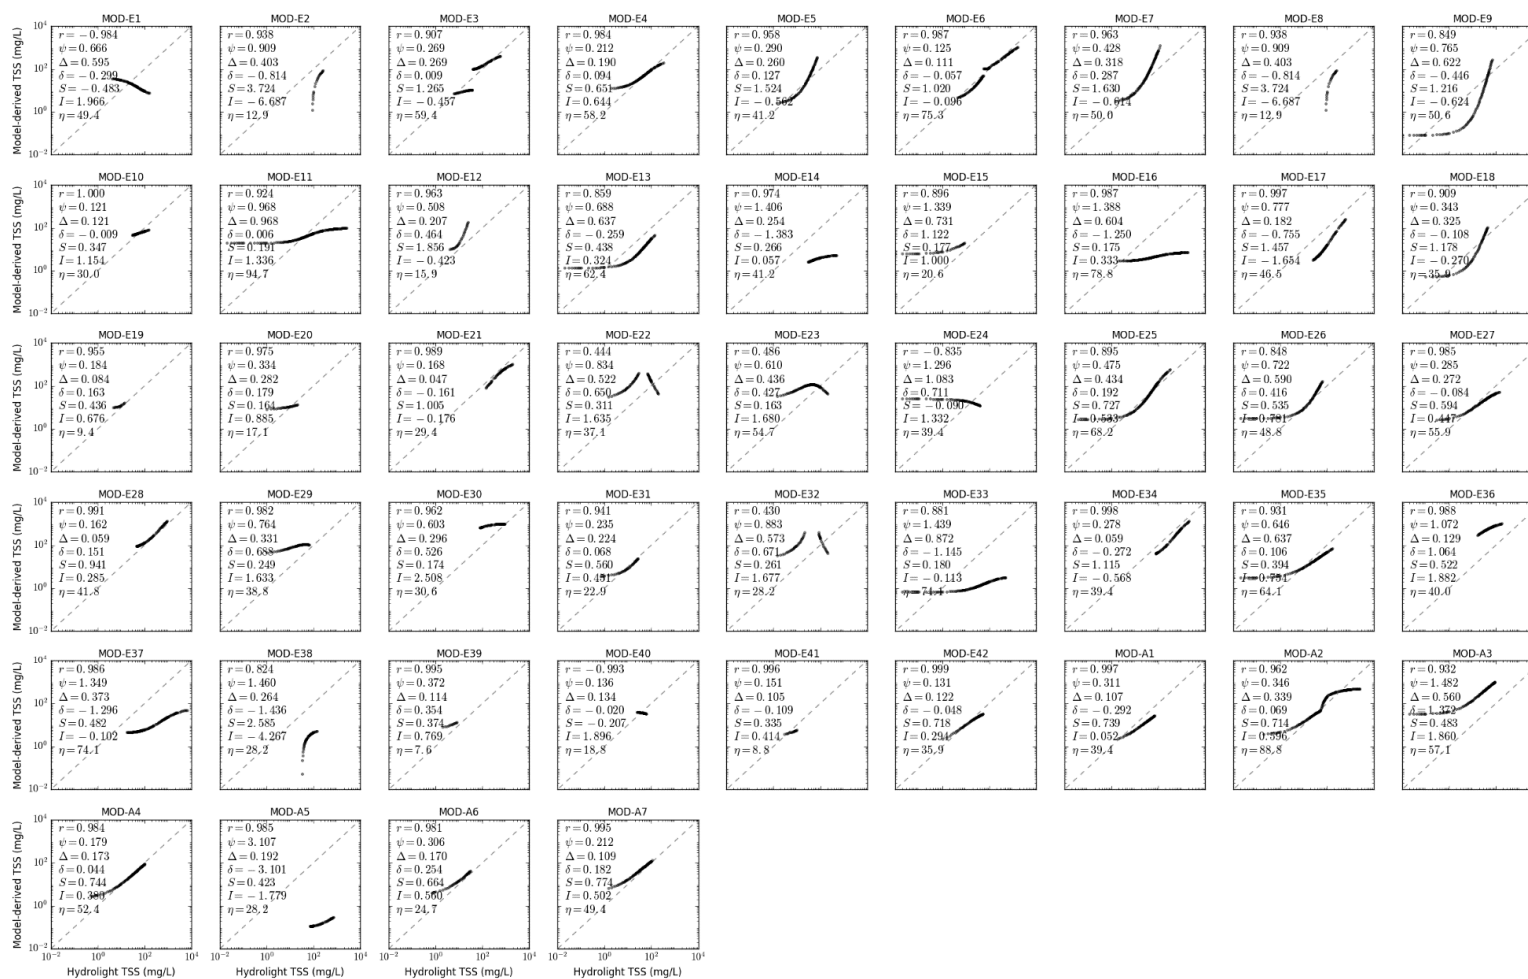

**Figure S3.11.** Scatter plot of MODIS TSS models in CLASS-III water for calcareous sand sediment,  $b_b/b$  ratio of 0.018, solar zenith angle of 45°.

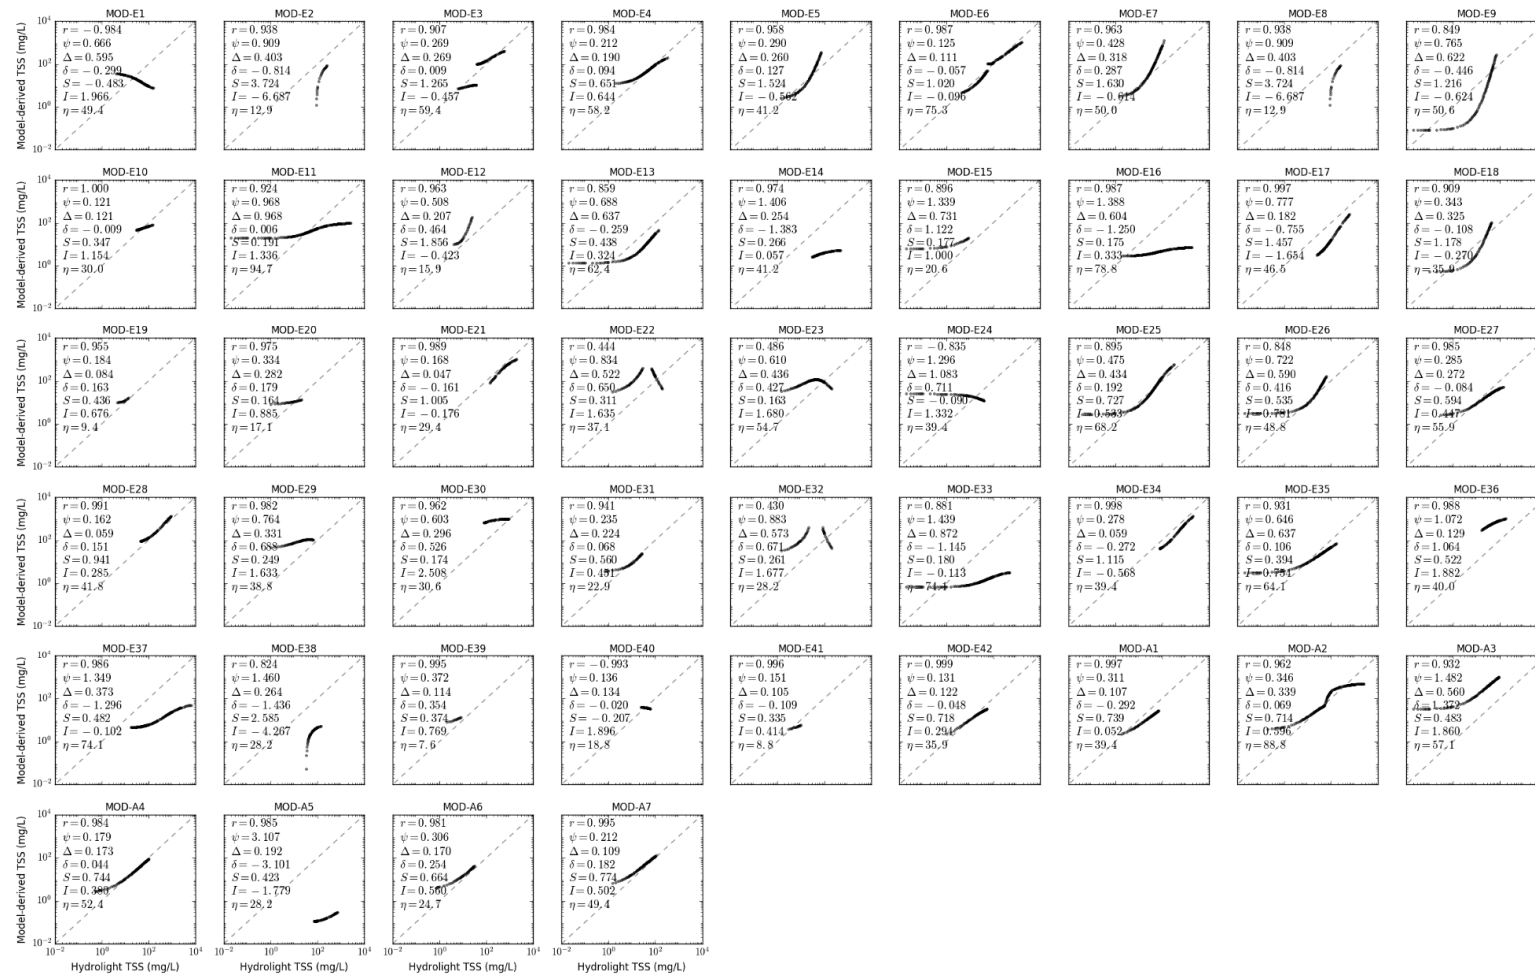

Figure S3.12. Scatter plot of MODIS TSS models in CLASS-III water for calcareous sand sediment,  $b_b/b$  ratio of 0.018, solar zenith angle of  $60^\circ$ .



## Supplementary Materials S4. Scatter Plot of MODIS TSS Models for CLASS-IV Water

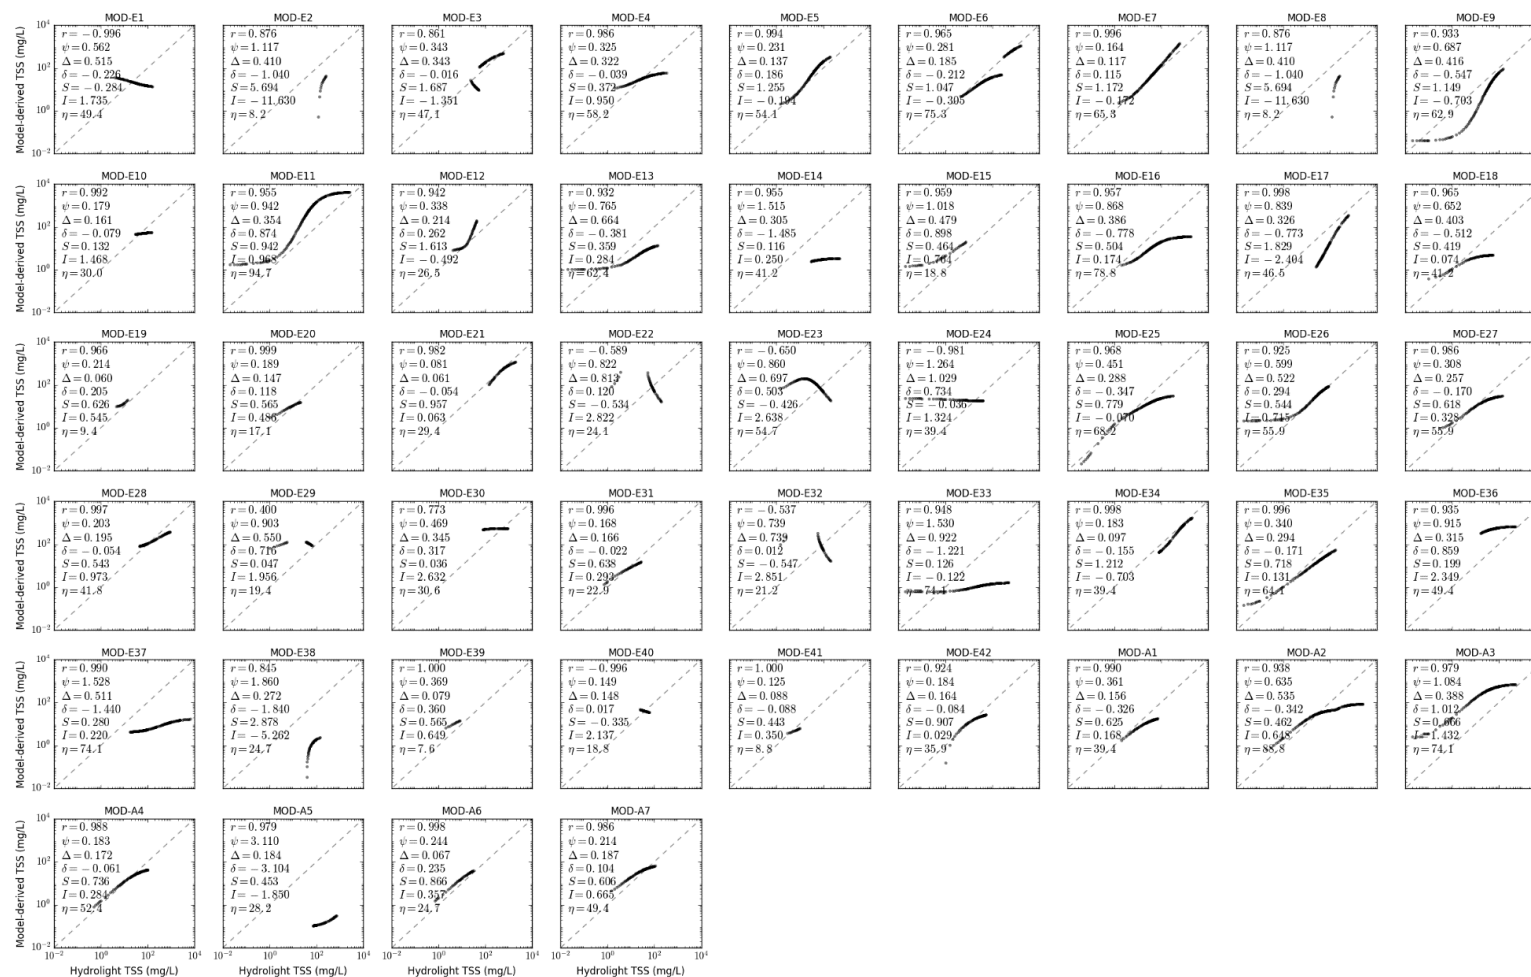

**Figure S4.1.** Scatter plot of MODIS TSS models in CLASS-IV water for brown earth sediment,  $b_b/b$  ratio of 0.018, solar zenith angle of 30°.

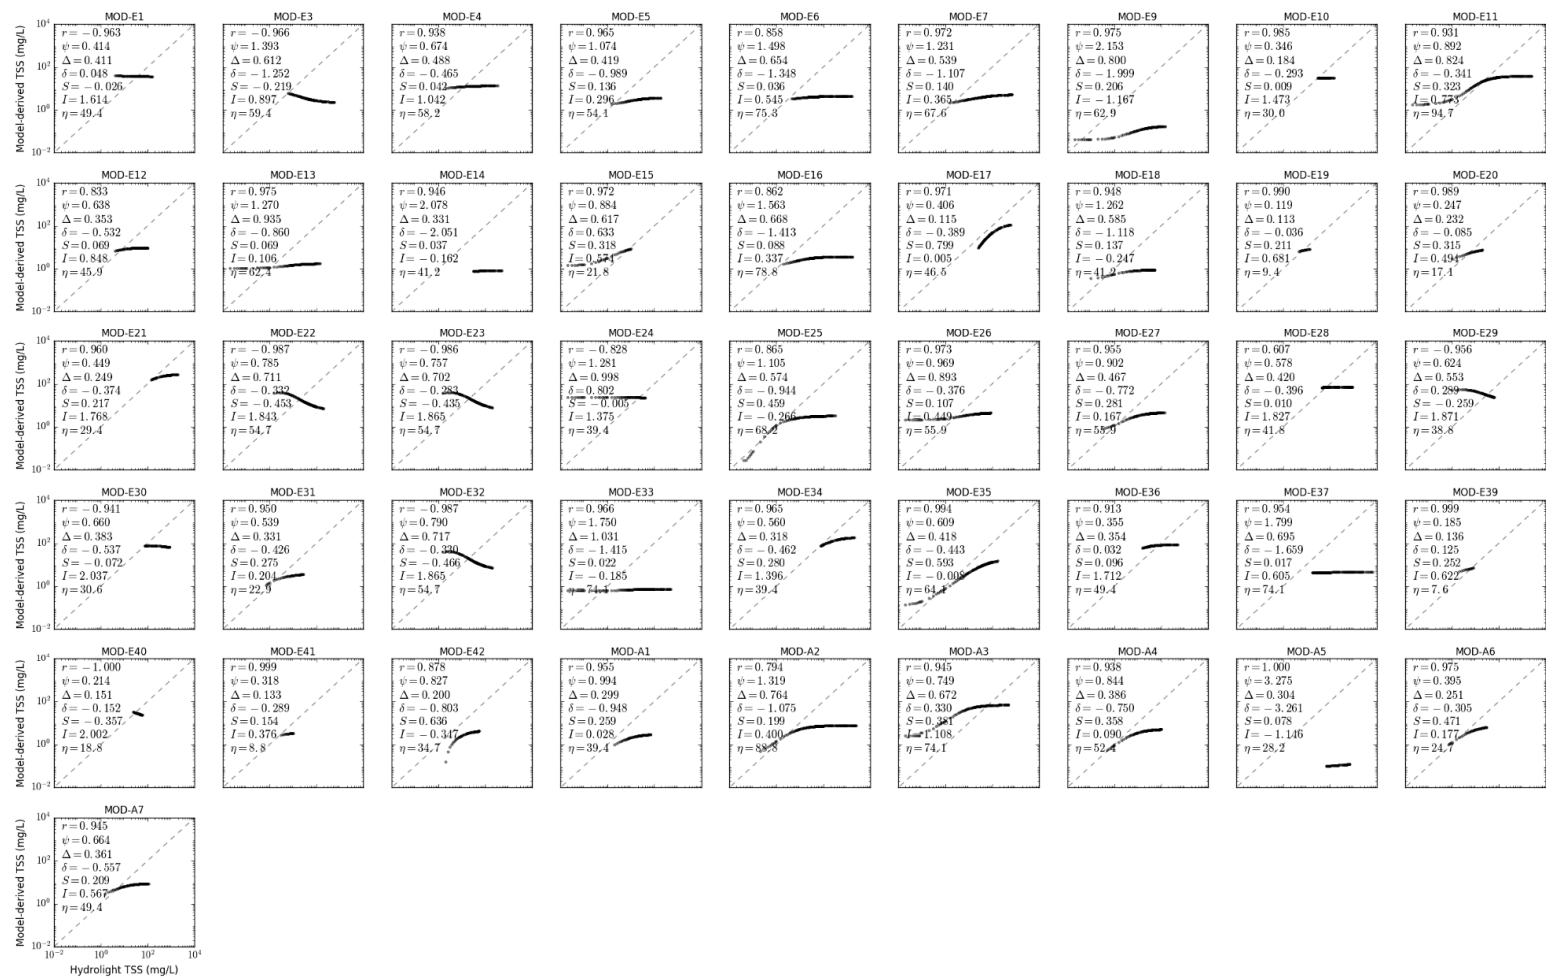

Figure S4.2. Scatter plot of MODIS TSS models in CLASS-IV water for bukata sediment,  $b_b/b$  ratio of 0.018, solar zenith angle of 30°.

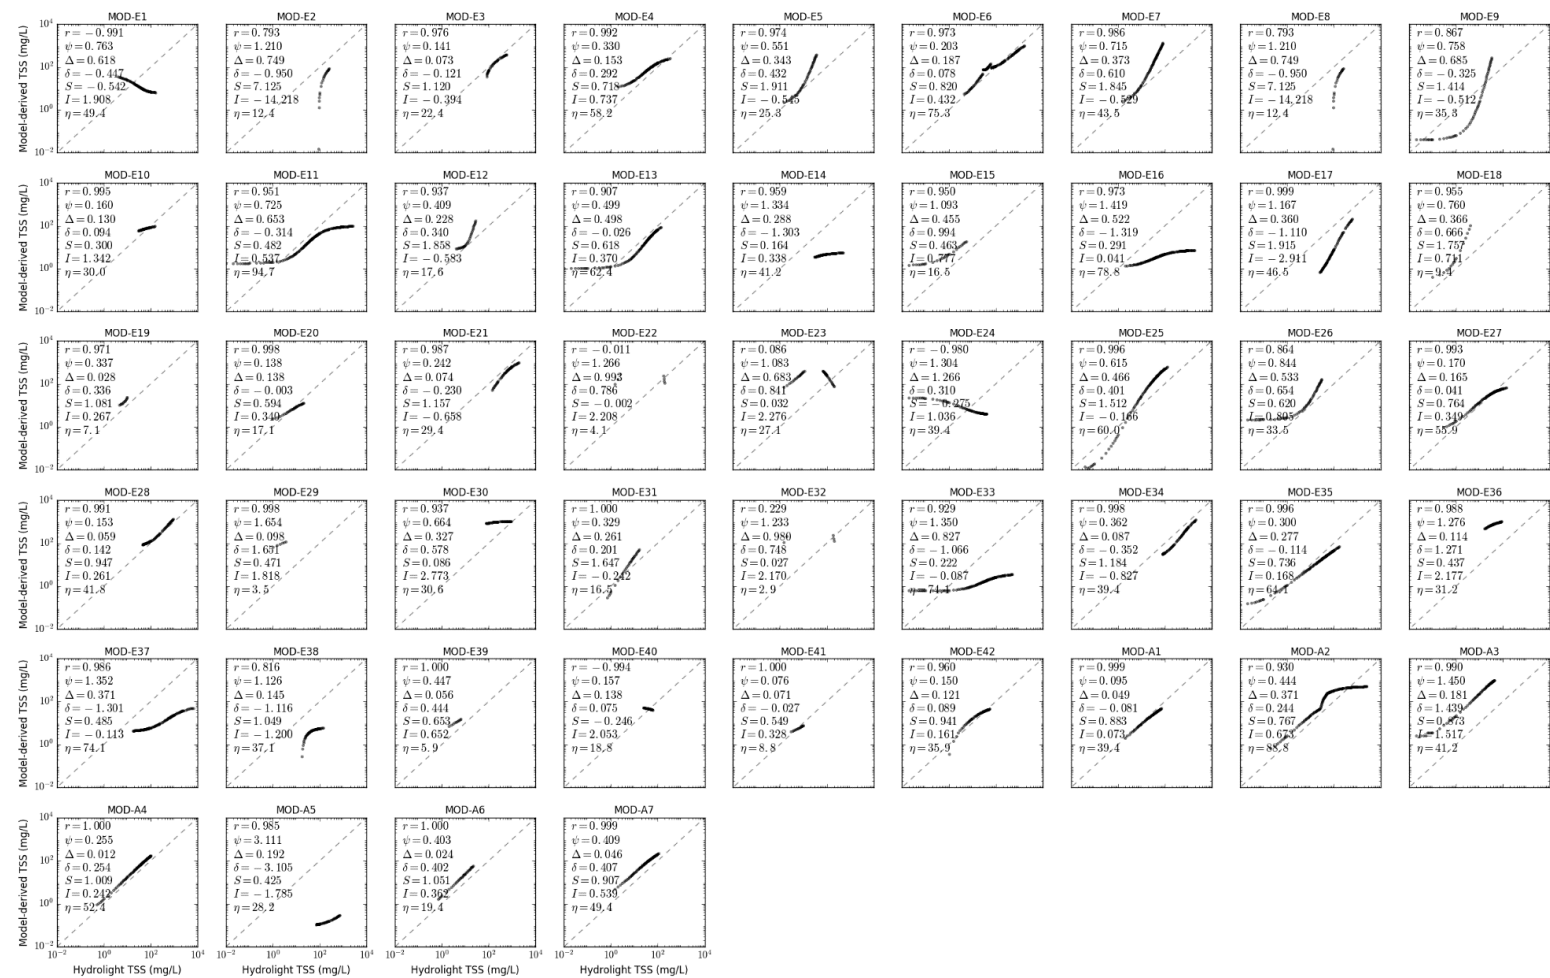

Figure S4.3. Scatter plot of MODIS TSS models in CLASS-IV water for calcareous sand sediment,  $b_b/b$  ratio of 0.018, solar zenith angle of 30°.

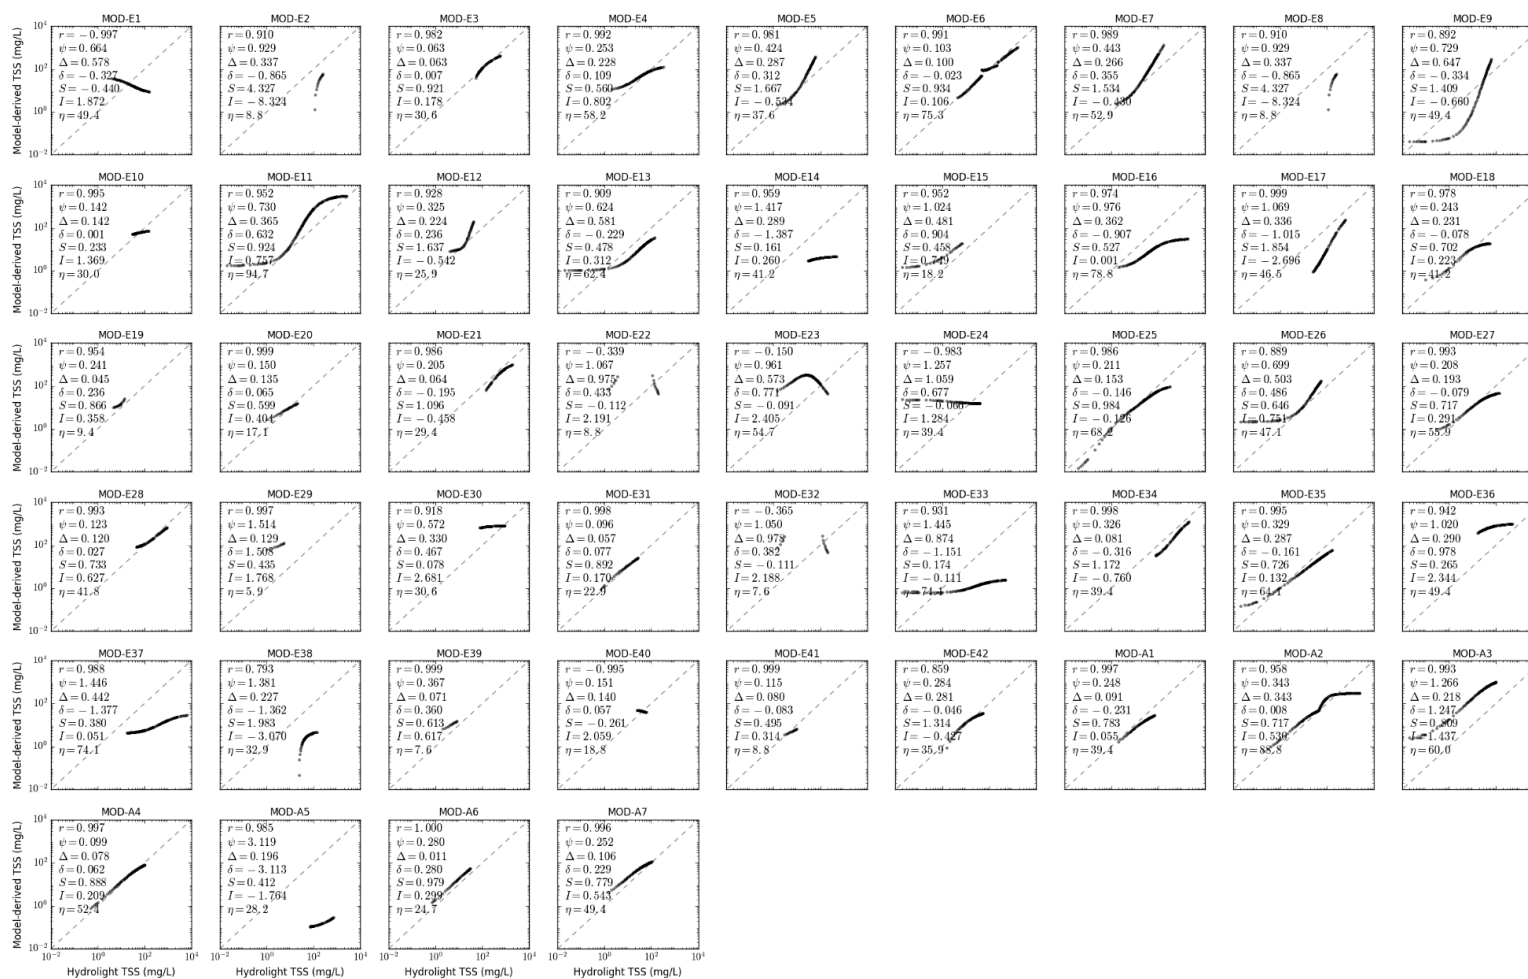

**Figure S4.4.** Scatter plot of MODIS TSS models in CLASS-IV water for red clay sediment,  $b_b/b$  ratio of 0.018, solar zenith angle of  $30^\circ$ .

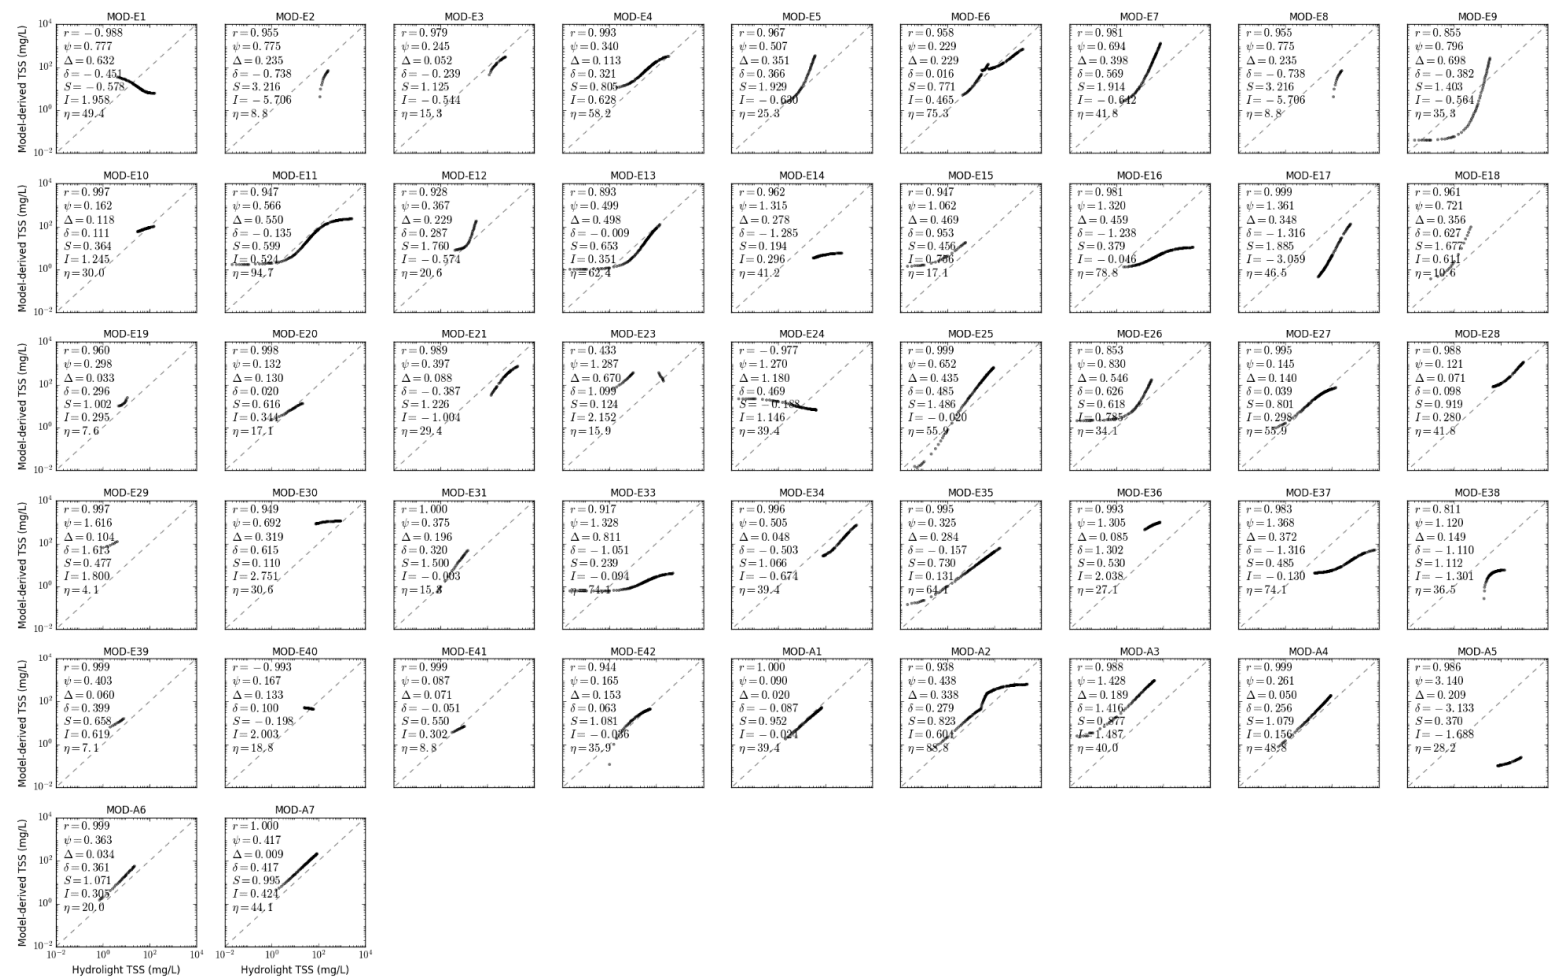

Figure S4.5. Scatter plot of MODIS TSS models in CLASS-IV water for yellow clay sediment,  $b_b/b$  ratio of 0.018, solar zenith angle of 30°.

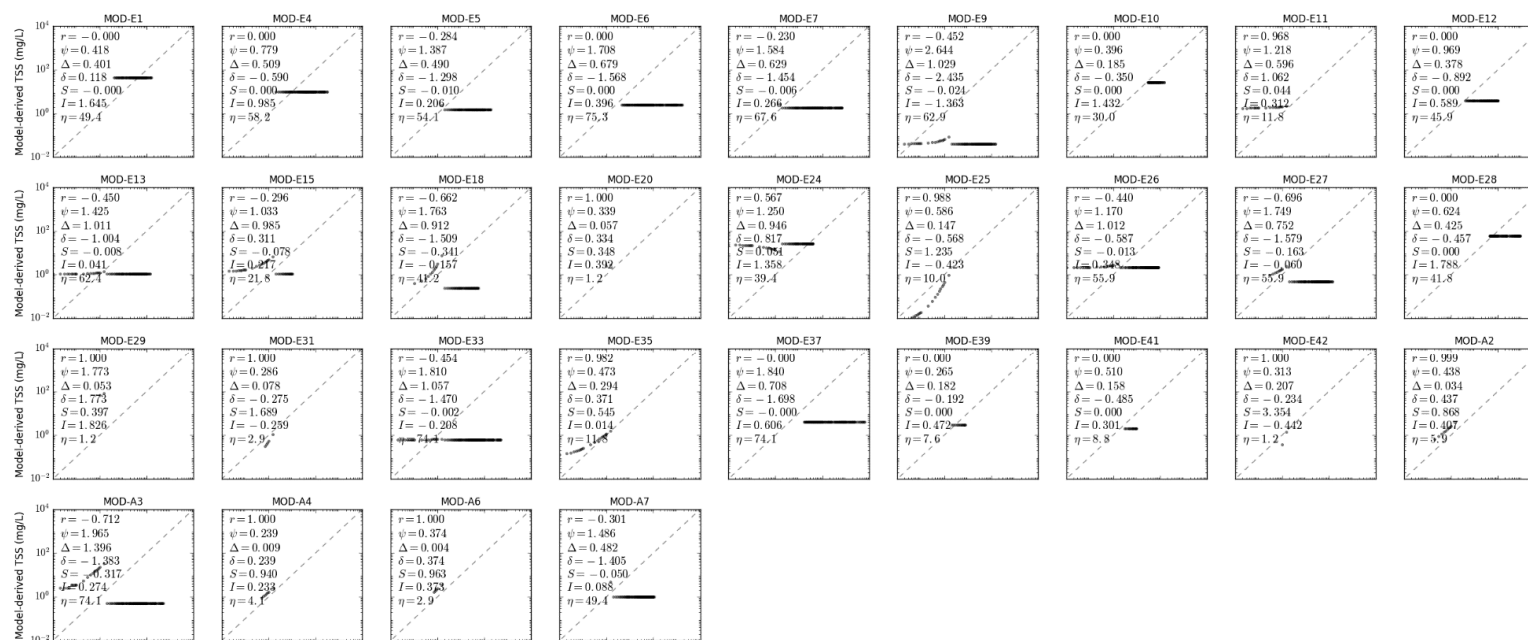

**Figure S4.6.** Scatter plot of MODIS TSS models in CLASS-IV water for calcareous sand sediment,  $b_b/b$  ratio of 0.001, solar zenith angle of  $30^\circ$ .

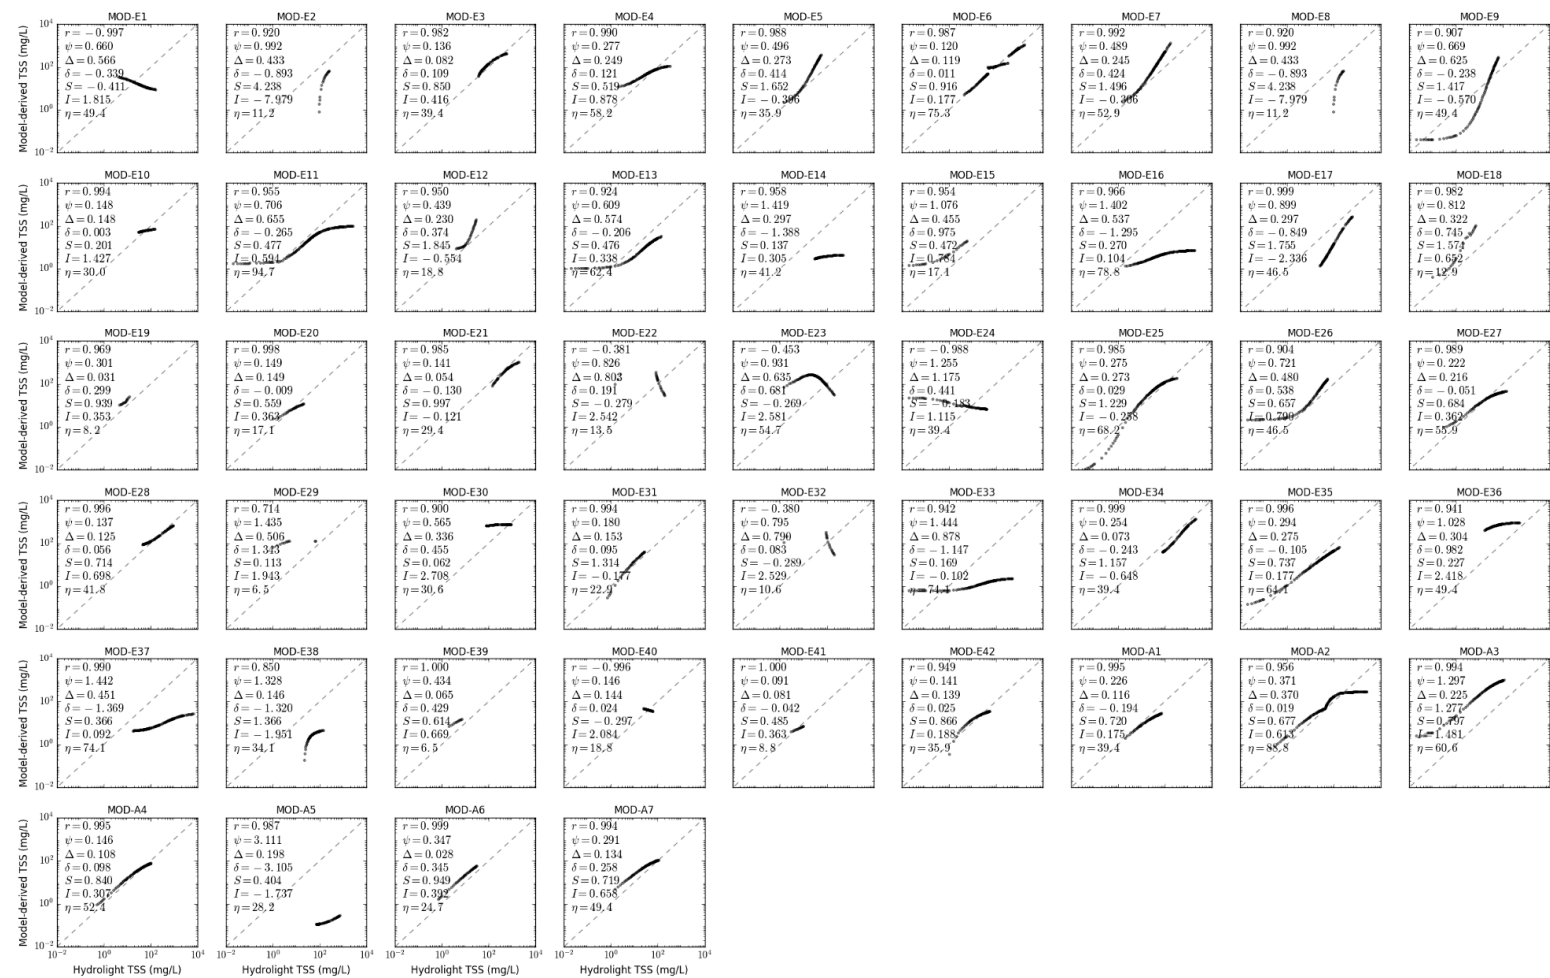

Figure S4.7. Scatter plot of MODIS TSS models in CLASS-IV water for calcareous sand sediment,  $b_b/b$  ratio of 0.01, solar zenith angle of 30°.

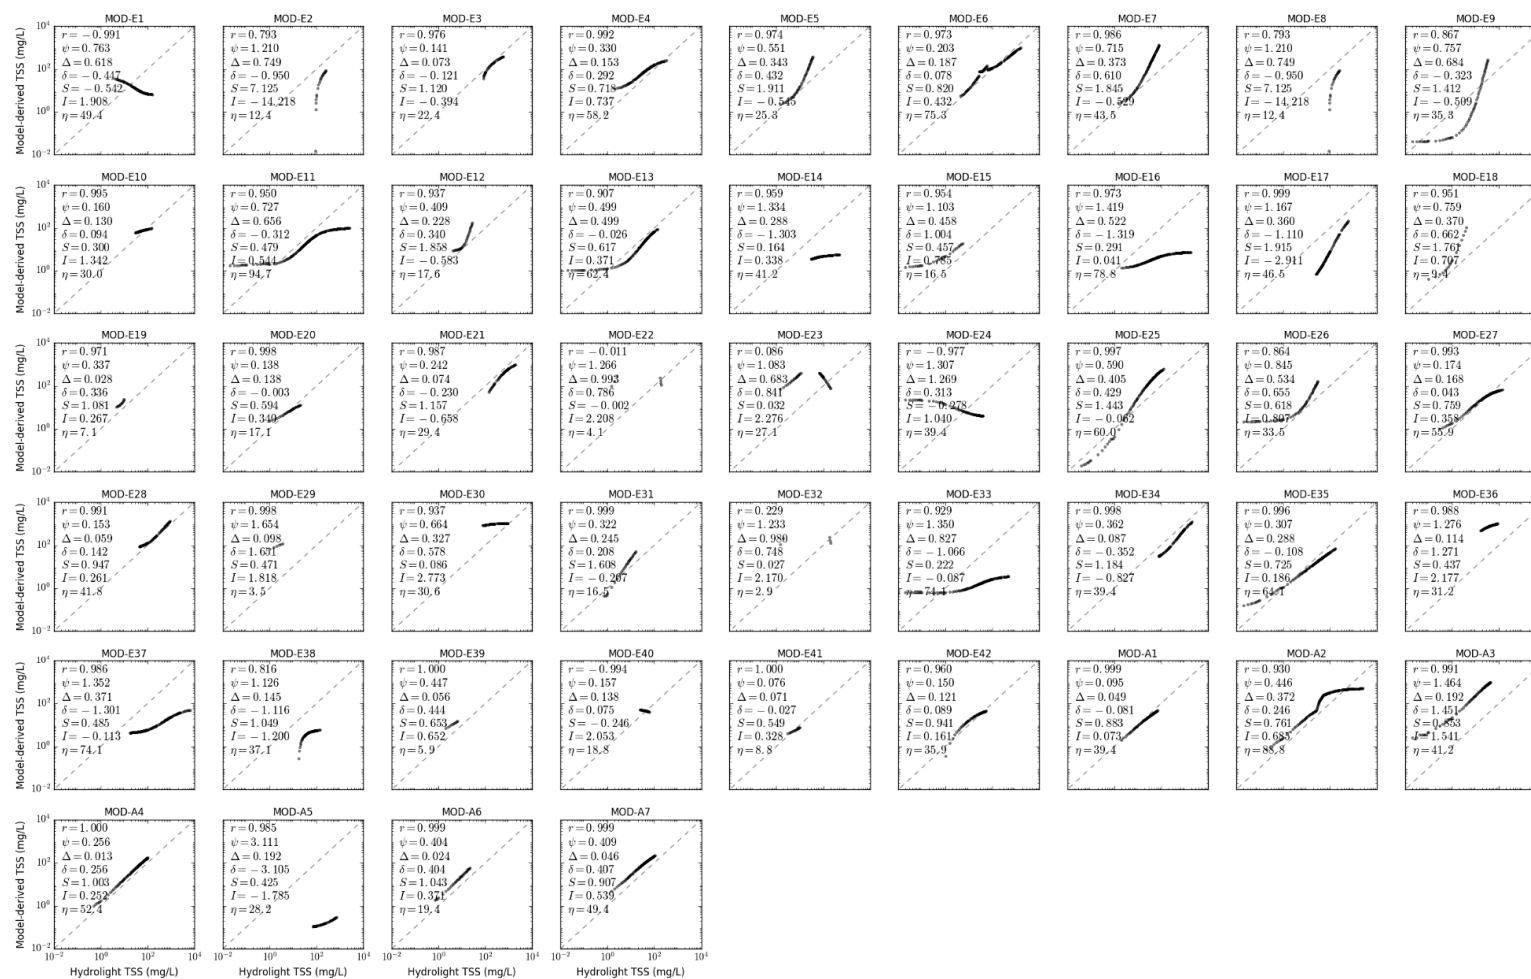

Figure S4.8. Scatter plot of MODIS TSS models in CLASS-IV water for calcareous sand sediment,  $b_b/b$  ratio of 0.05, solar zenith angle of 30°.



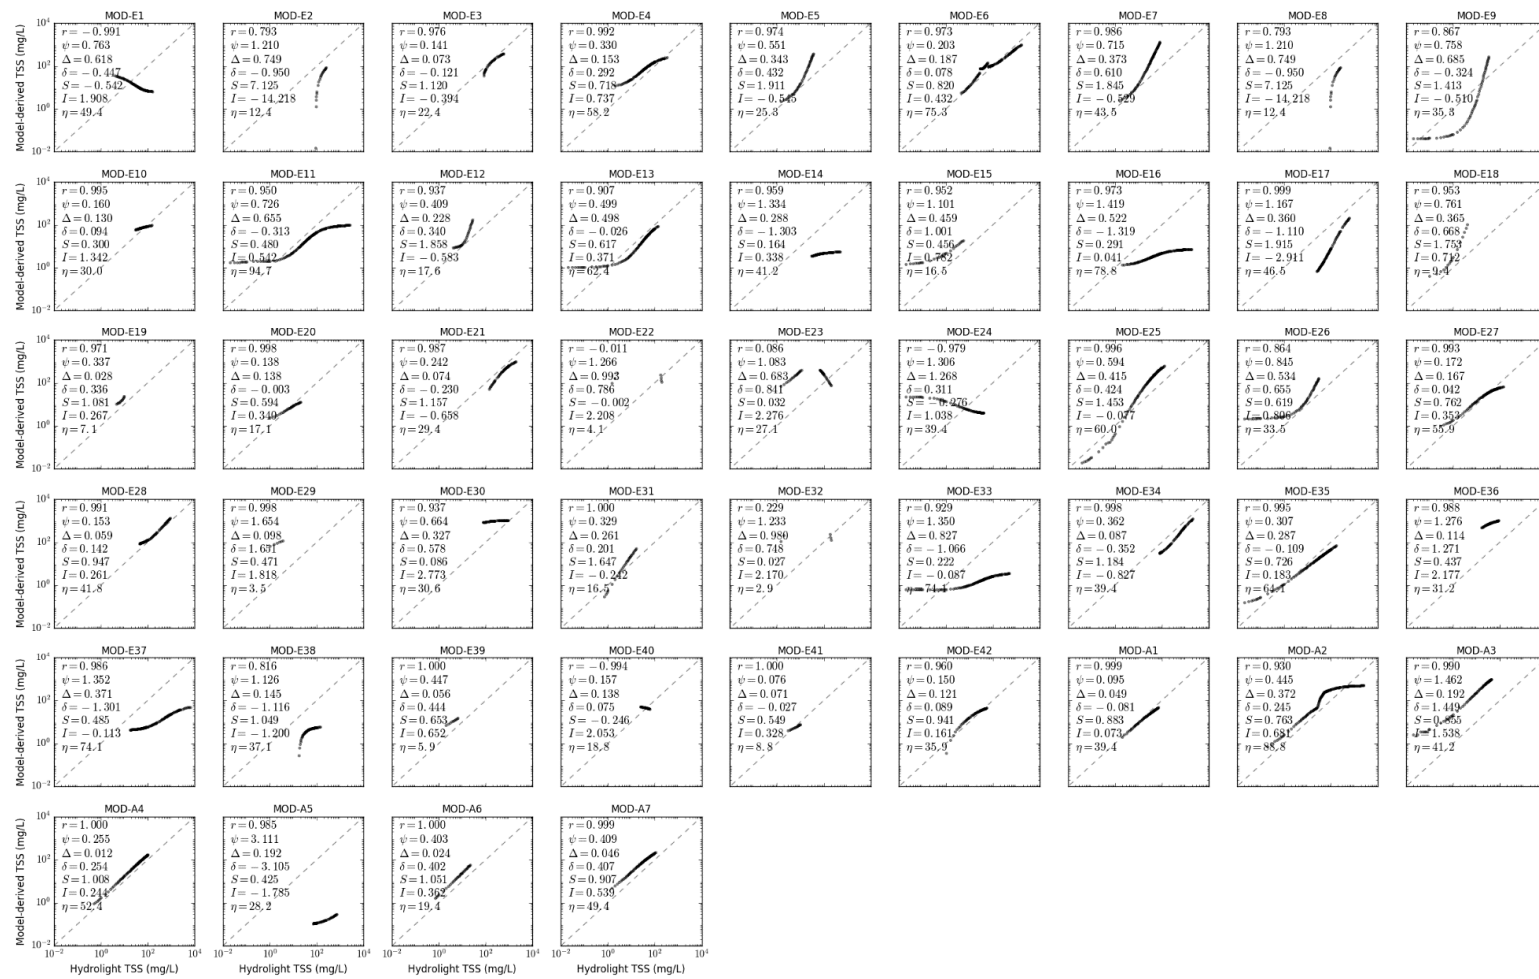

**Figure S4.9.** Scatter plot of MODIS TSS models in CLASS-IV water for calcareous sand sediment,  $b_b/b$  ratio of 0.1, solar zenith angle of  $30^\circ$ .

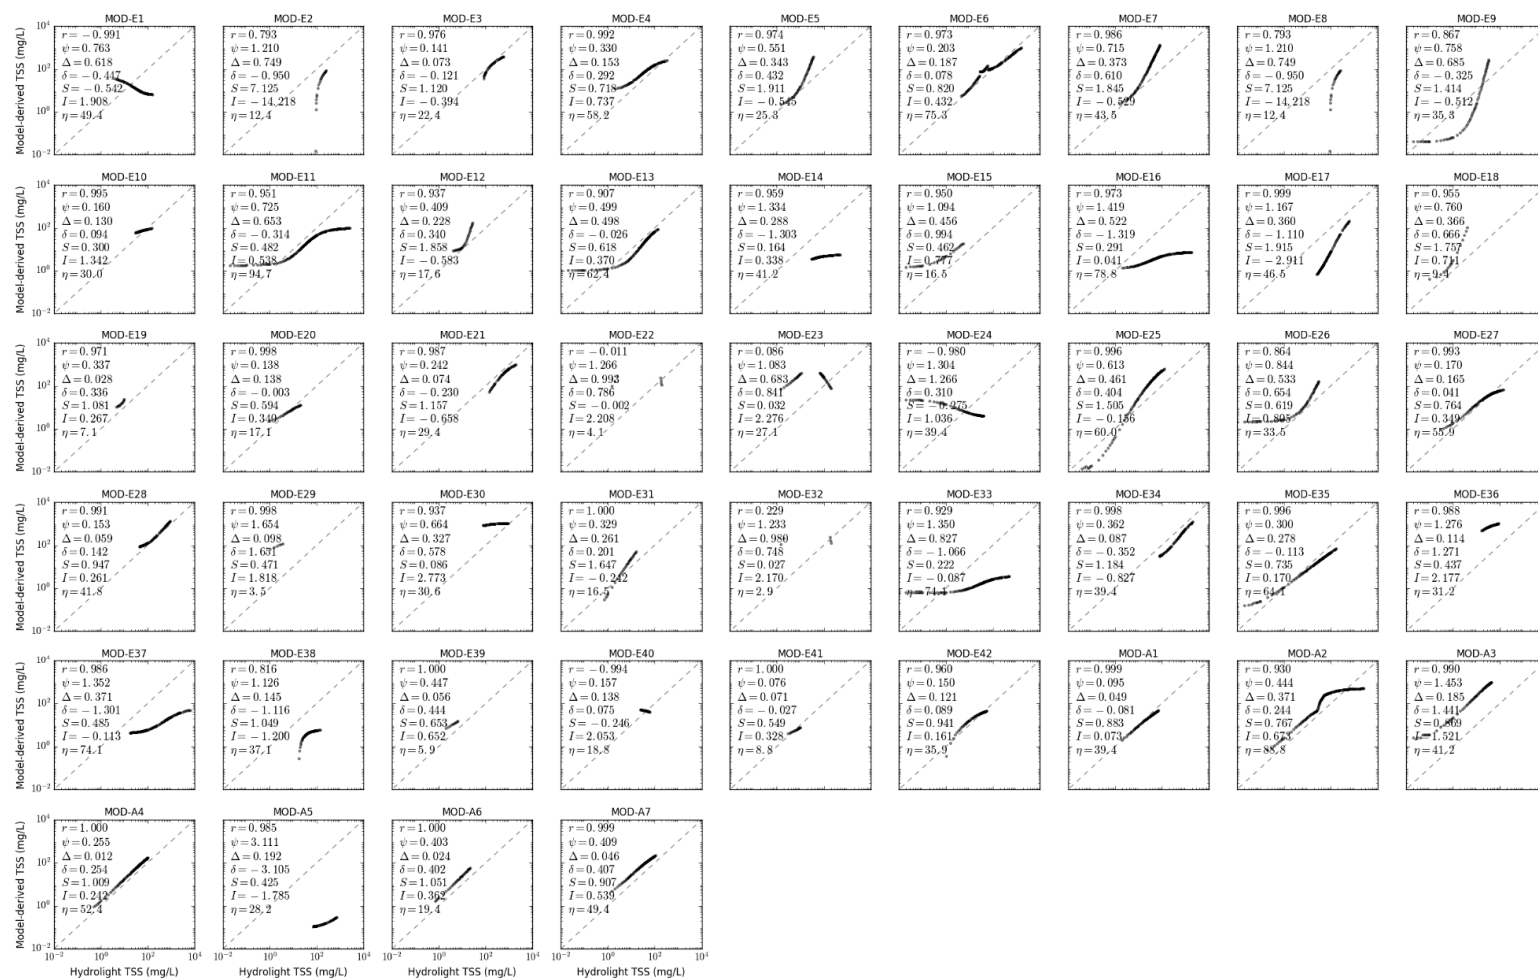

Figure S4.10. Scatter plot of MODIS TSS models in CLASS-IV water for calcareous sand sediment,  $b_b/b$  ratio of 0.018, solar zenith angle of 15°.

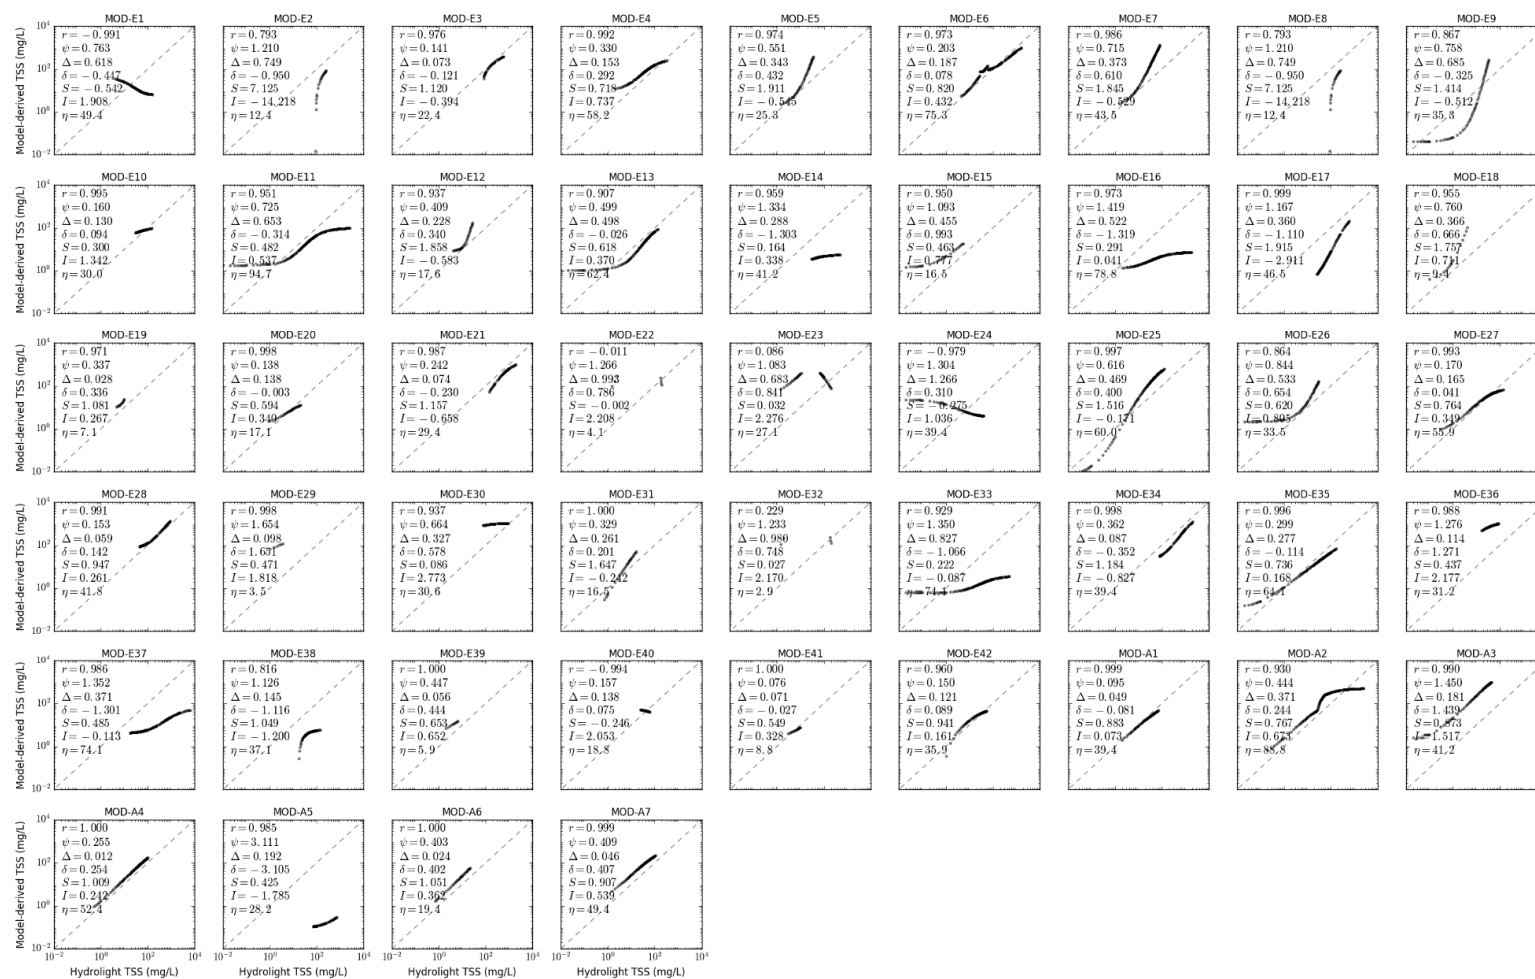

Figure S4.11. Scatter plot of MODIS TSS models in CLASS-IV water for calcareous sand sediment,  $b_b/b$  ratio of 0.018, solar zenith angle of  $45^\circ$ .

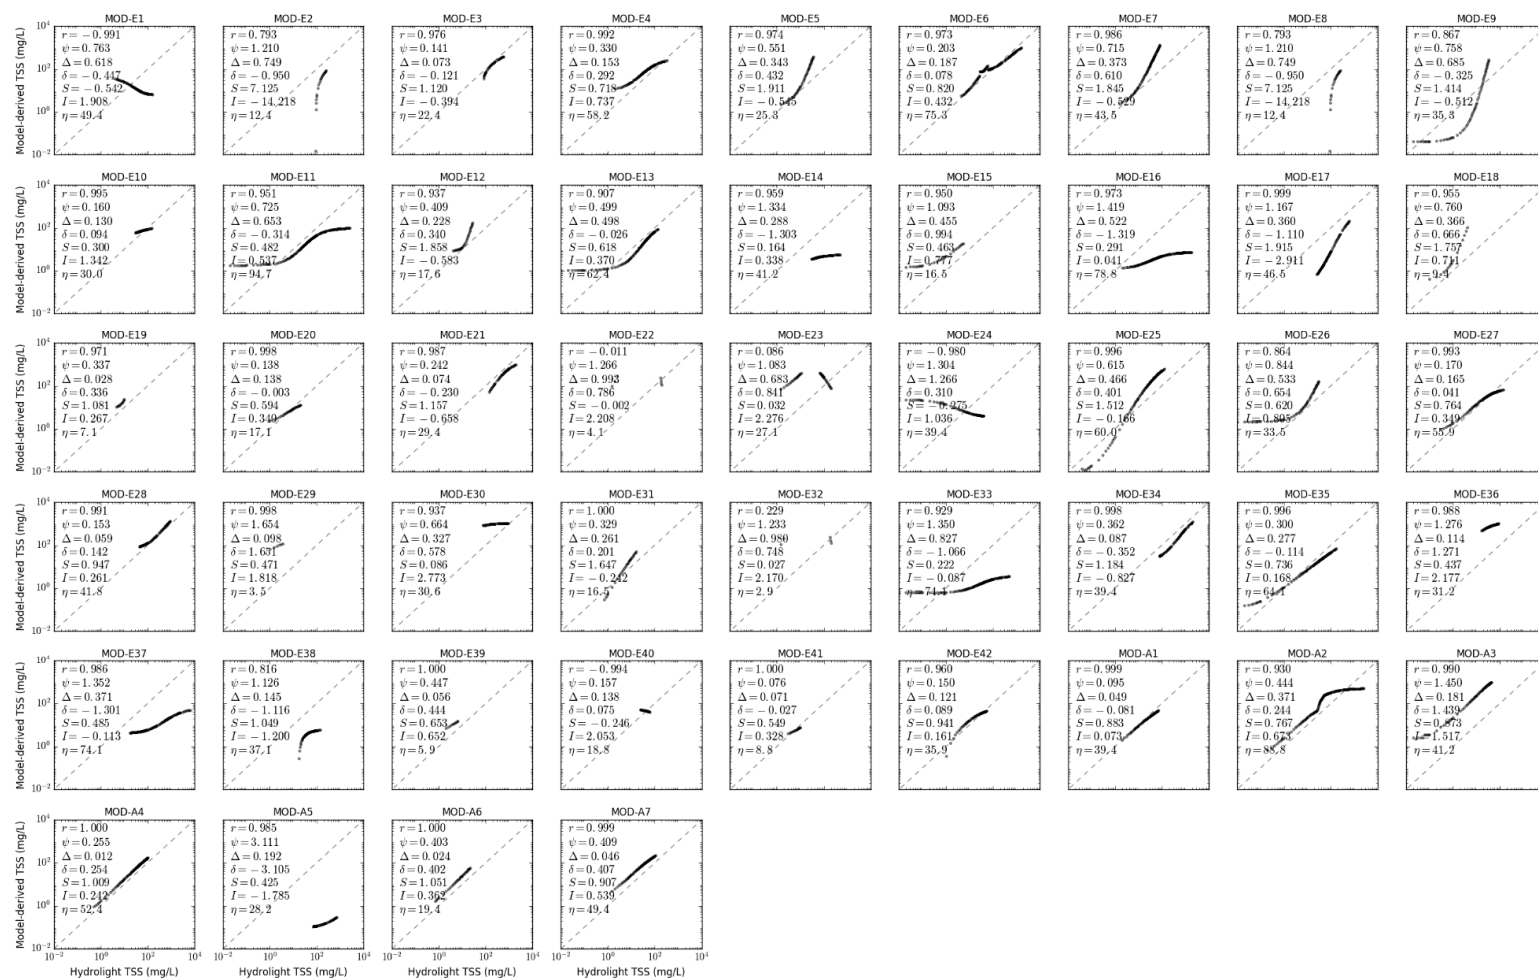

Figure S4.12. Scatter plot of MODIS TSS models in CLASS-IV water for calcareous sand sediment,  $b_b/b$  ratio of 0.018, solar zenith angle of  $60^\circ$ .

## Supplementary Materials S5. Scatter Plot of MODIS TSS Models for CLASS-V Water

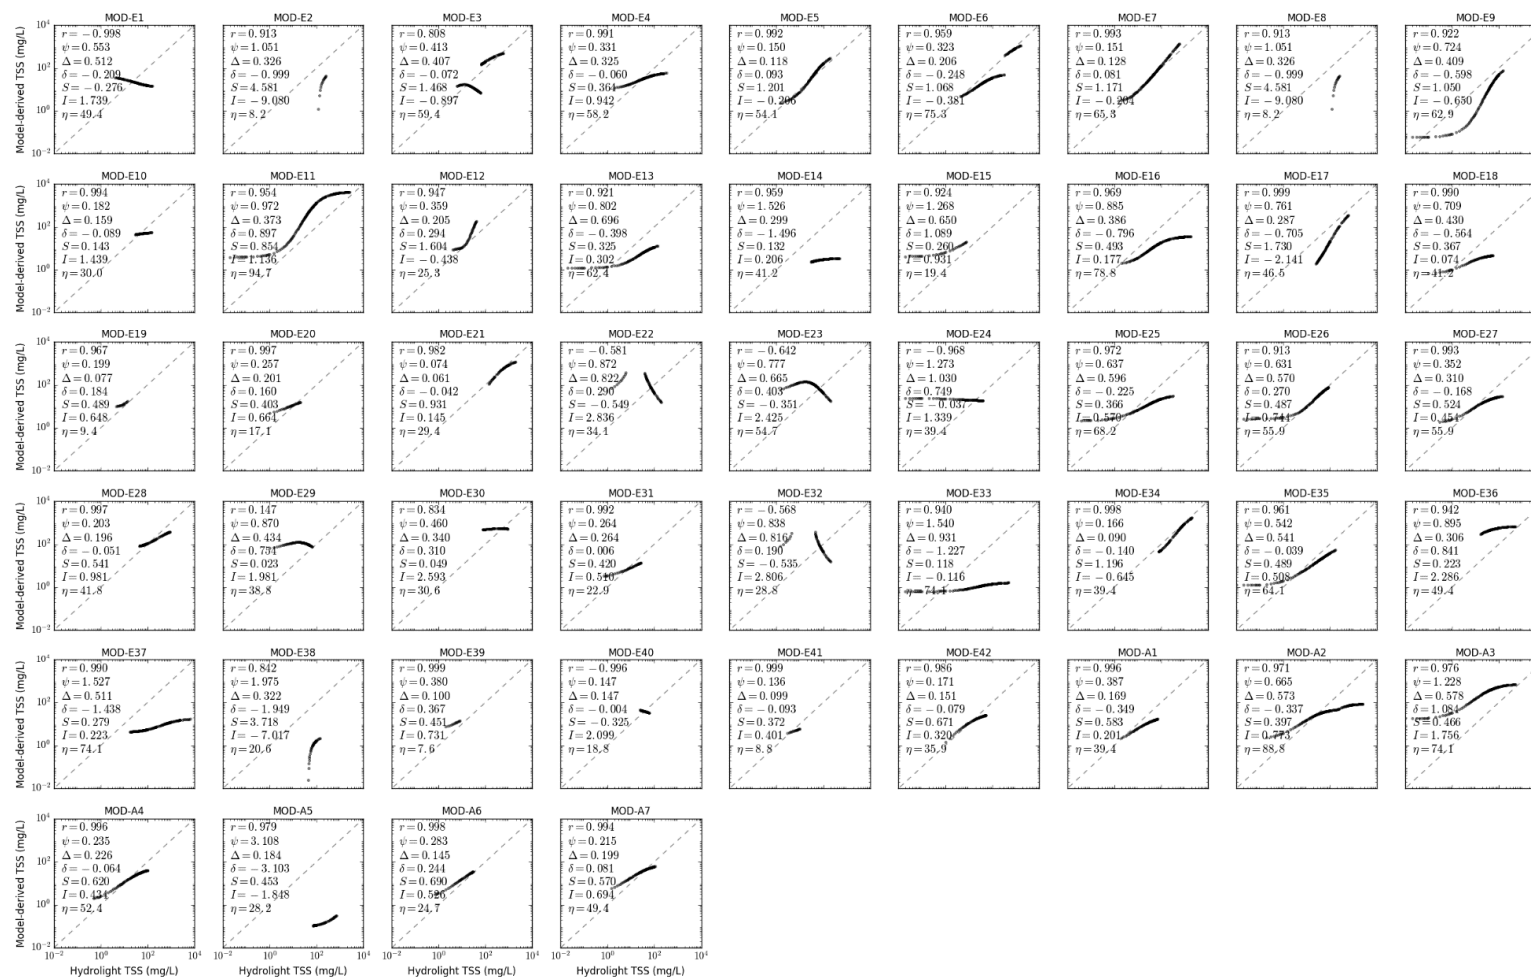

**Figure S5.1.** Scatter plot of MODIS TSS models in CLASS-V water for brown earth sediment,  $b_b/b$  ratio of 0.018, solar zenith angle of  $30^\circ$ .

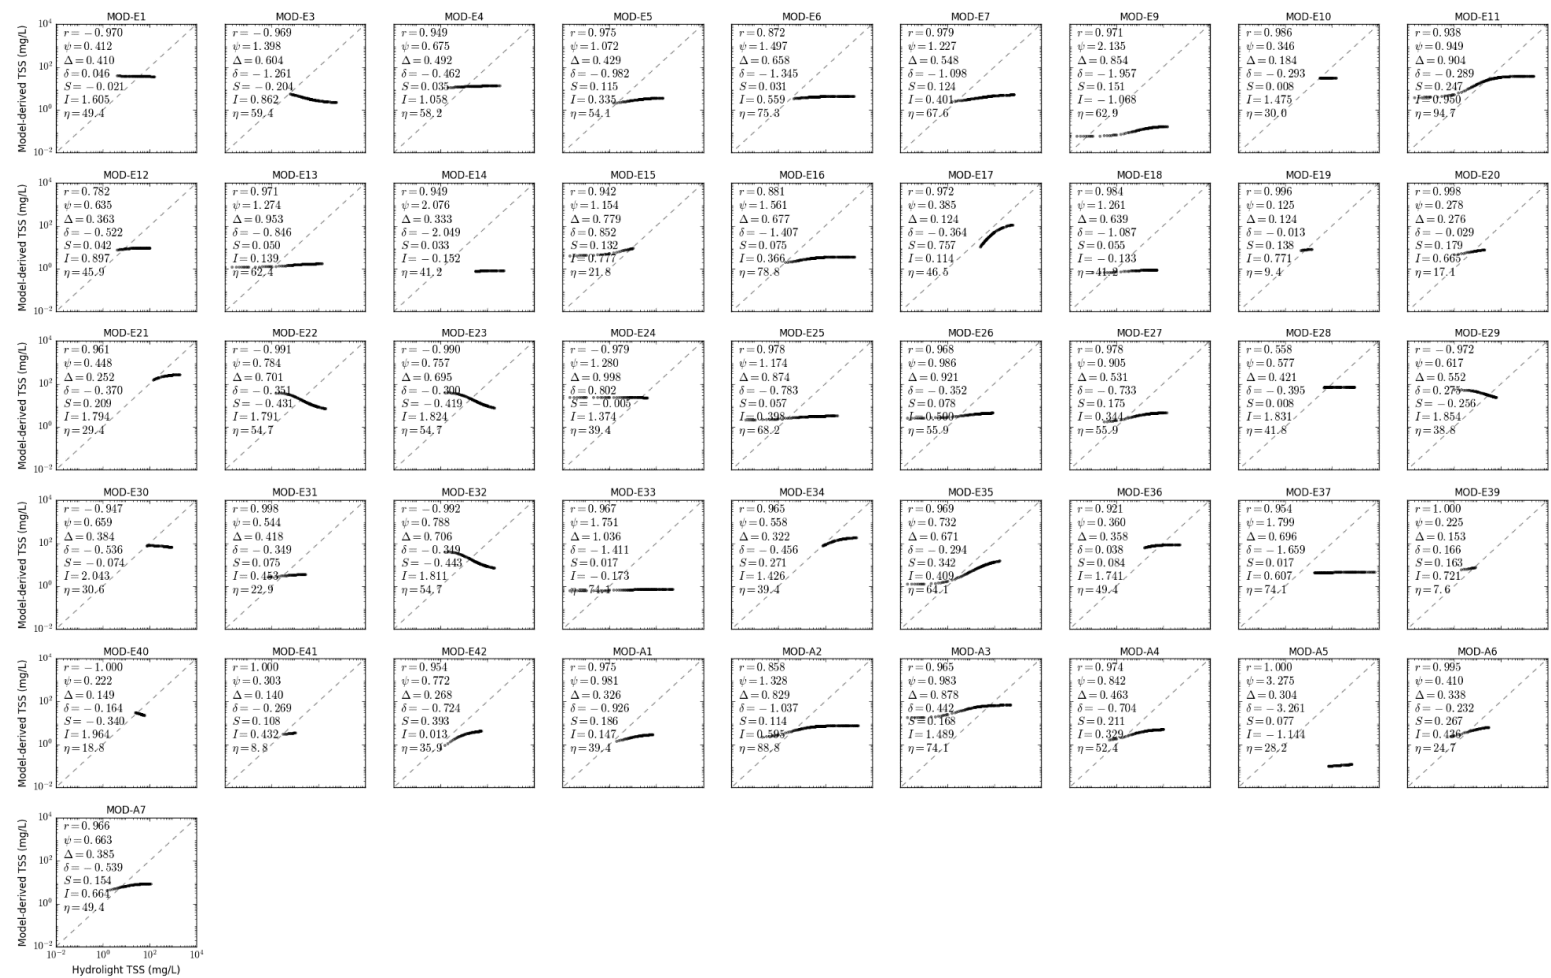

Figure S5.2. Scatter plot of MODIS TSS models in CLASS-V water for bukata sediment,  $b_b/b$  ratio of 0.018, solar zenith angle of 30°.

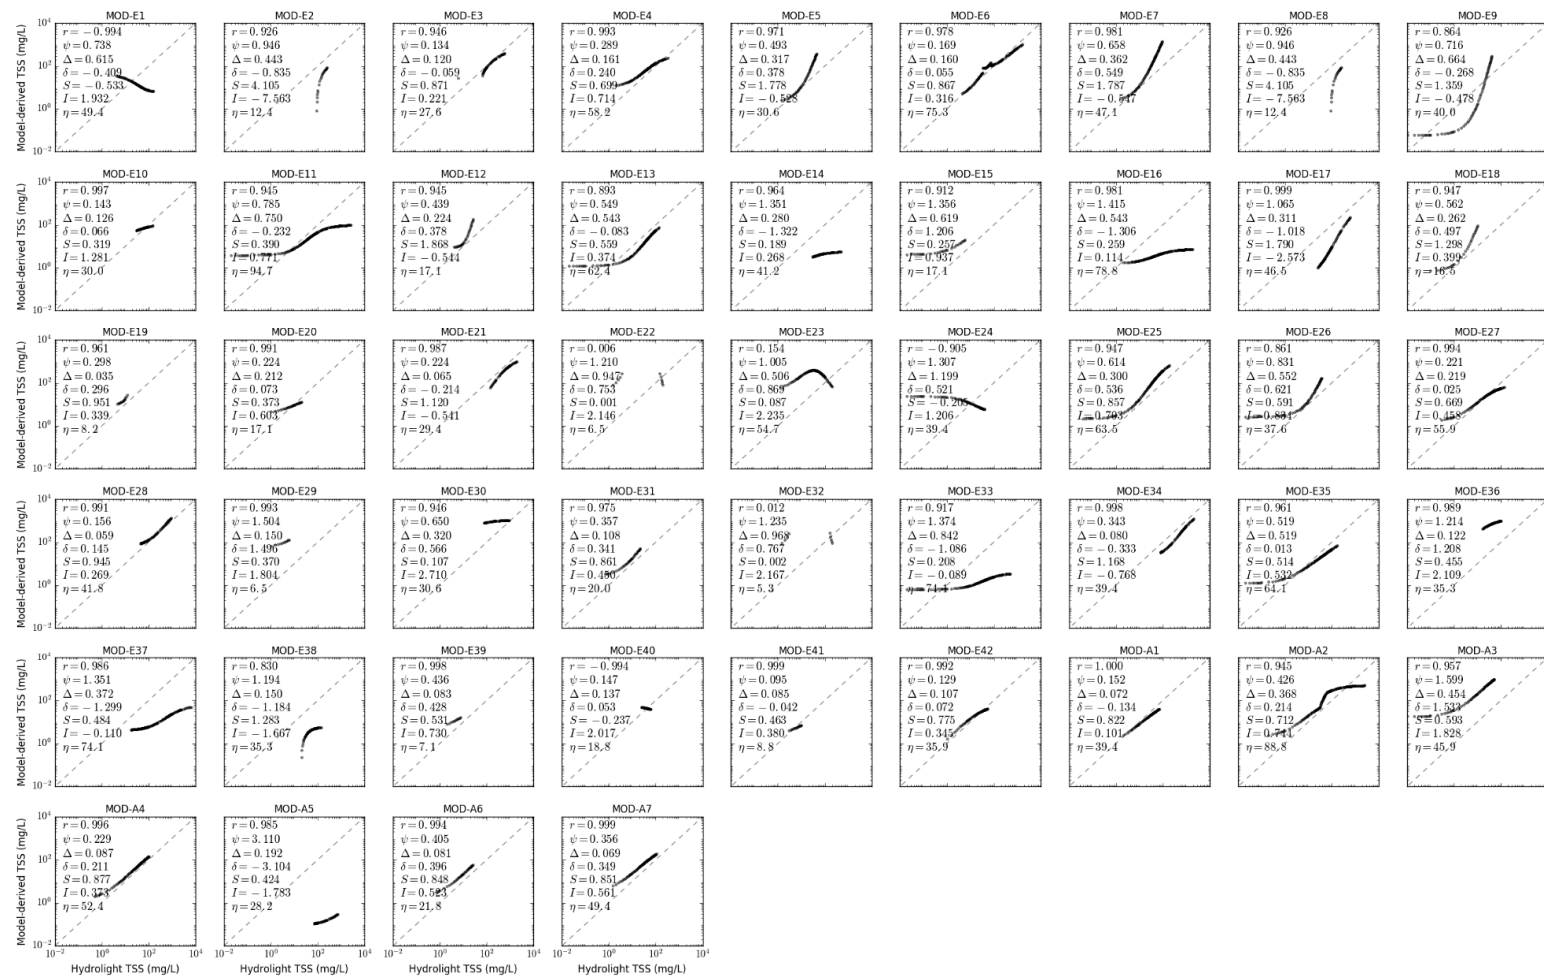

**Figure S5.3.** Scatter plot of MODIS TSS models in CLASS-V water for calcareous sand sediment,  $b_b/b$  ratio of 0.018, solar zenith angle of 30°.

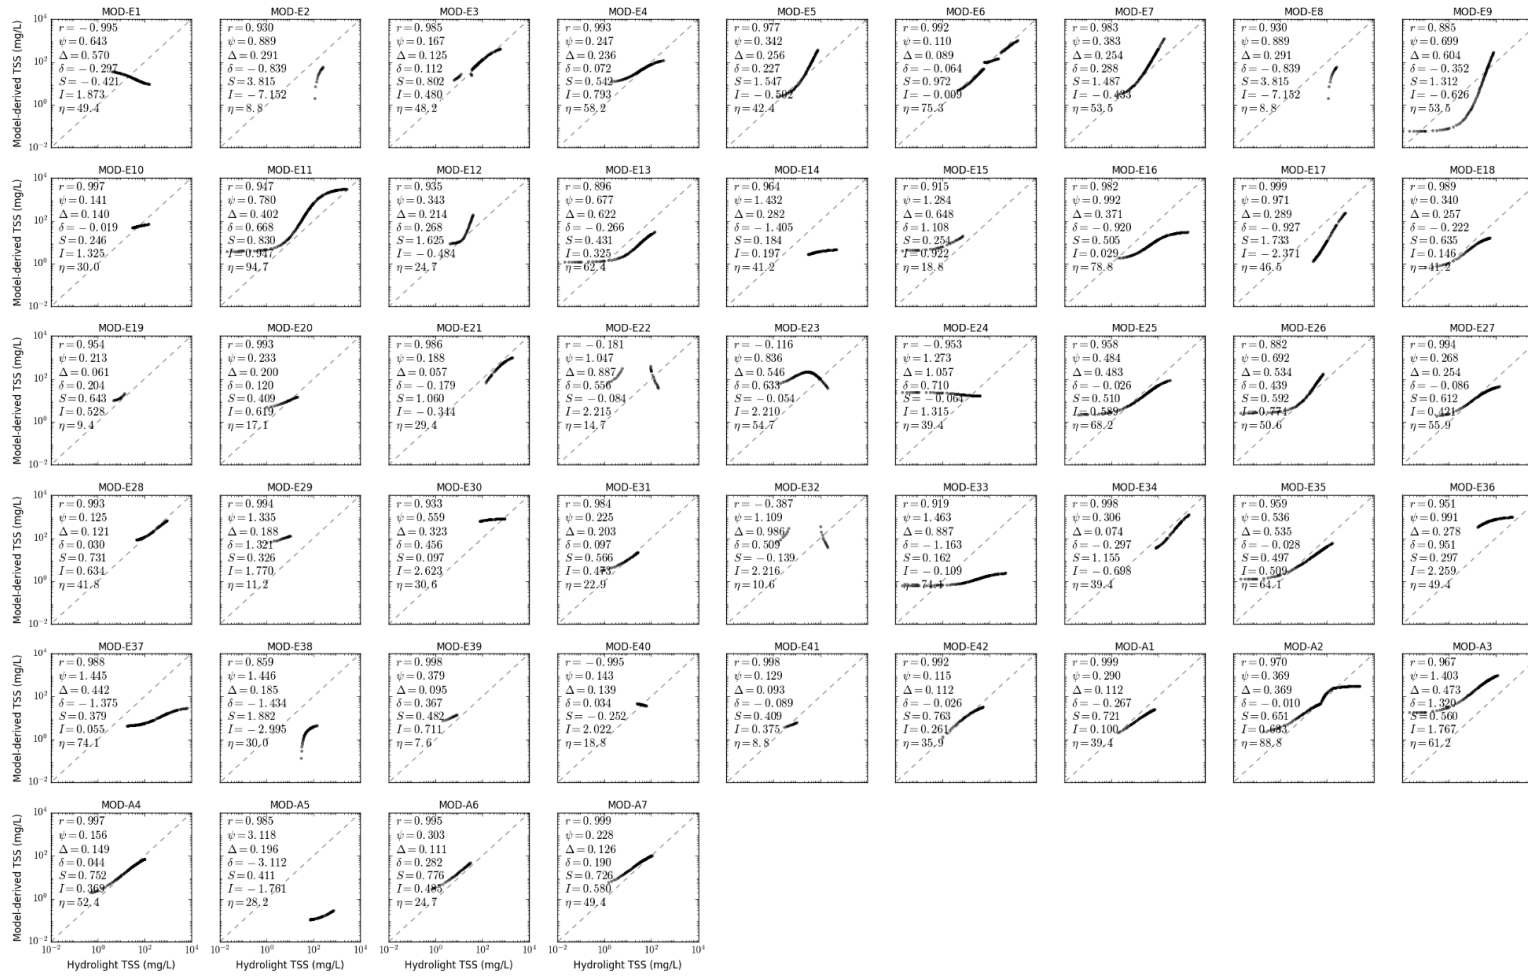

**Figure S5.4.** Scatter plot of MODIS TSS models in CLASS-V water for red clay sediment,  $b_b/b$  ratio of 0.018, solar zenith angle of 30°.



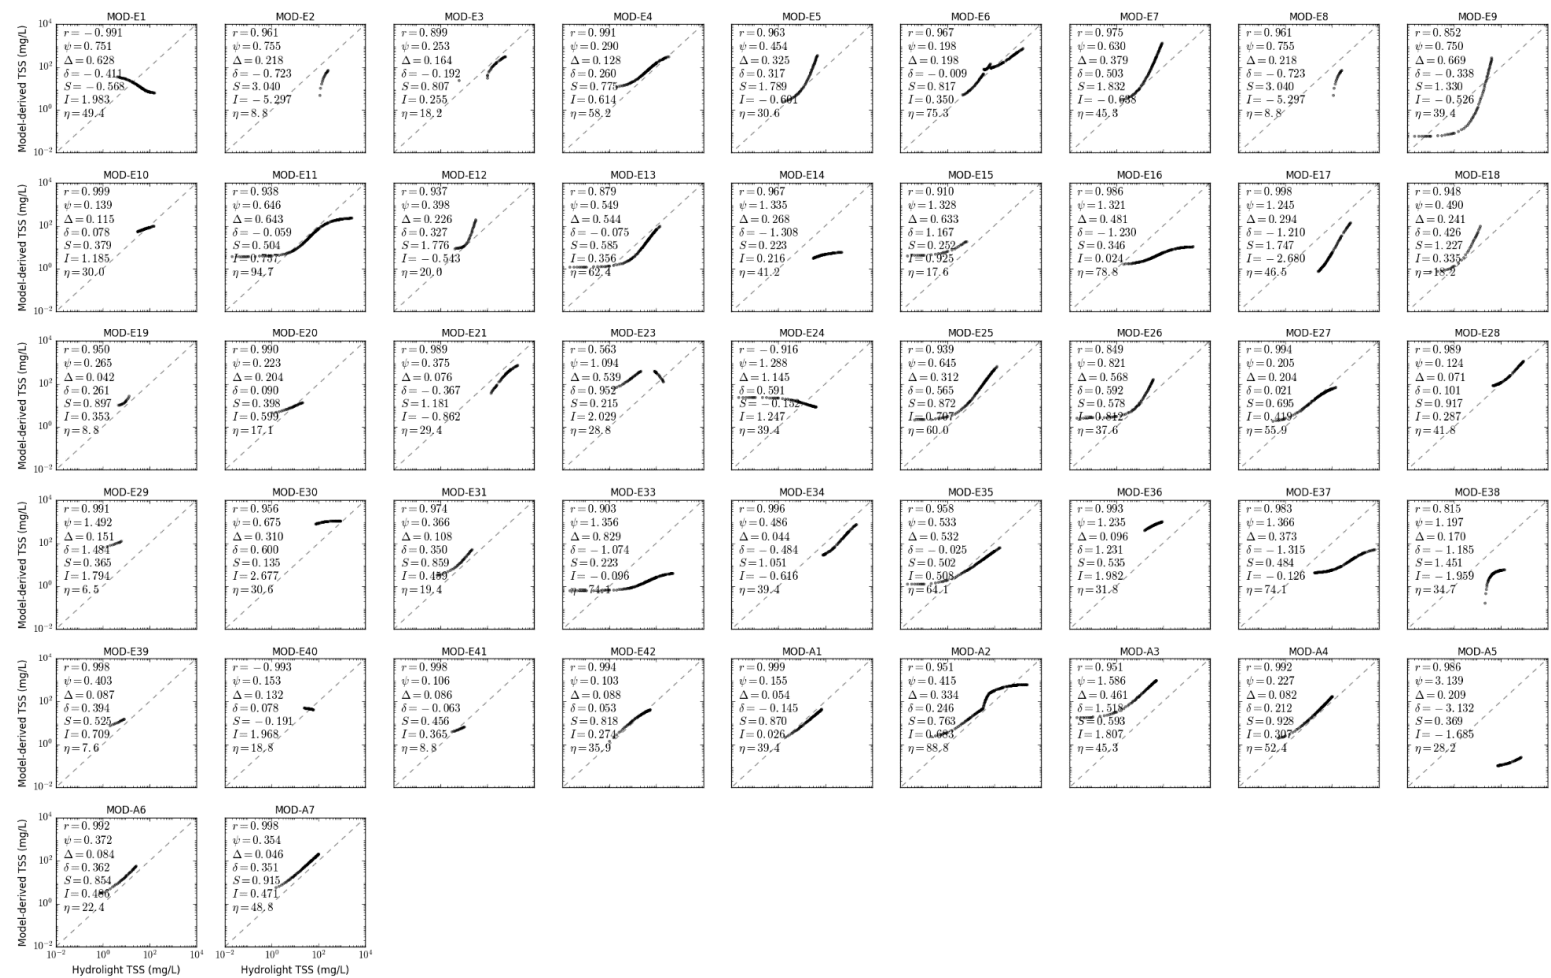

Figure S5.5. Scatter plot of MODIS TSS models in CLASS-V water for yellow clay sediment,  $b_b/b$  ratio of 0.018, solar zenith angle of 30°.

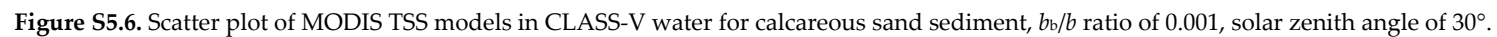

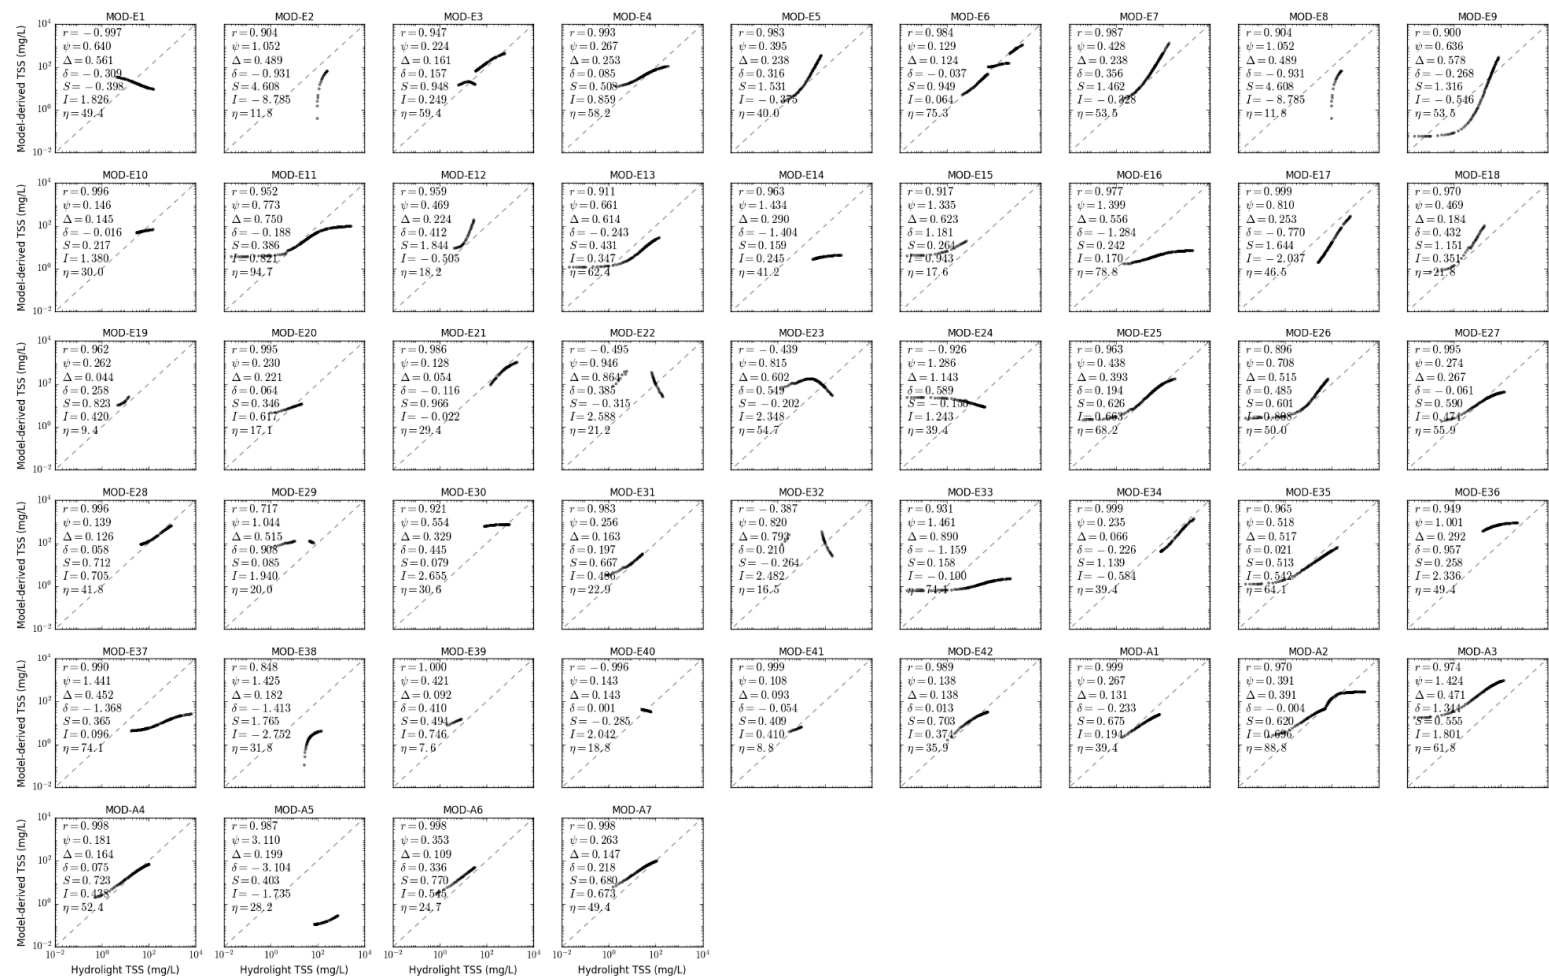

Figure S5.7. Scatter plot of MODIS TSS models in CLASS-V water for calcareous sand sediment,  $b_b/b$  ratio of 0.01, solar zenith angle of 30°.

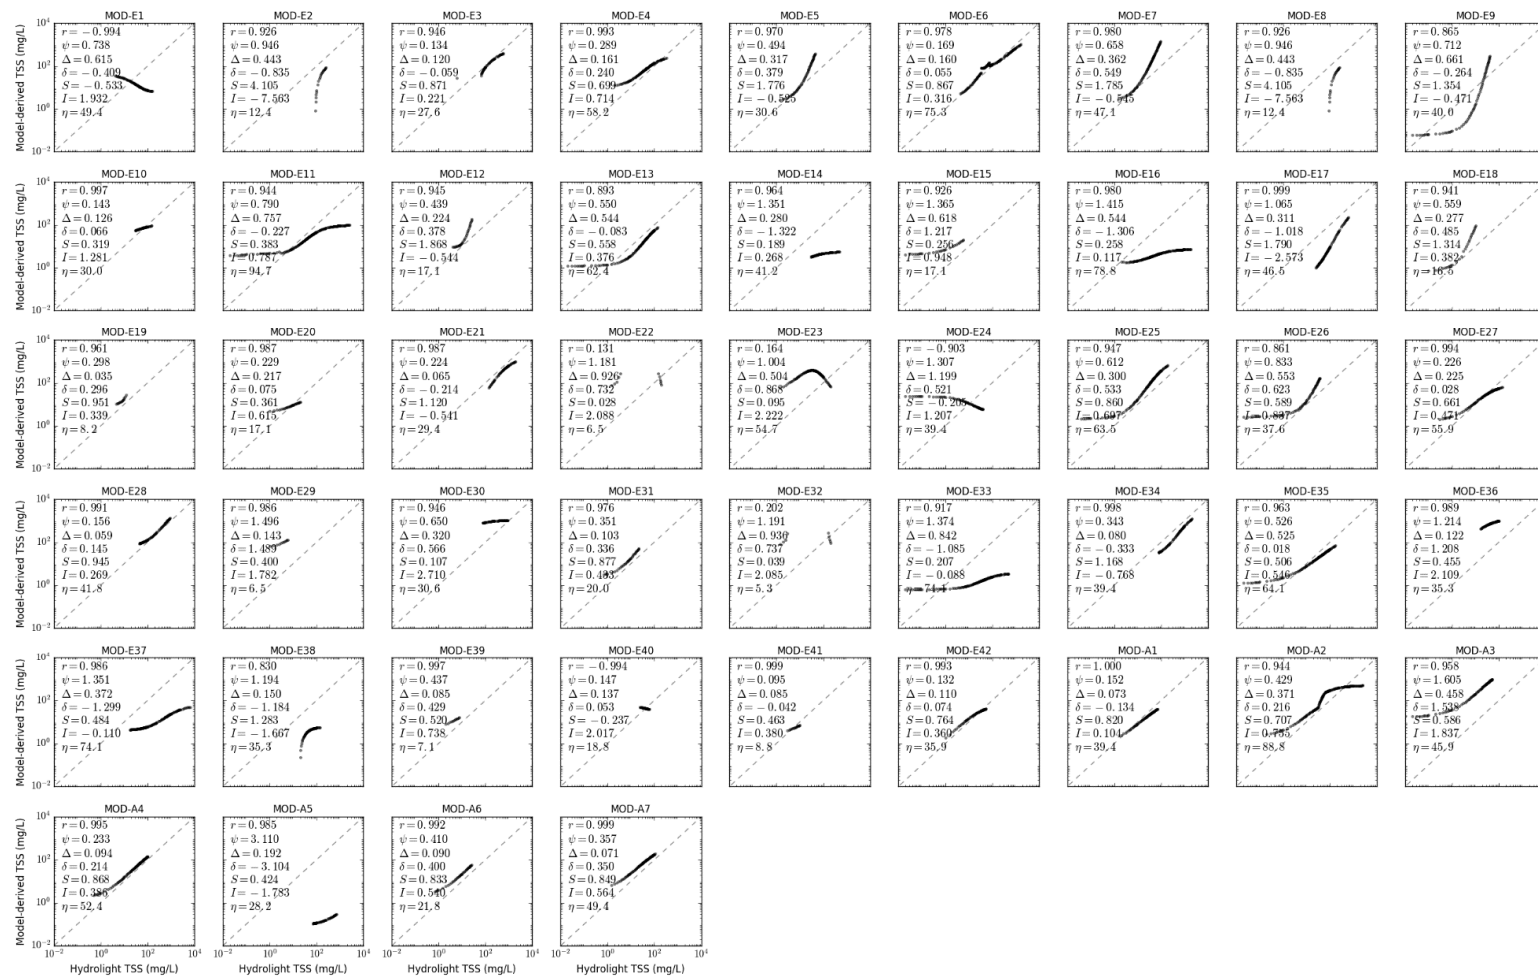

Figure S5.8. Scatter plot of MODIS TSS models in CLASS-V water for calcareous sand sediment,  $b_b/b$  ratio of 0.05, solar zenith angle of  $30^\circ$ .

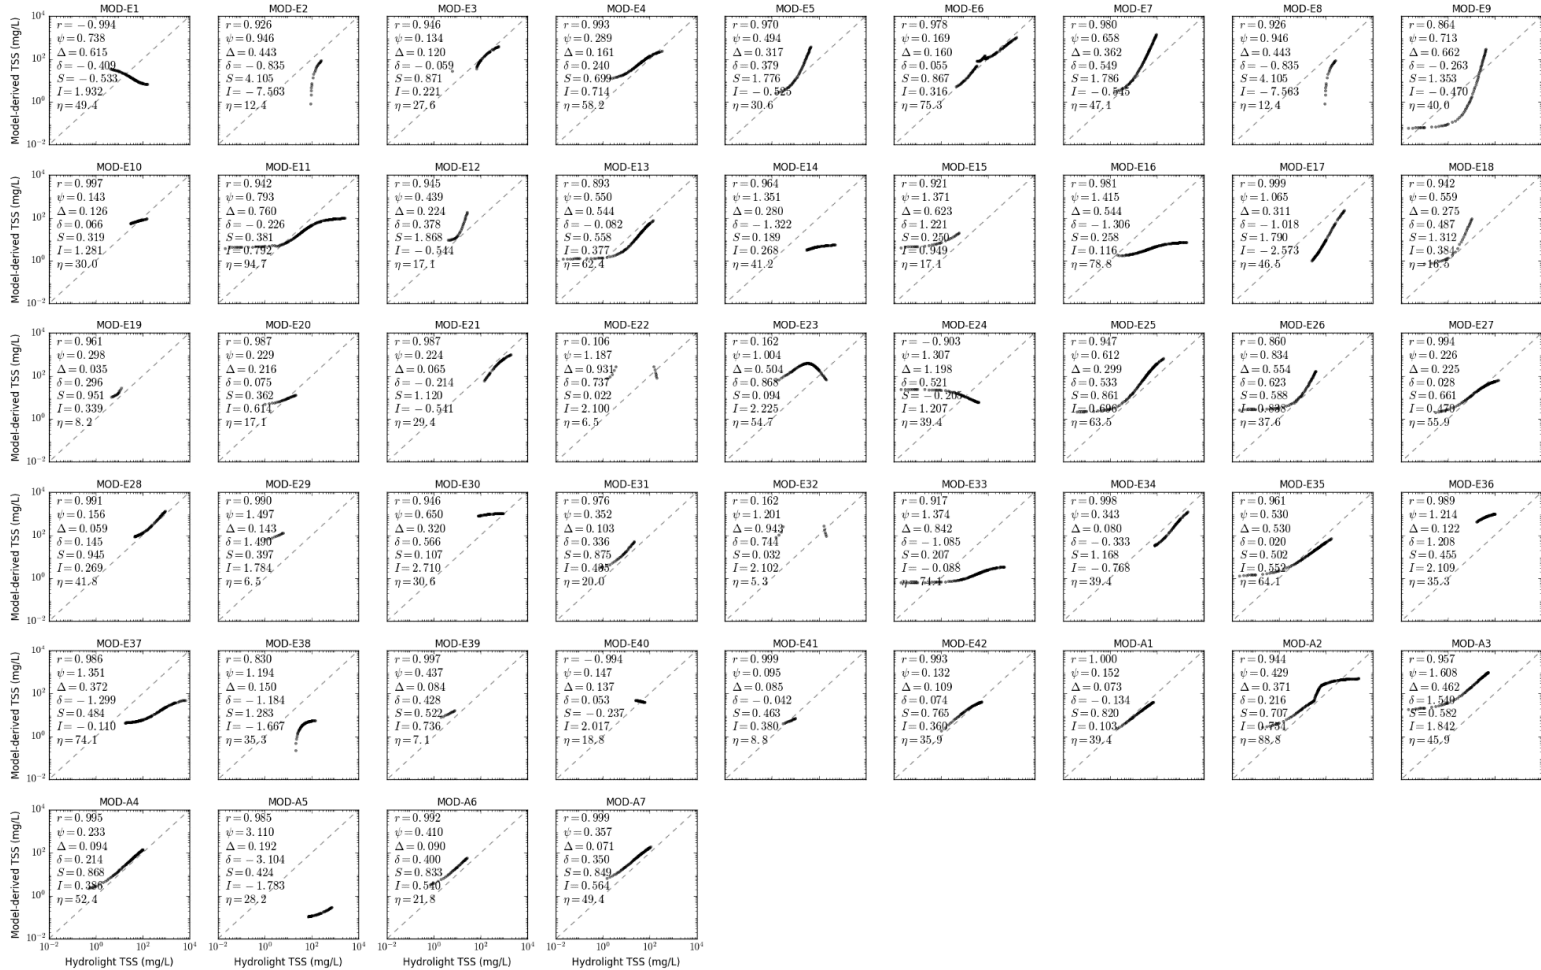

Figure S5.9. Scatter plot of MODIS TSS models in CLASS-V water for calcareous sand sediment,  $b_b/b$  ratio of 0.1, solar zenith angle of 30°.

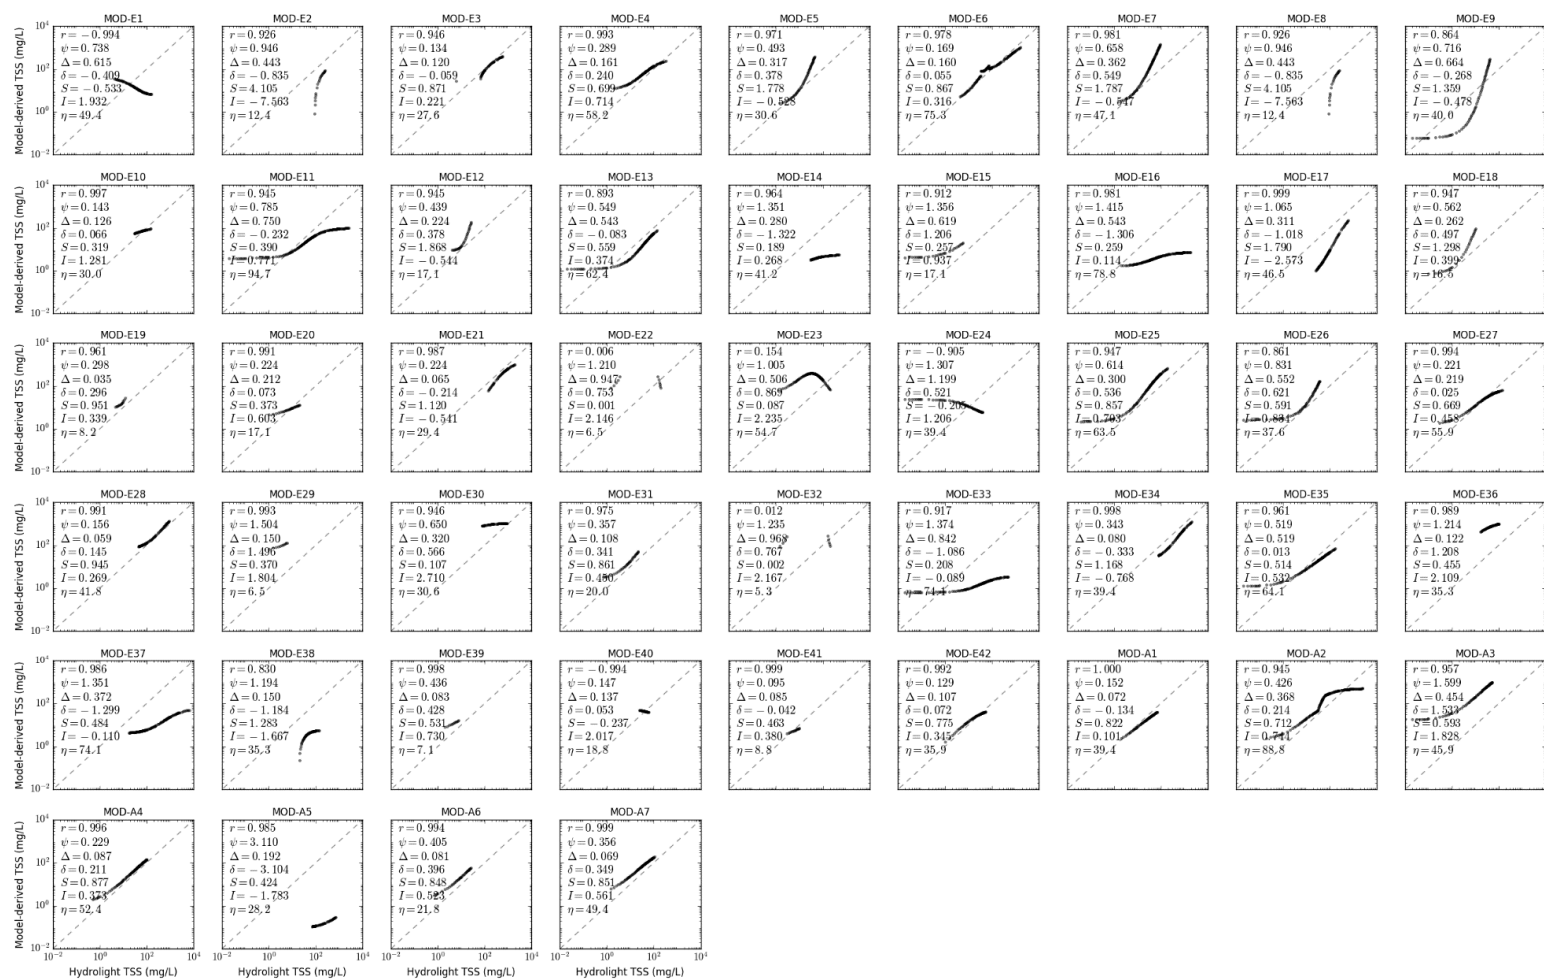

Figure S5.10. Scatter plot of MODIS TSS models in CLASS-V water for calcareous sand sediment,  $b_b/b$  ratio of 0.018, solar zenith angle of  $15^\circ$ .

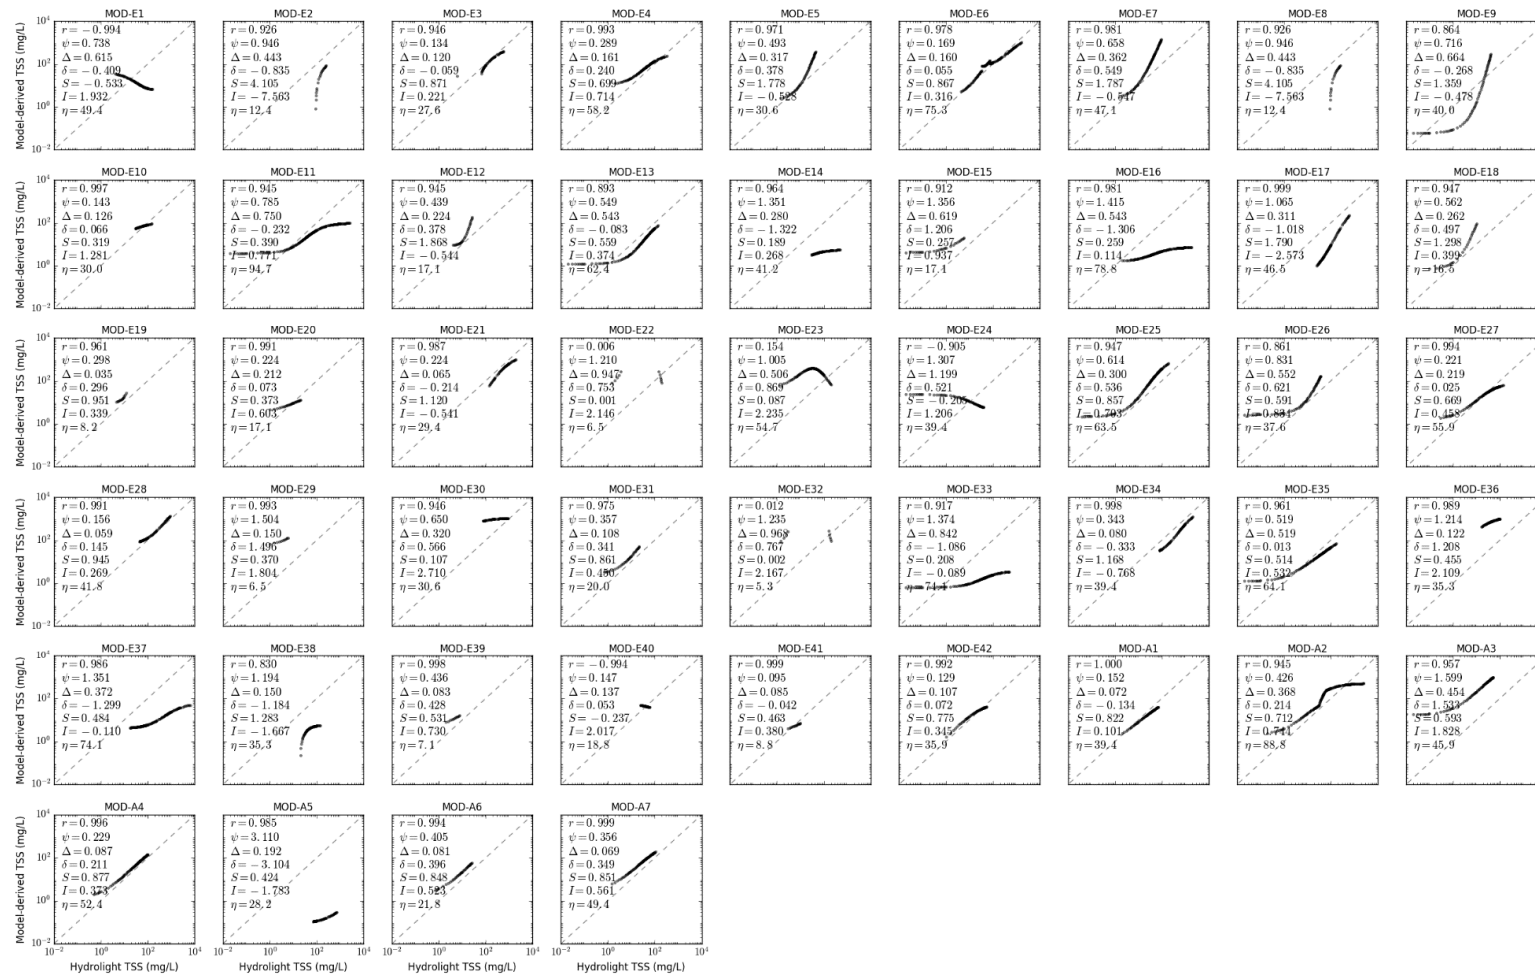

Figure S5.11. Scatter plot of MODIS TSS models in CLASS-V water for calcareous sand sediment,  $b_b/b$  ratio of 0.018, solar zenith angle of  $45^\circ$ .

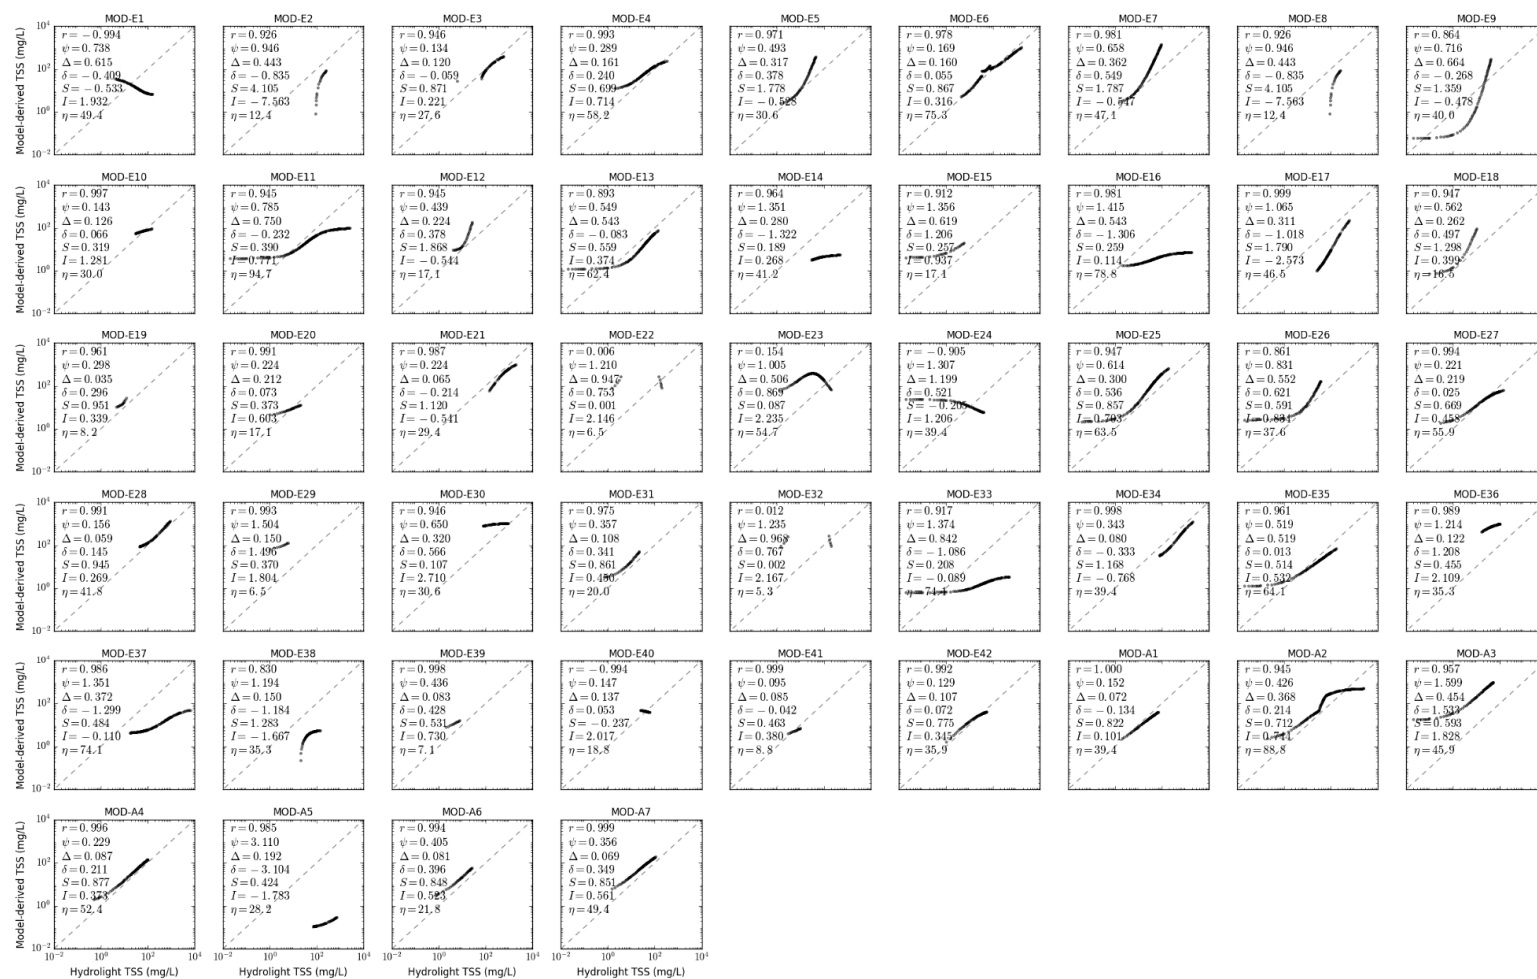

**Figure S5.12.** Scatter plot of MODIS TSS models in CLASS-5V water for calcareous sand sediment,  $b_b/b$  ratio of 0.018, solar zenith angle of  $60^\circ$ .



Supplementary Materials S6. Scatter Plot of LANDSAT TSS Models for CLASS-I Water

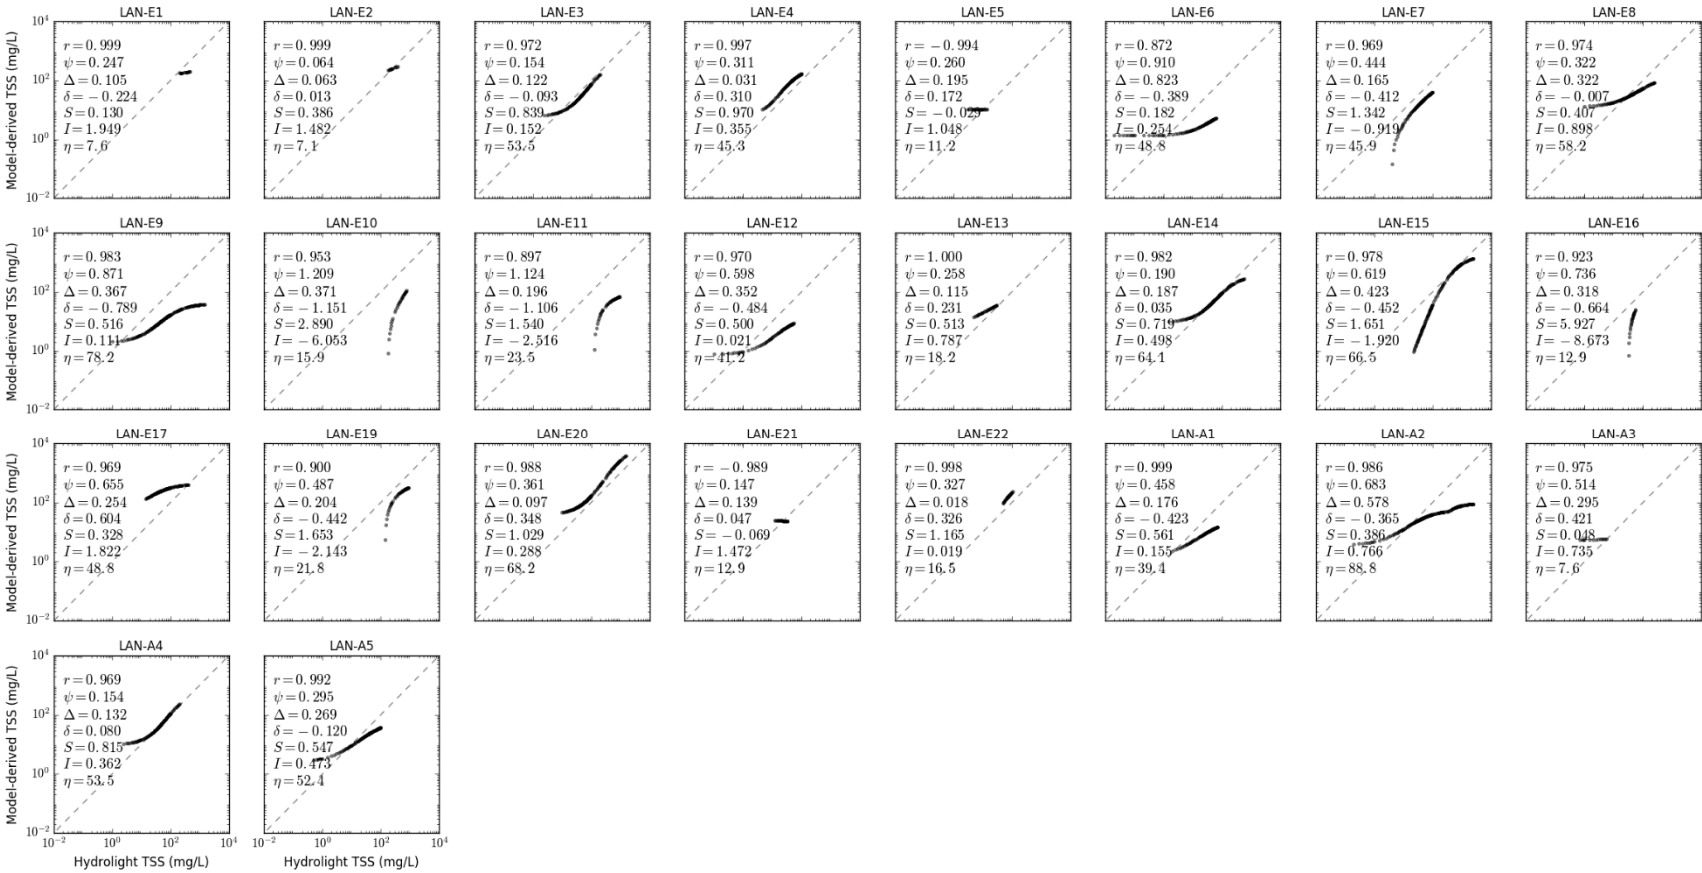

Figure S6.1. Scatter plot of LANDSAT TSS models in CLASS-I water for brown earth sediment,  $b_b/b$  ratio of 0.018, solar zenith angle of 30°.

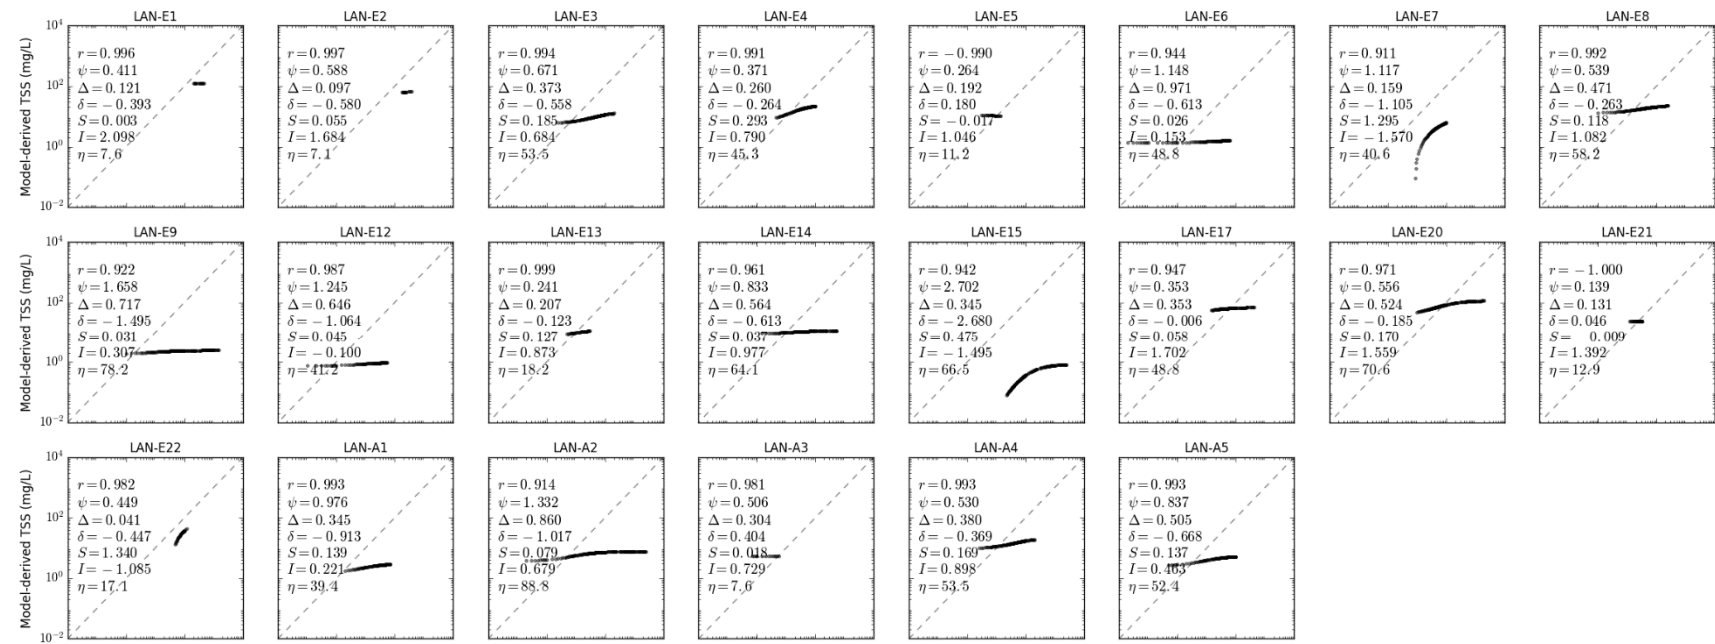

Figure S6.2. Scatter plot of LANDSAT TSS models in CLASS-I water for bukata sediment,  $b_0/b$  ratio of 0.018, solar zenith angle of 30°.

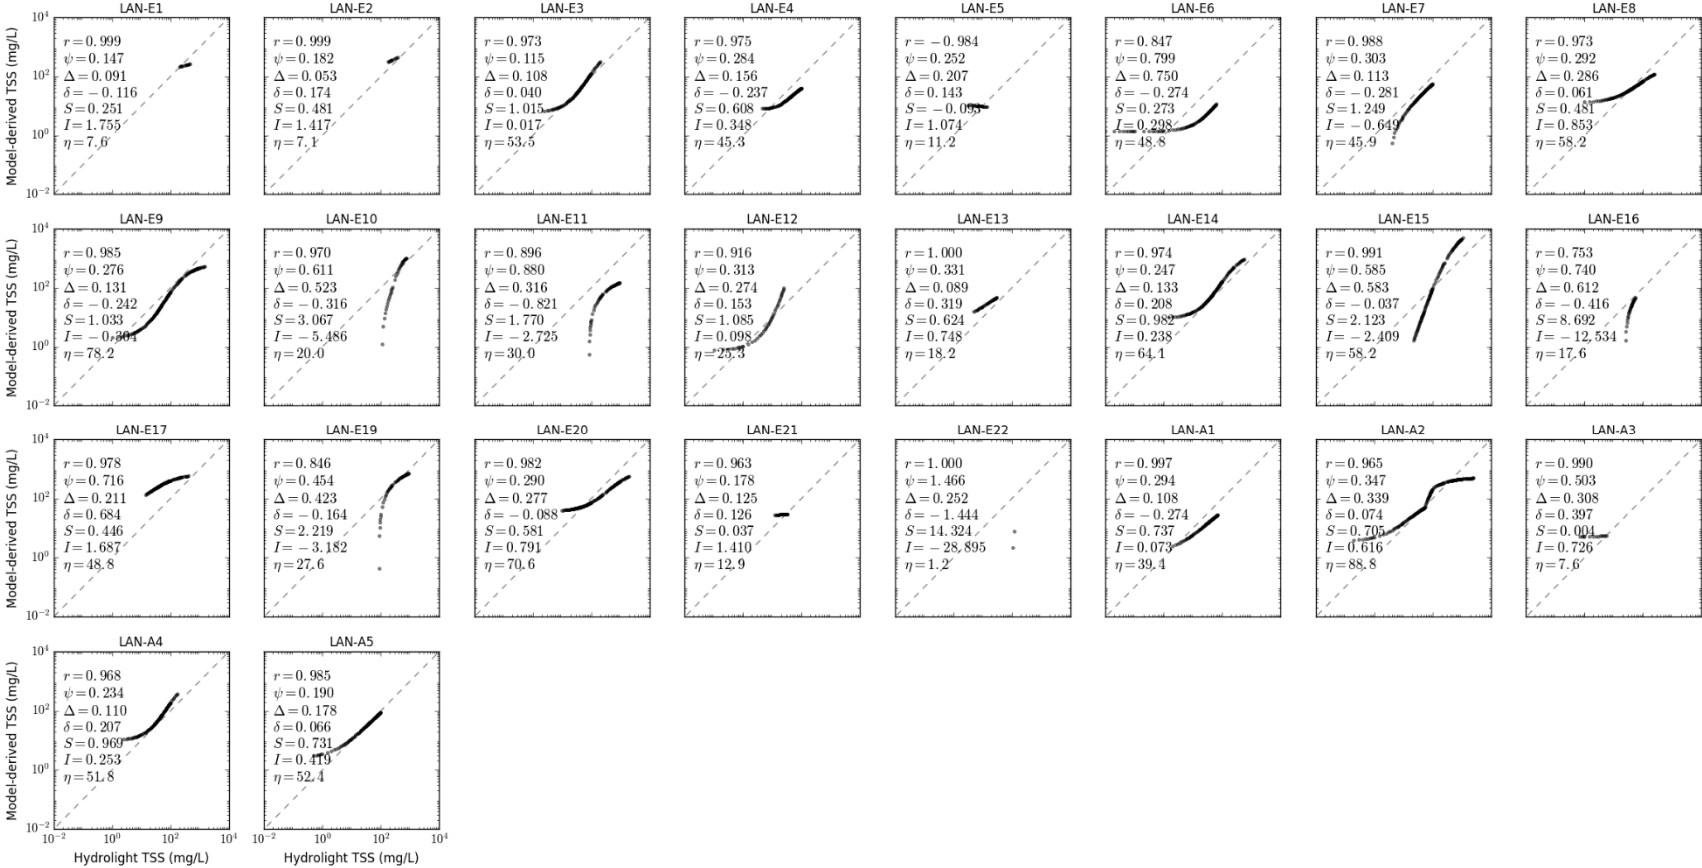

Figure S6.3. Scatter plot of LANDSAT TSS models in CLASS-I water for calcareous sand sediment,  $b_b/b$  ratio of 0.018, solar zenith angle of 30°.

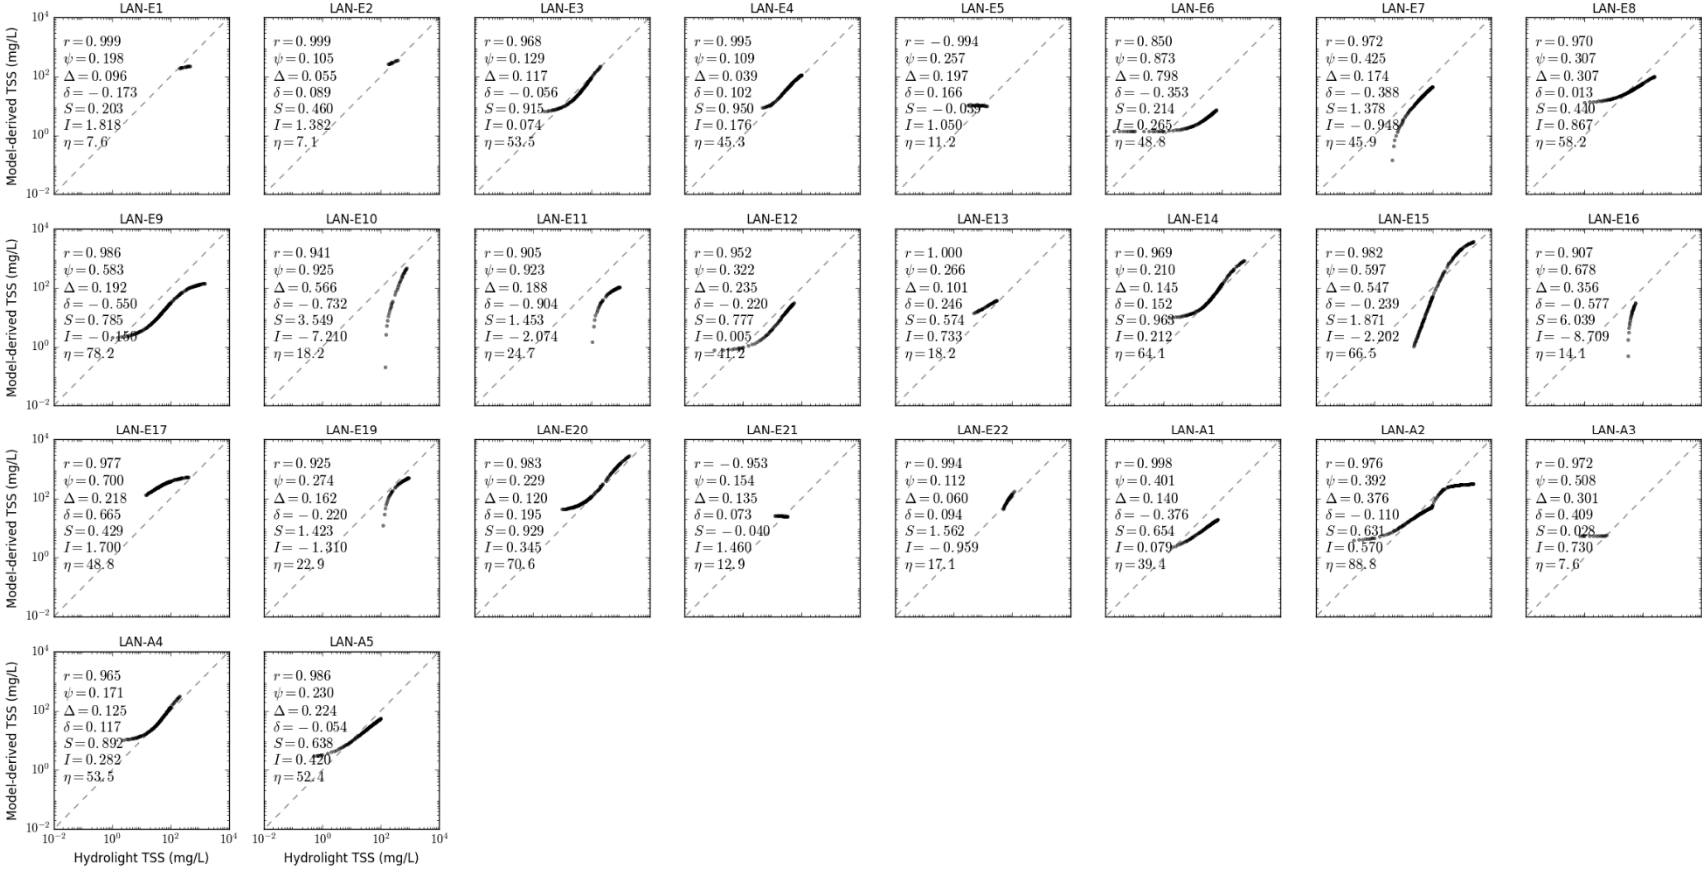

Figure S6.4. Scatter plot of LANDSAT TSS models in CLASS-I water for red clay sediment,  $b_b/b$  ratio of 0.018, solar zenith angle of 30°.

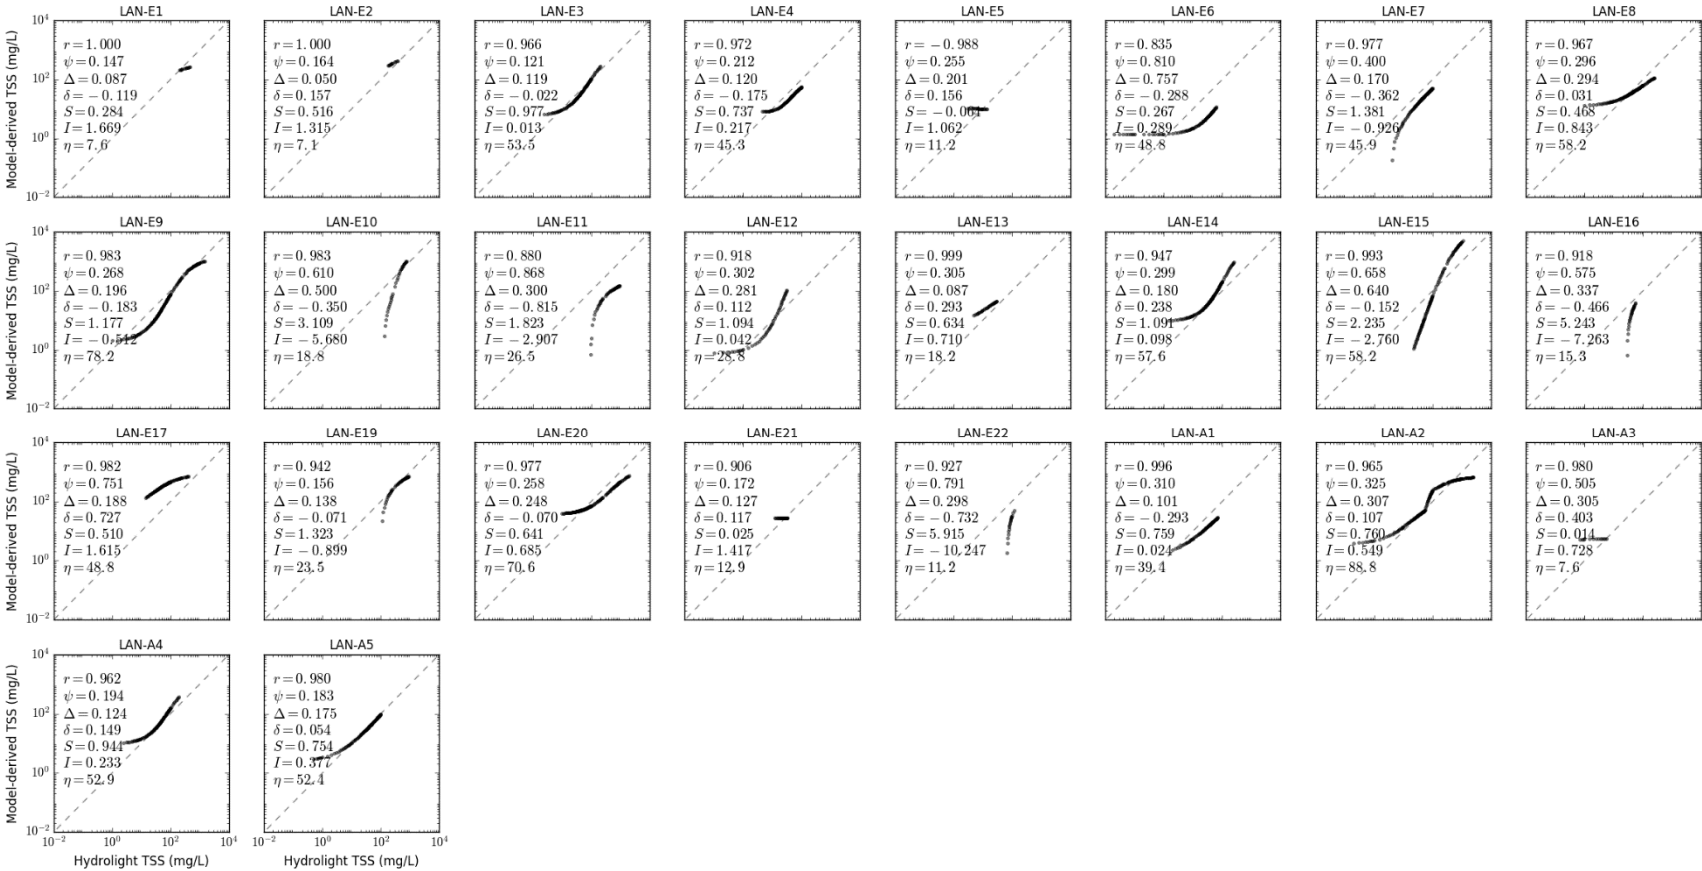

Figure S6.5. Scatter plot of LANDSAT TSS models in CLASS-I water for yellow clay sediment,  $b_b/b$  ratio of 0.018, solar zenith angle of  $30^\circ$ .

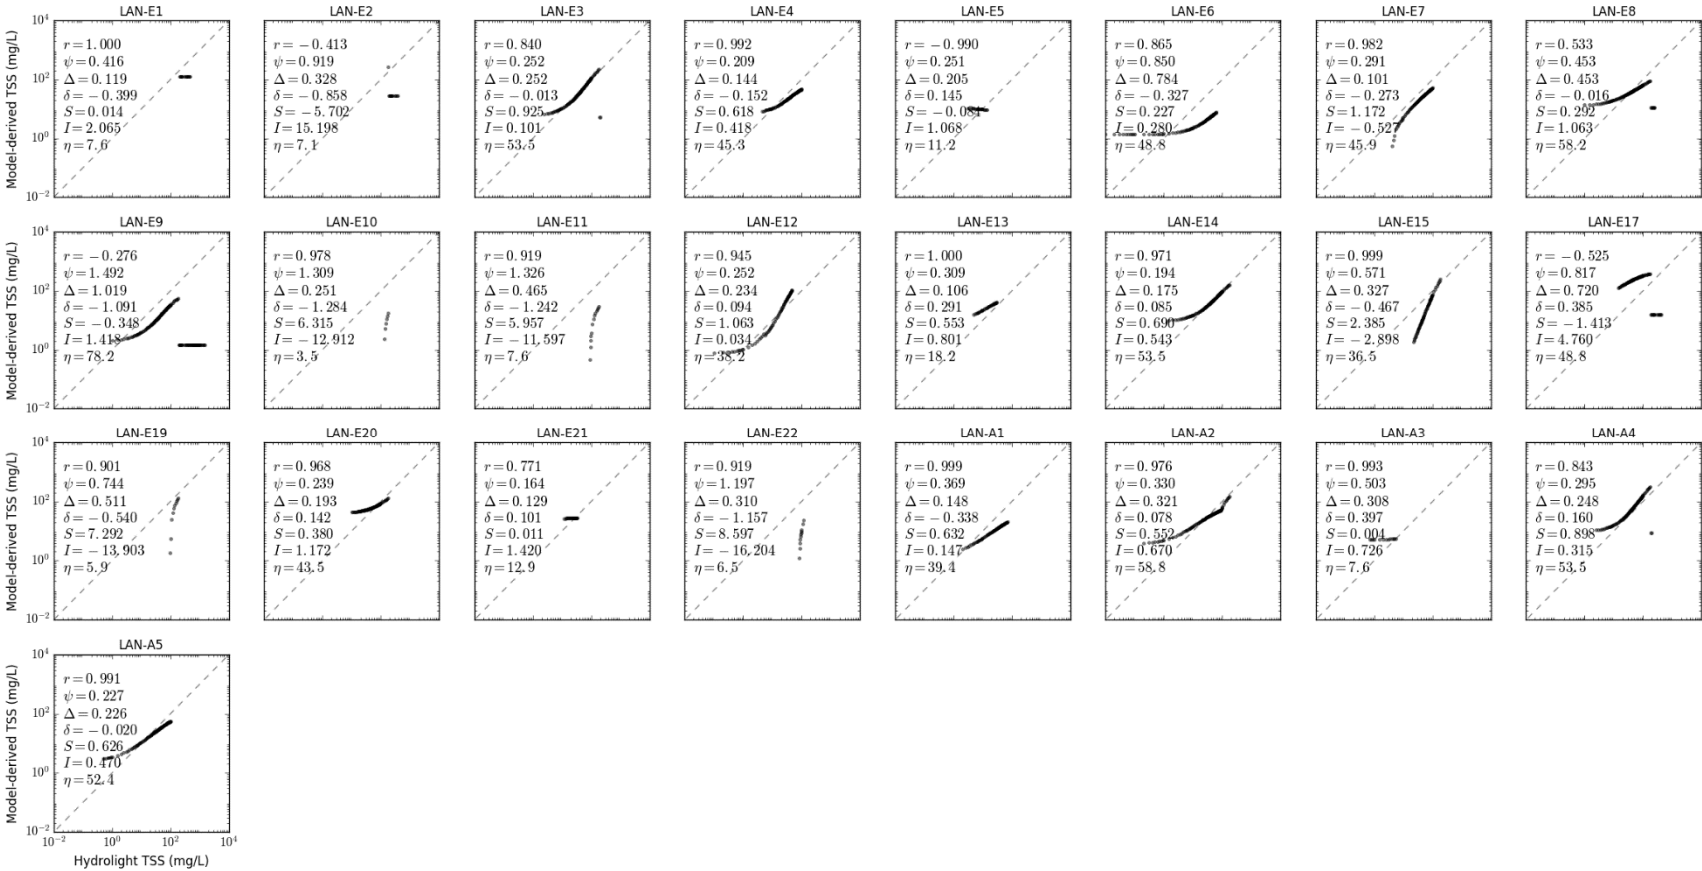

Figure S6.6. Scatter plot of LANDSAT TSS models in CLASS-I water for calcareous sand sediment,  $b_b/b$  ratio of 0.001, solar zenith angle of 30°.

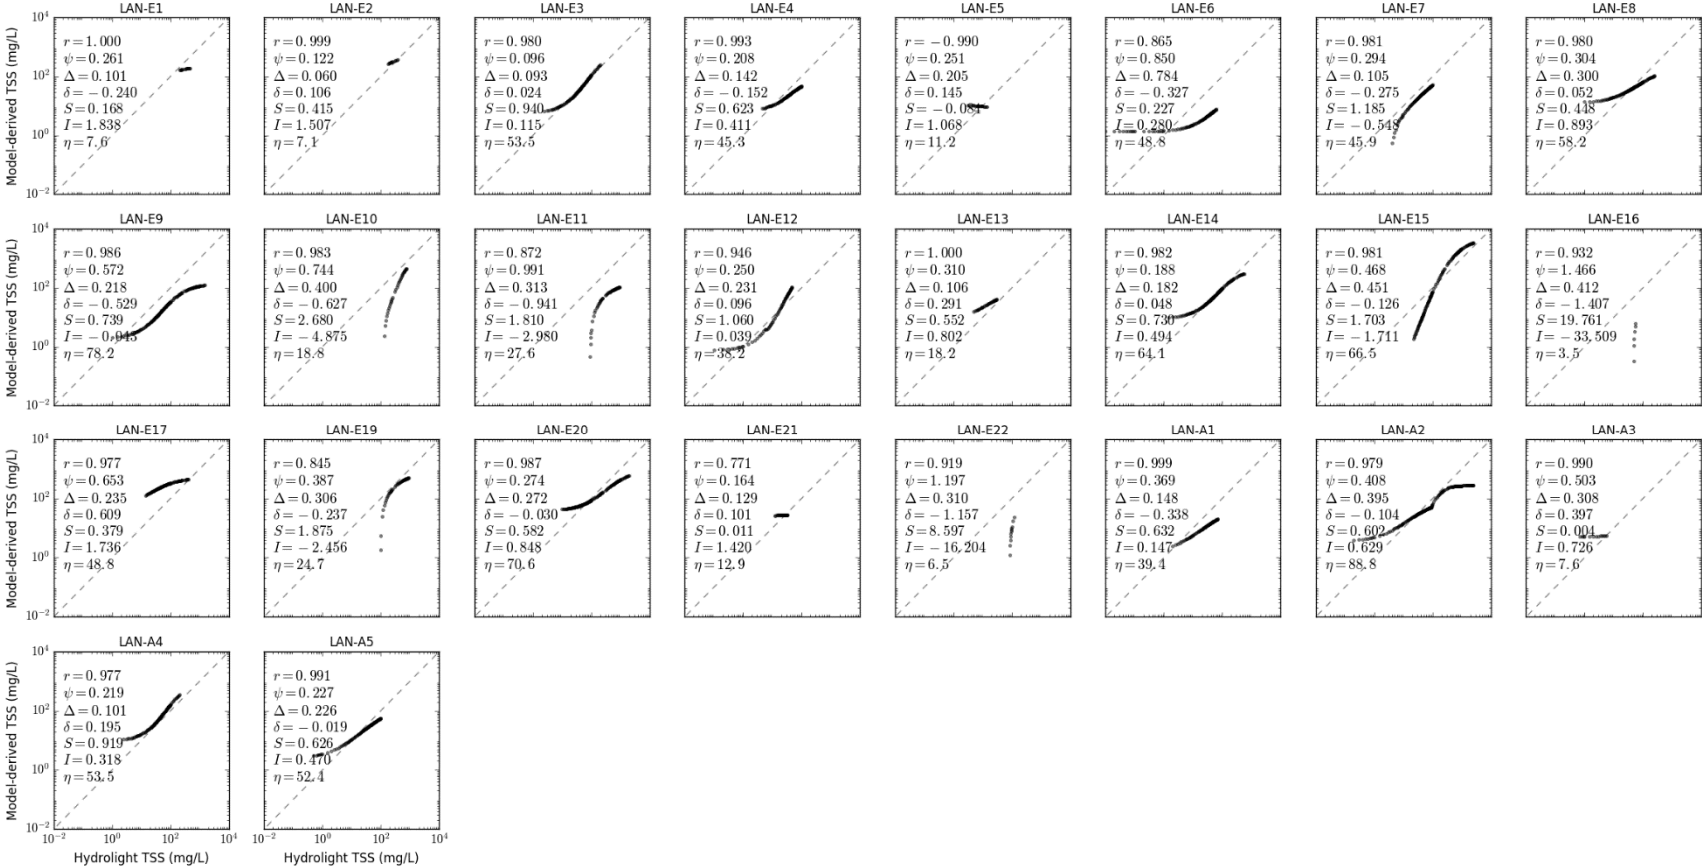

Figure S6.7. Scatter plot of LANDSAT TSS models in CLASS-I water for calcareous sand sediment,  $b_b/b$  ratio of 0.01, solar zenith angle of 30°.

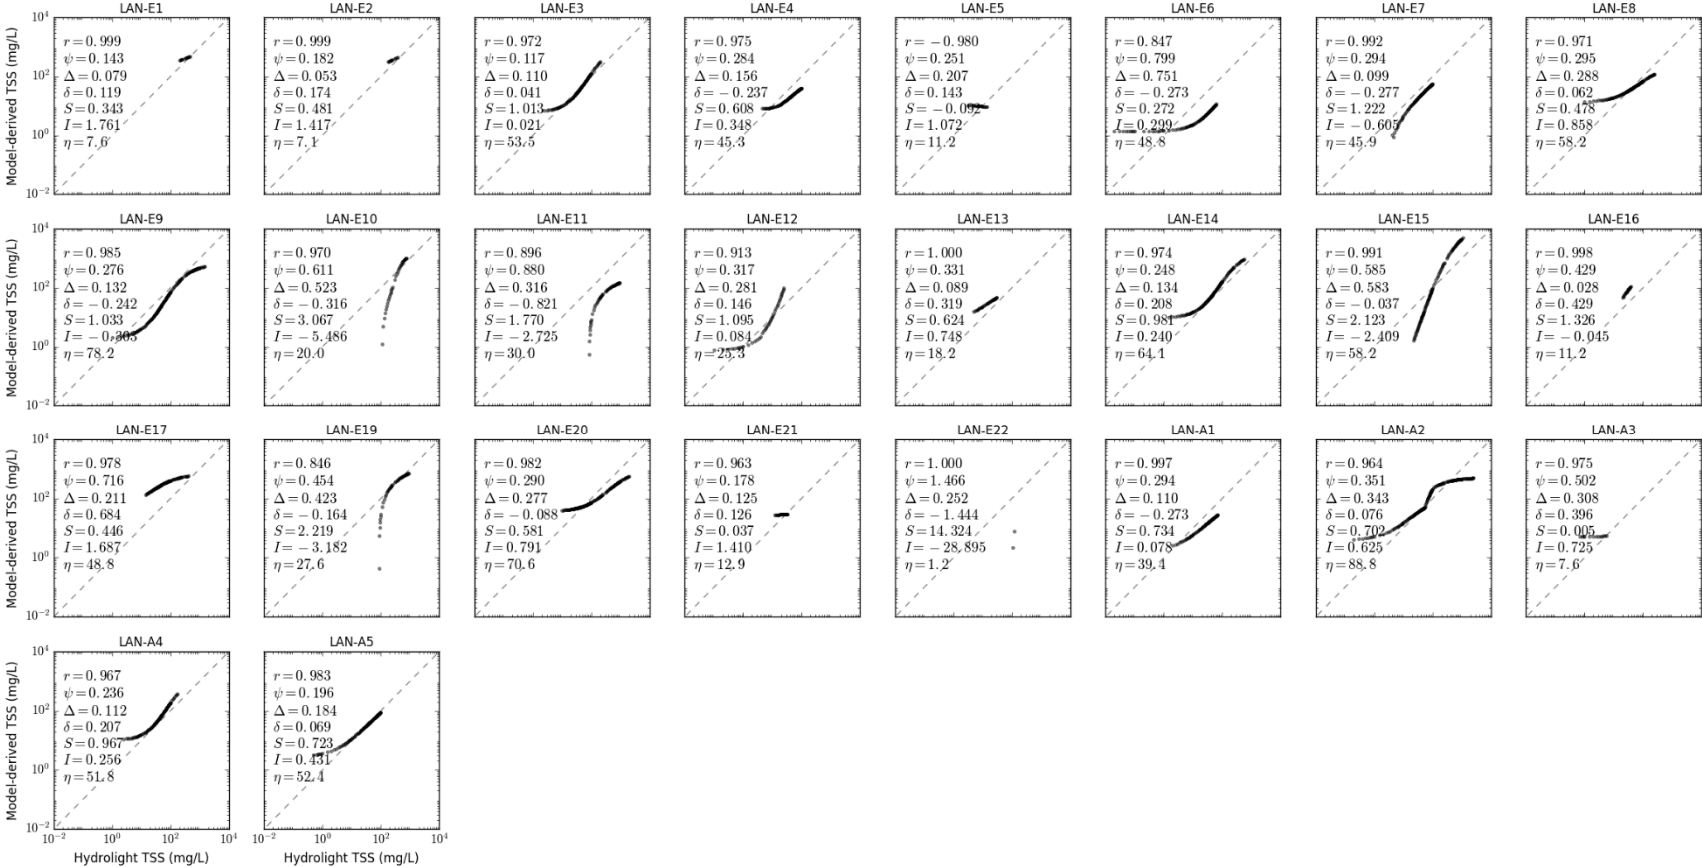

Figure S6.8. Scatter plot of LANDSAT TSS models in CLASS-I water for calcareous sand sediment,  $b_b/b$  ratio of 0.05, solar zenith angle of 30°.



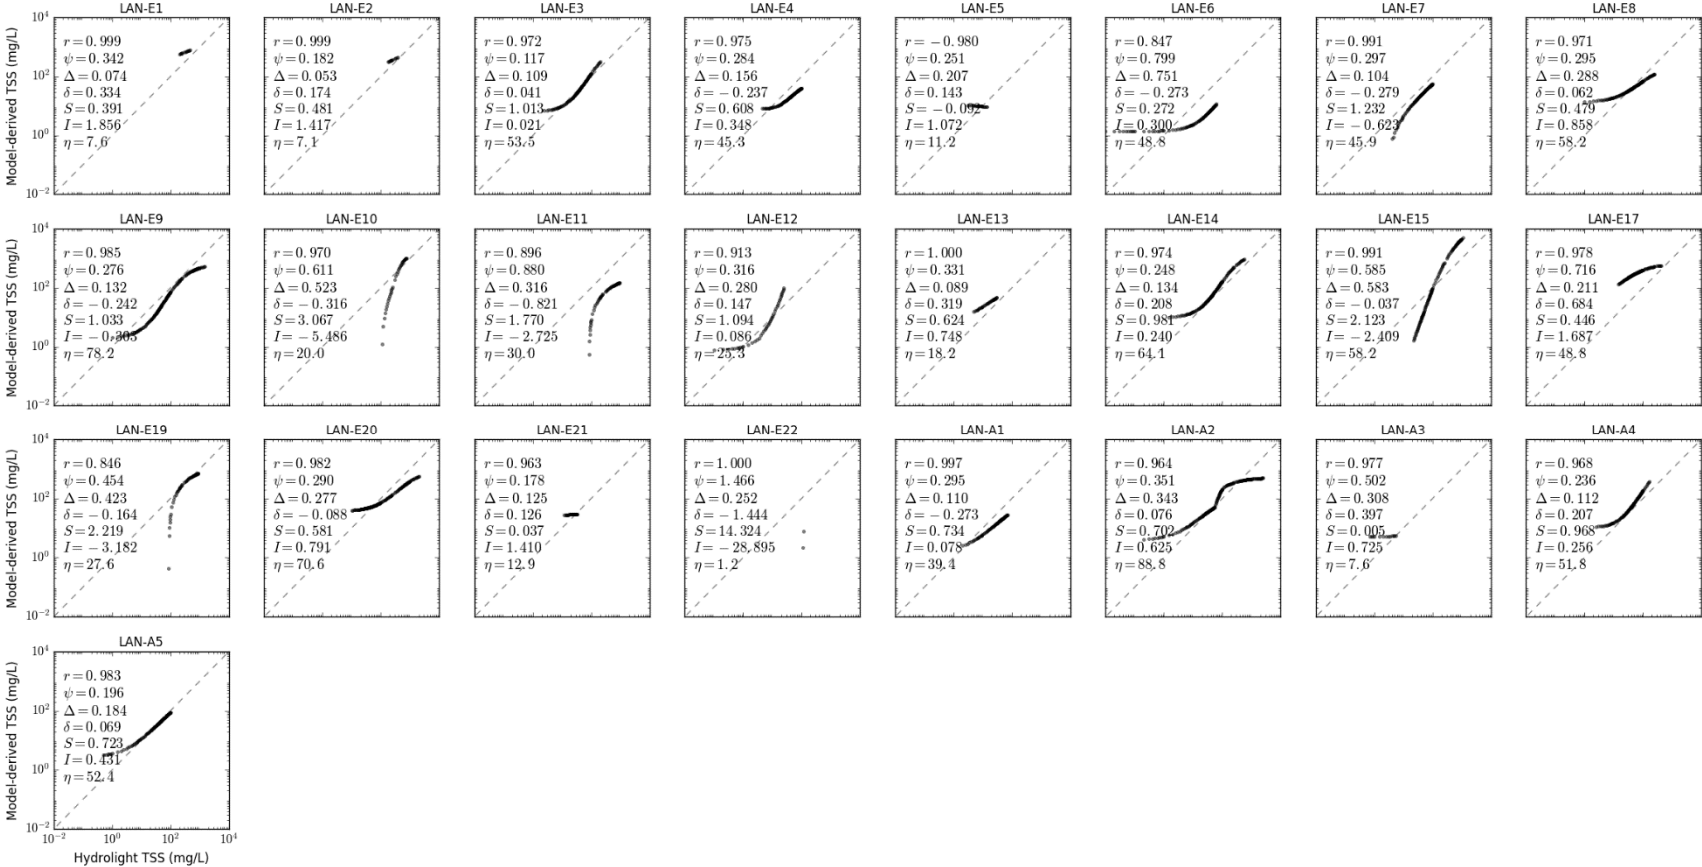

**Figure S6.9.** Scatter plot of LANDSAT TSS models in CLASS-I water for calcareous sand sediment,  $b_b/b$  ratio of 0.1, solar zenith angle of 30°.

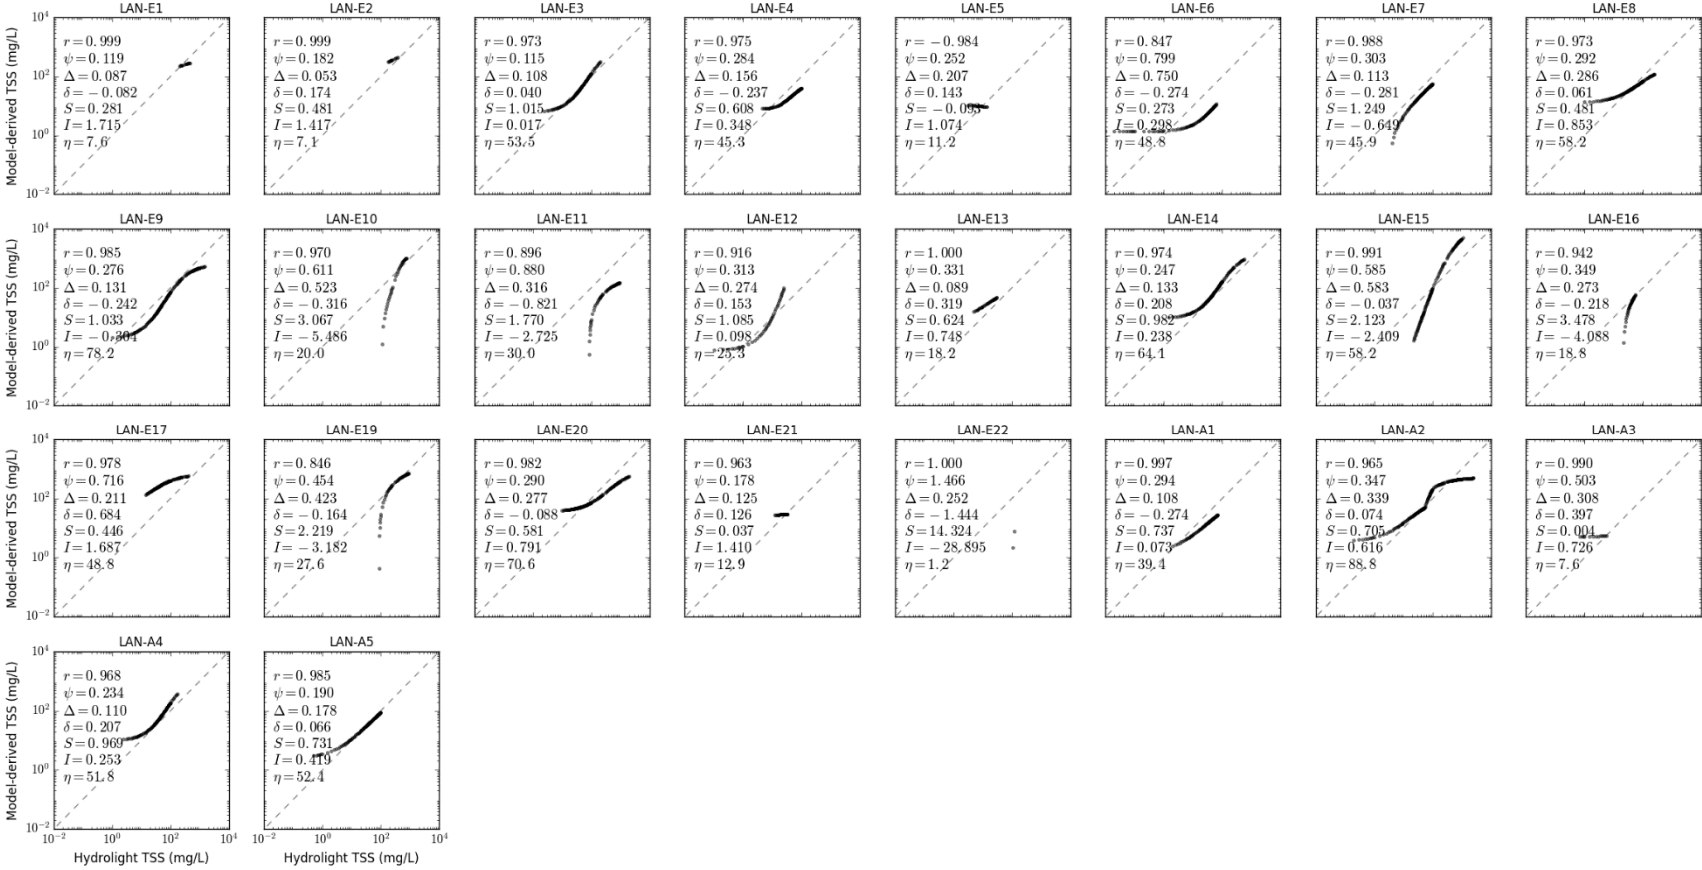

Figure S6.10. Scatter plot of LANDSAT TSS models in CLASS-I water for calcareous sand sediment,  $b_b/b$  ratio of 0.018, solar zenith angle of 15°.

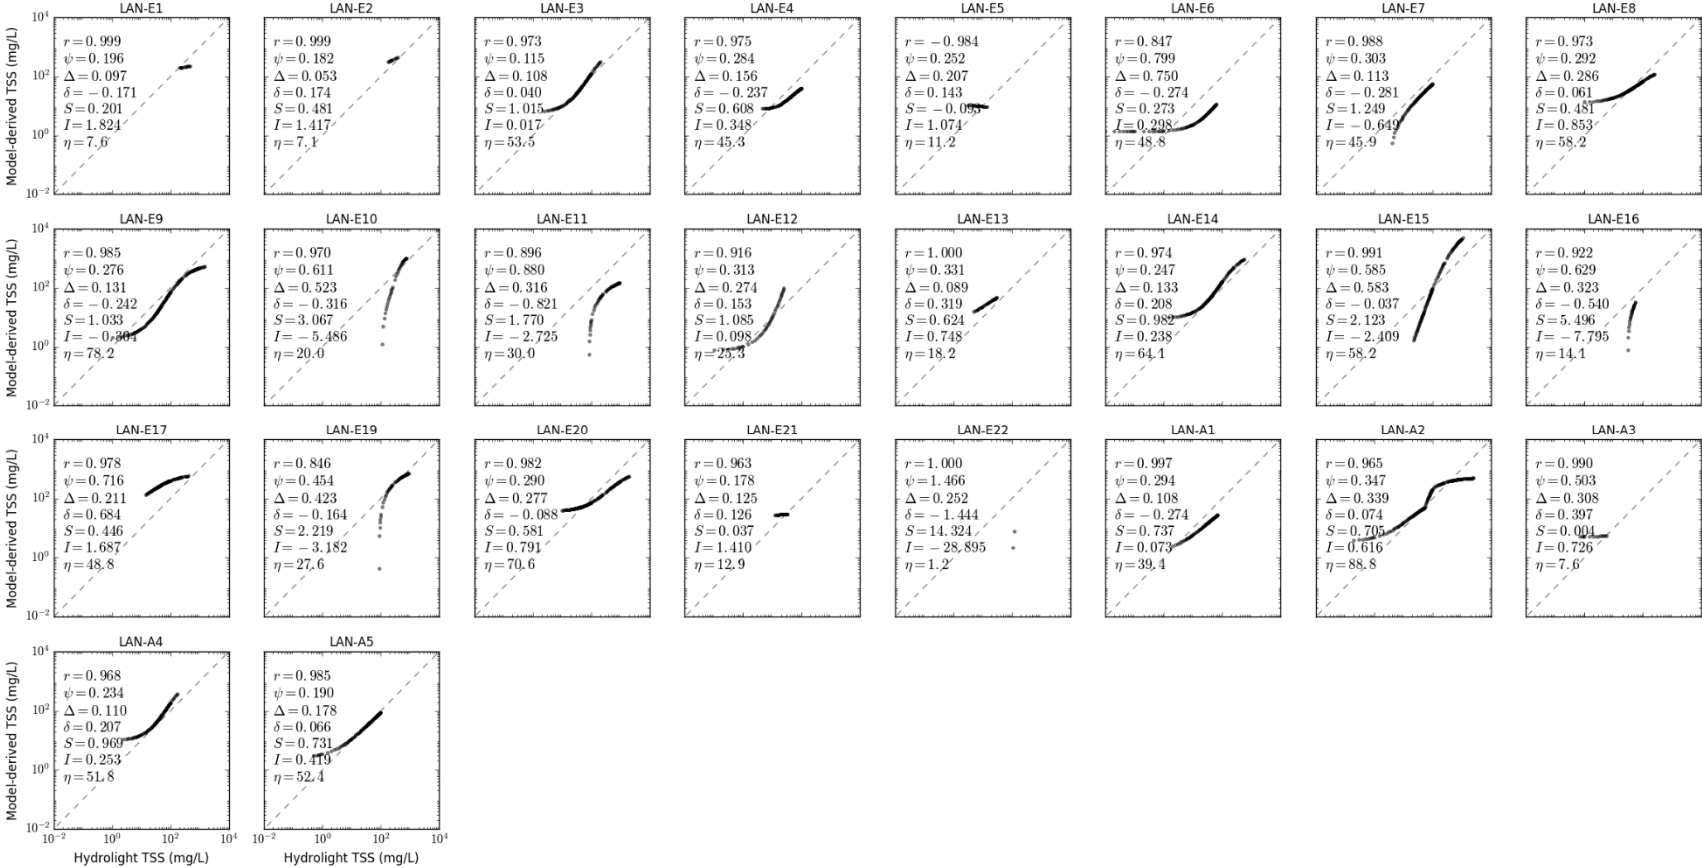

Figure S6.11. Scatter plot of LANDSAT TSS models in CLASS-I water for calcareous sand sediment,  $b_b/b$  ratio of 0.018, solar zenith angle of 45°.

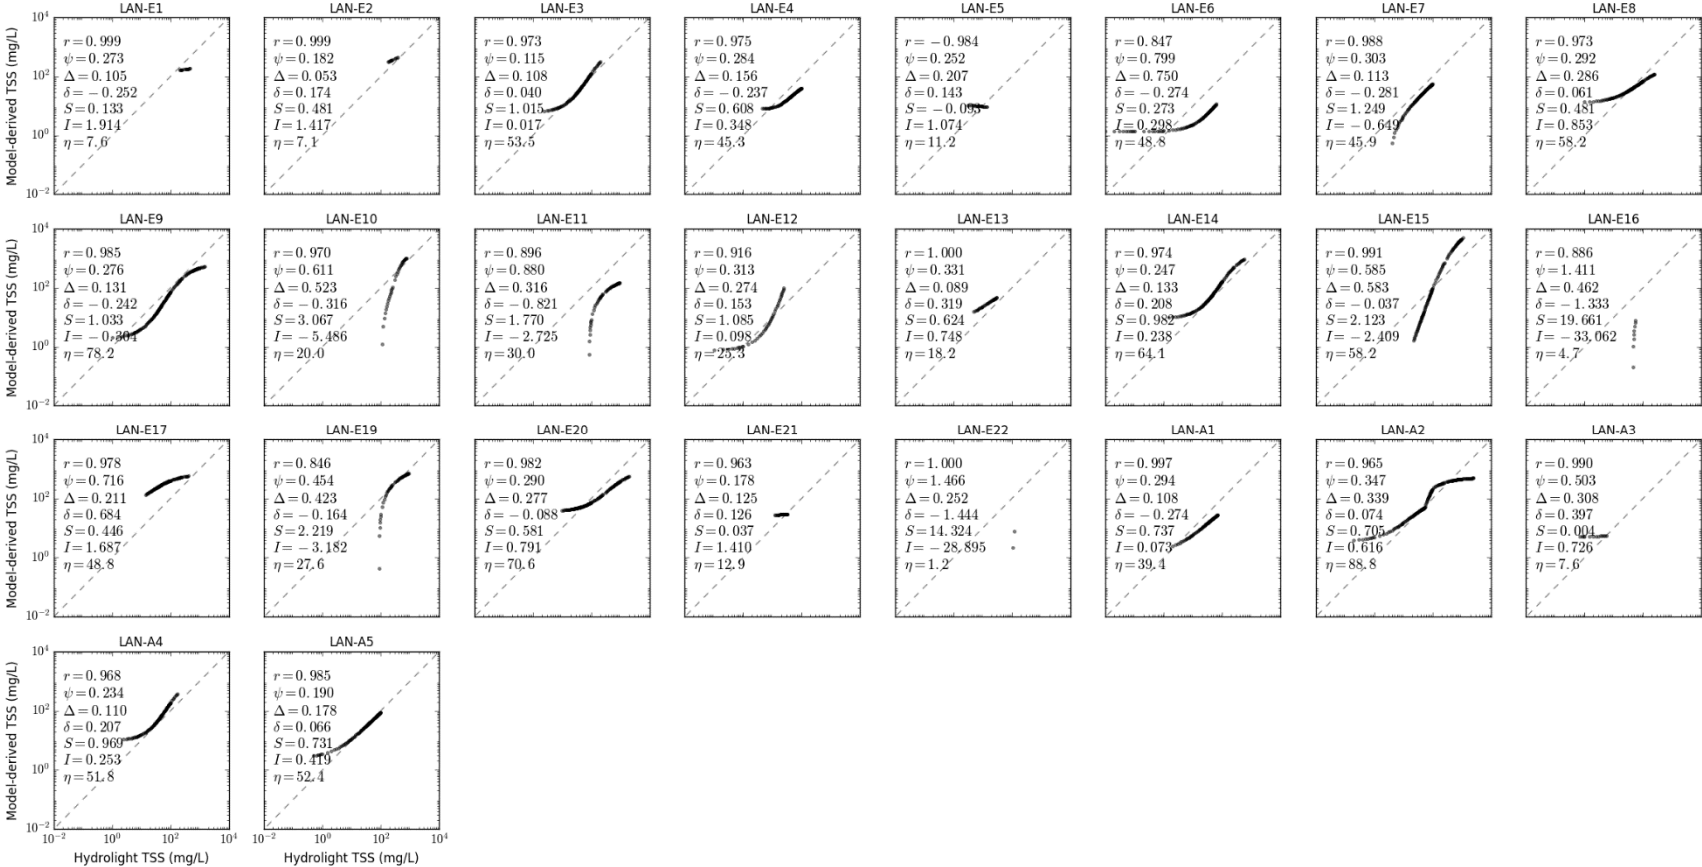

Figure S6.12. Scatter plot of LANDSAT TSS models in CLASS-I water for calcareous sand sediment,  $b_b/b$  ratio of 0.018, solar zenith angle of 60°.

Supplementary Materials S7. Scatter Plot of LANDSAT TSS Models for CLASS-II Water

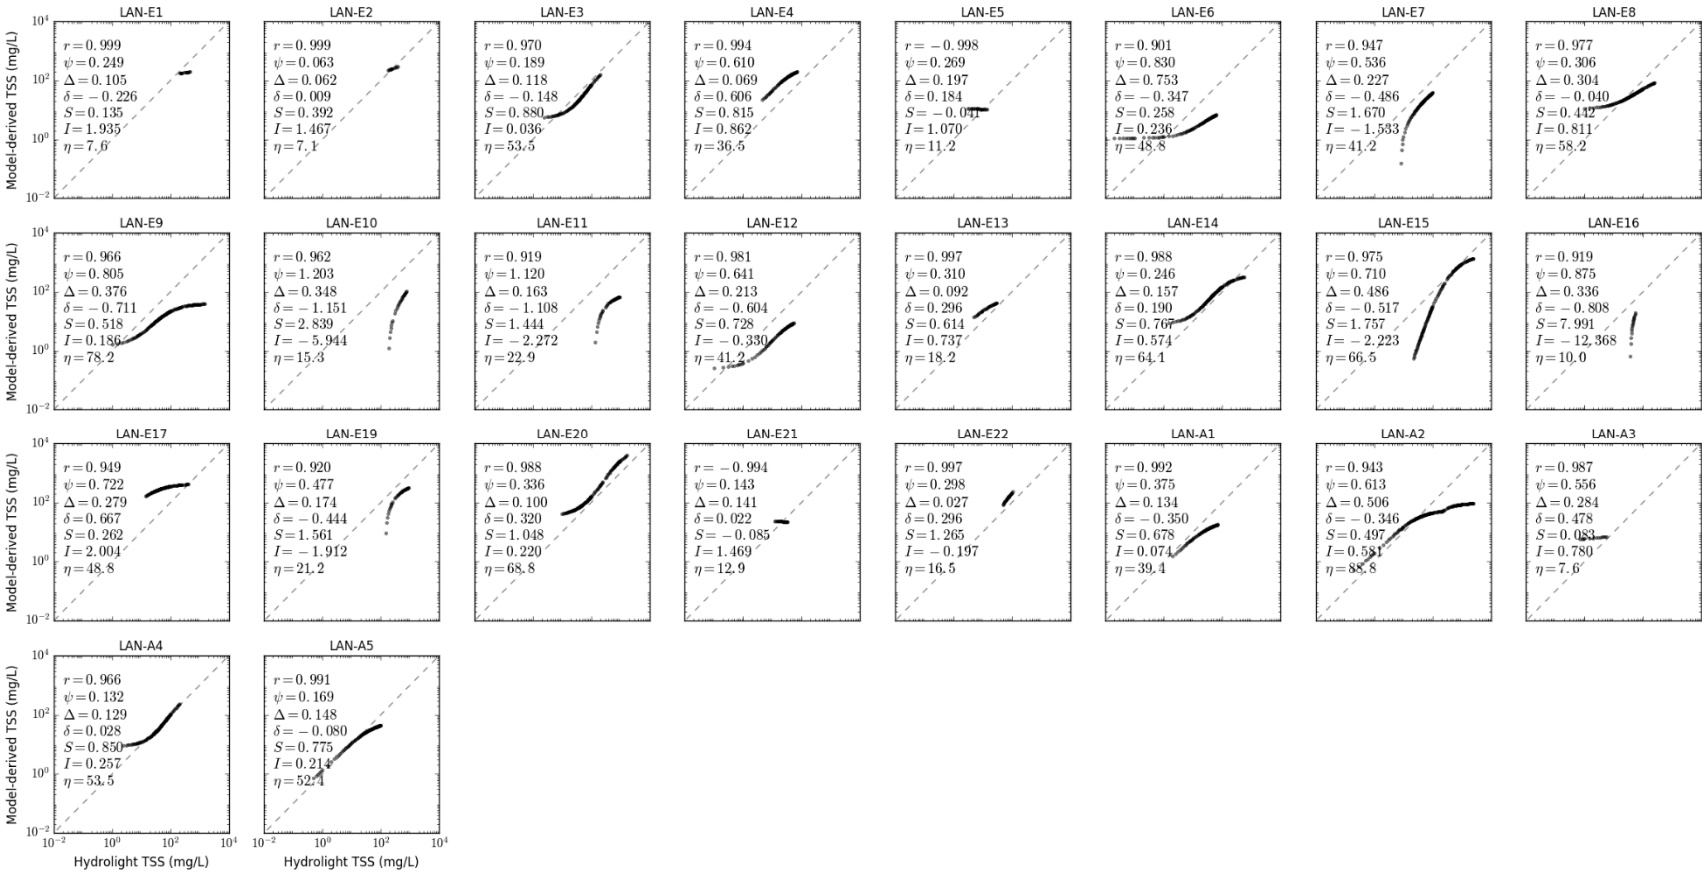

Figure S7.1. Scatter plot of LANDSAT TSS models in CLASS-II water for brown earth sediment,  $b_b/b$  ratio of 0.018, solar zenith angle of  $30^\circ$ .

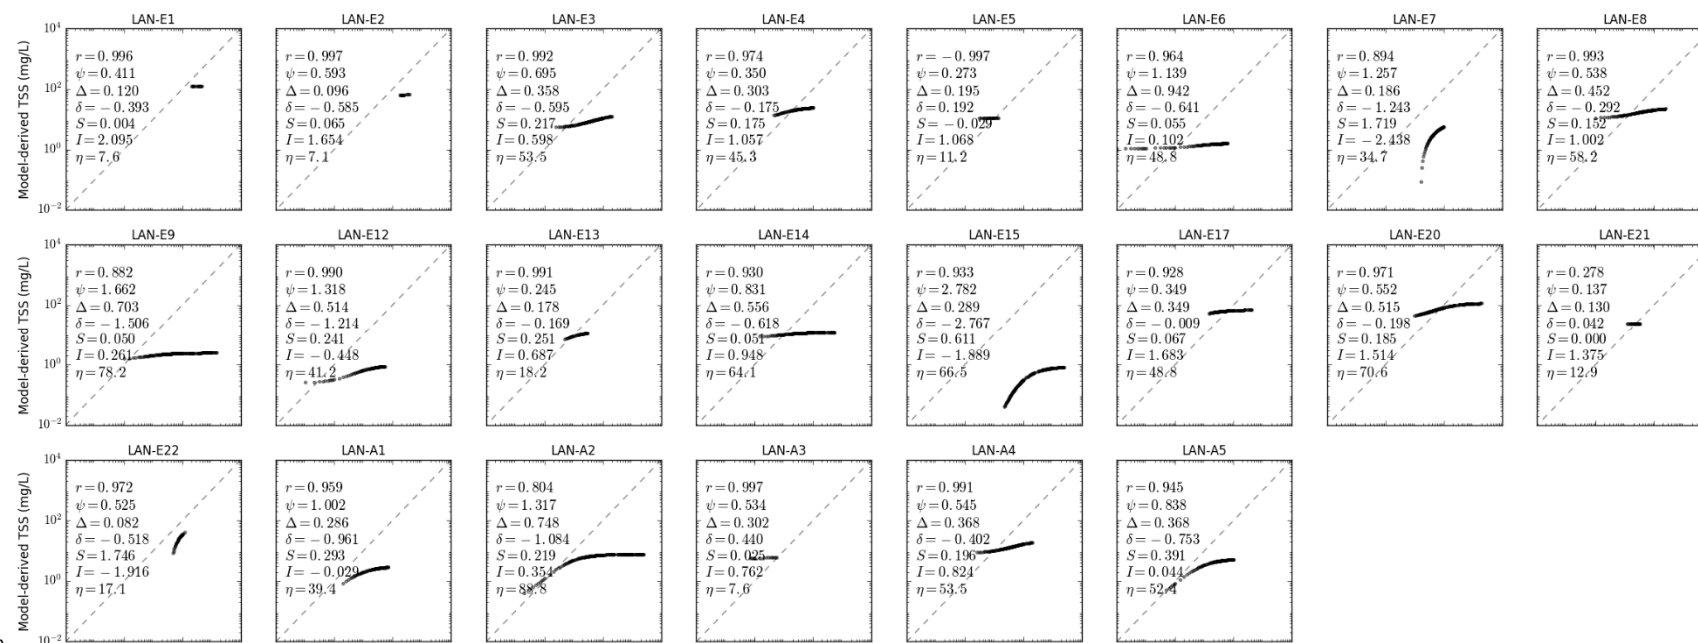

**Figure S7.2.** Scatter plot of LANDSAT TSS models in CLASS-II water for bukata sediment,  $b_b/b$  ratio of 0.018, solar zenith angle of  $30^\circ$ .

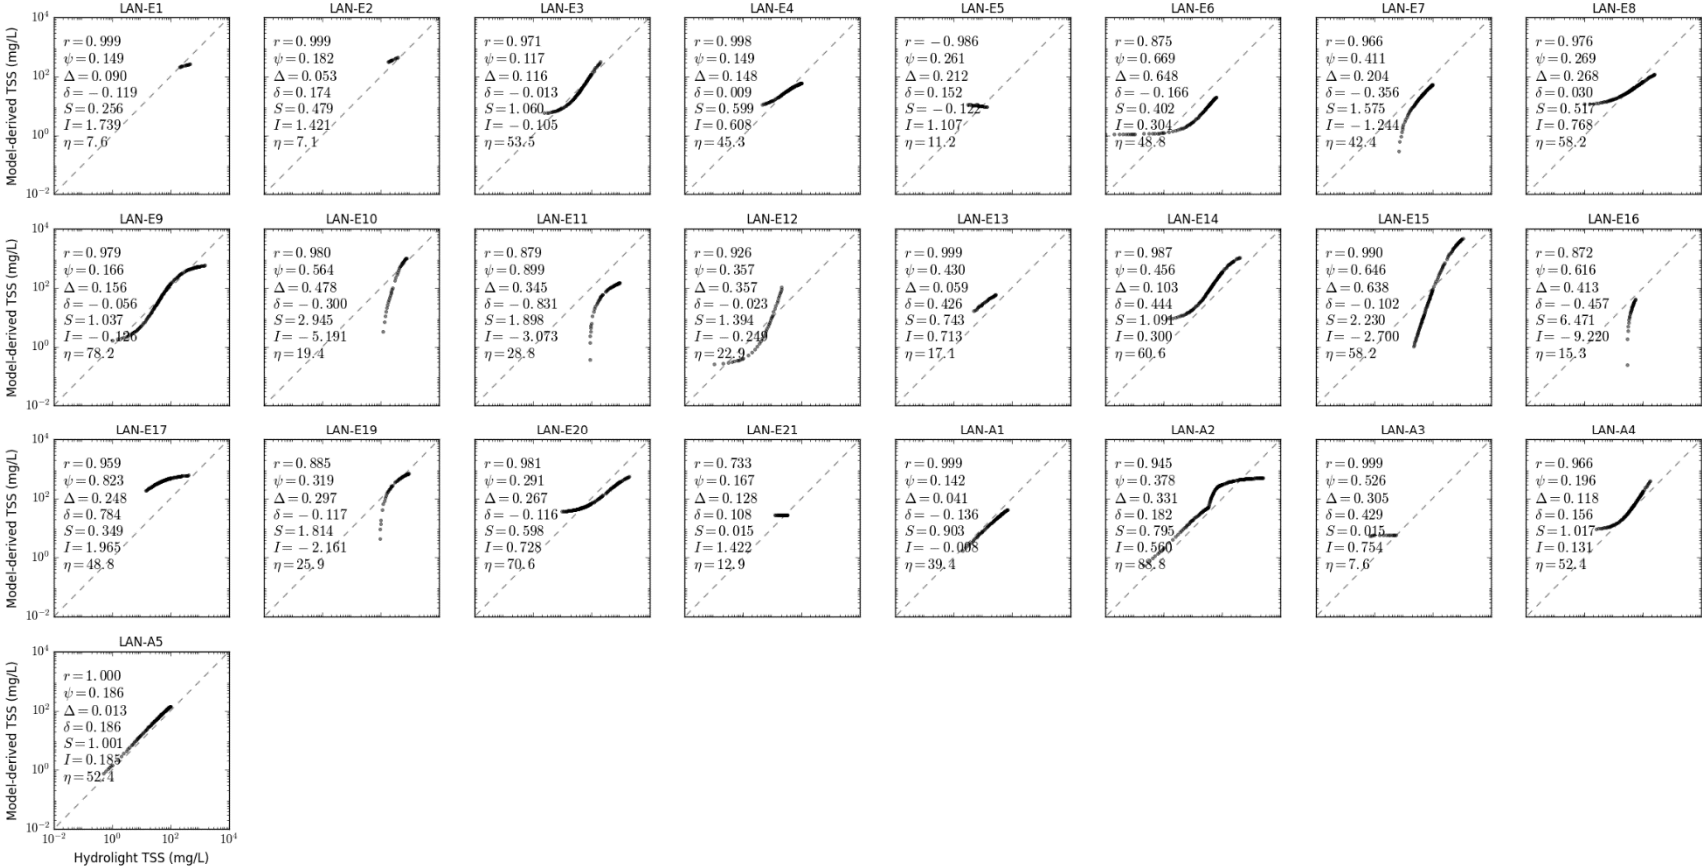

Figure S7.3. Scatter plot of LANDSAT TSS models in CLASS-II water for calcareous sand sediment,  $b_b/b$  ratio of 0.018, solar zenith angle of 30°.

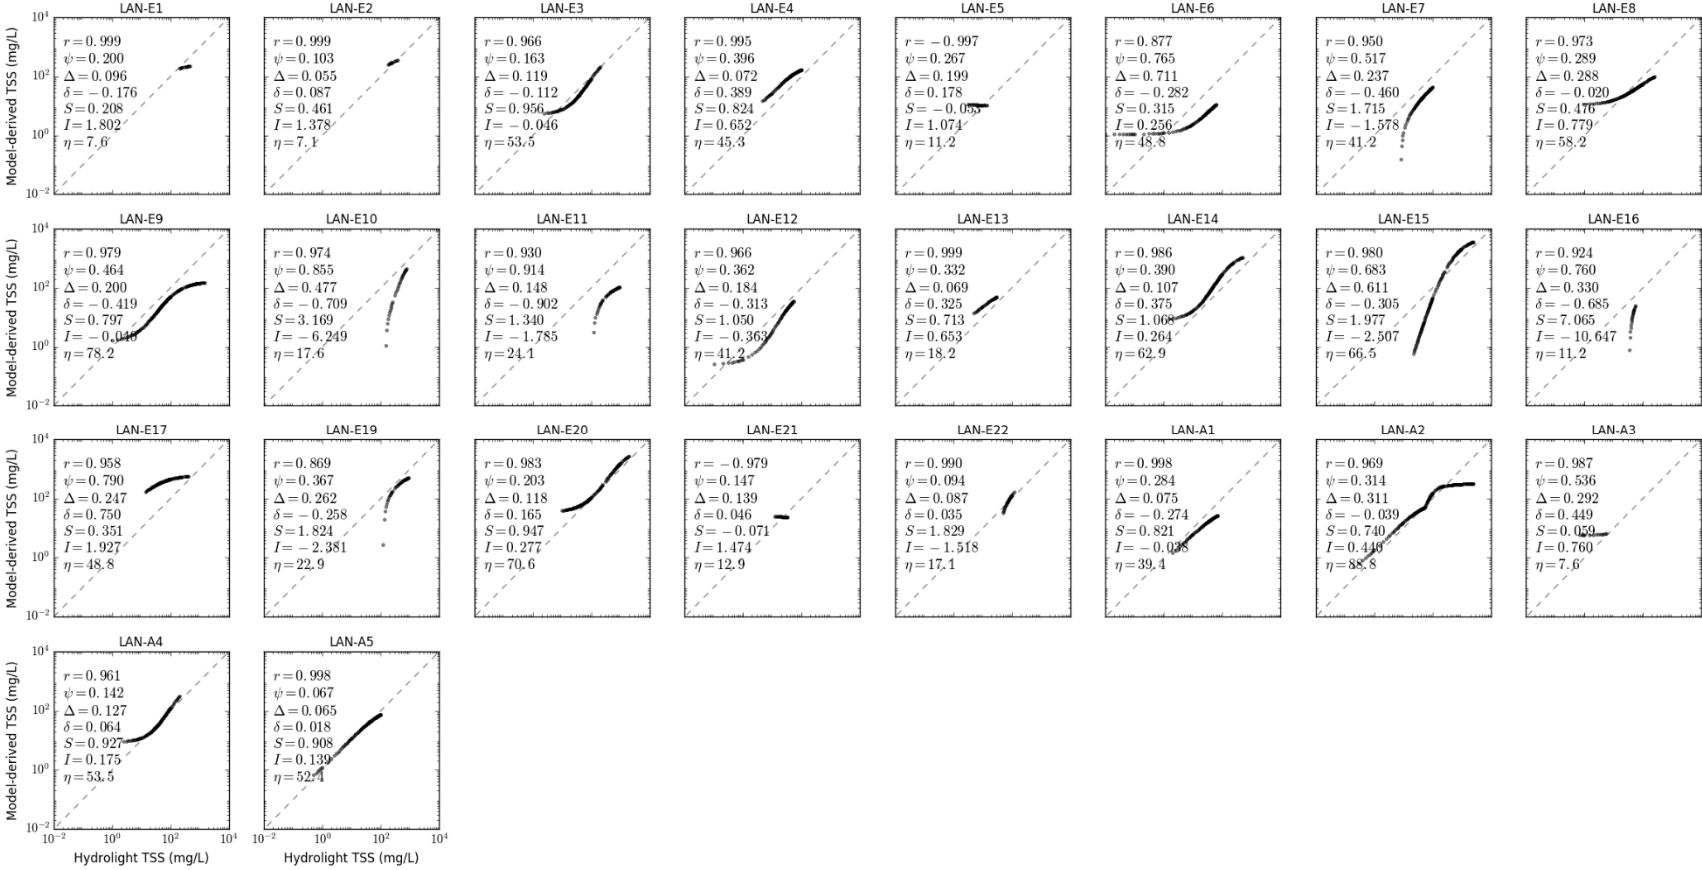

Figure S7.4. Scatter plot of LANDSAT TSS models in CLASS-II water for red clay sediment,  $b_b/b$  ratio of 0.018, solar zenith angle of 30°.



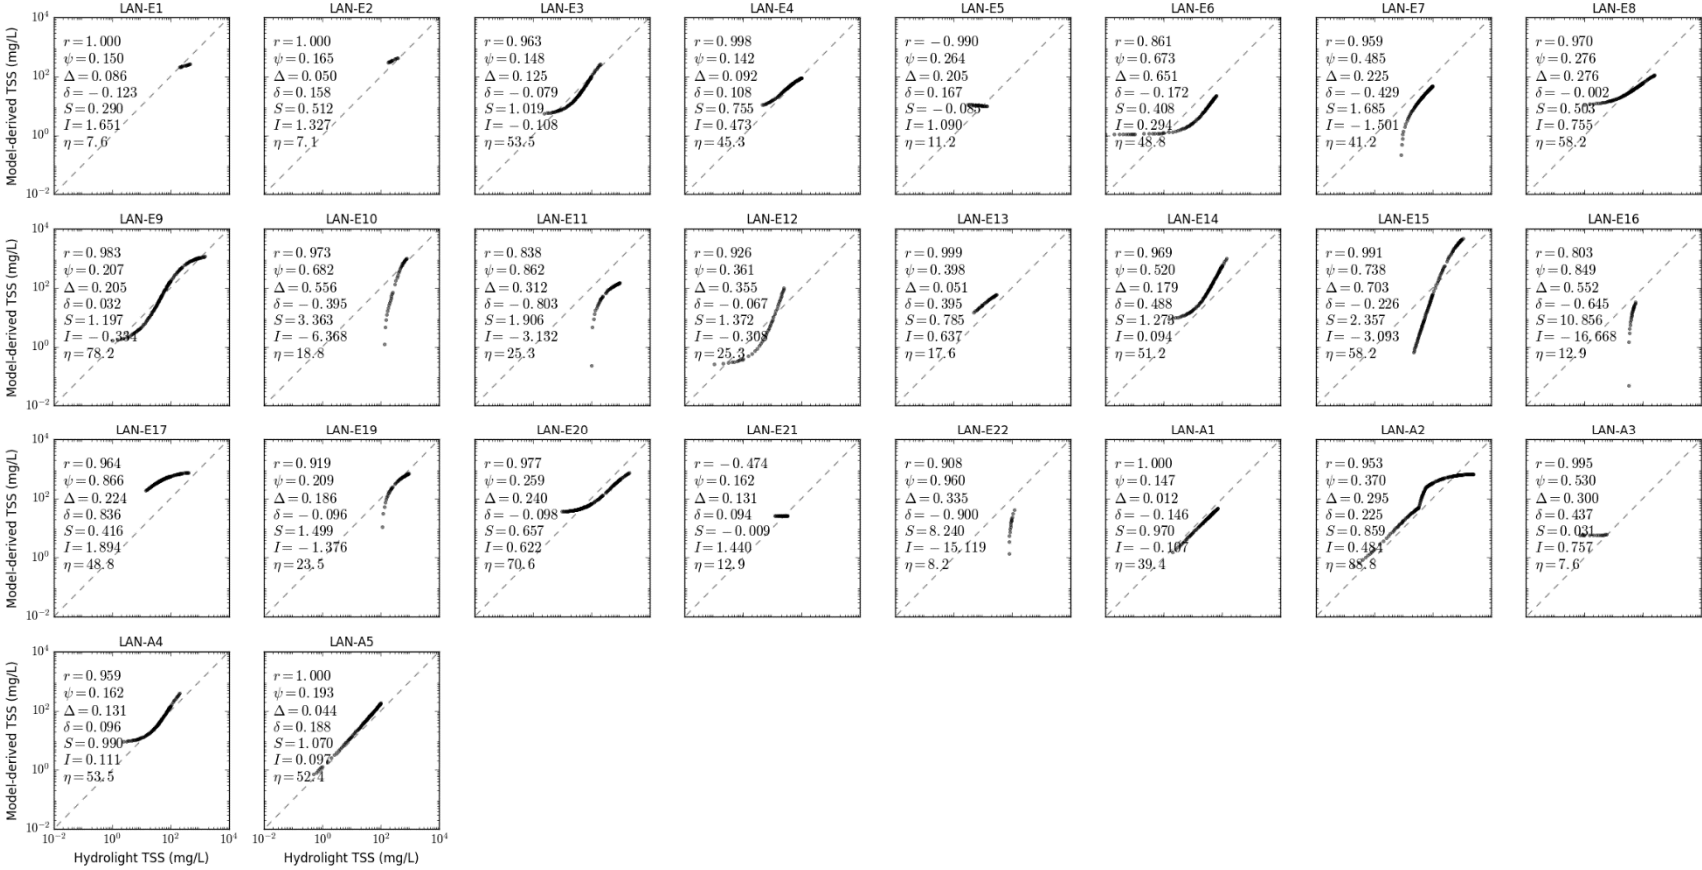

Figure S7.5. Scatter plot of LANDSAT TSS models in CLASS-II water for yellow clay sediment,  $b_b/b$  ratio of 0.018, solar zenith angle of  $30^\circ$ .

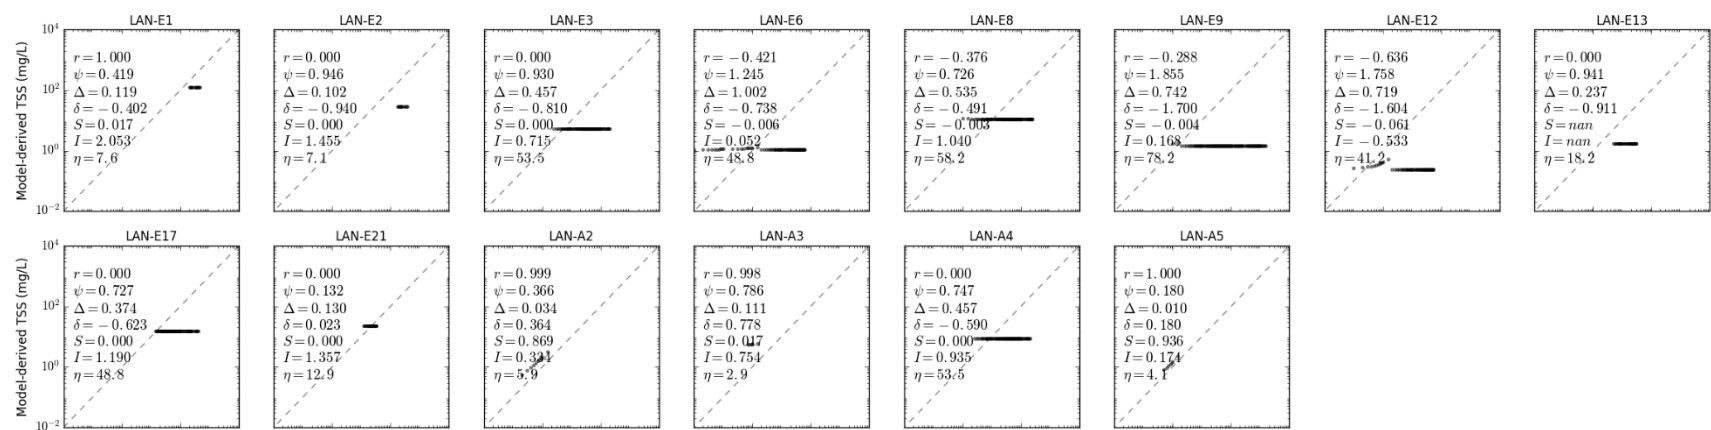

**Figure S7.6.** Scatter plot of LANDSAT TSS models in CLASS-II water for calcareous sand sediment,  $b_b/b$  ratio of 0.001, solar zenith angle of 30°.

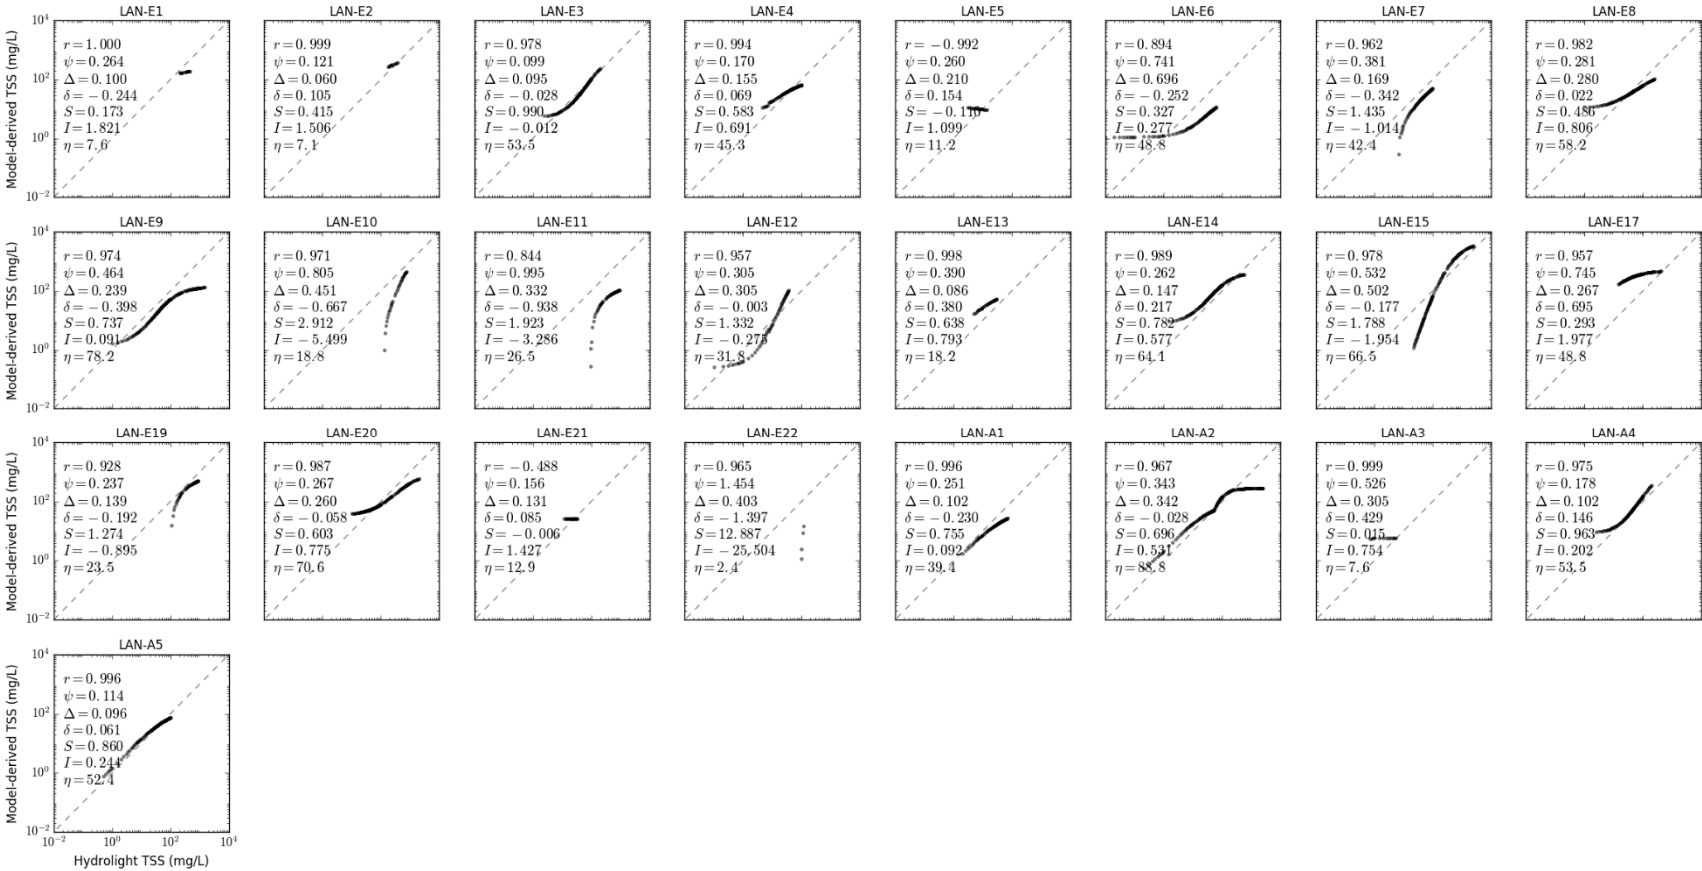

Figure S7.7. Scatter plot of LANDSAT TSS models in CLASS-II water for calcareous sand sediment,  $b_b/b$  ratio of 0.01, solar zenith angle of  $30^\circ$ .

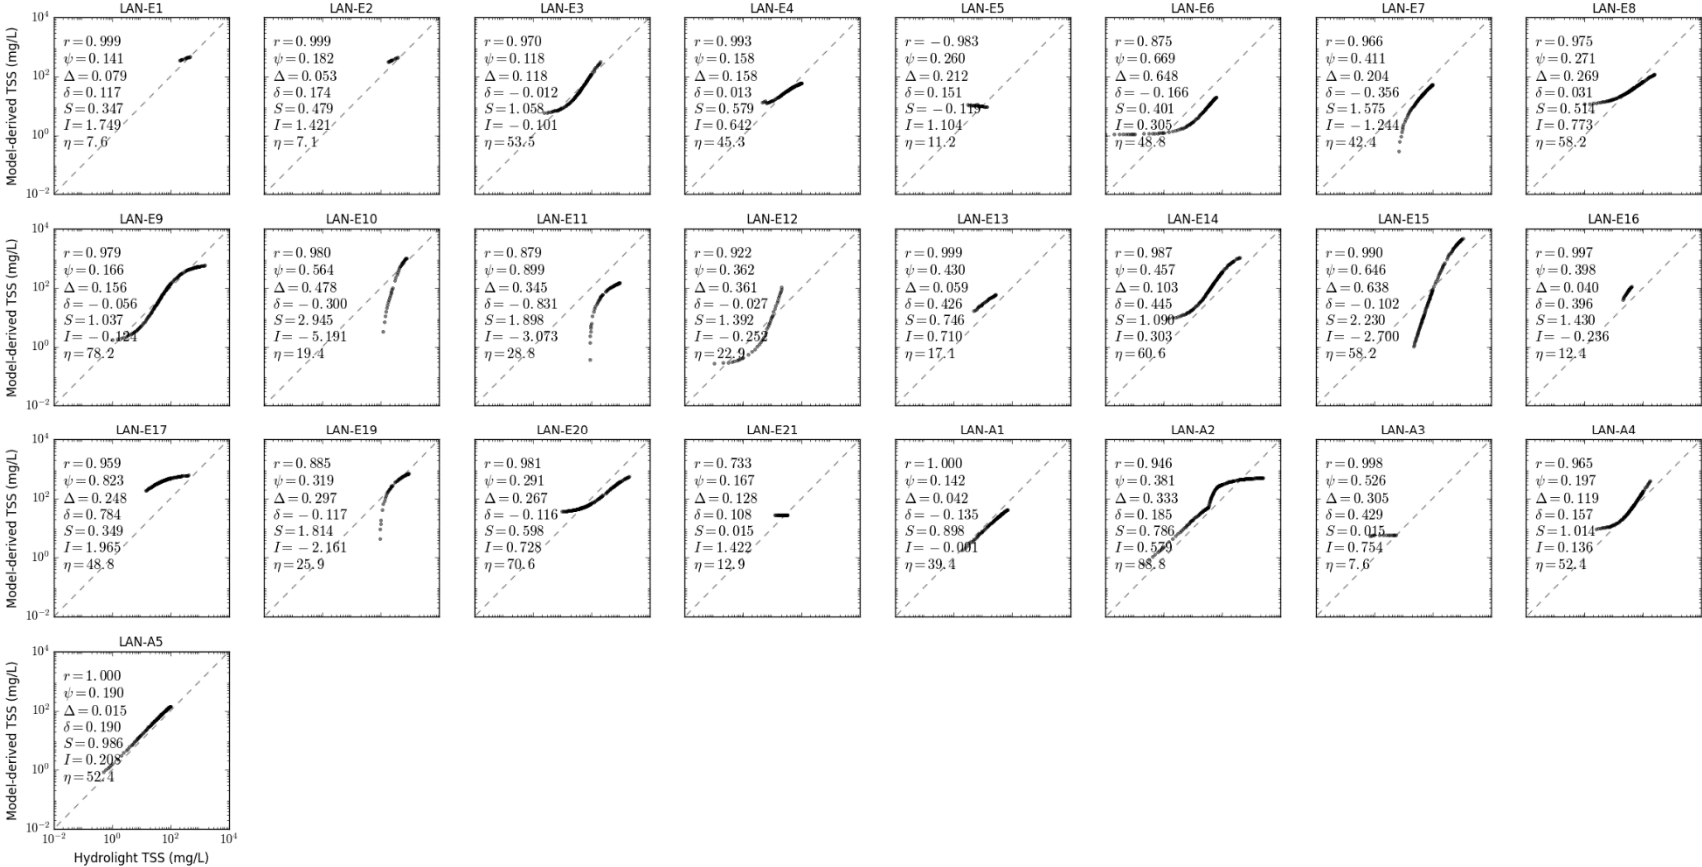

Figure S7.8. Scatter plot of LANDSAT TSS models in CLASS-II water for calcareous sand sediment,  $b_b/b$  ratio of 0.05, solar zenith angle of 30°.

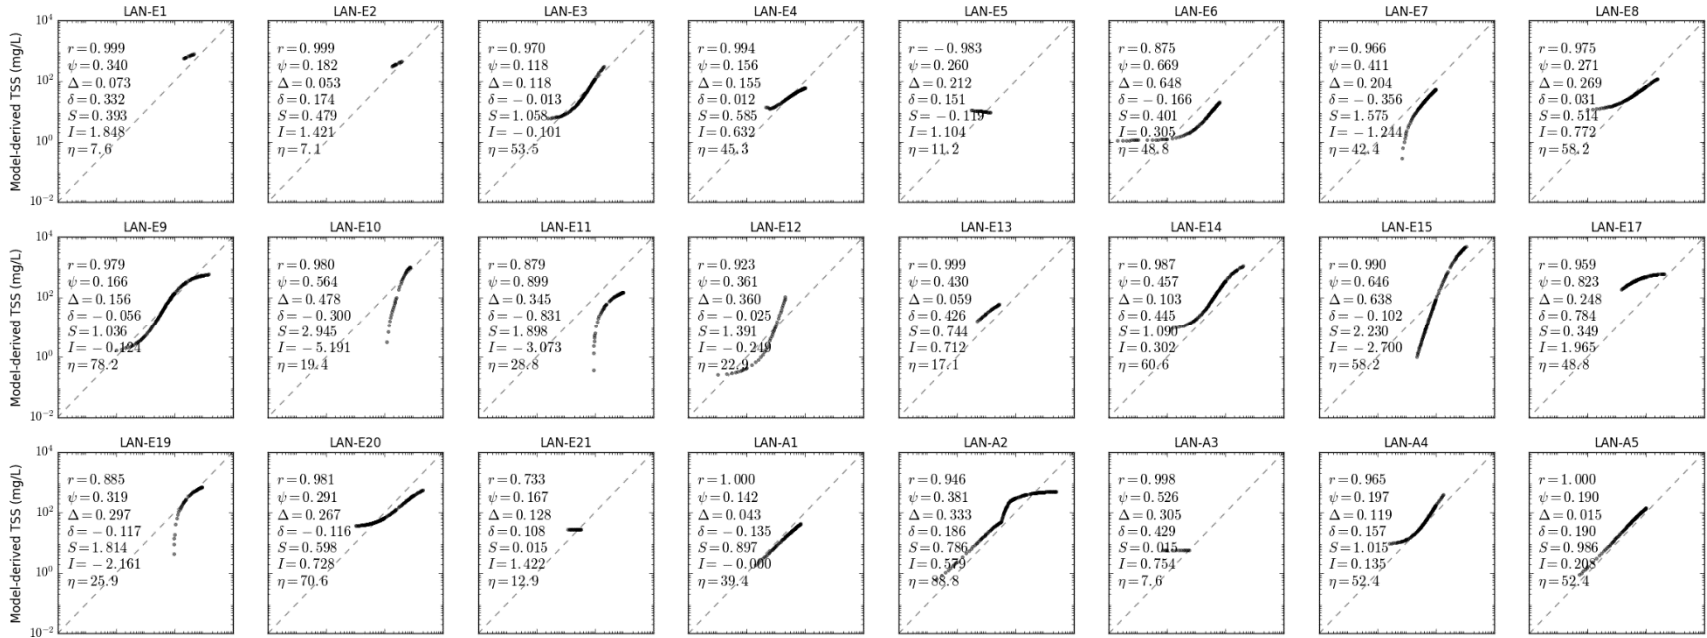

Figure S7.9. Scatter plot of LANDSAT TSS models in CLASS-II water for calcareous sand sediment,  $b_b/b$  ratio of 0.1, solar zenith angle of 30°.

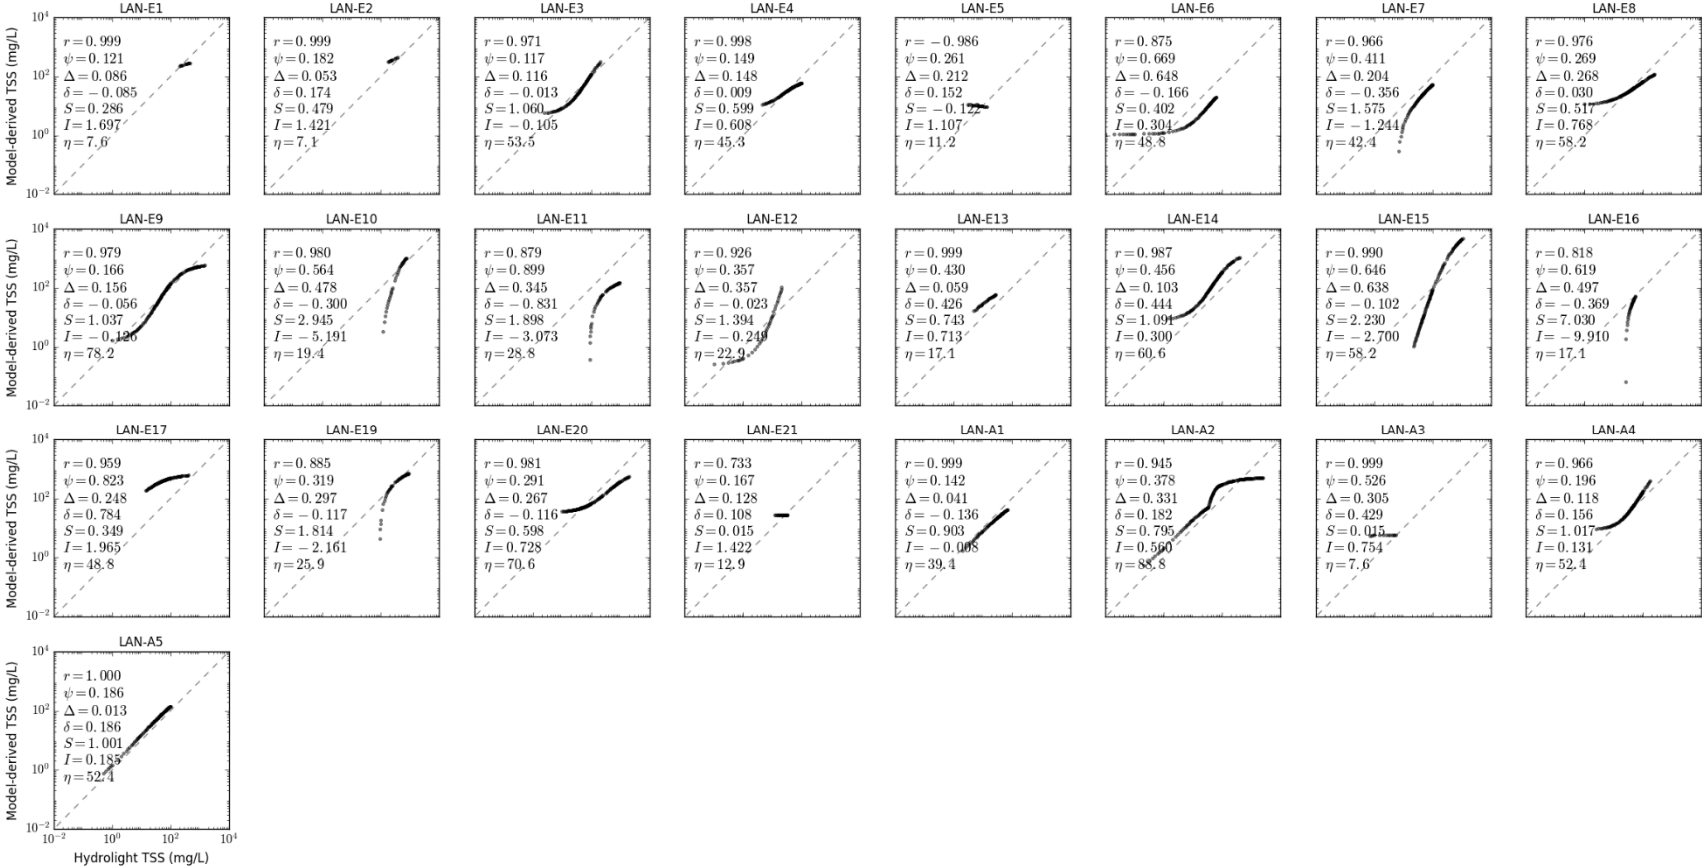

Figure S7.10. Scatter plot of LANDSAT TSS models in CLASS-II water for calcareous sand sediment,  $b_b/b$  ratio of 0.018, solar zenith angle of 15°.

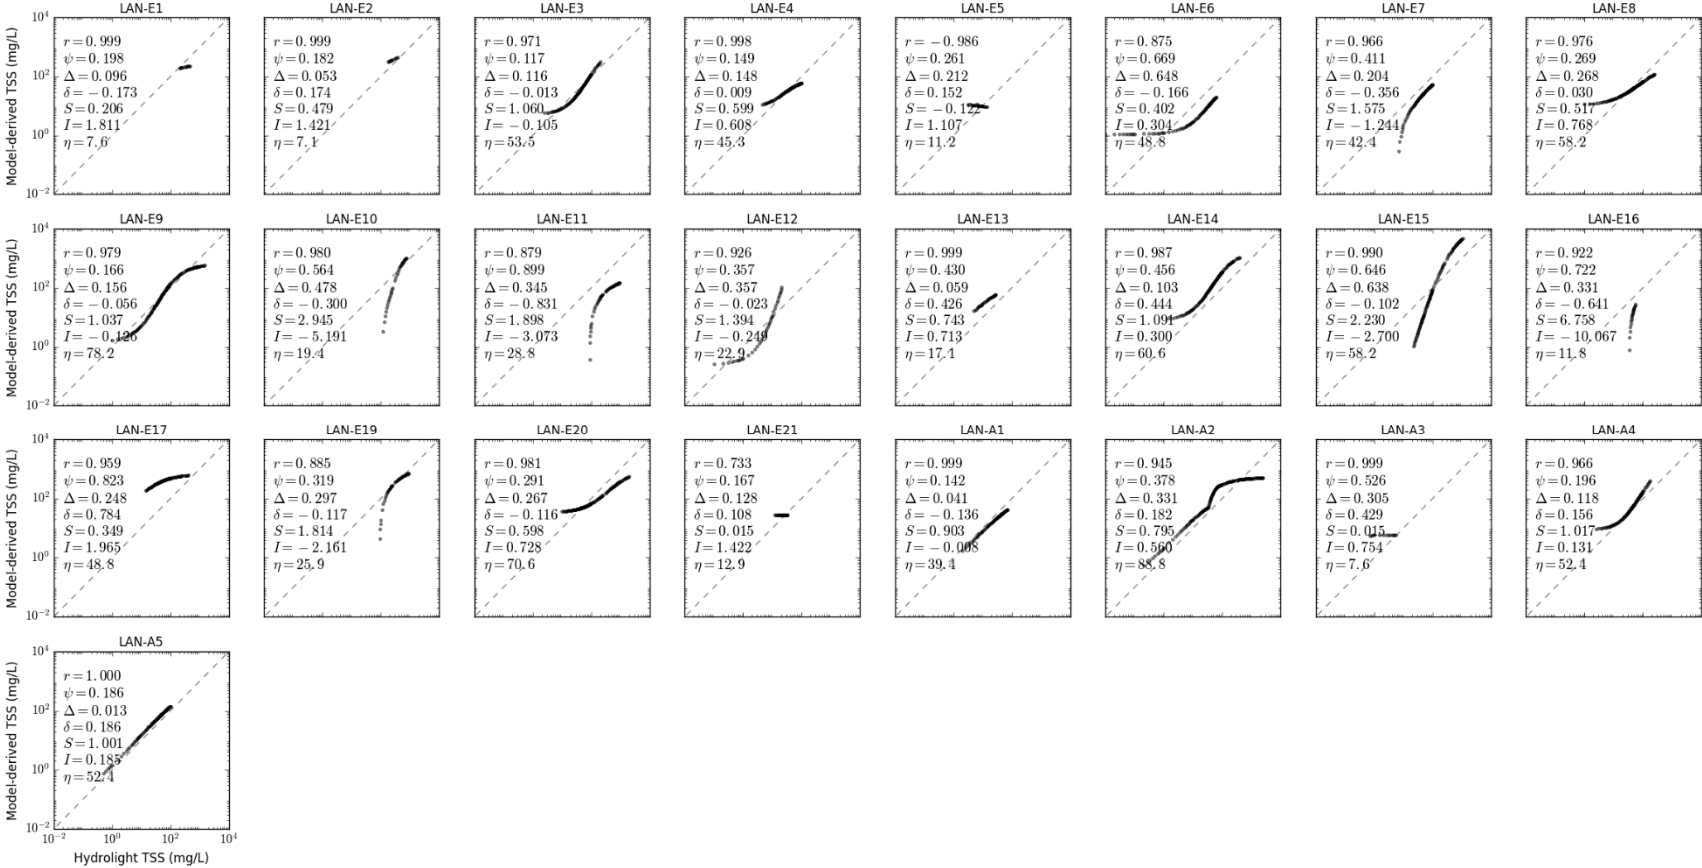

Figure S7.11. Scatter plot of LANDSAT TSS models in CLASS-II water for calcareous sand sediment,  $b_b/b$  ratio of 0.018, solar zenith angle of 45°.

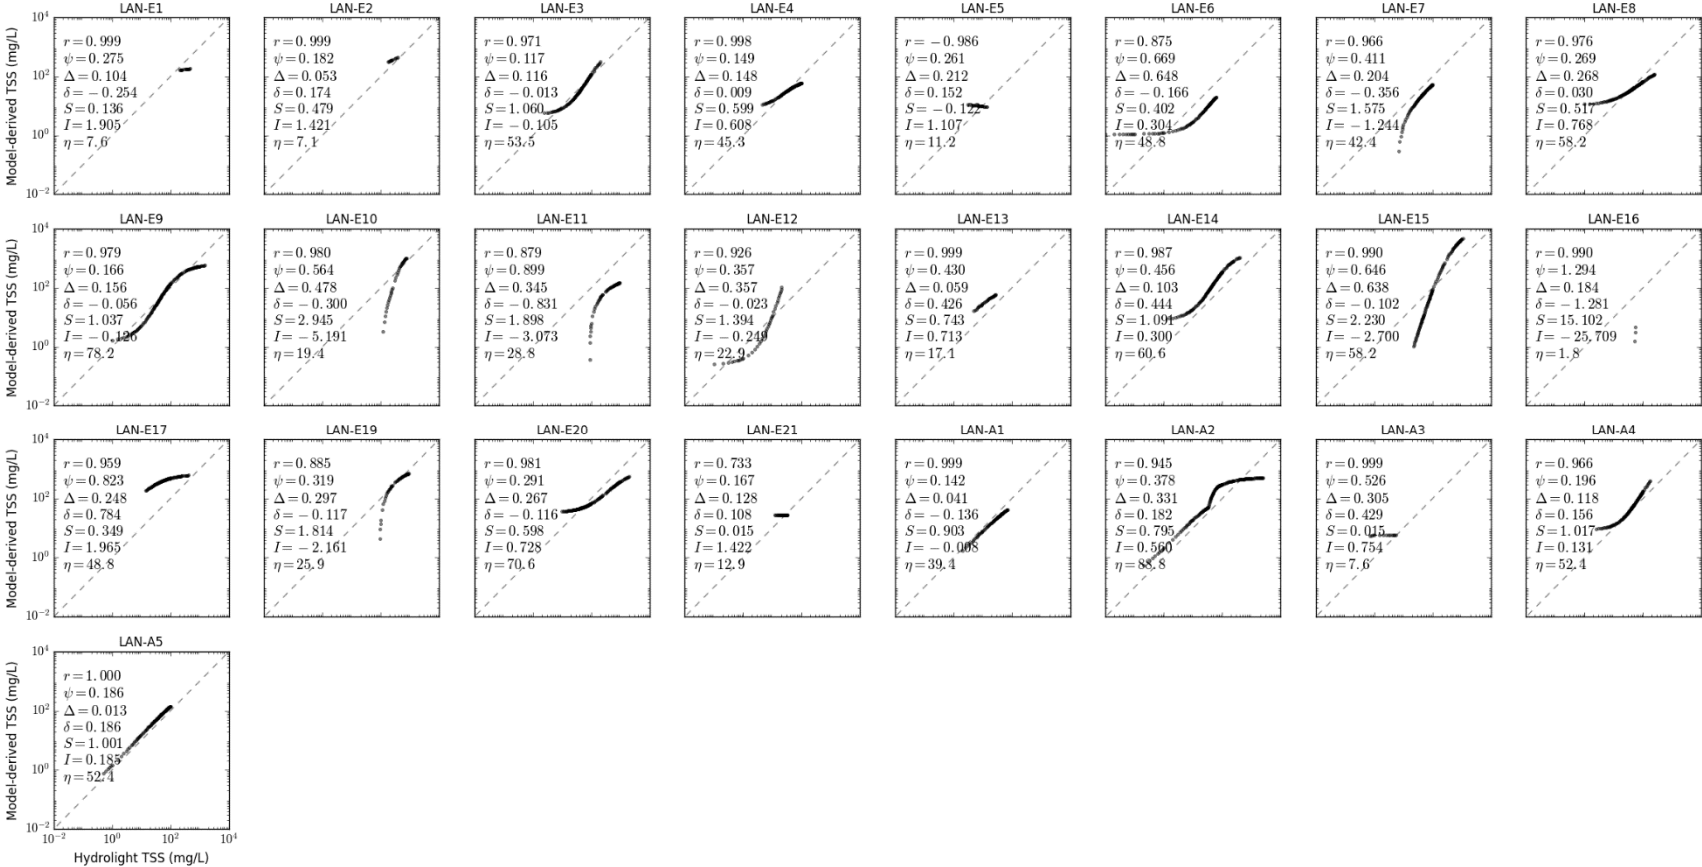

Figure S7.12. Scatter plot of LANDSAT TSS models in CLASS-II water for calcareous sand sediment,  $b_b/b$  ratio of 0.018, solar zenith angle of  $60^\circ$ .



Supplementary Materials S8. Scatter Plot of LANDSAT TSS Models for CLASS-III Water

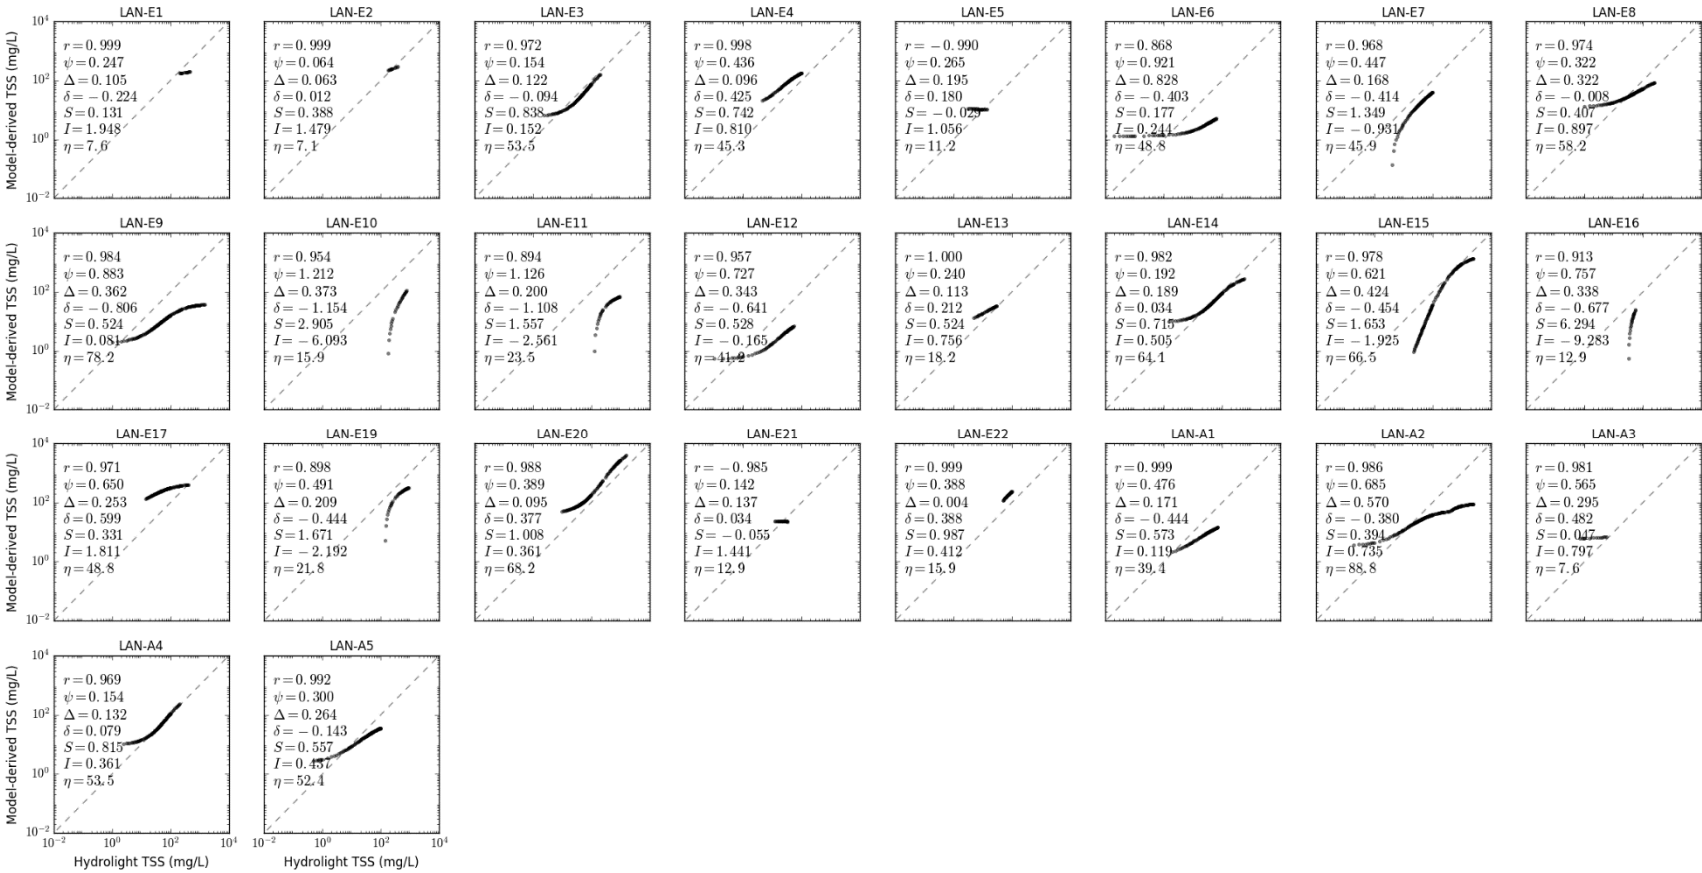

Figure S8.1. Scatter plot of LANDSAT TSS models in CLASS-III water for brown earth sediment,  $b_b/b$  ratio of 0.018, solar zenith angle of 30°.

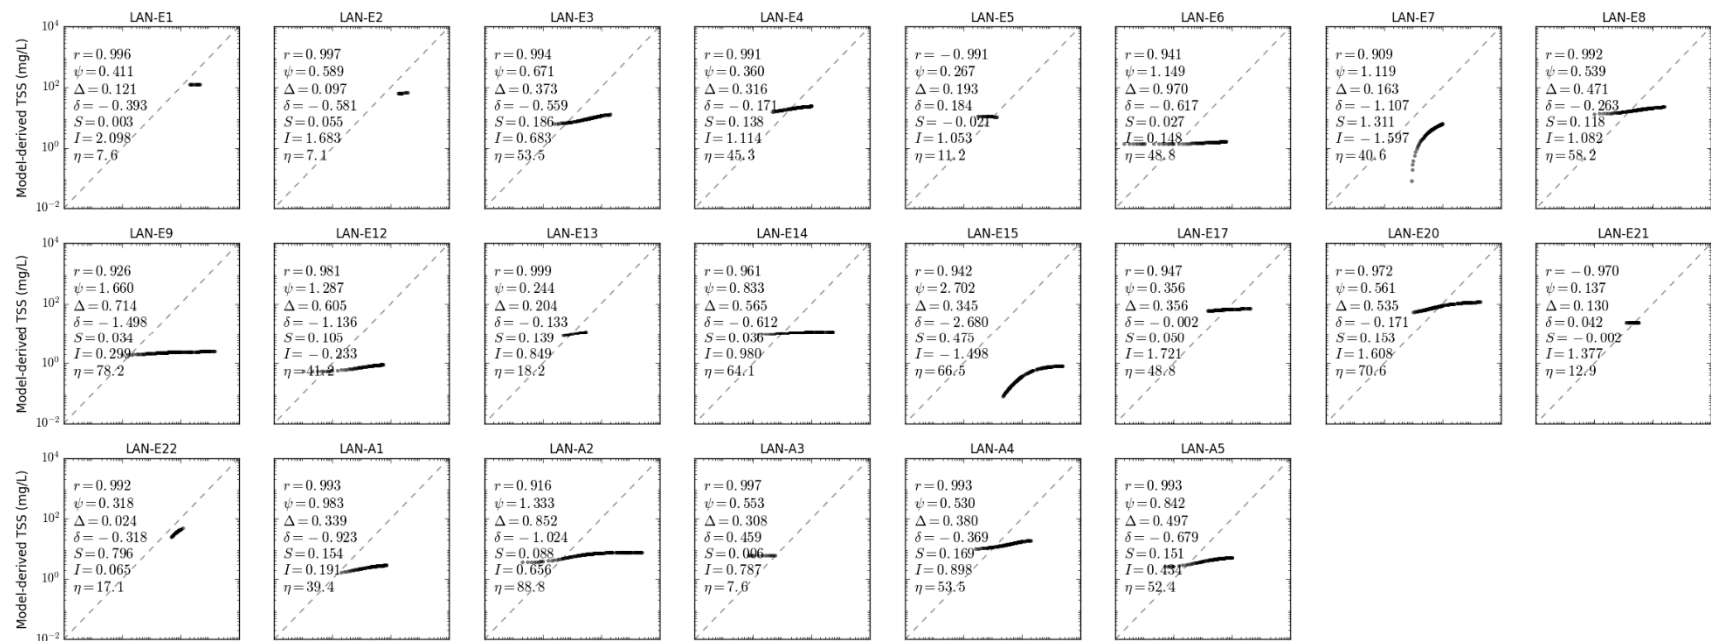

Figure S8.2. Scatter plot of LANDSAT TSS models in CLASS-III water for bukata sediment,  $b_b/b$  ratio of 0.018, solar zenith angle of 30°.

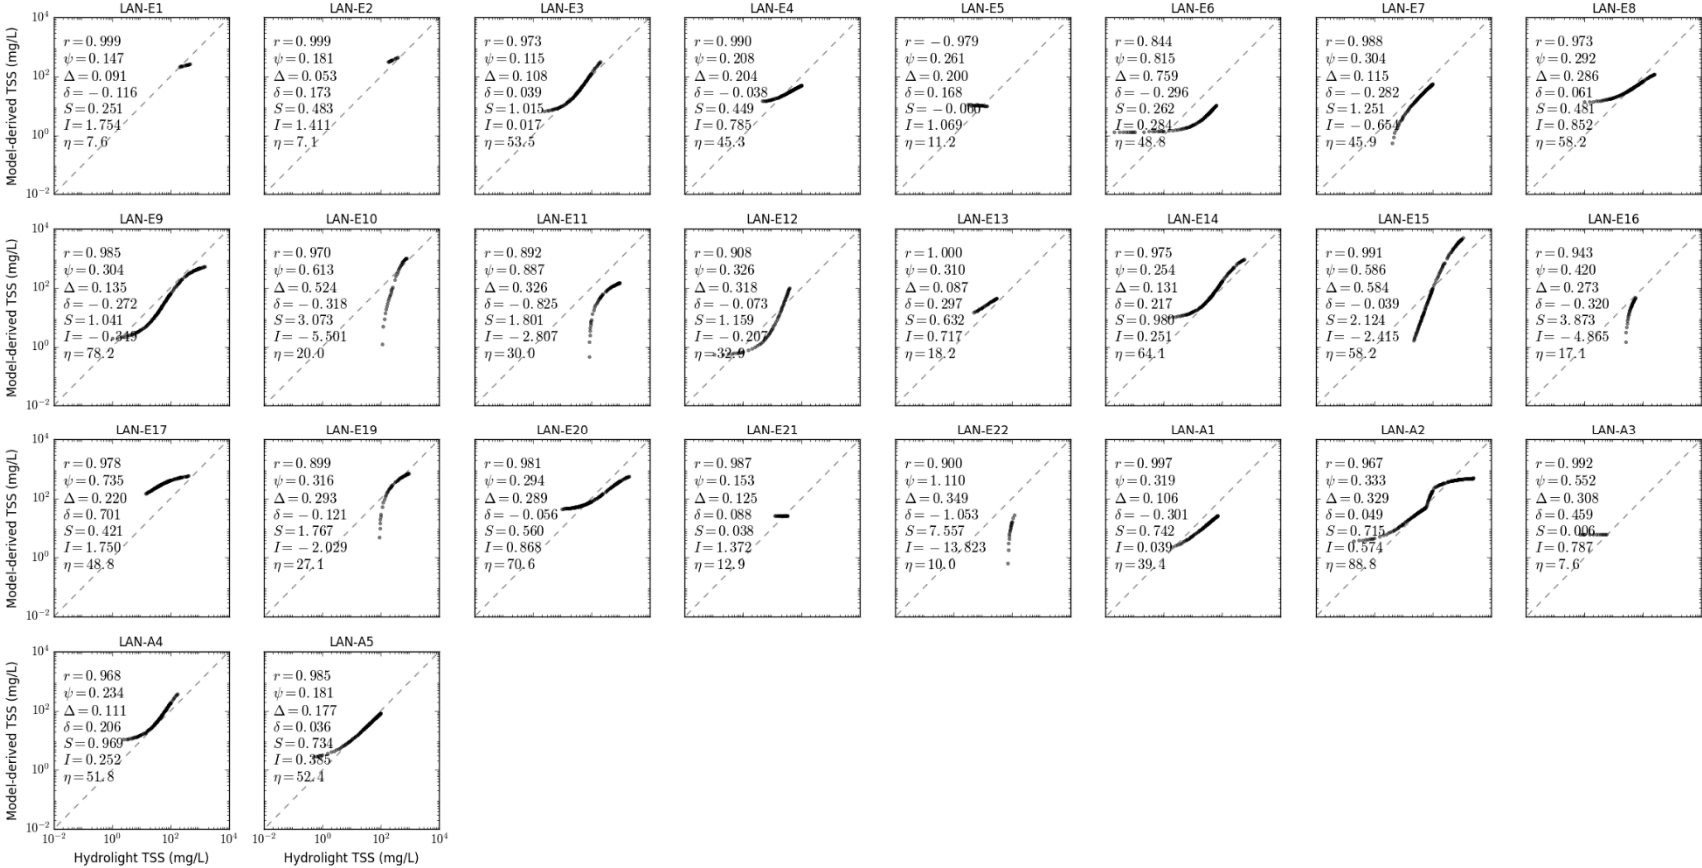

Figure S8.3. Scatter plot of LANDSAT TSS models in CLASS-III water for calcareous sand sediment,  $b_b/b$  ratio of 0.018, solar zenith angle of 30°.

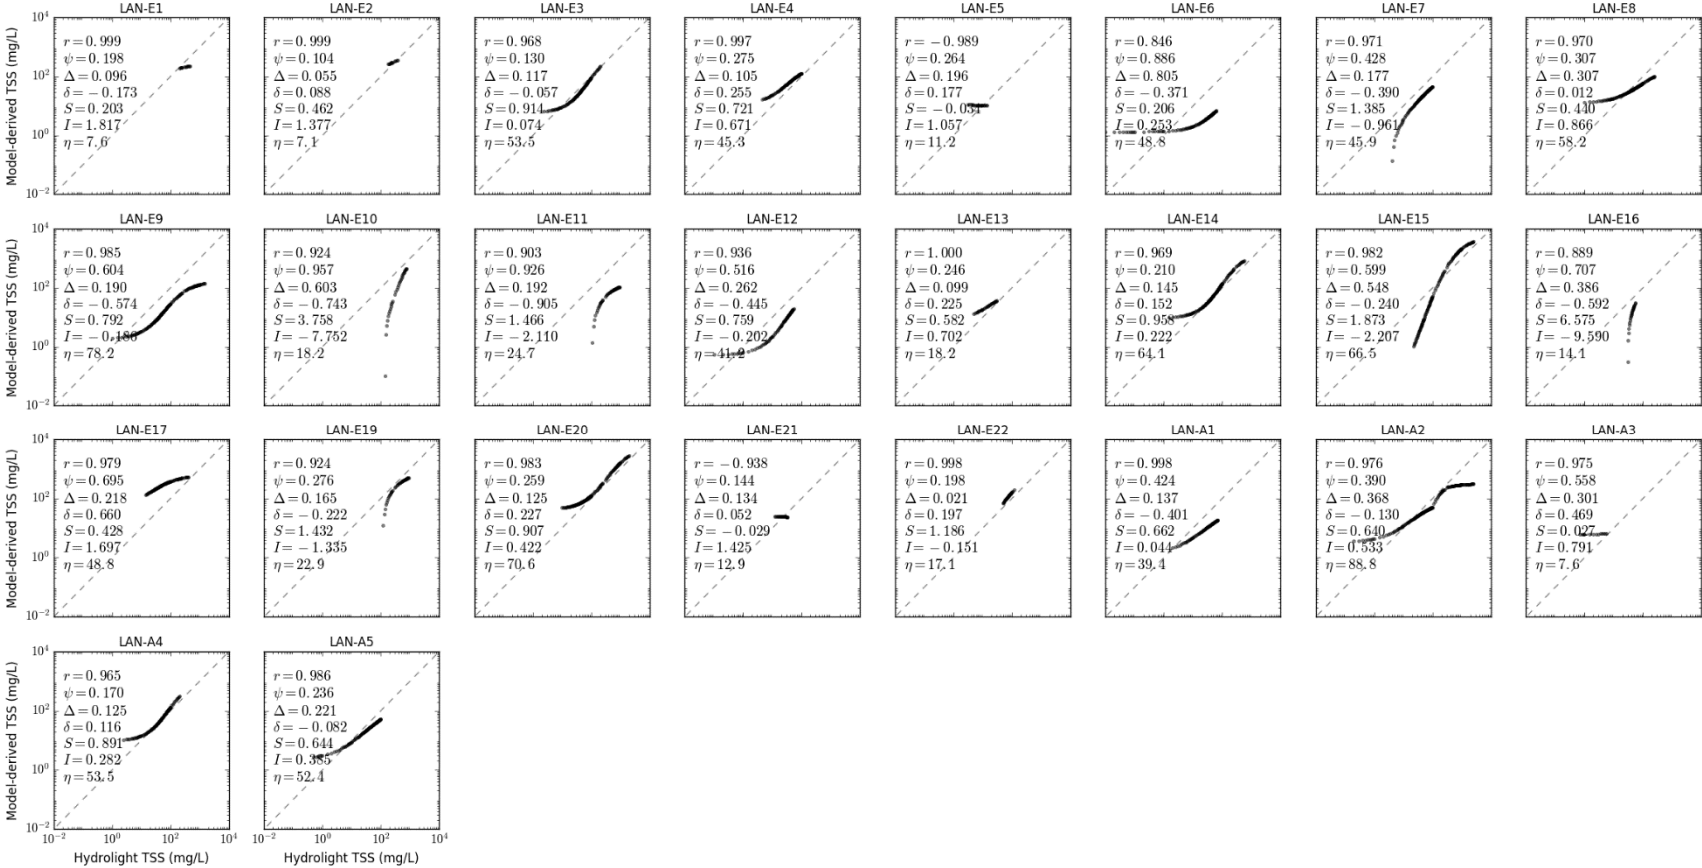

Figure S8.4. Scatter plot of LANDSAT TSS models in CLASS-III water for red clay sediment,  $b_b/b$  ratio of 0.018, solar zenith angle of  $30^\circ$ .

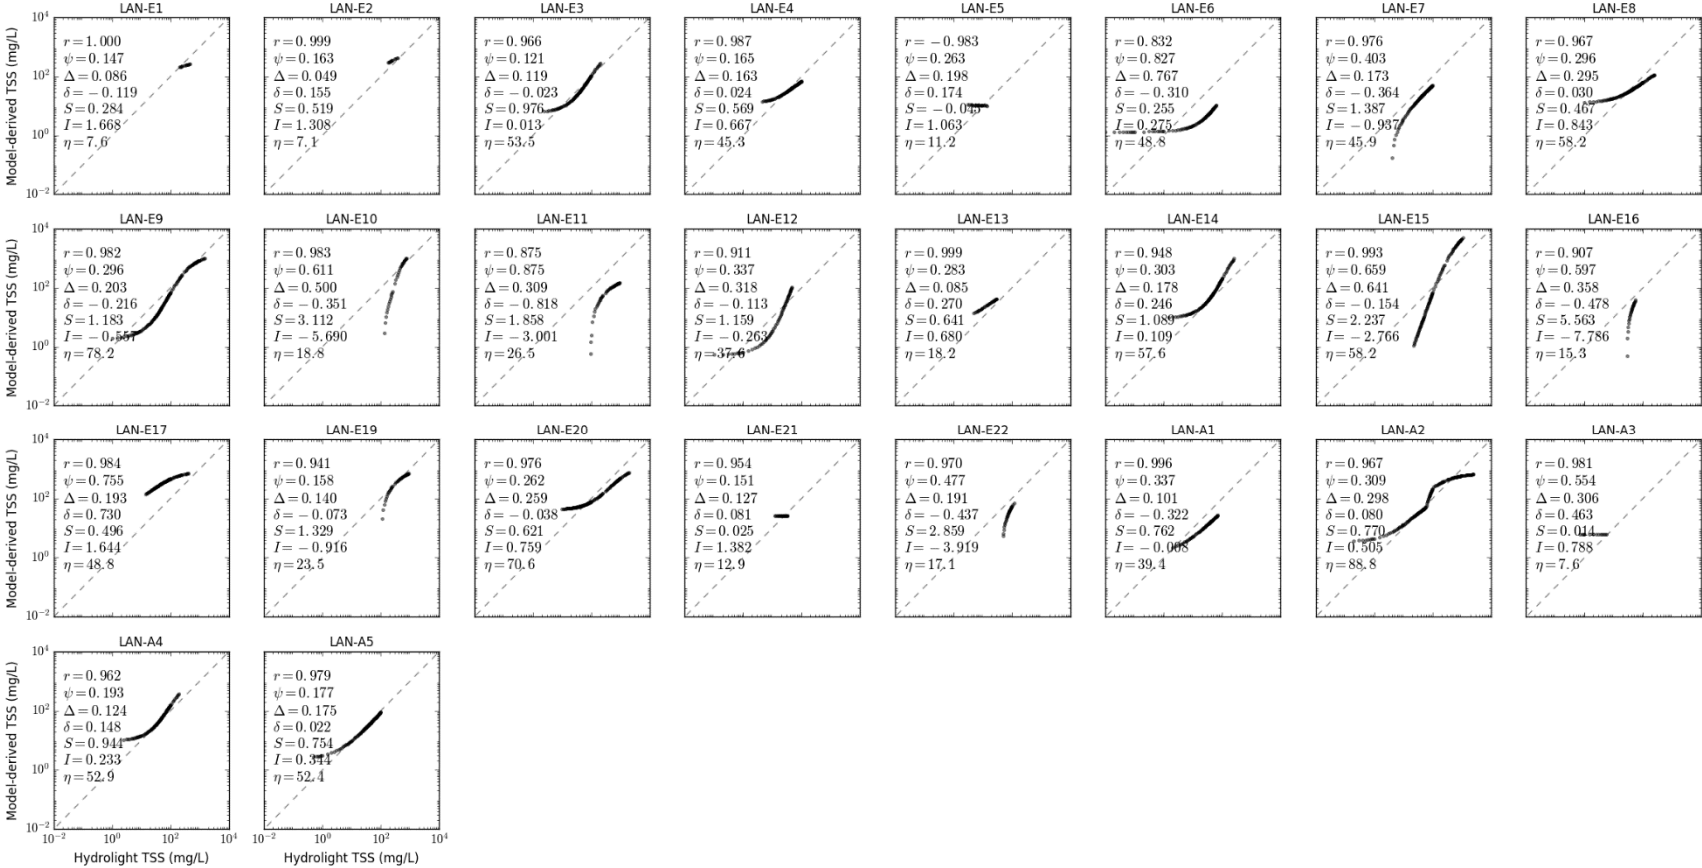

Figure S8.5. Scatter plot of LANDSAT TSS models in CLASS-III water for yellow clay sediment,  $b_b/b$  ratio of 0.018, solar zenith angle of 30°.

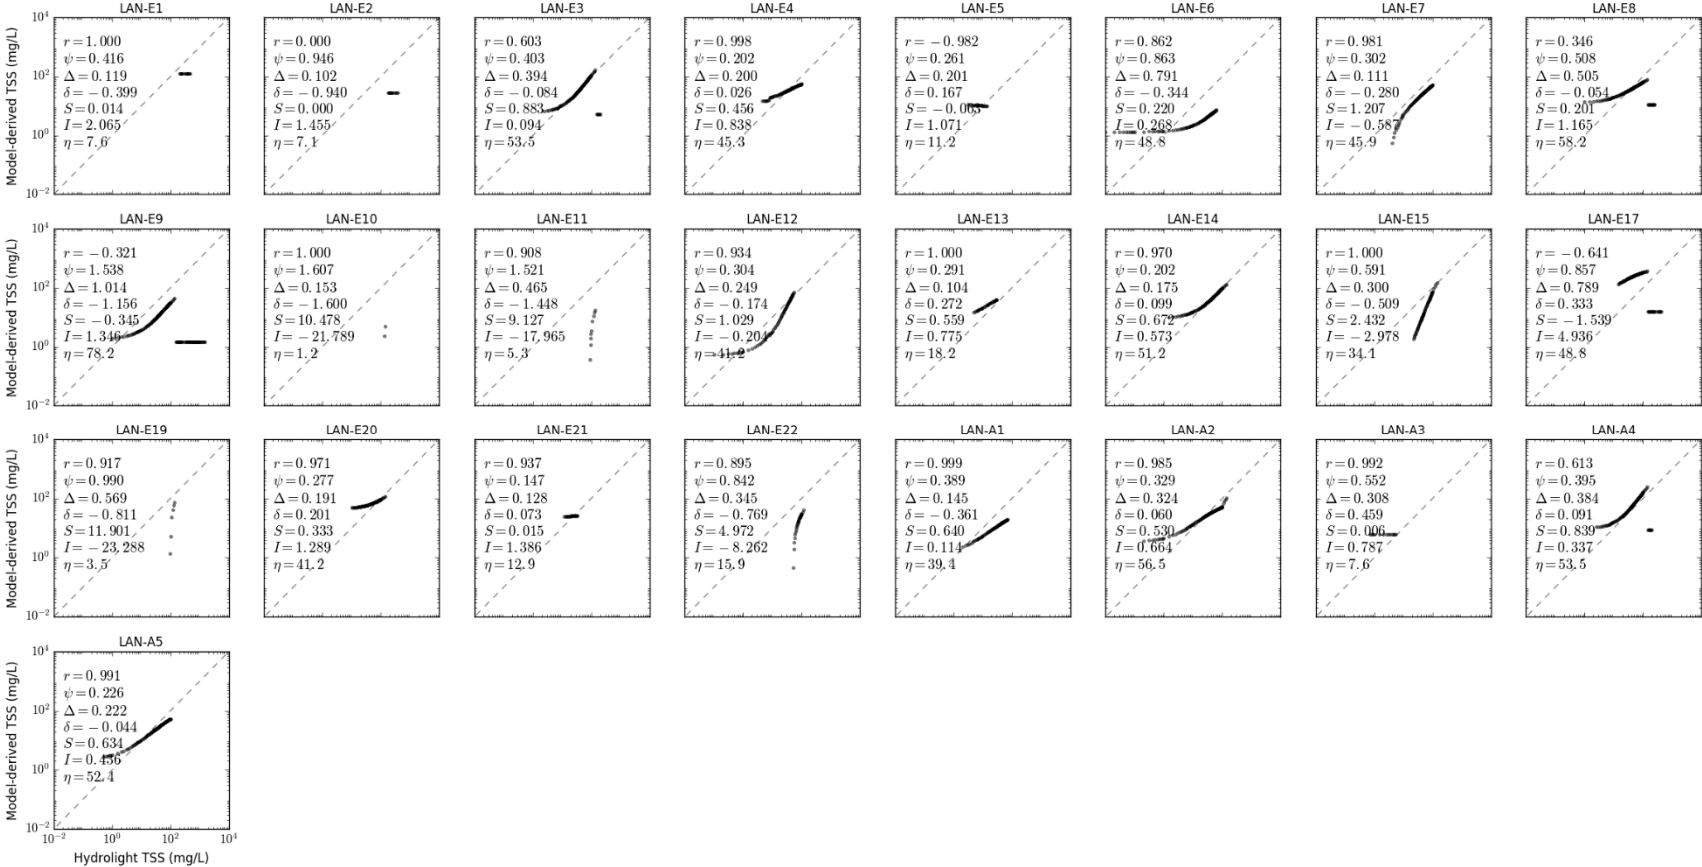

Figure S8.6. Scatter plot of LANDSAT TSS models in CLASS-III water for calcareous sand sediment,  $b_b/b$  ratio of 0.001, solar zenith angle of 30°.

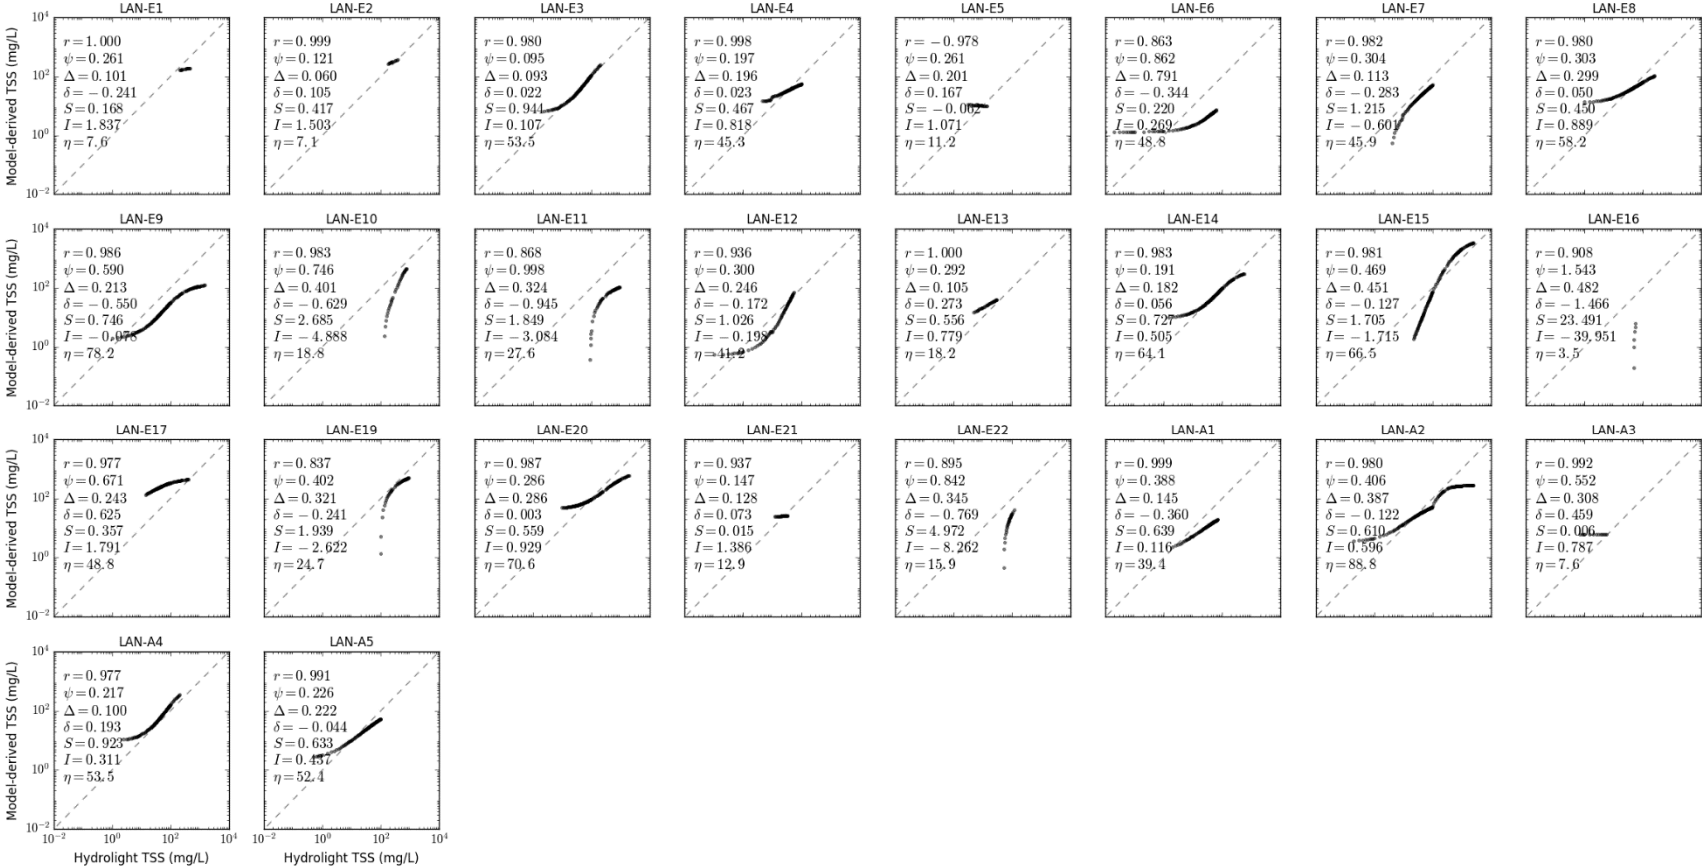

Figure S8.7. Scatter plot of LANDSAT TSS models in CLASS-III water for calcareous sand sediment,  $b_b/b$  ratio of 0.01, solar zenith angle of 30°.

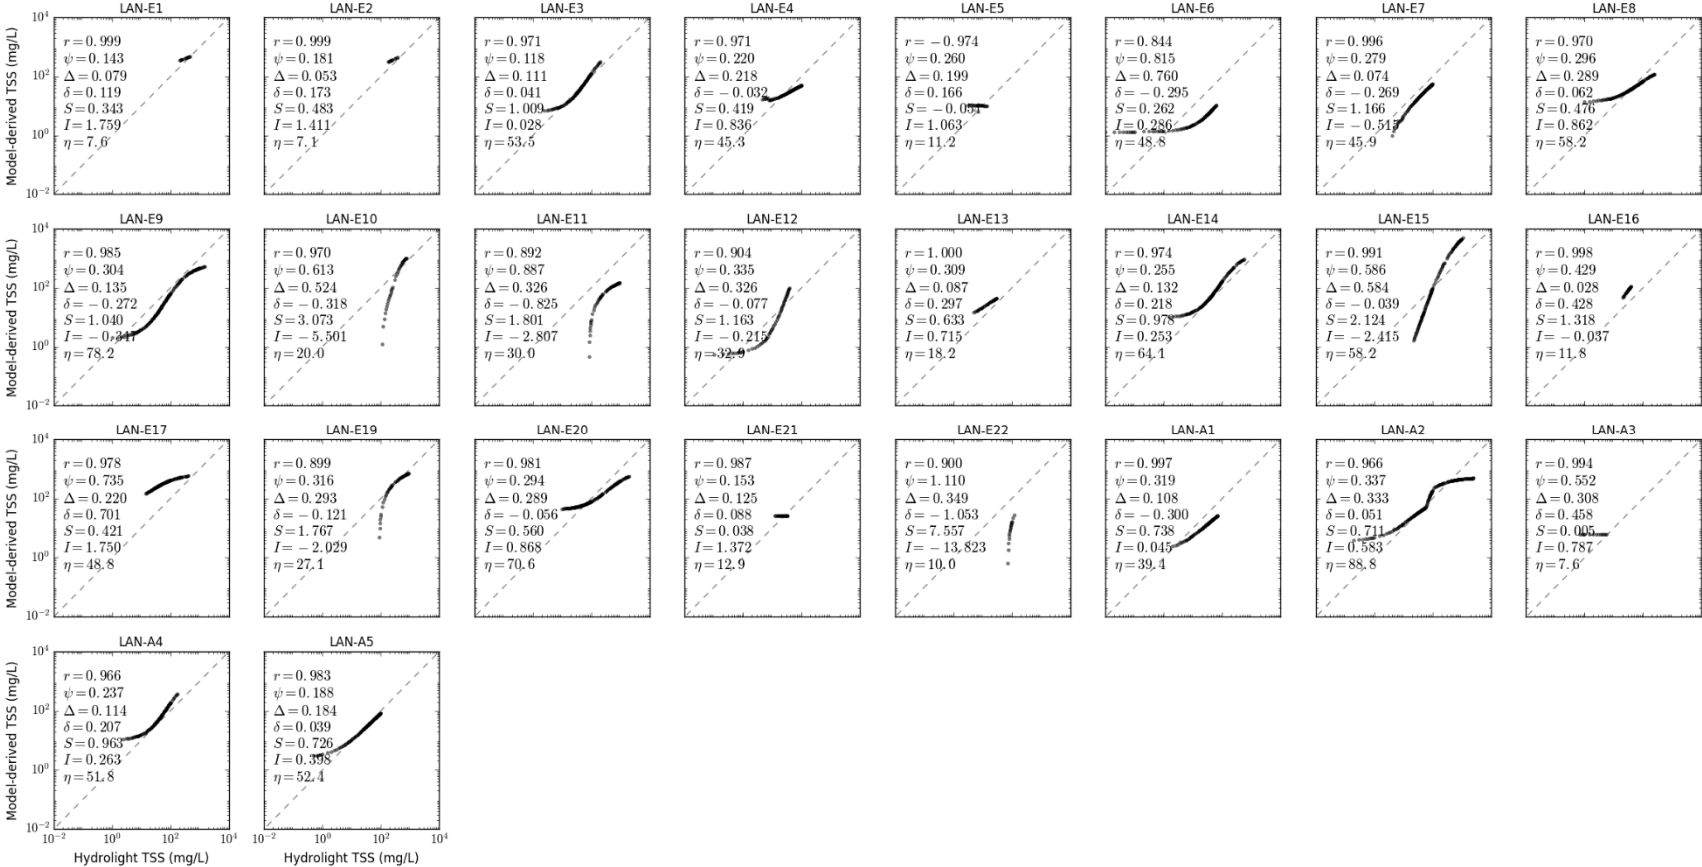

Figure S8.8. Scatter plot of LANDSAT TSS models in CLASS-III water for calcareous sand sediment,  $b_b/b$  ratio of 0.05, solar zenith angle of 30°.



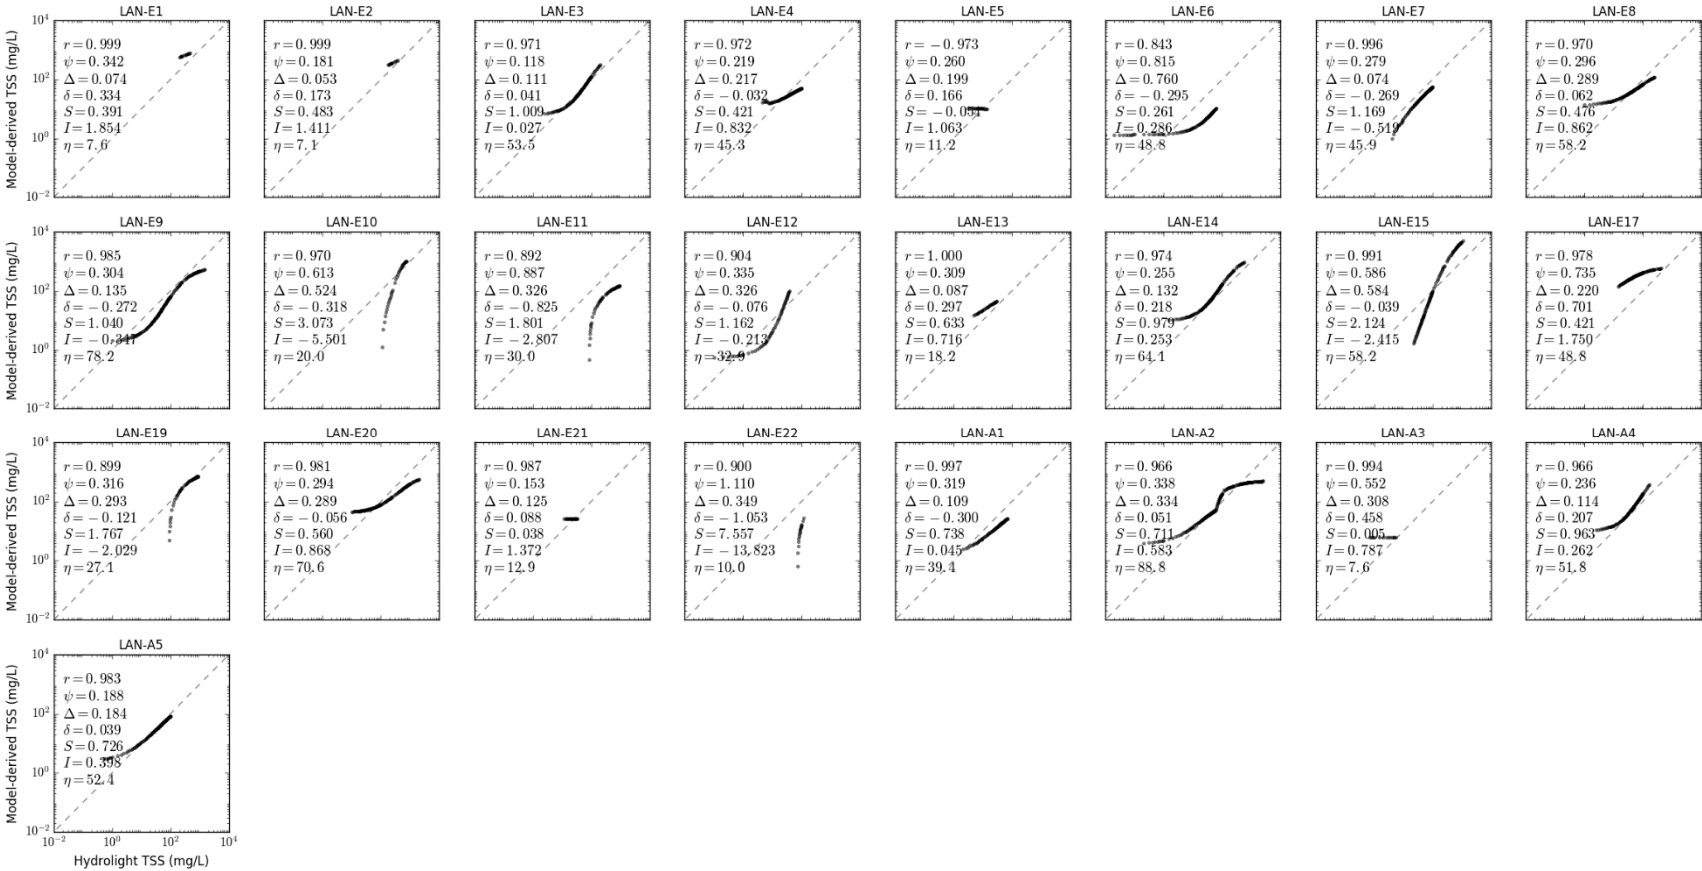

Figure S8.9. Scatter plot of LANDSAT TSS models in CLASS-III water for calcareous sand sediment,  $b_b/b$  ratio of 0.1, solar zenith angle of 30°.

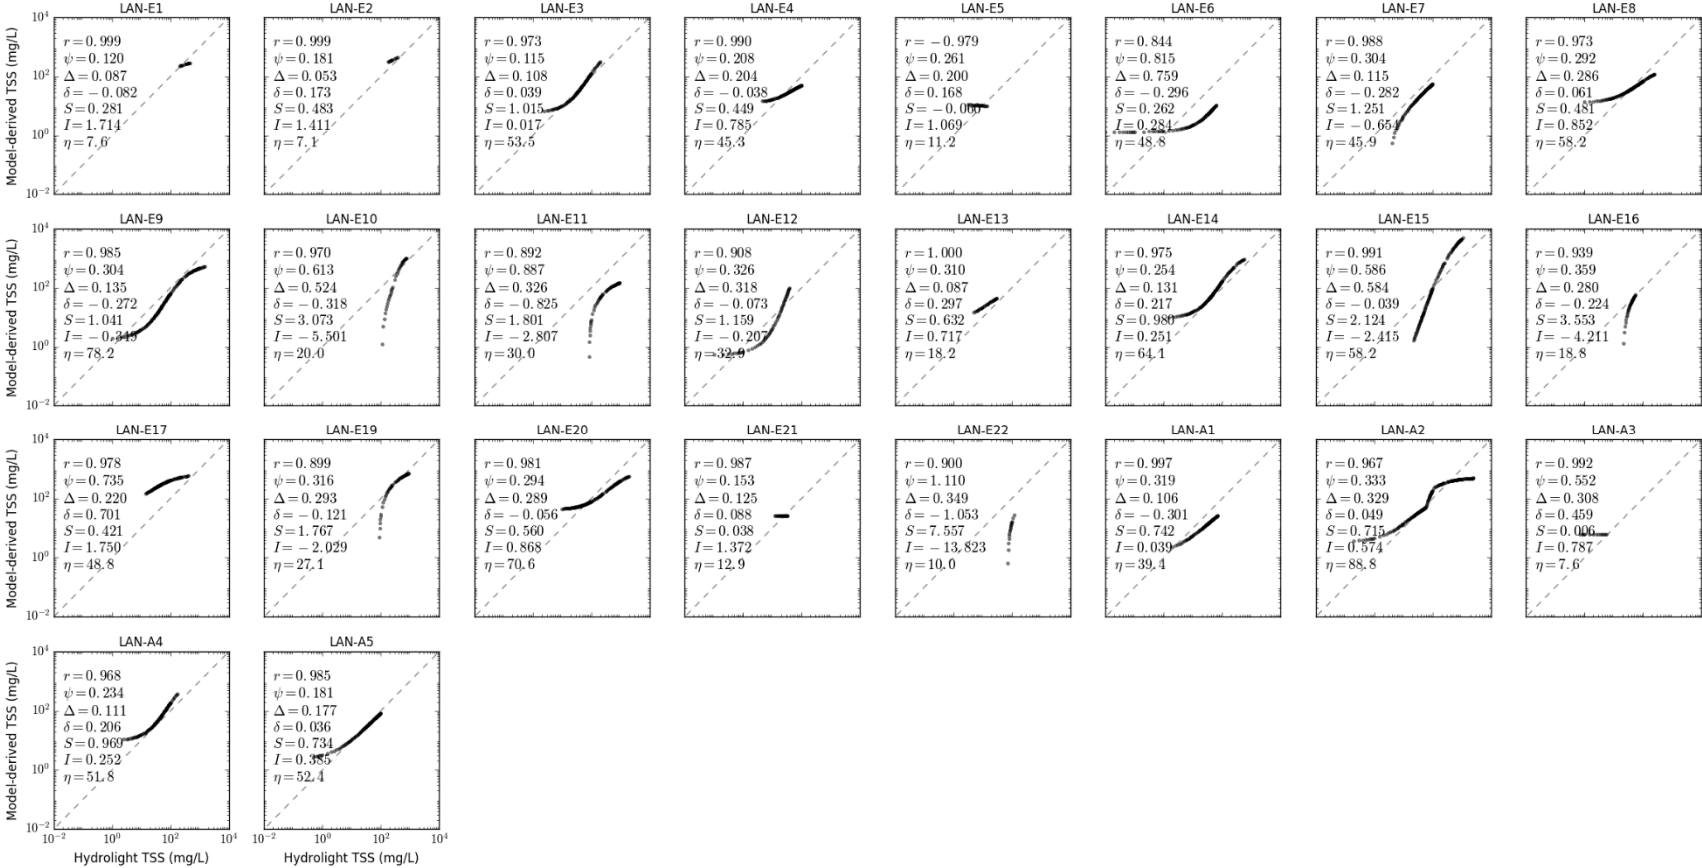

Figure S8.10. Scatter plot of LANDSAT TSS models in CLASS-III water for calcareous sand sediment,  $b_b/b$  ratio of 0.018, solar zenith angle of  $15^\circ$ .

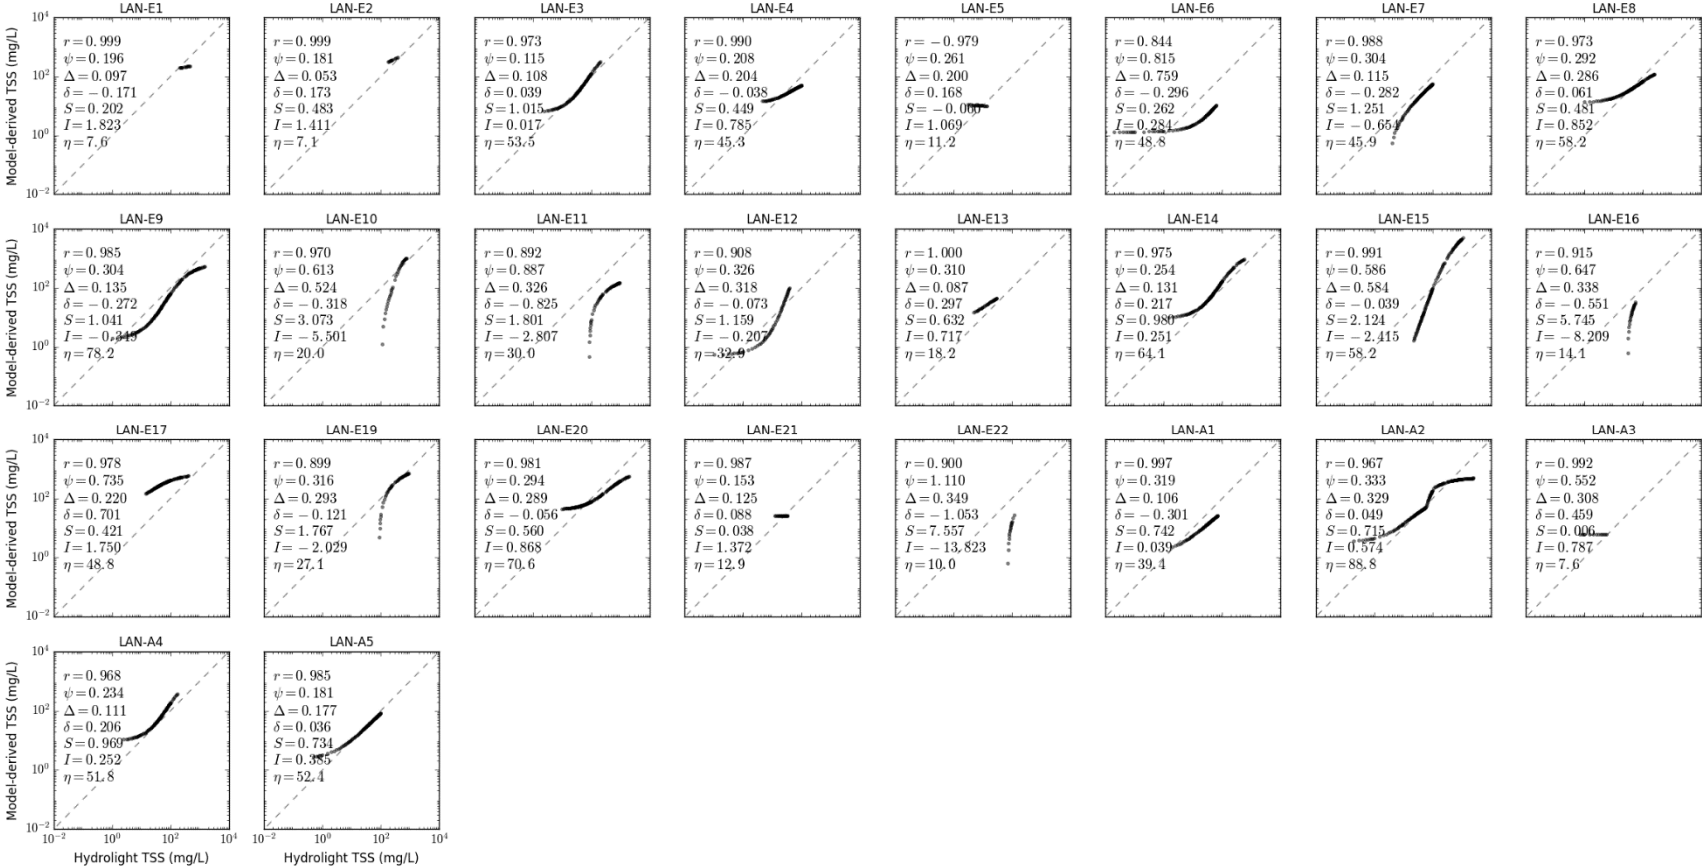

Figure S8.11. Scatter plot of LANDSAT TSS models in CLASS-III water for calcareous sand sediment,  $b_b/b$  ratio of 0.018, solar zenith angle of  $45^\circ$ .

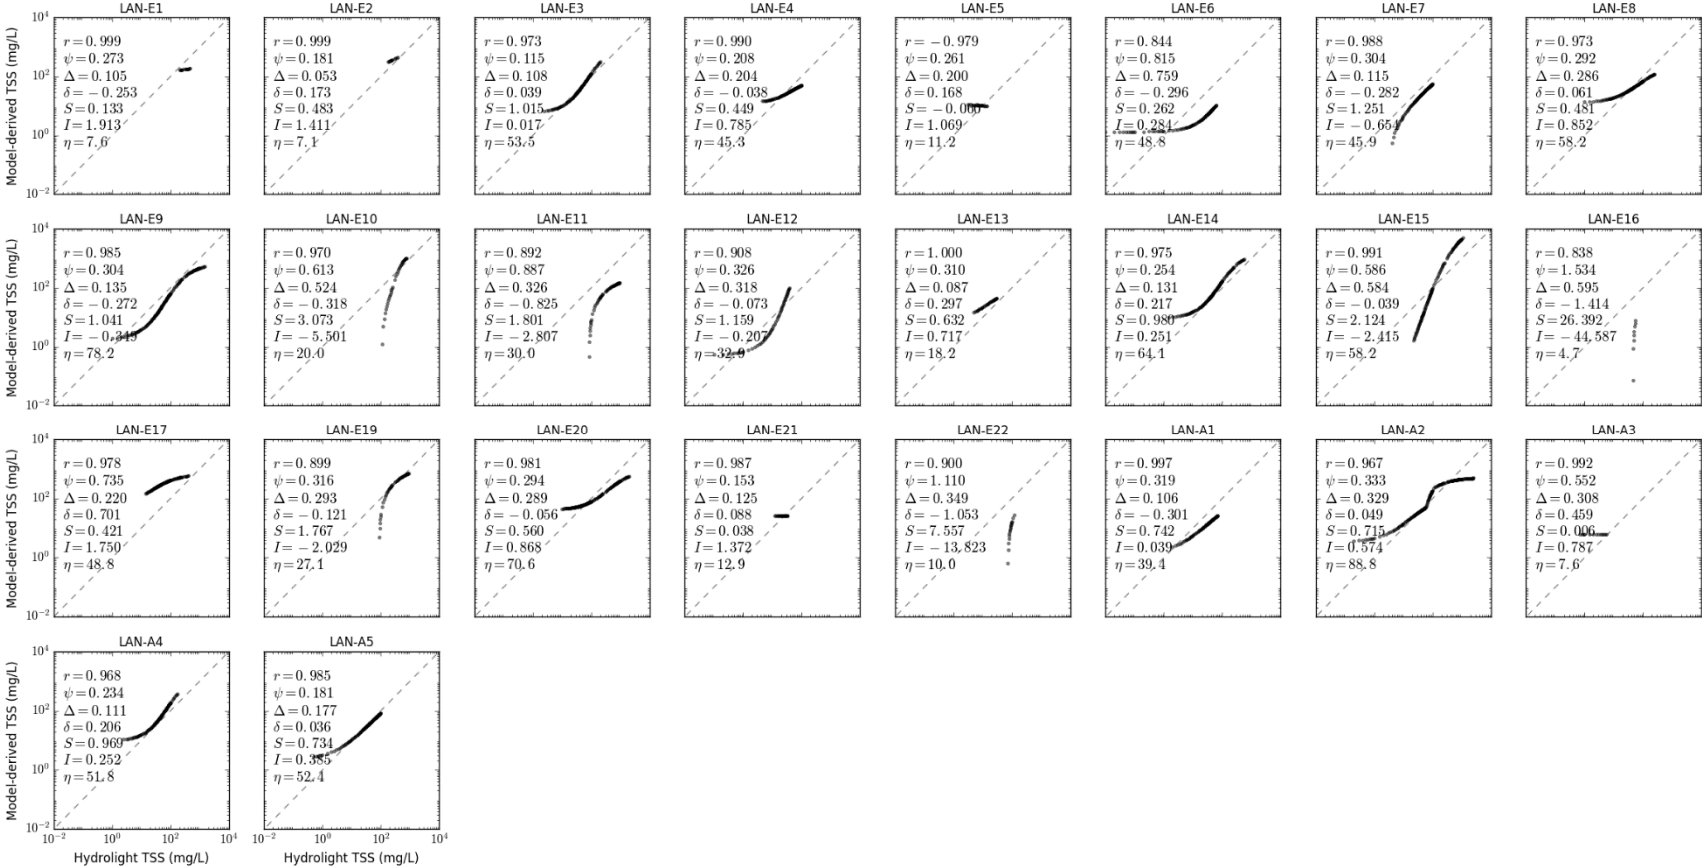

Figure S8.12. Scatter plot of LANDSAT TSS models in CLASS-III water for calcareous sand sediment,  $b_b/b$  ratio of 0.018, solar zenith angle of  $60^\circ$ .

Supplementary Materials S9. Scatter Plot of LANDSAT TSS Models for CLASS-IV Water

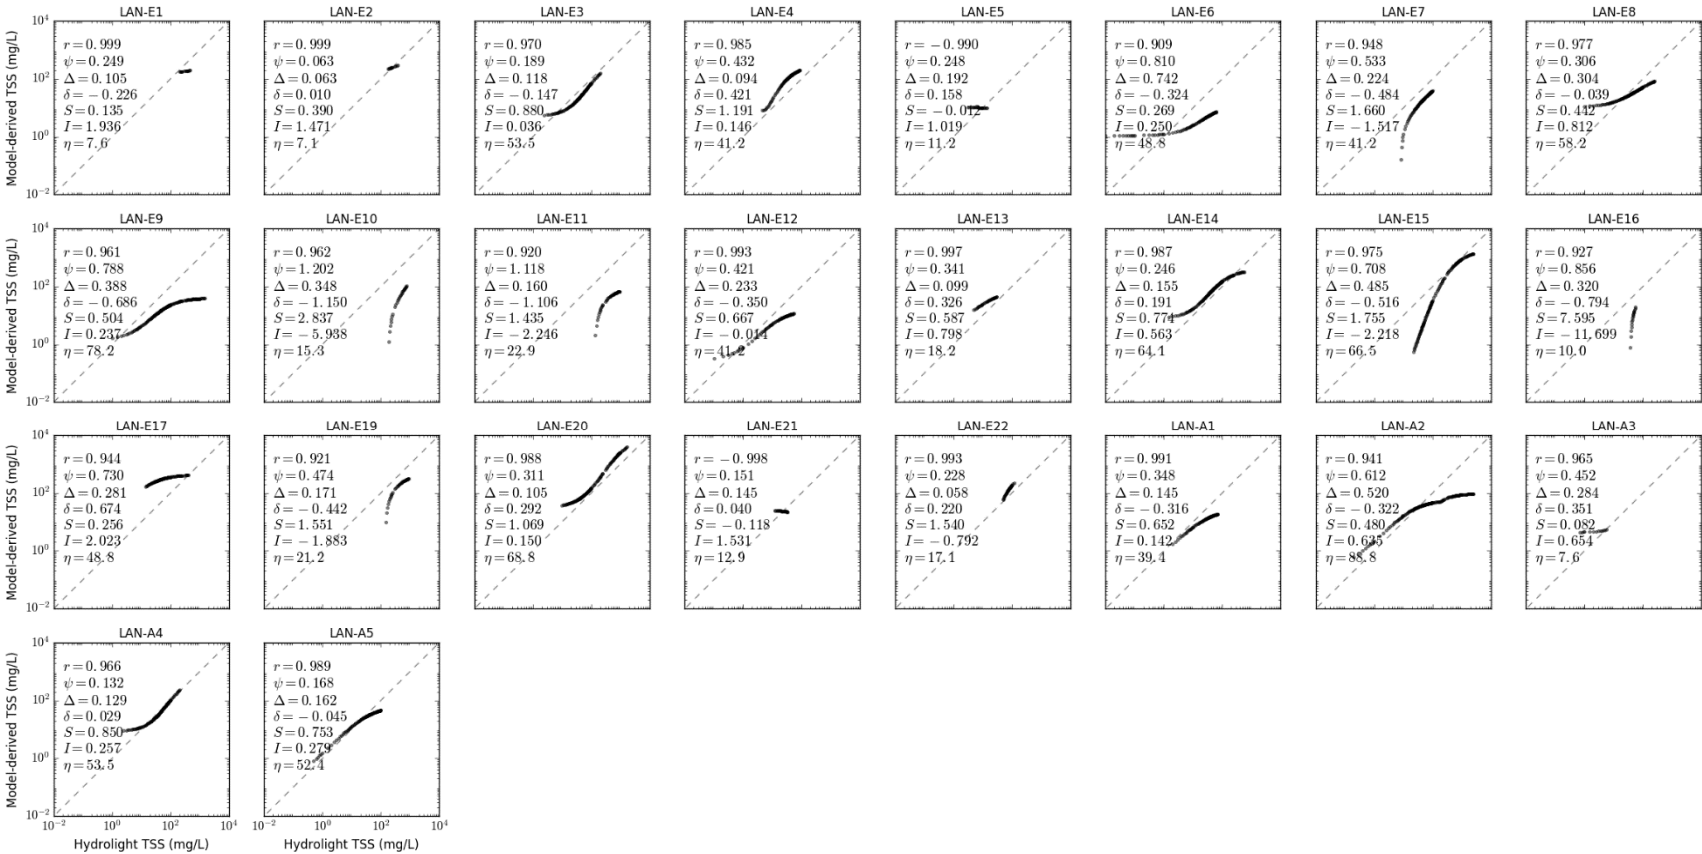

Figure S9.1. Scatter plot of LANDSAT TSS models in CLASS-IV water for brown earth sediment,  $b_b/b$  ratio of 0.018, solar zenith angle of  $30^\circ$ .

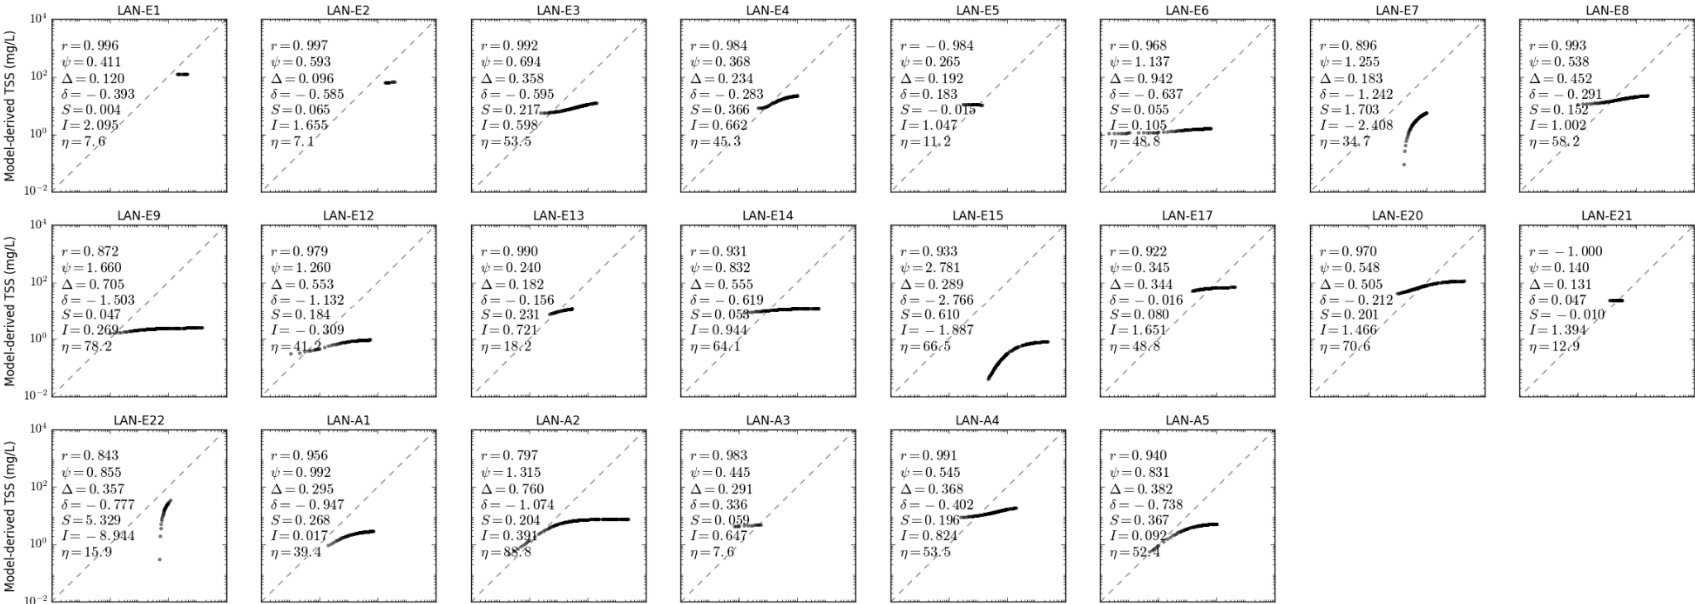

Figure S9.2. Scatter plot of LANDSAT TSS models in CLASS-IV water for bukata sediment,  $b_b/b$  ratio of 0.018, solar zenith angle of 30°.

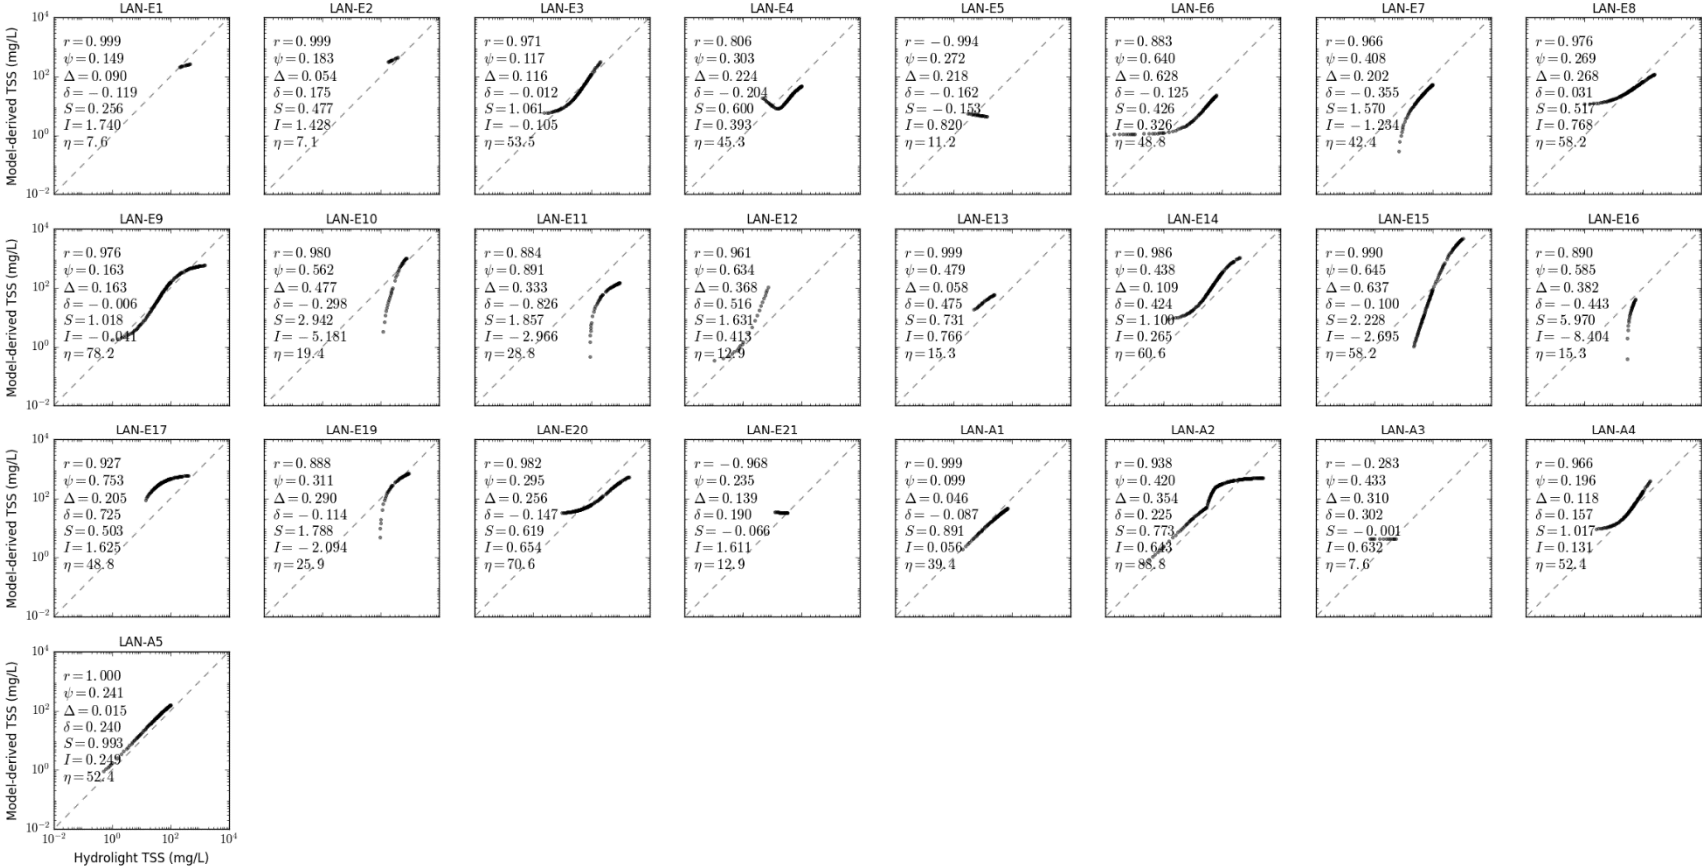

Figure S9.3. Scatter plot of LANDSAT TSS models in CLASS-IV water for calcareous sand sediment,  $b_b/b$  ratio of 0.018, solar zenith angle of 30°.

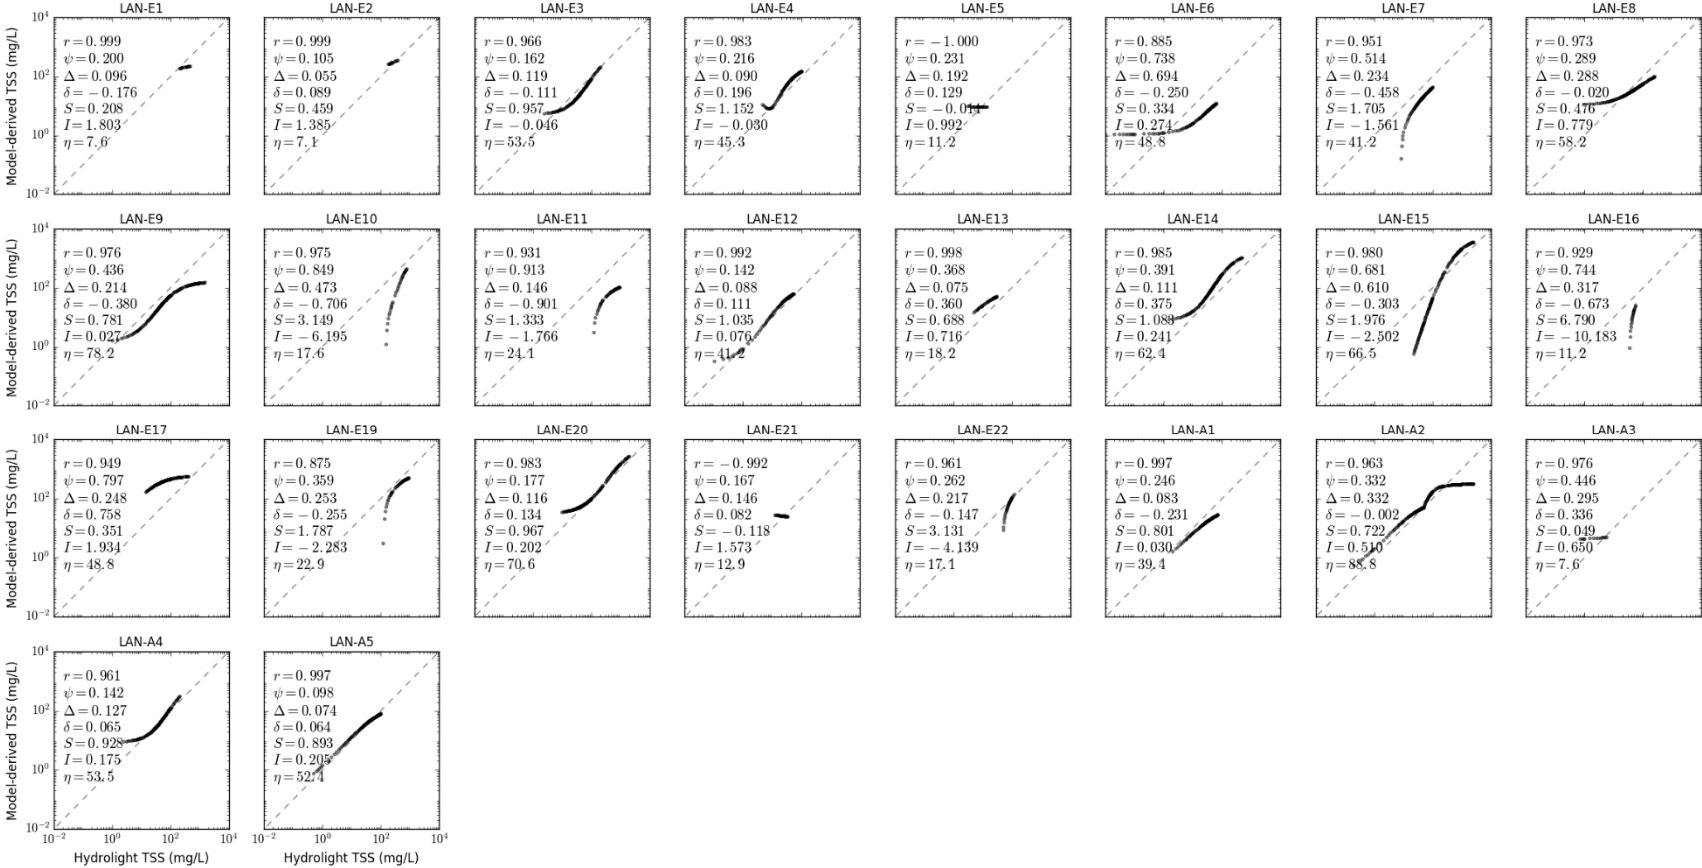

Figure S9.4. Scatter plot of LANDSAT TSS models in CLASS-IV water for red clay sediment,  $b_b/b$  ratio of 0.018, solar zenith angle of 30°.



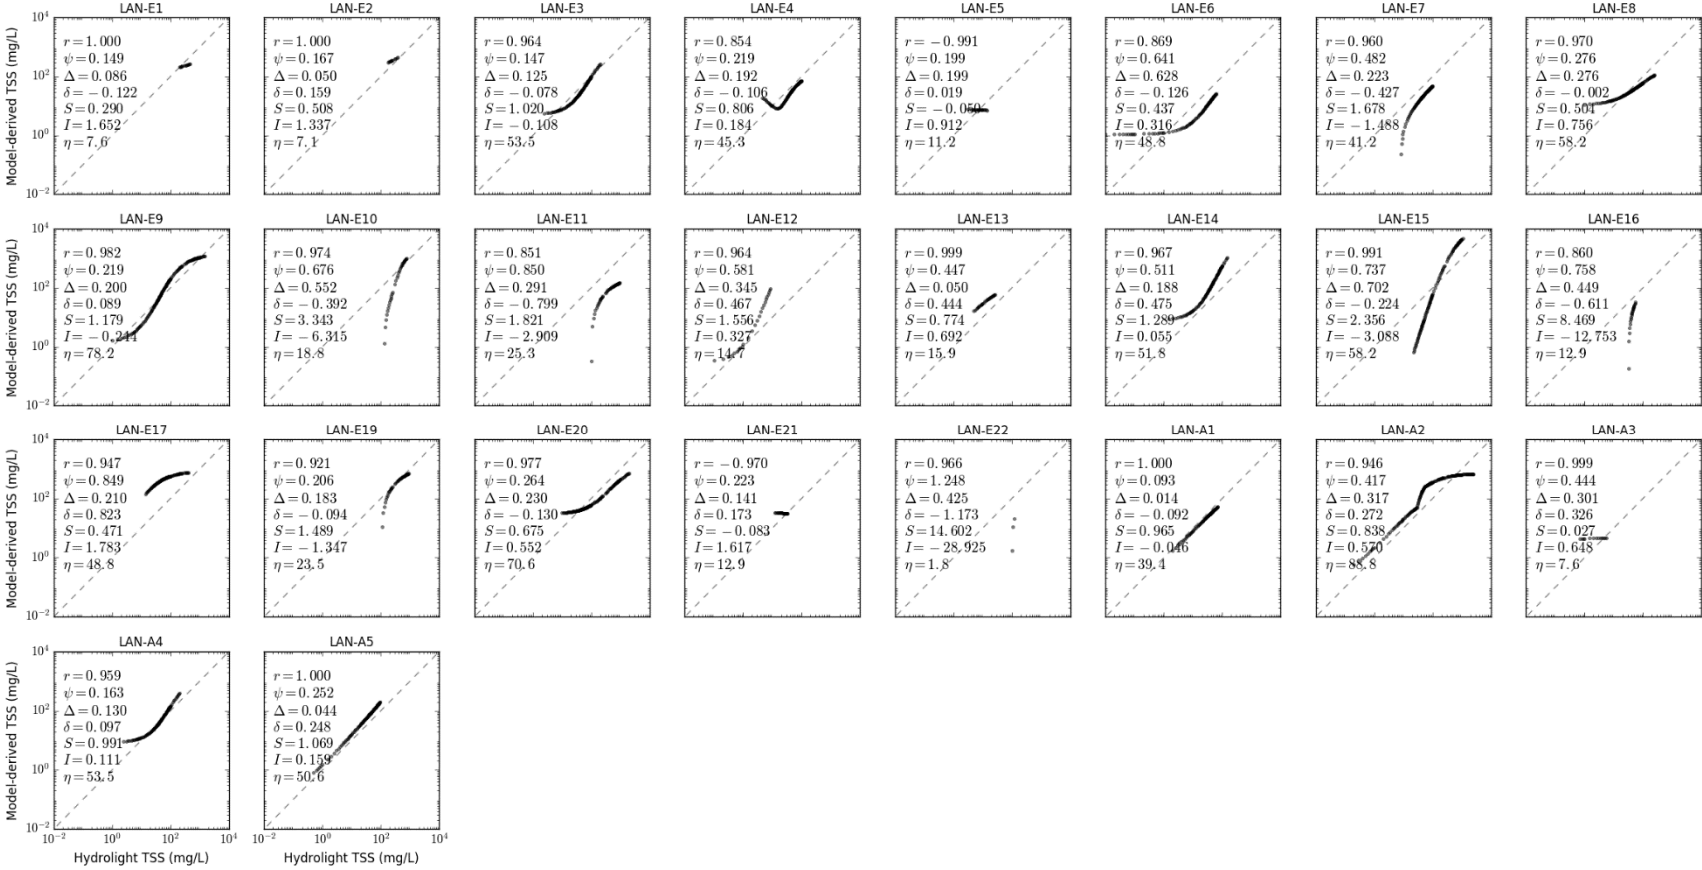

Figure S9.5. Scatter plot of LANDSAT TSS models in CLASS-IV water for yellow clay sediment,  $b_b/b$  ratio of 0.018, solar zenith angle of 30°.

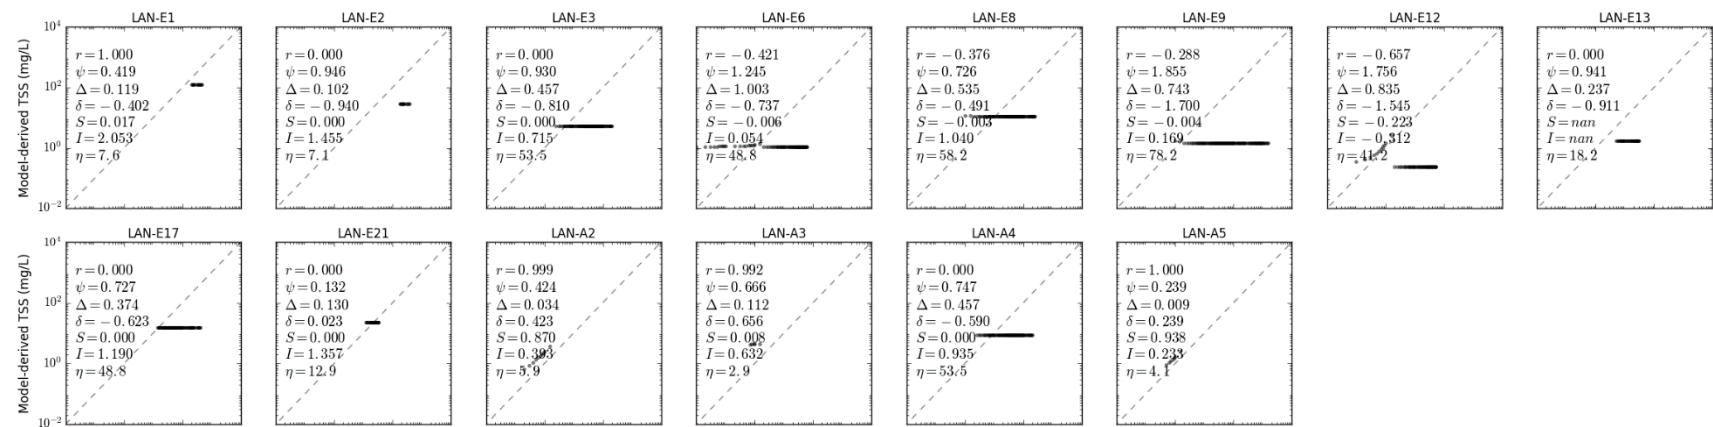

Figure S9.6. Scatter plot of LANDSAT TSS models in CLASS-IV water for calcareous sand sediment,  $b_b/b$  ratio of 0.001, solar zenith angle of 30°.

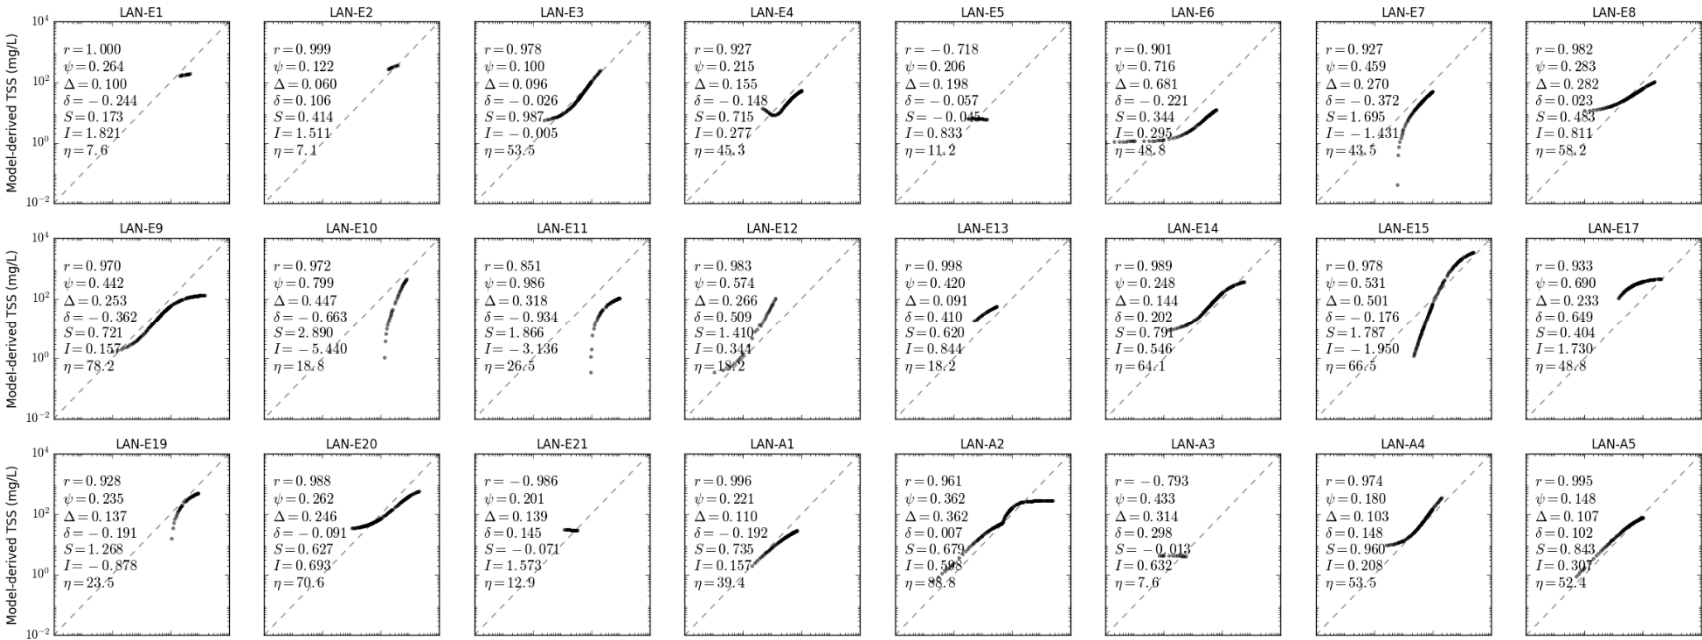

**Figure S9.7.** Scatter plot of LANDSAT TSS models in CLASS-IV water for calcareous sand sediment,  $b_b/b$  ratio of 0.01, solar zenith angle of 30°.

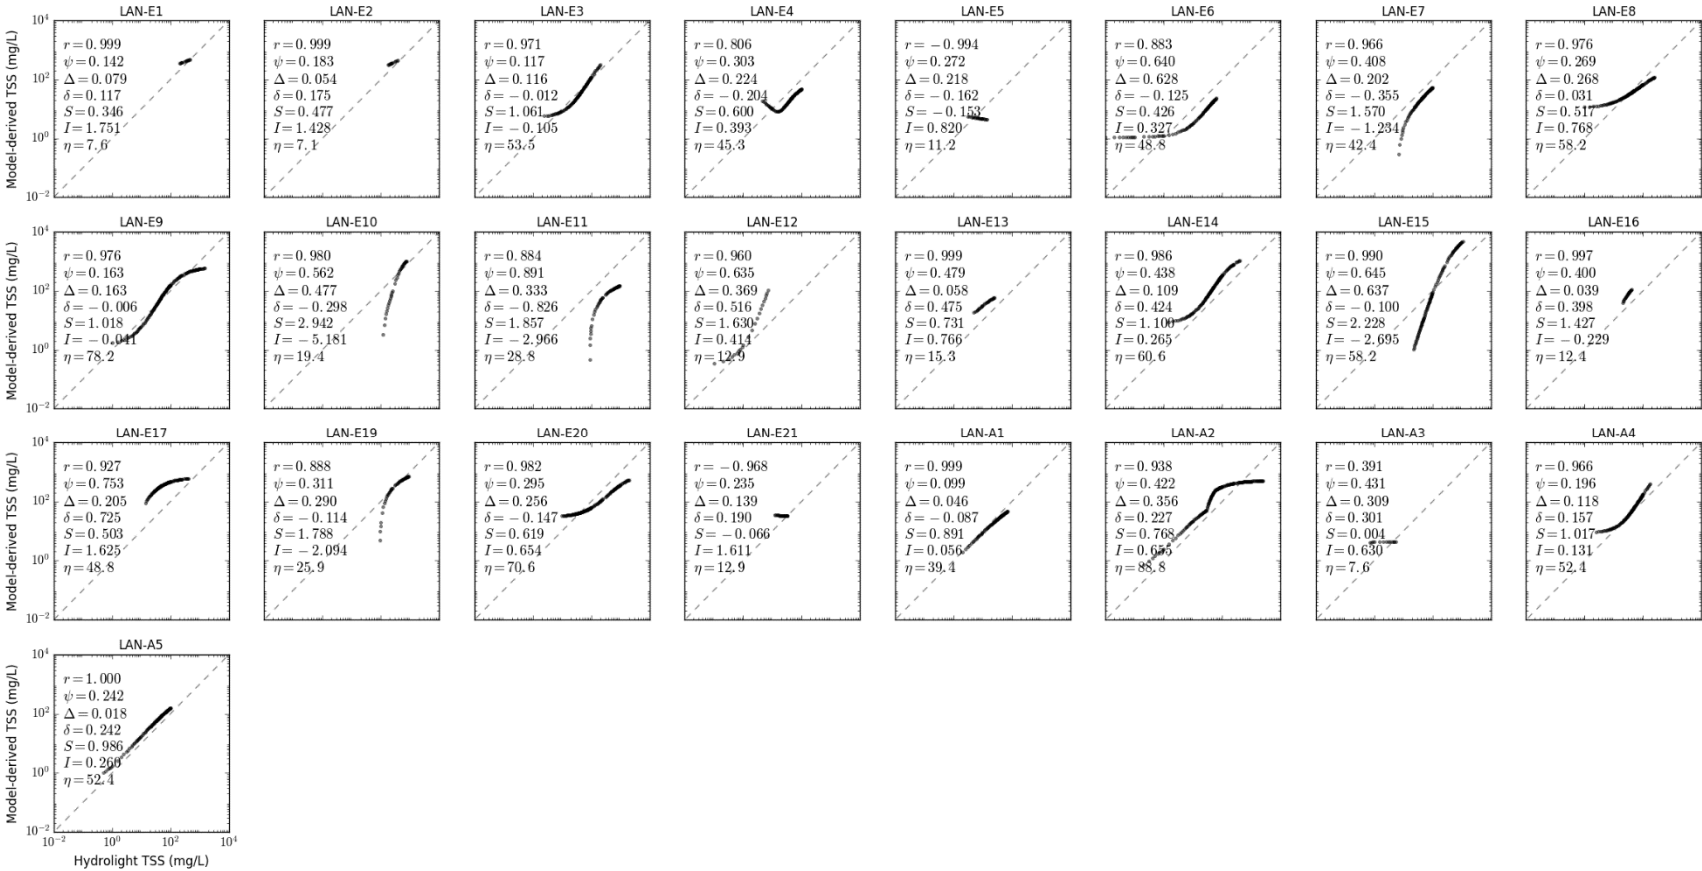

Figure S9.8. Scatter plot of LANDSAT TSS models in CLASS-IV water for calcareous sand sediment,  $b_b/b$  ratio of 0.05, solar zenith angle of 30°.

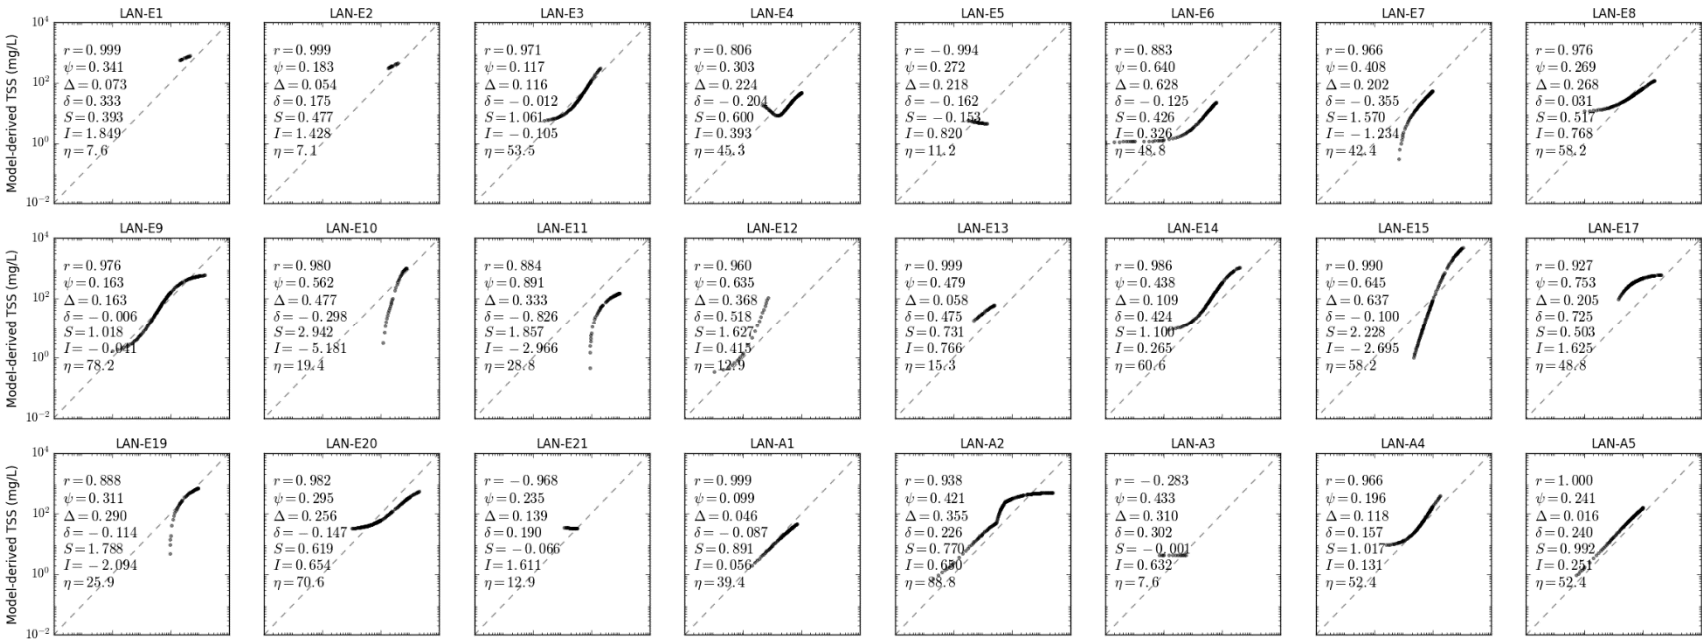

Figure S9.9. Scatter plot of LANDSAT TSS models in CLASS-IV water for calcareous sand sediment,  $b_b/b$  ratio of 0.1, solar zenith angle of 30°.

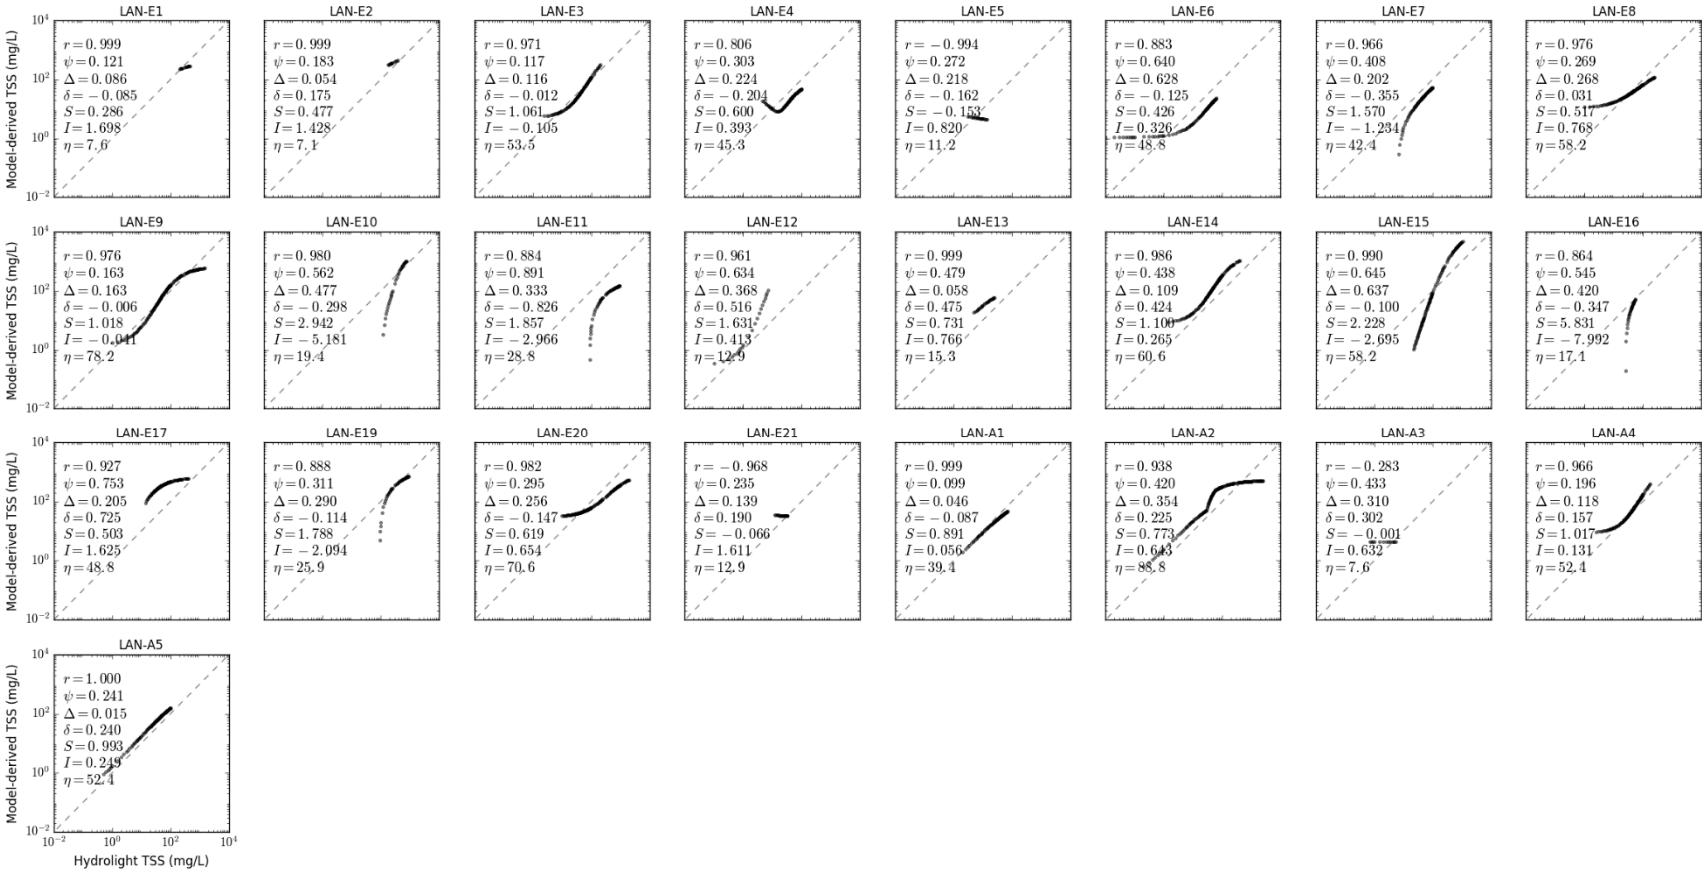

Figure S9.10. Scatter plot of LANDSAT TSS models in CLASS-IV water for calcareous sand sediment,  $b_b/b$  ratio of 0.018, solar zenith angle of 15°.

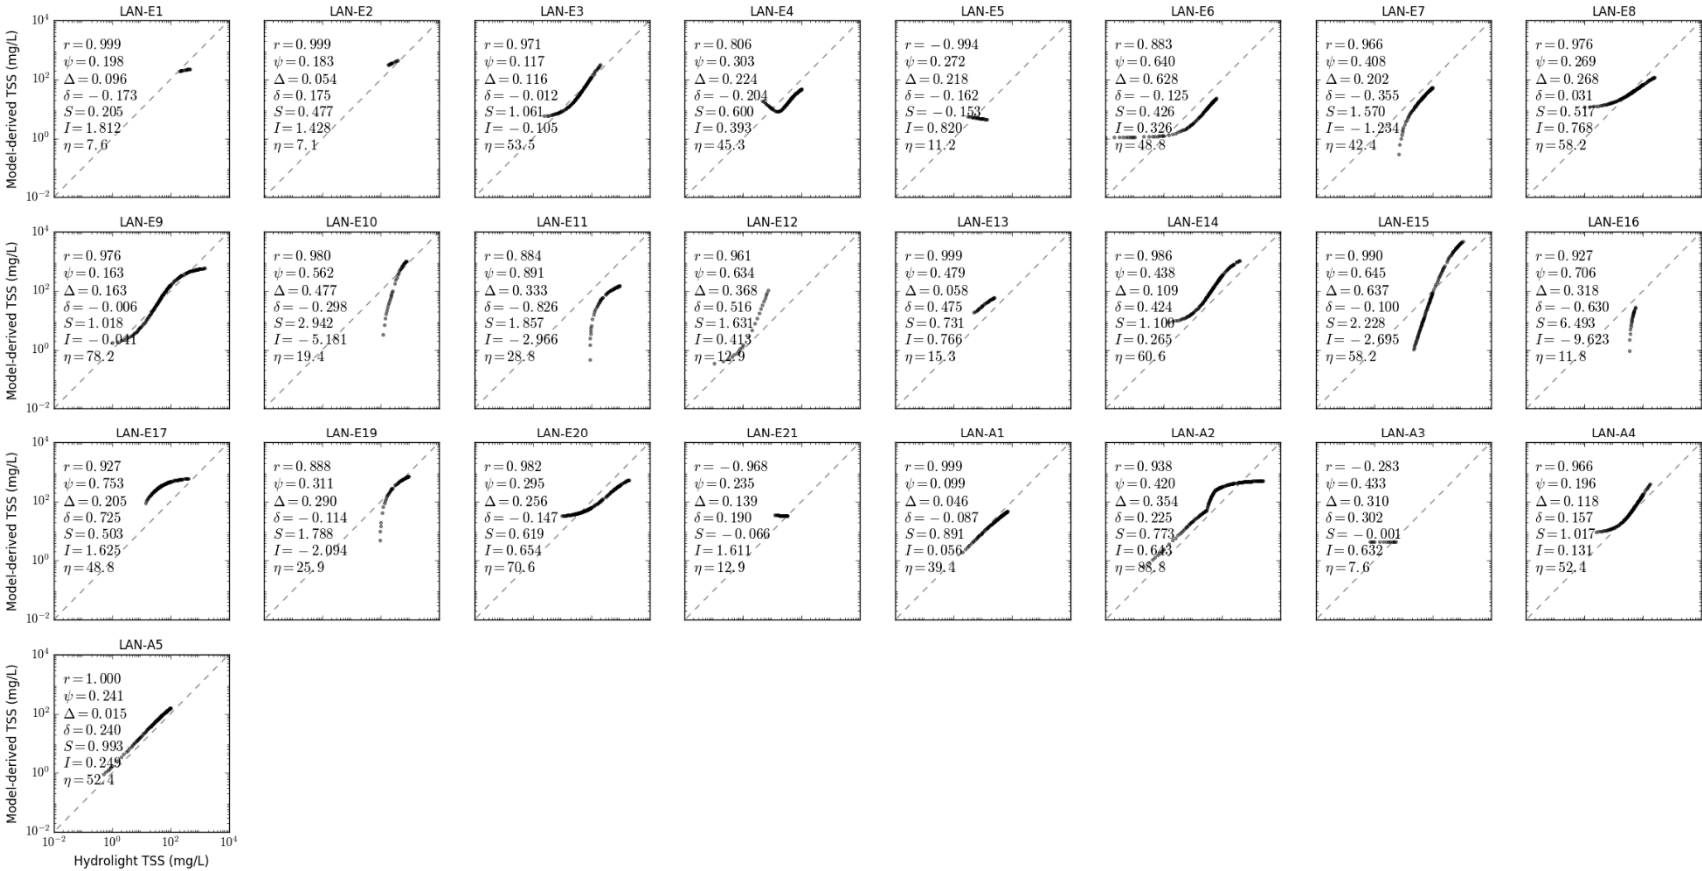

Figure S9.11. Scatter plot of LANDSAT TSS models in CLASS-IV water for calcareous sand sediment,  $b_b/b$  ratio of 0.018, solar zenith angle of  $45^\circ$ .

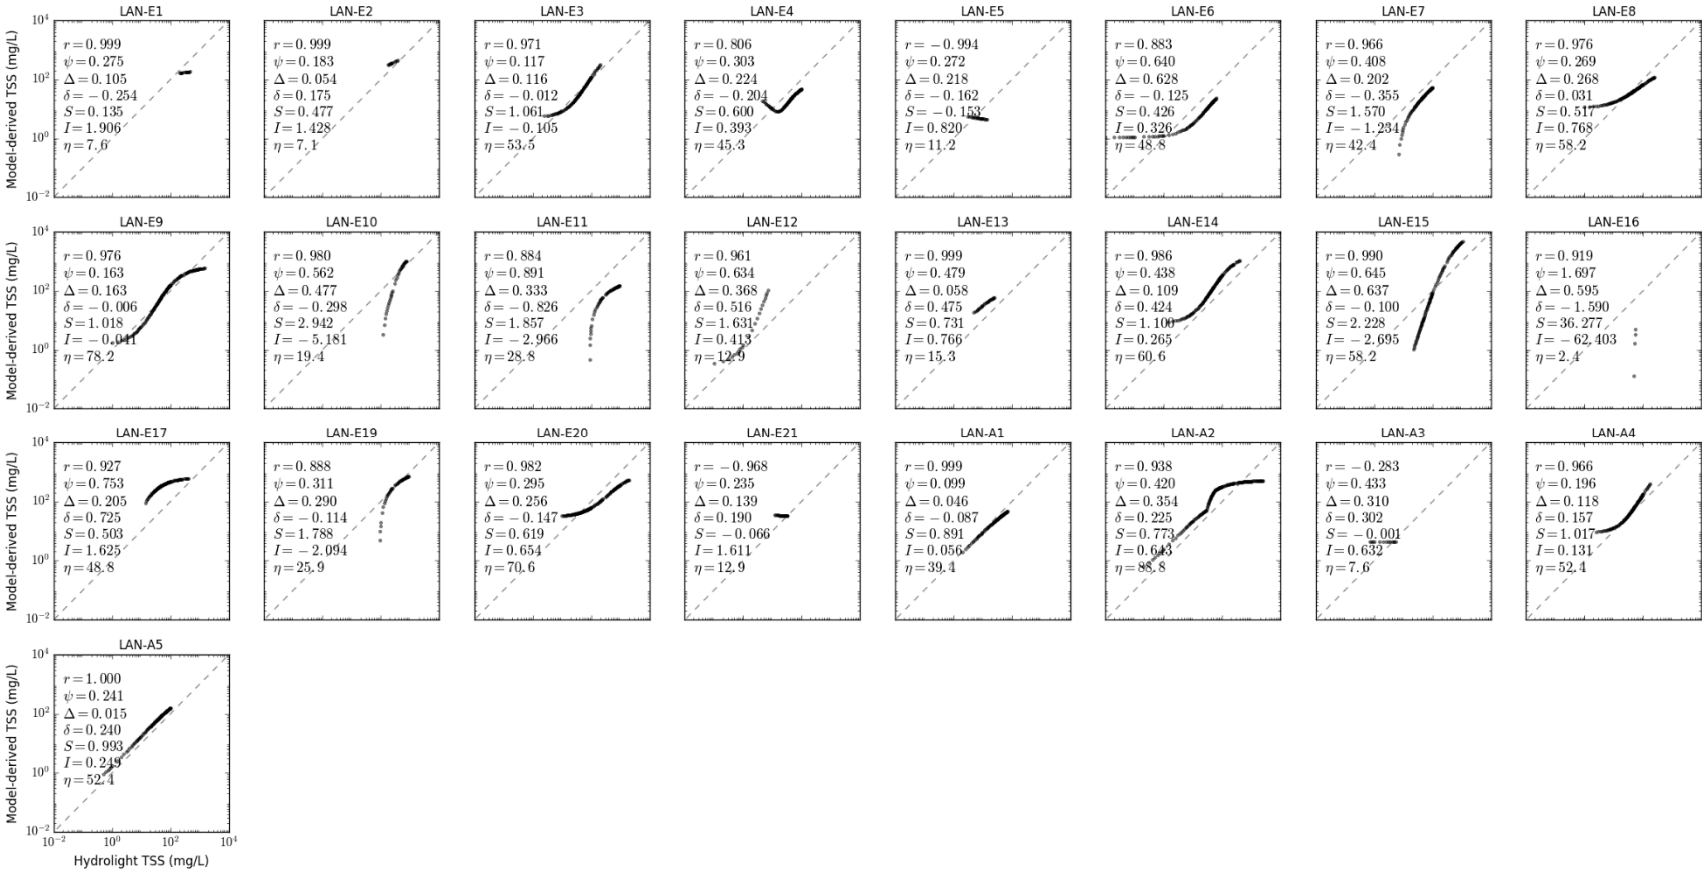

Figure S9.12. Scatter plot of LANDSAT TSS models in CLASS-IV water for calcareous sand sediment,  $b_b/b$  ratio of 0.018, solar zenith angle of  $60^\circ$ .



Supplementary Materials S10. Scatter Plot of LANDSAT TSS Models for CLASS-V Water

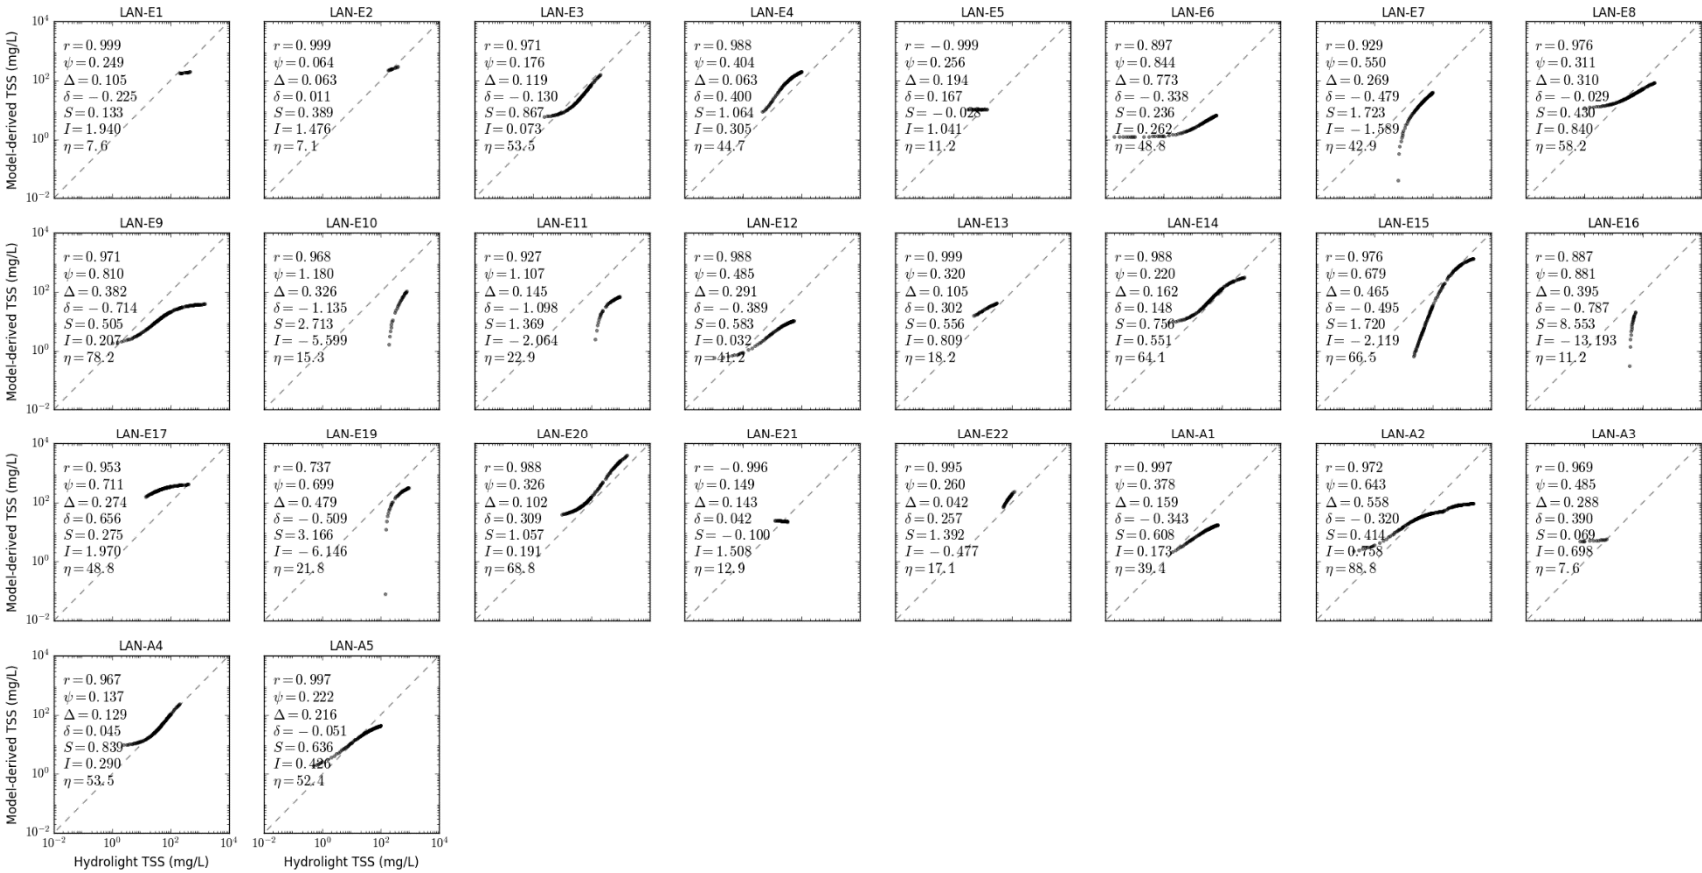

Figure S10.1. Scatter plot of LANDSAT TSS models in CLASS-V water for brown earth sediment,  $b_b/b$  ratio of 0.018, solar zenith angle of 30°.

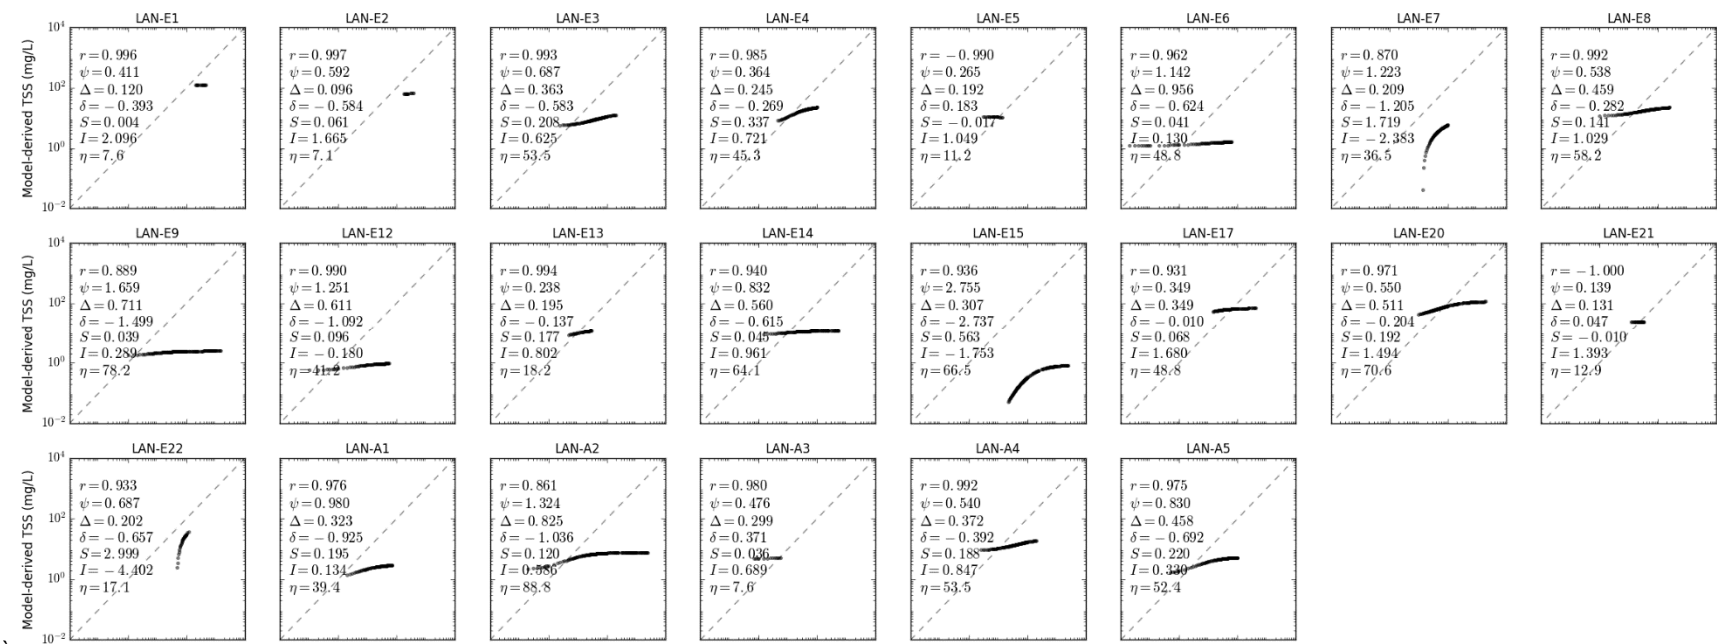

Figure S10.2. Scatter plot of LANDSAT TSS models in CLASS-V water for bukata sediment,  $b_b/b$  ratio of 0.018, solar zenith angle of  $30^\circ$ .

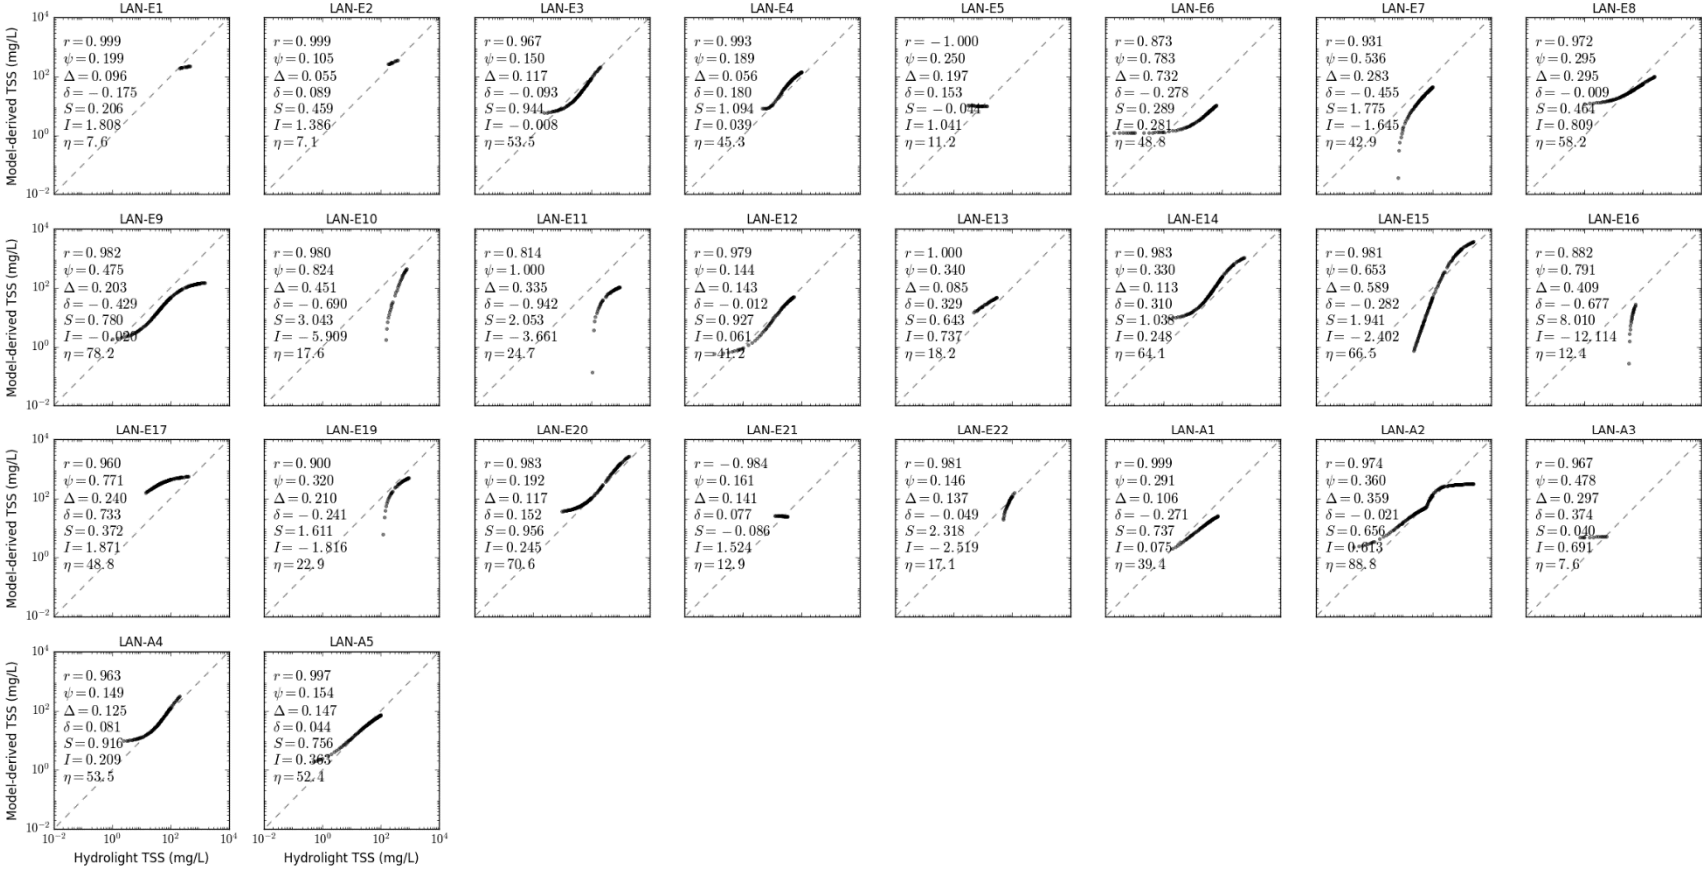

Figure S10.3. Scatter plot of LANDSAT TSS models in CLASS-V water for calcareous sand sediment,  $b_b/b$  ratio of 0.018, solar zenith angle of 30°.

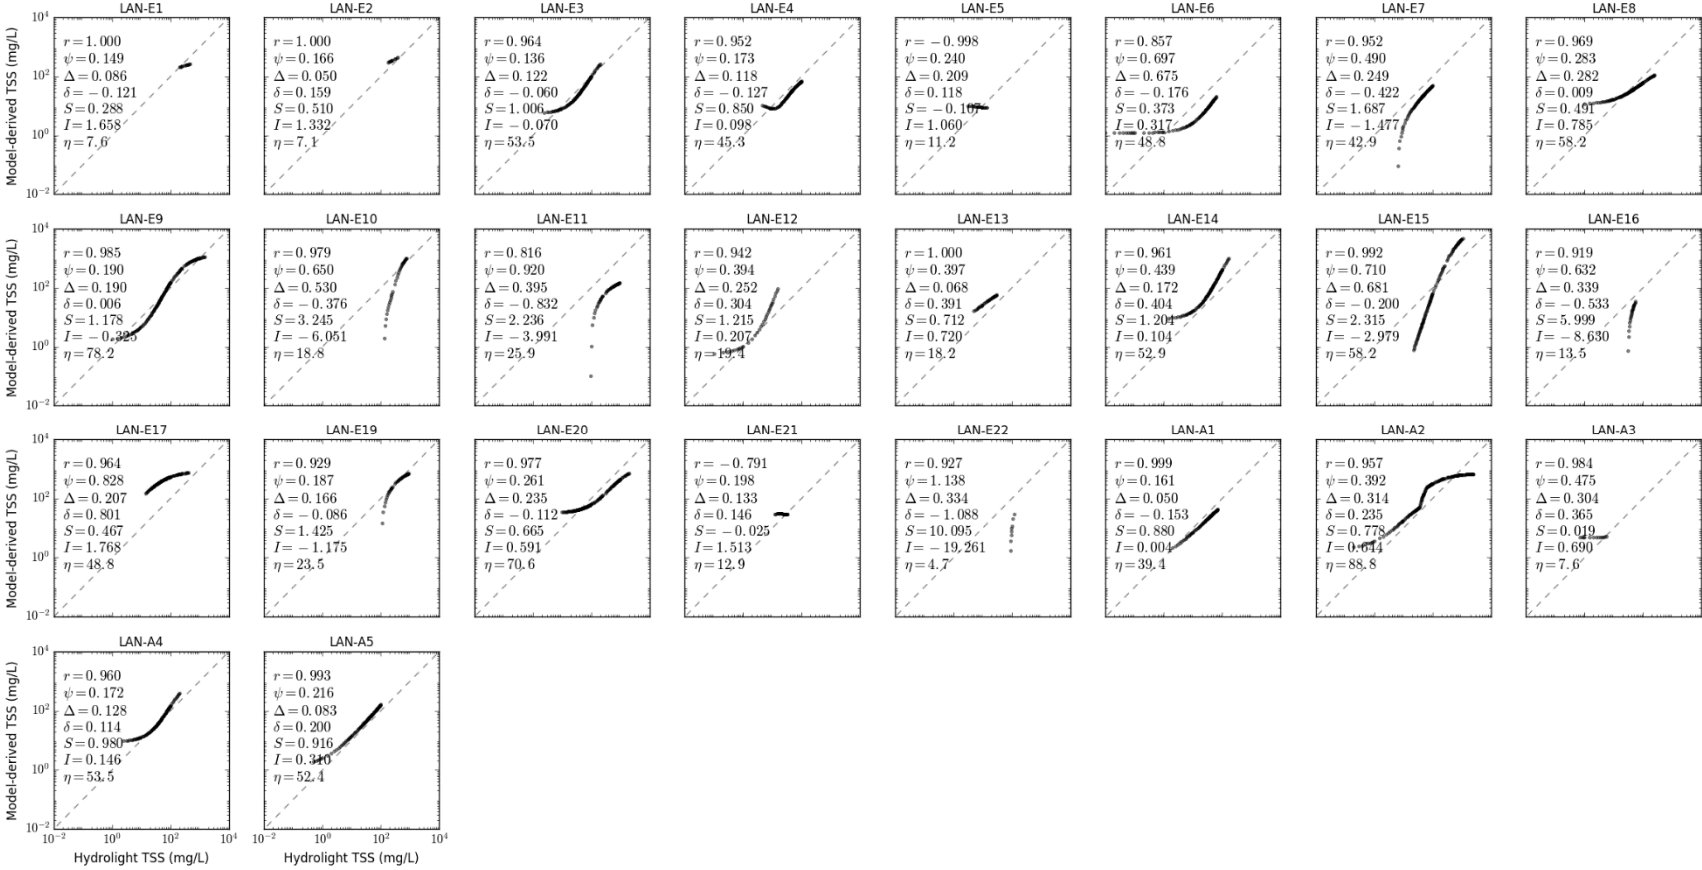

Figure S10.4. Scatter plot of LANDSAT TSS models in CLASS-V water for red clay sediment,  $b_b/b$  ratio of 0.018, solar zenith angle of 30°.

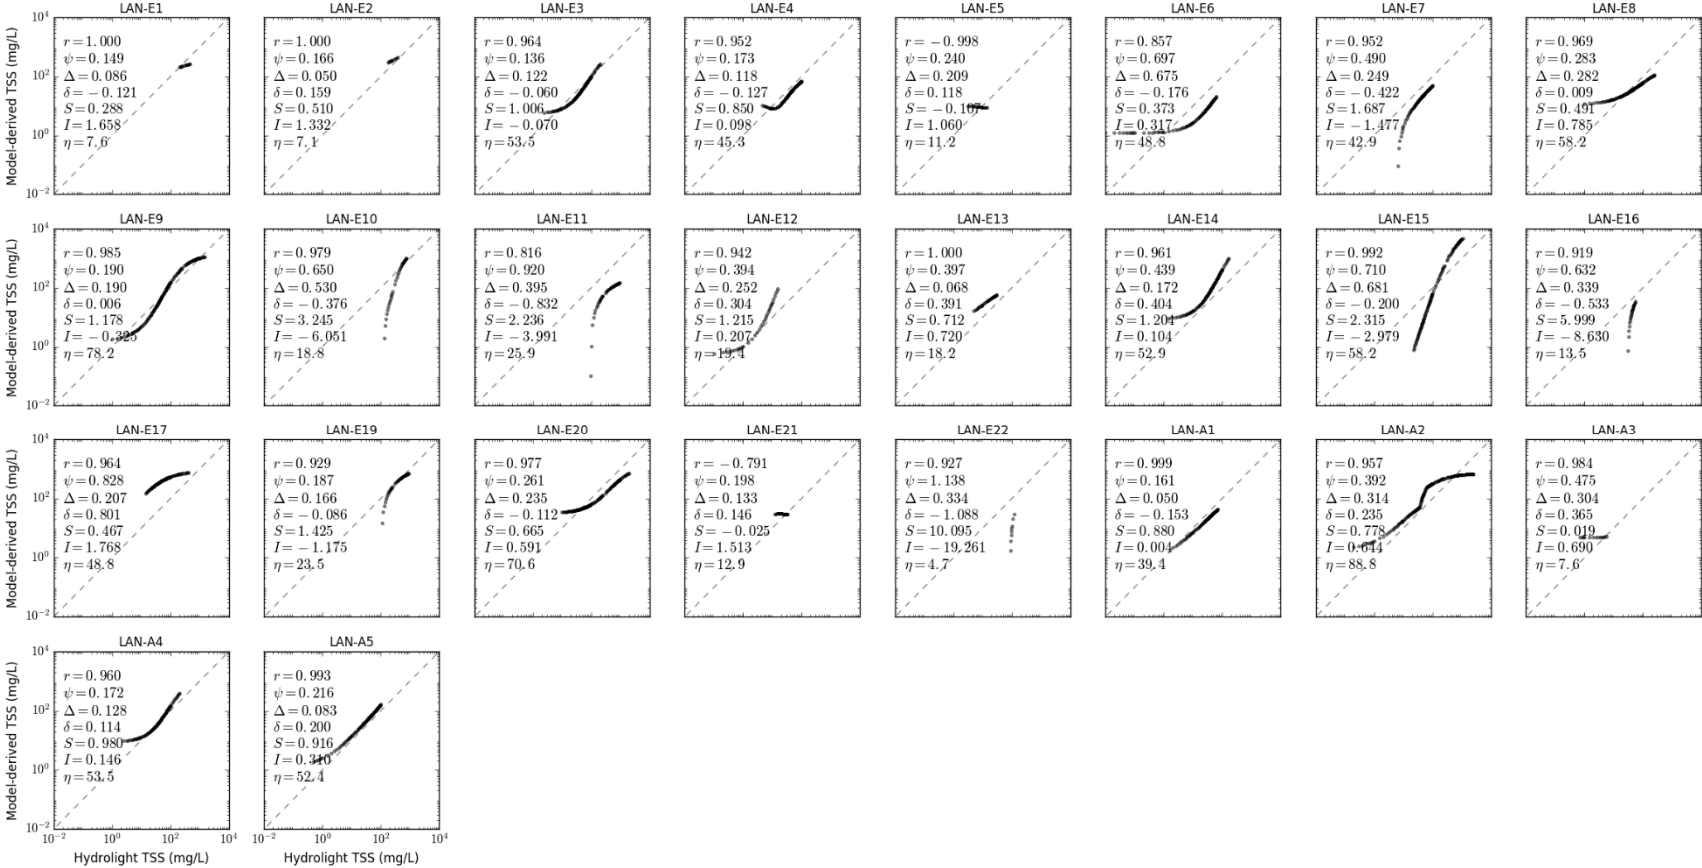

Figure S10.5. Scatter plot of LANDSAT TSS models in CLASS-V water for yellow clay sediment,  $b_b/b$  ratio of 0.018, solar zenith angle of  $30^\circ$ .

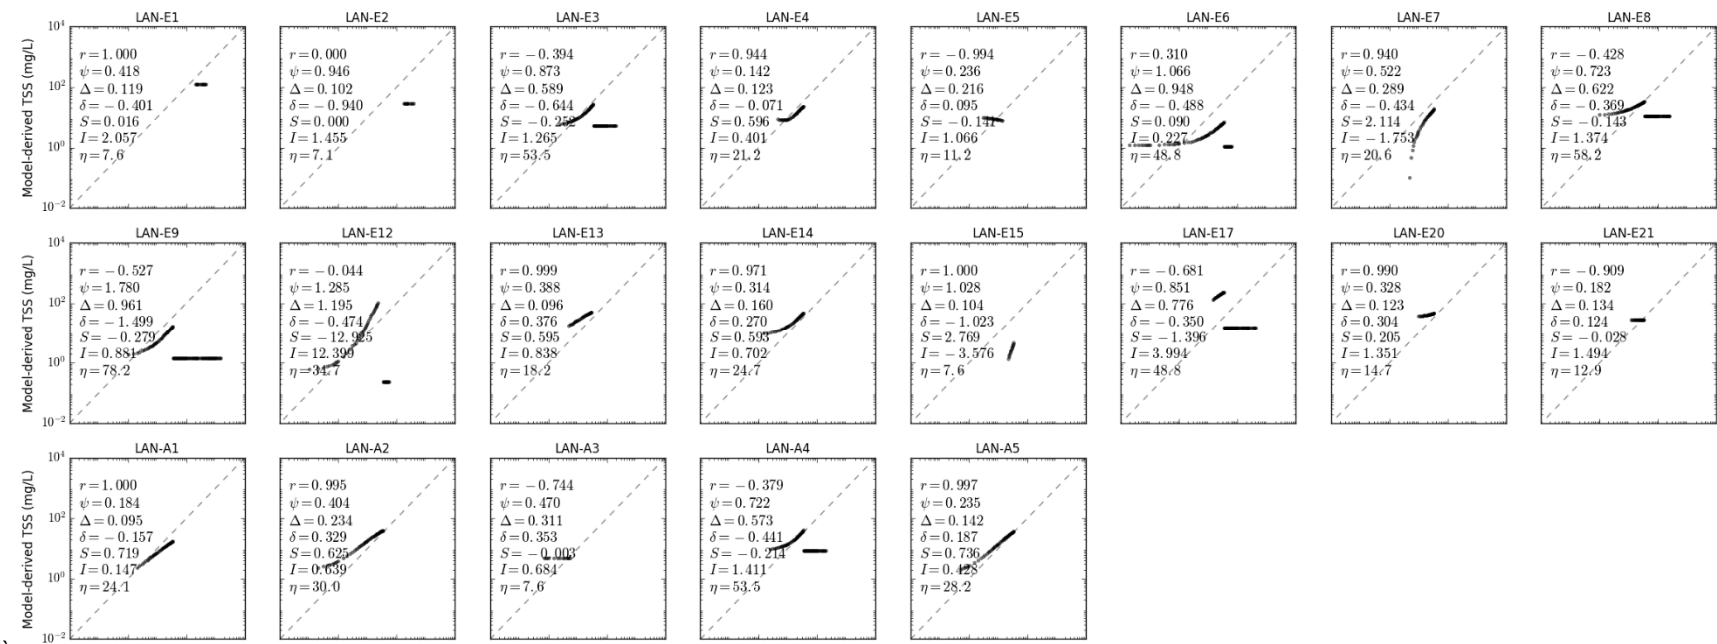

Figure S10.6. Scatter plot of LANDSAT TSS models in CLASS-V water for calcareous sand sediment,  $b_b/b$  ratio of 0.001, solar zenith angle of 30°.

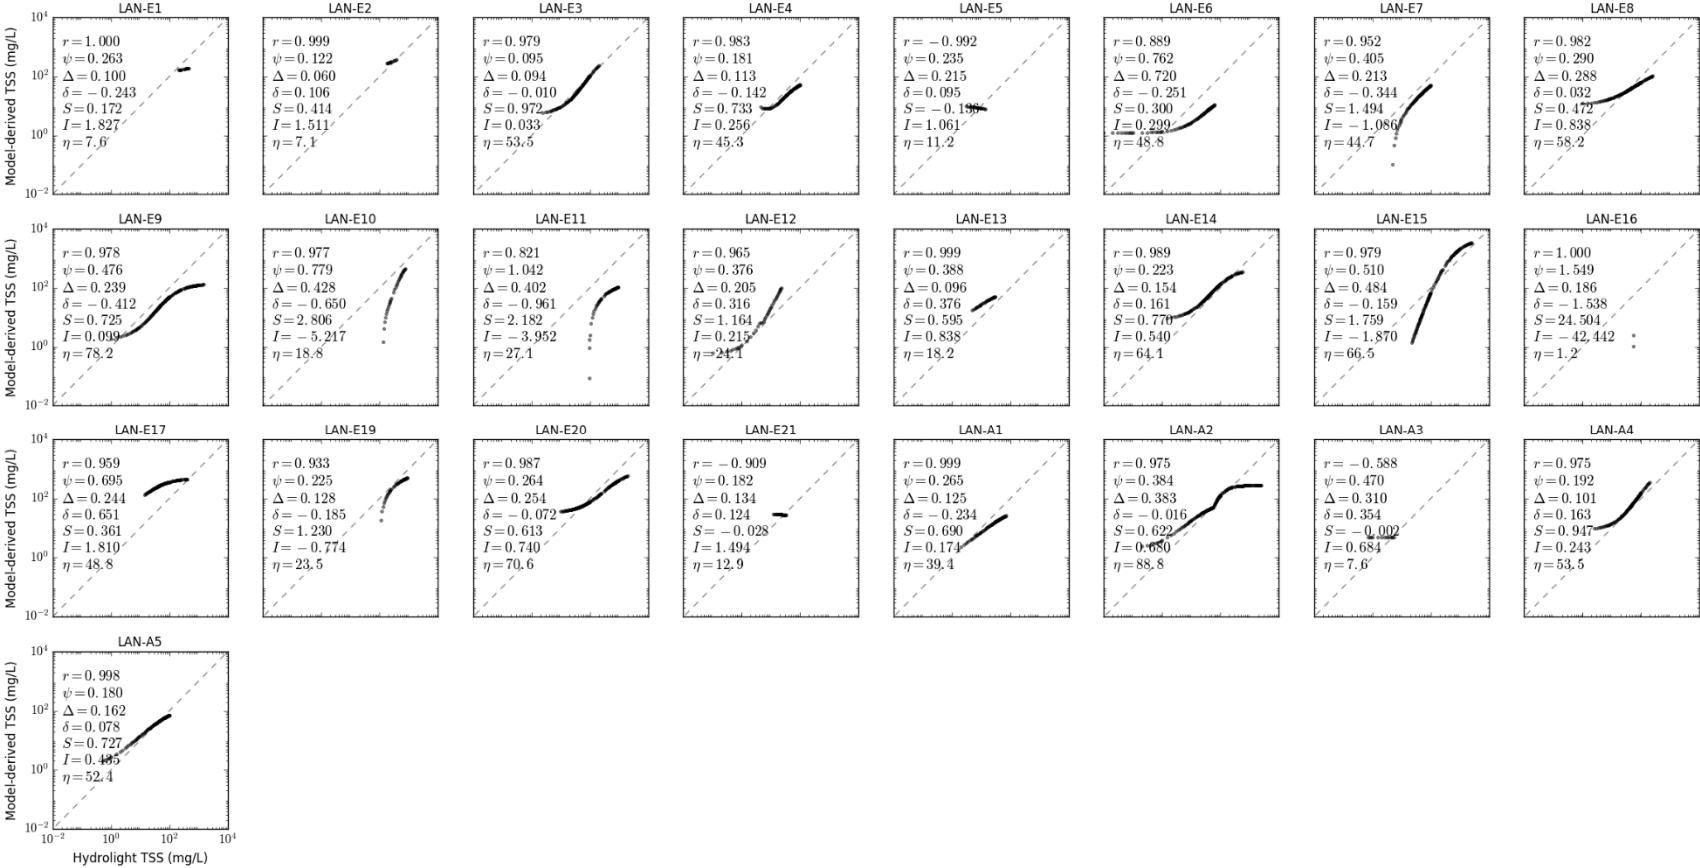

Figure S10.7. Scatter plot of LANDSAT TSS models in CLASS-V water for calcareous sand sediment,  $b_b/b$  ratio of 0.01, solar zenith angle of 30°.

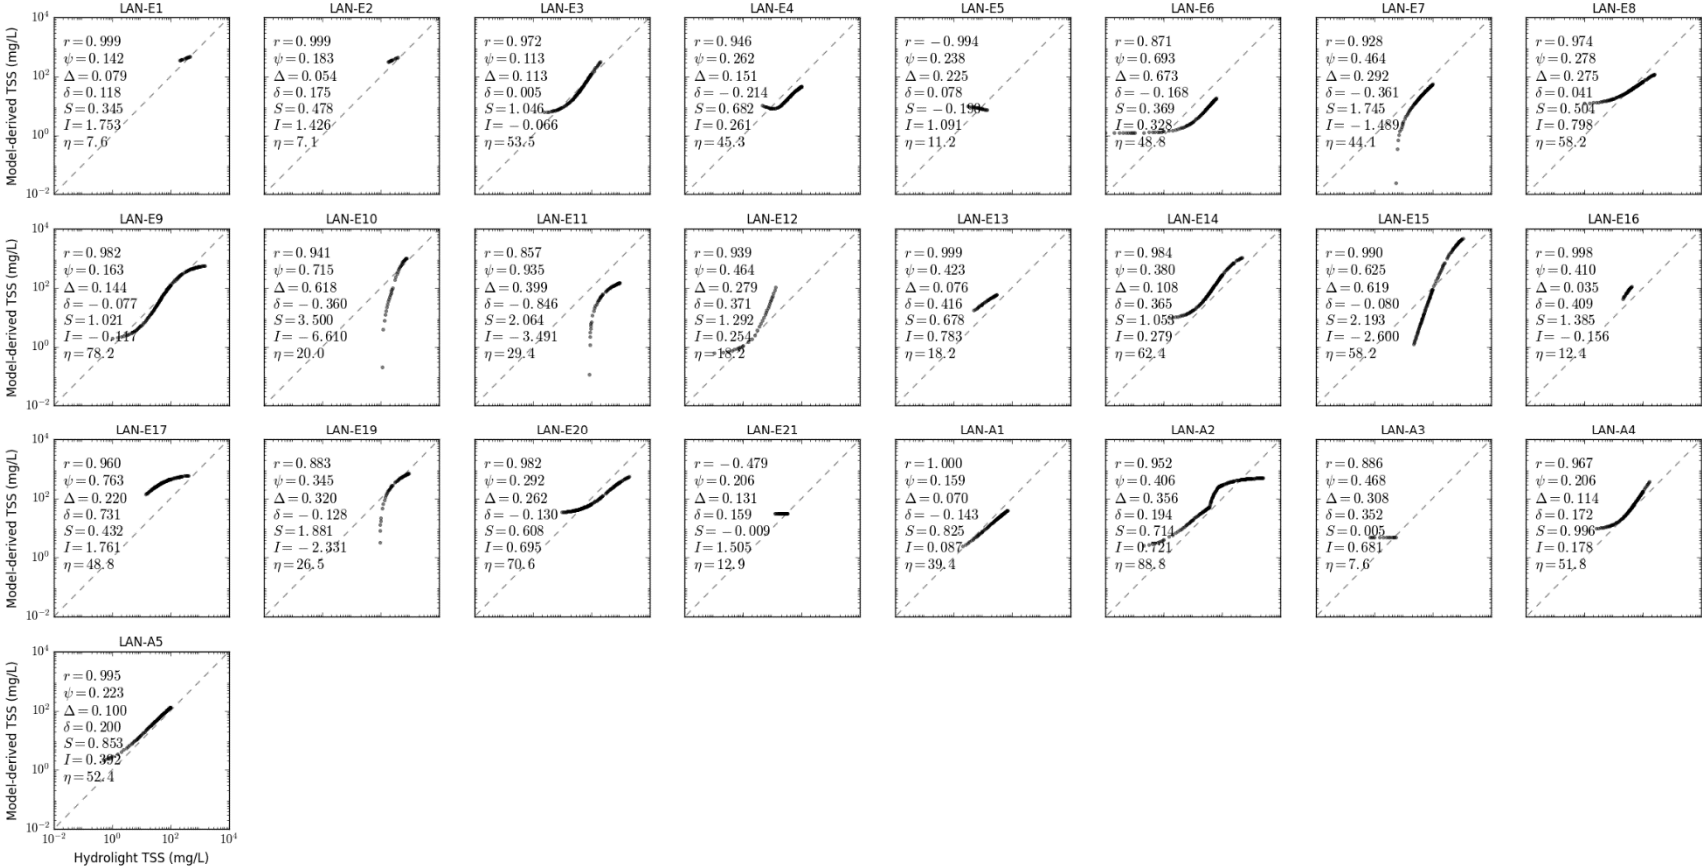

Figure S10.8. Scatter plot of LANDSAT TSS models in CLASS-V water for calcareous sand sediment,  $b_b/b$  ratio of 0.05, solar zenith angle of  $30^\circ$ .



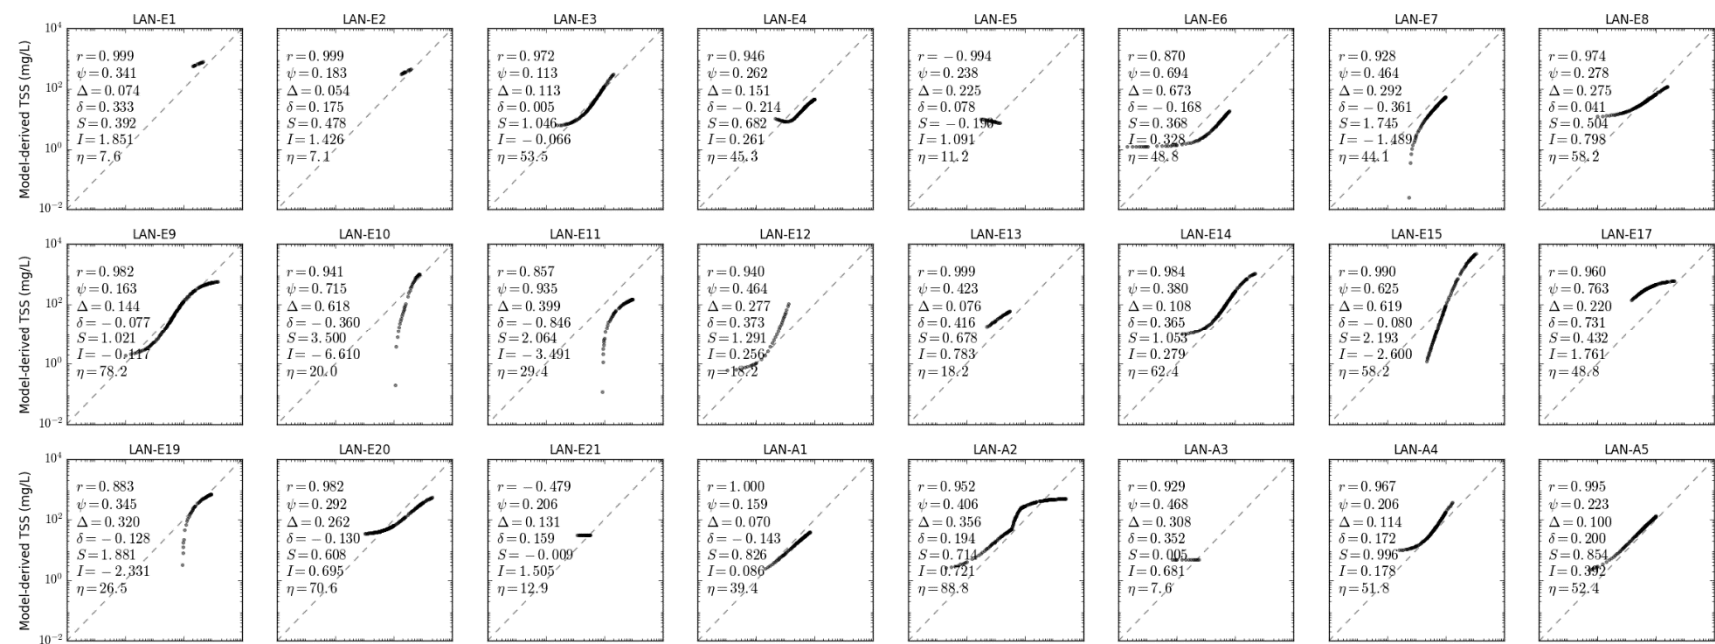

Figure S10.9. Scatter plot of LANDSAT TSS models in CLASS-V water for calcareous sand sediment,  $b_b/b$  ratio of 0.1, solar zenith angle of  $30^\circ$ .

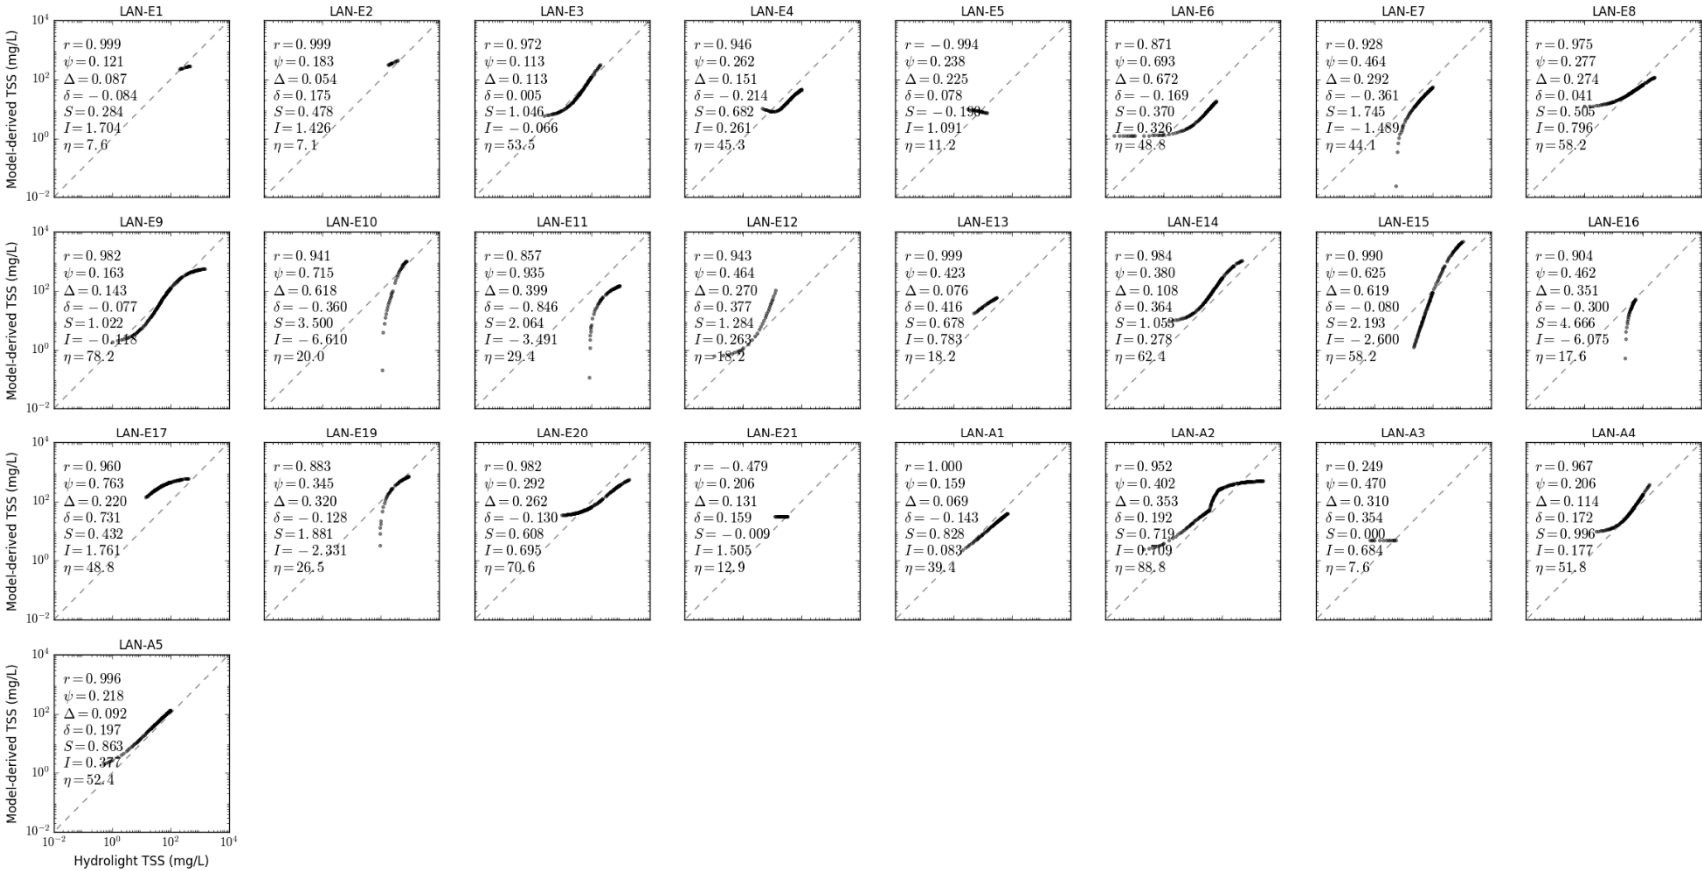

Figure S10.10. Scatter plot of LANDSAT TSS models in CLASS-V water for calcareous sand sediment,  $b_b/b$  ratio of 0.018, solar zenith angle of 15°.

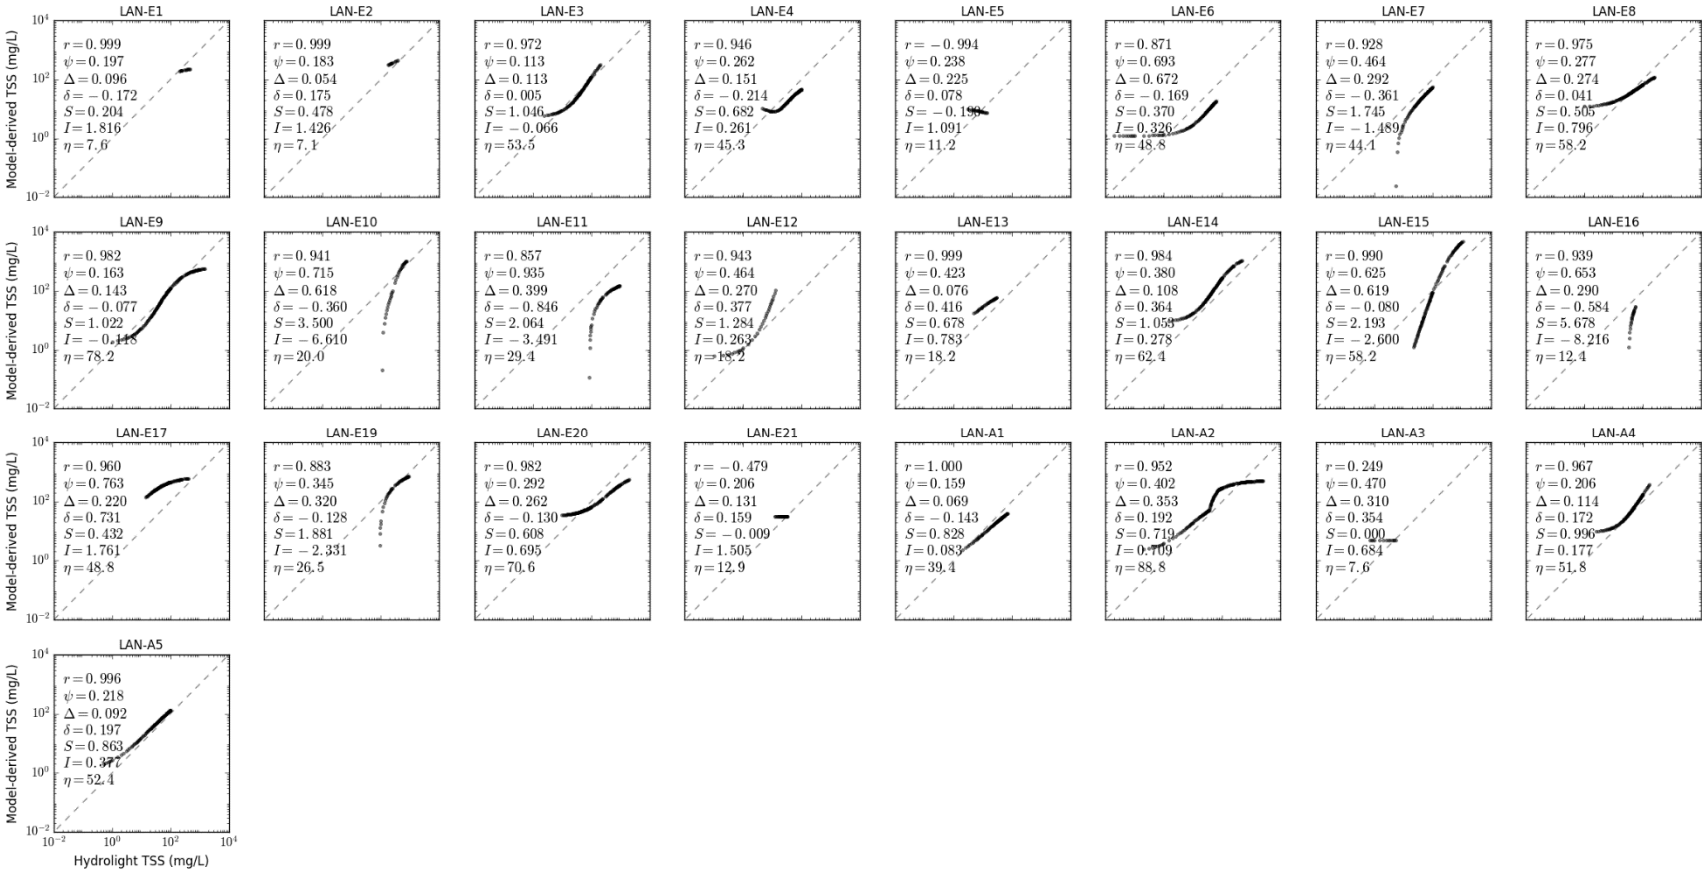

Figure S10.11. Scatter plot of LANDSAT TSS models in CLASS-V water for calcareous sand sediment,  $b_b/b$  ratio of 0.018, solar zenith angle of 45°.

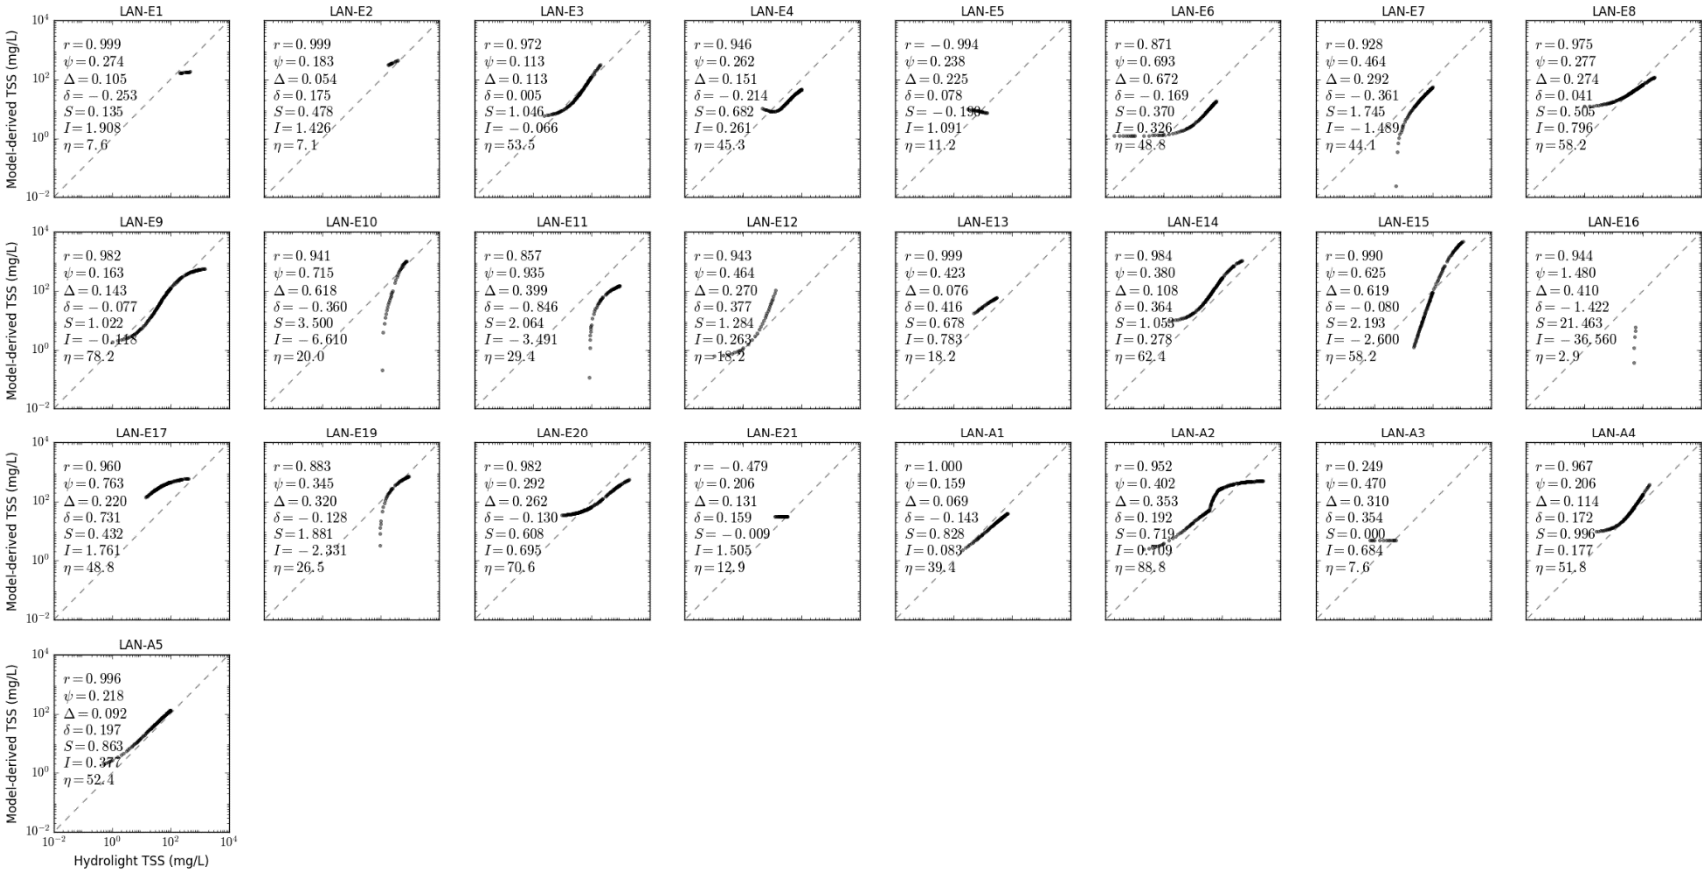

Figure S10.12. Scatter plot of LANDSAT TSS models in CLASS-V water for calcareous sand sediment,  $b_b/b$  ratio of 0.018, solar zenith angle of 60°.

**S11:** This supplementary section shows the scoring of each of the MODIS (MOD) and LANDSAT (LAN) TSS models for the individual water types, sediment types, backscattering ratios and solar zenith angles.

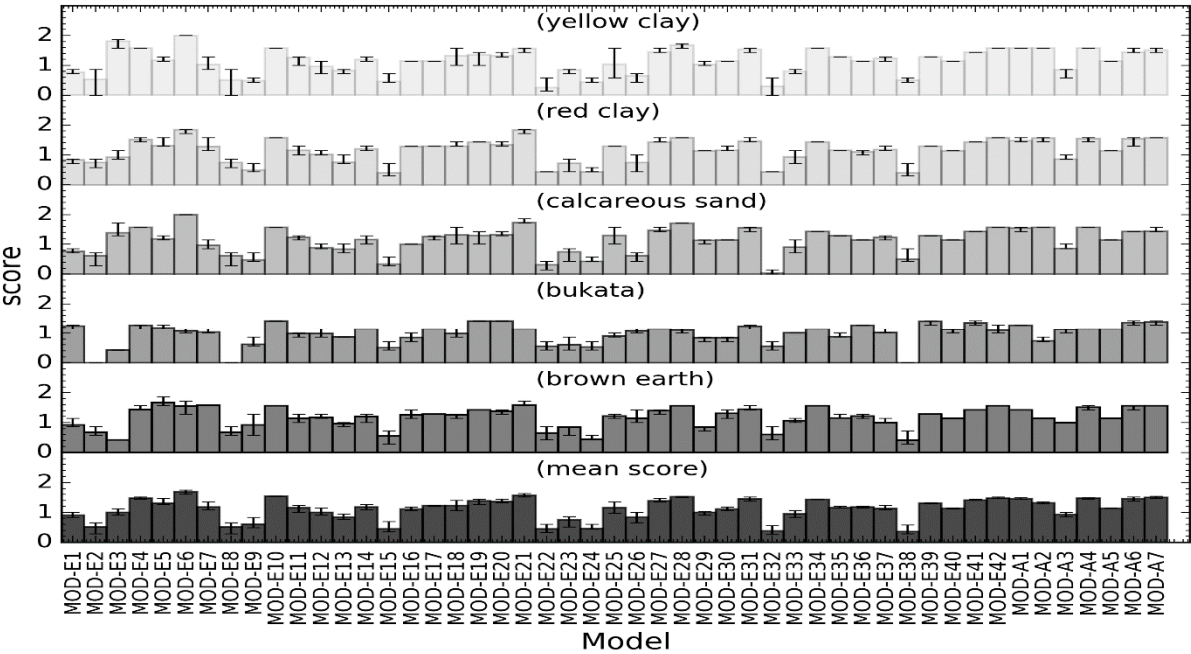

**Figure S11.1.** Total scores for different sediments and the average scores across all five sediments in CLASS-I water.

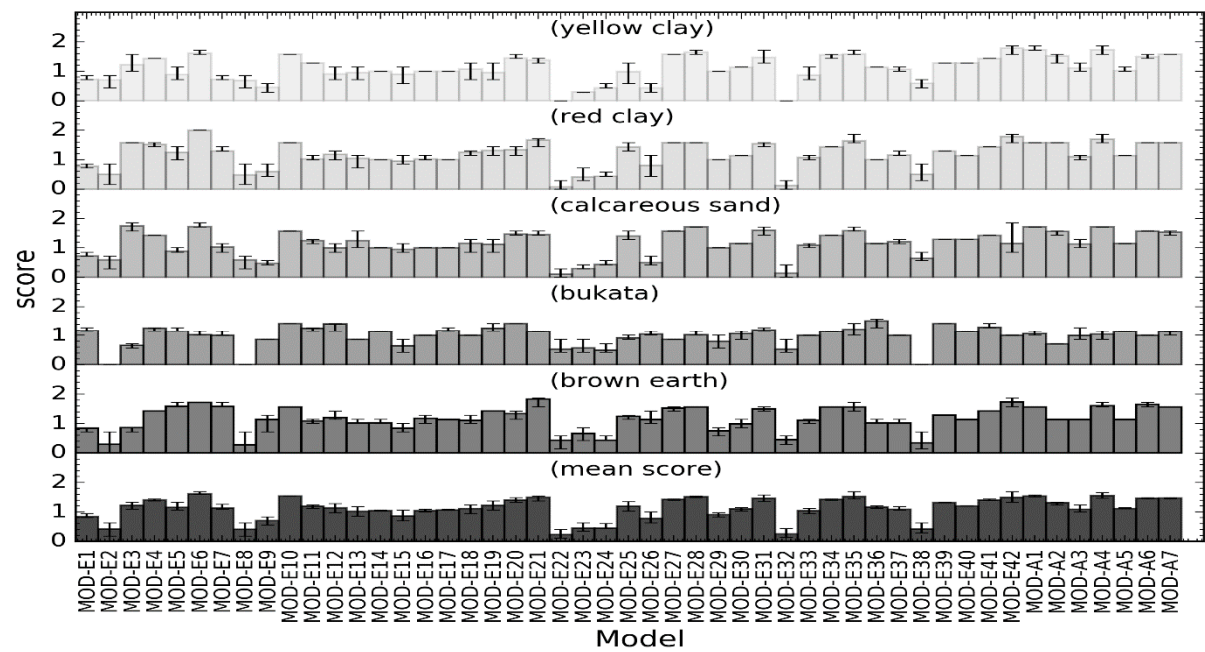

**Figure S11.2.** Total scores for different sediments and the average scores across all five sediments in CLASS-II water.

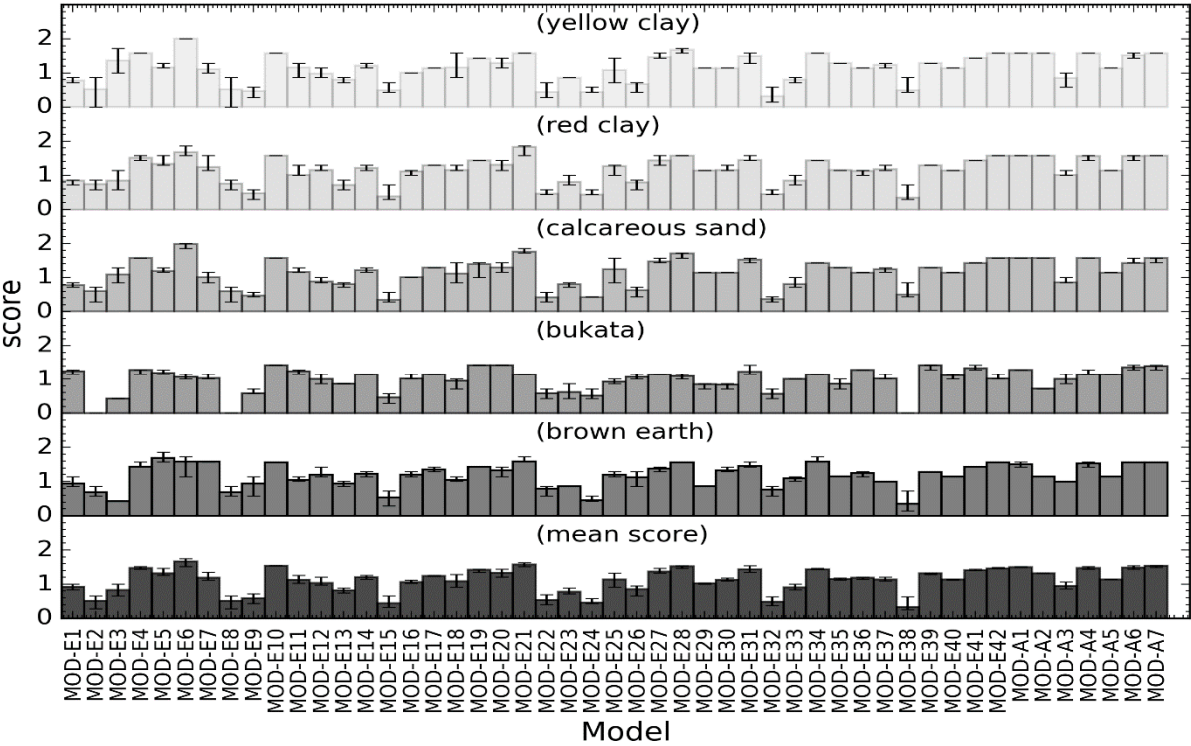

**Figure S11.3.** Total scores for different sediments and the average scores across all five sediments in CLASS-III water.

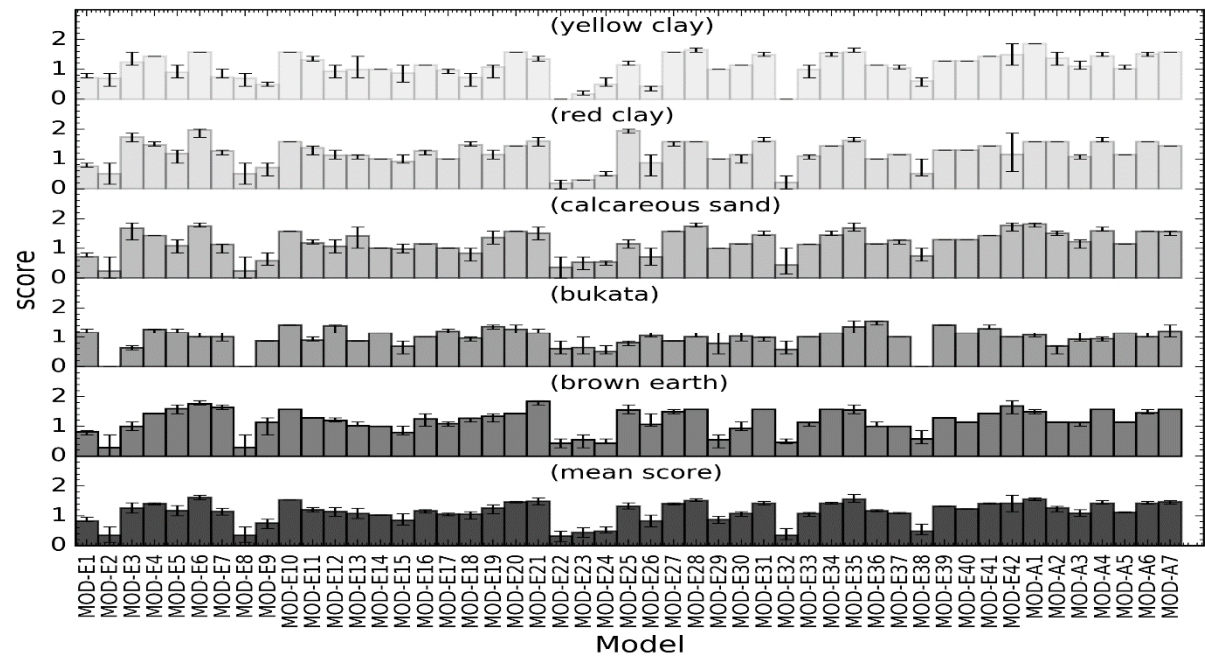

**Figure S11.4.** Total scores for different sediments and the average scores across all five sediments in CLASS-IV water.



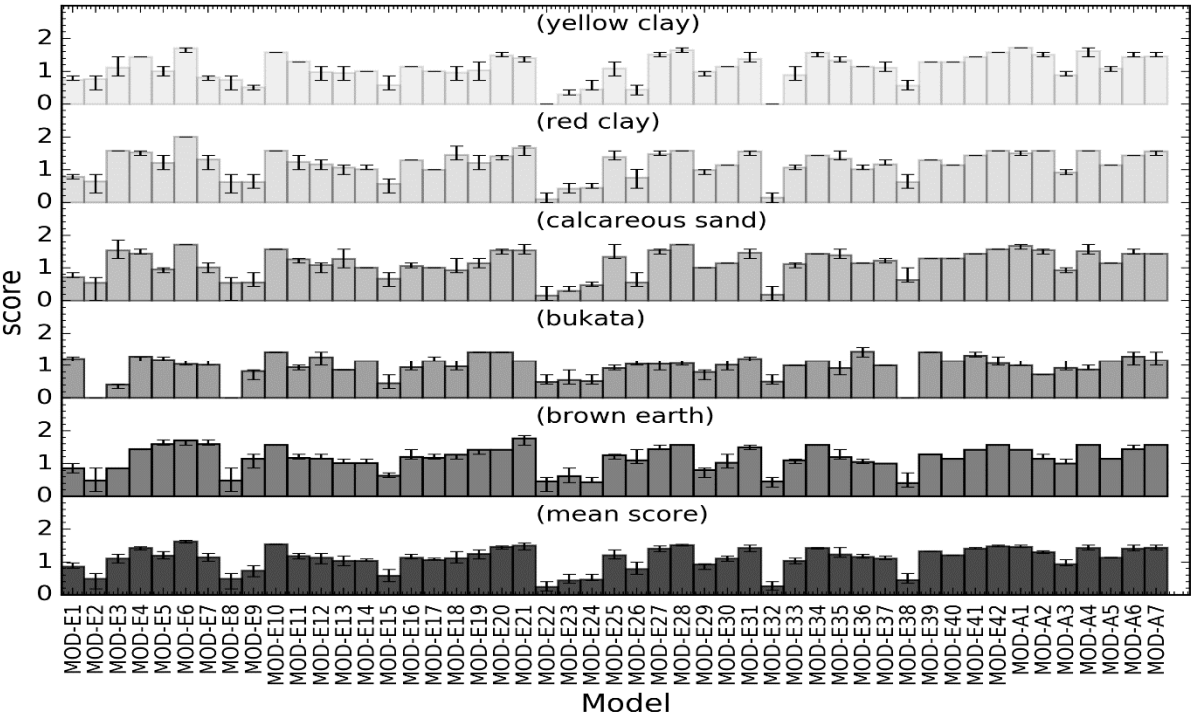

Figure S11.5. Total scores for different sediments and the average scores across all five sediments in CLASS-V water.

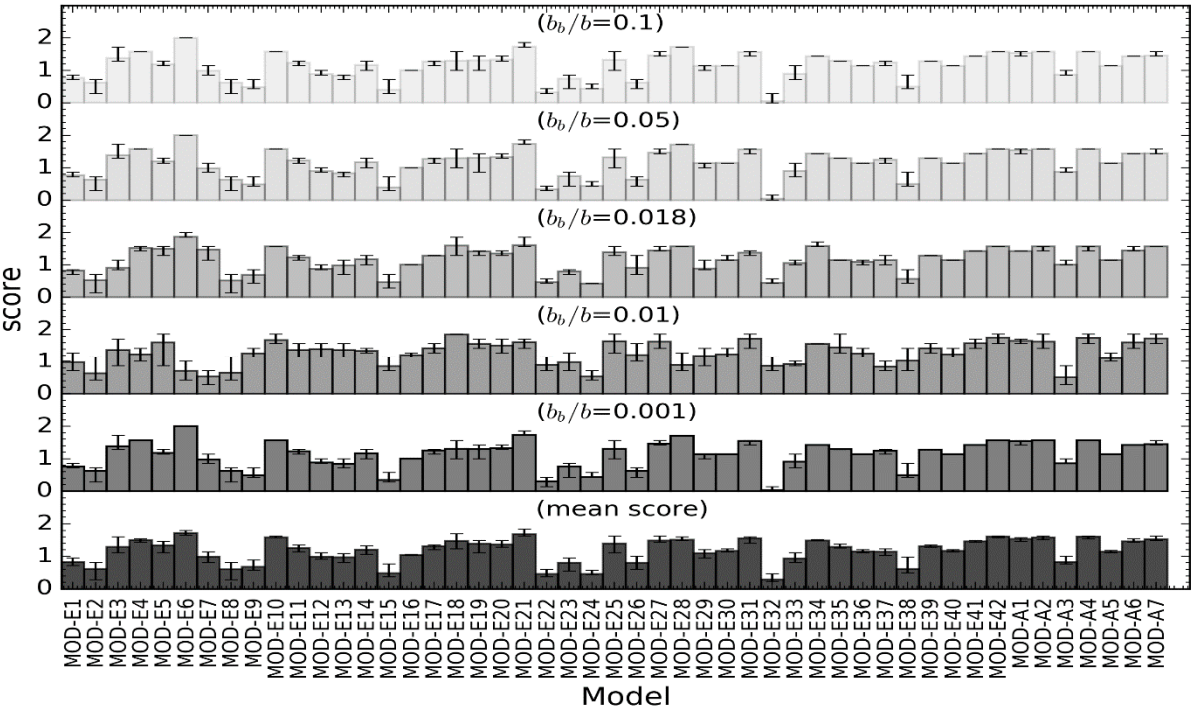

Figure S11.6. Total scores for different backscattering ratios and the average scores across all backscattering ratios in CLASS-I water for Calcareous sand.

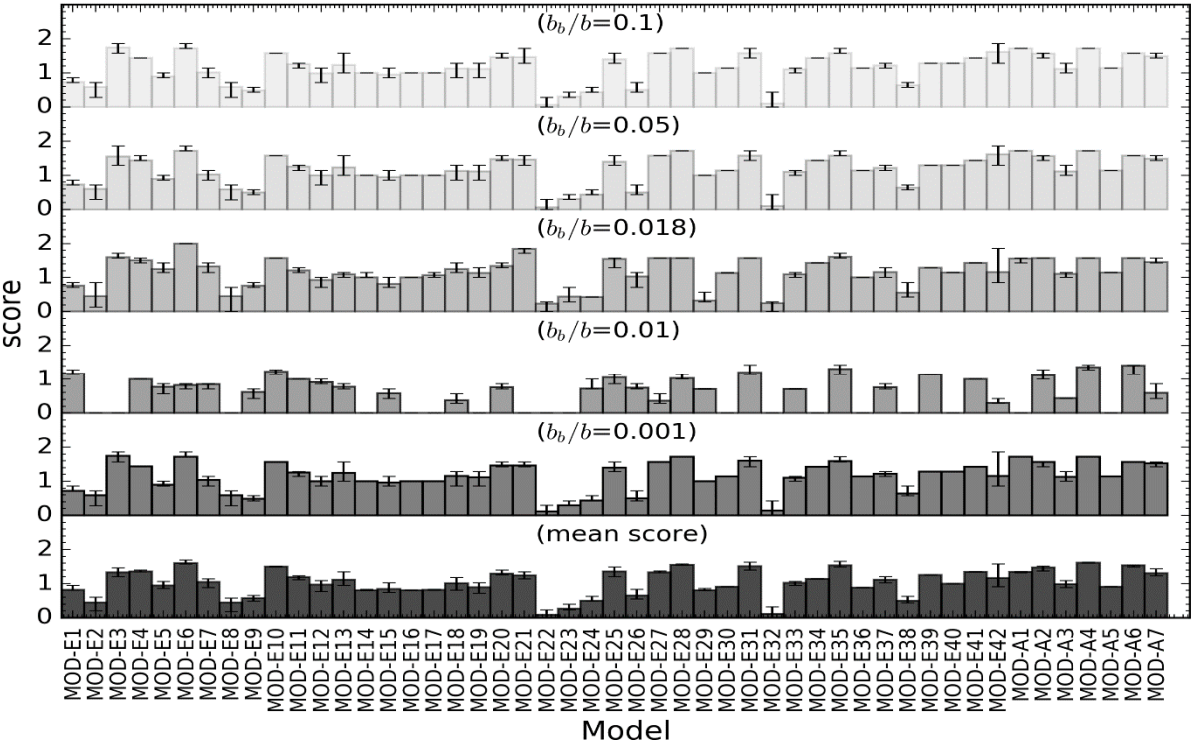

**Figure S11.7.** Total scores for different backscattering ratios and the average scores across all backscattering ratios in CLASS-II water for Calcareous sand.

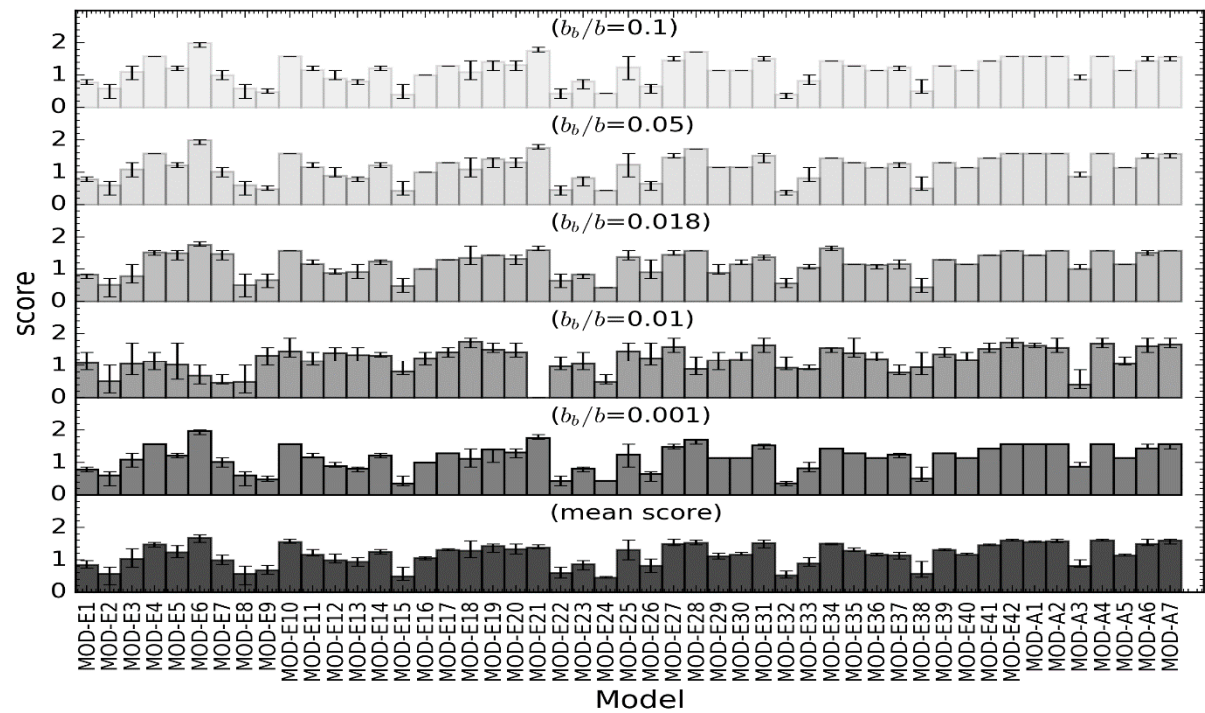

Figure S11.8. Total scores for different backscattering ratios and the average scores across all backscattering ratios in CLASS-III water for Calcareous sand.

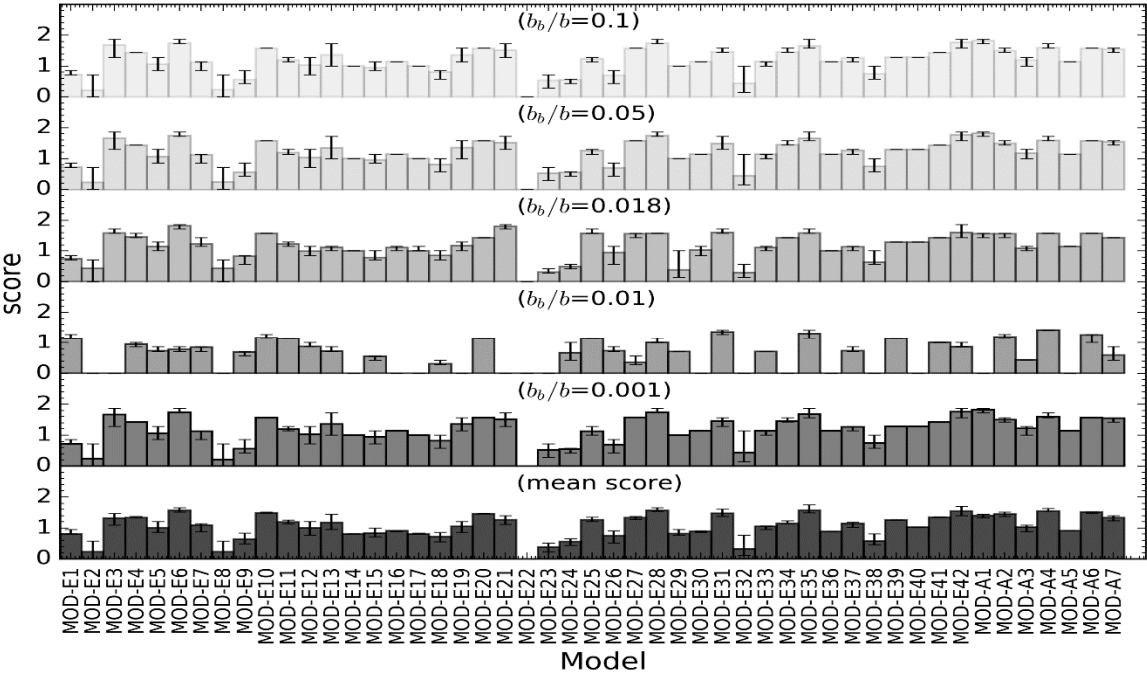

Figure S11.9. Total scores for different backscattering ratios and the average scores across all backscattering ratios in CLASS-IV water for Calcareous sand.

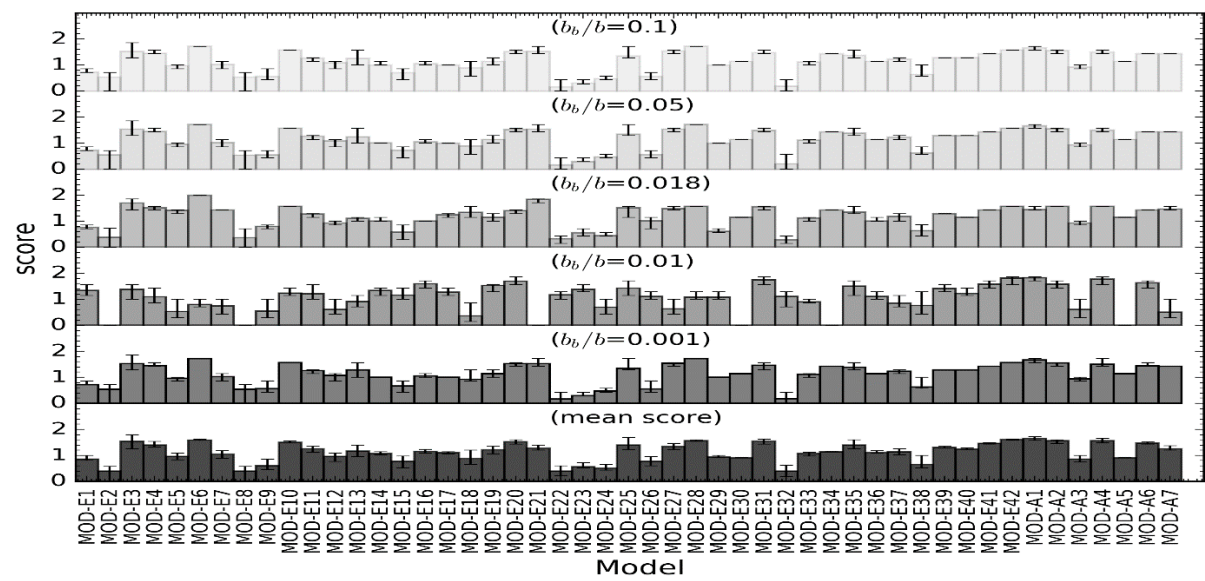

Figure S11.10. Total scores for different backscattering ratios and the average scores across all backscattering ratios in CLASS-V water for Calcareous sand.

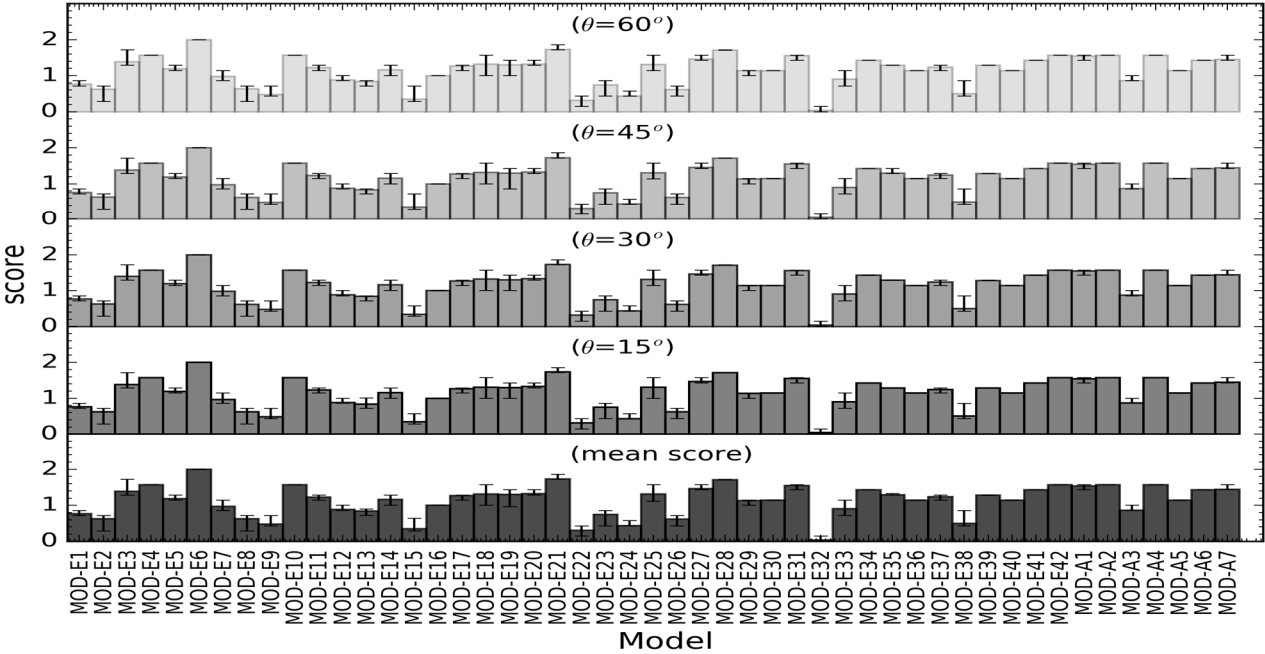

**Figure S11.11.** Total scores for different solar zenith angles and the average scores across all solar zenith angles in CLASS-I water for Calcareous sand.

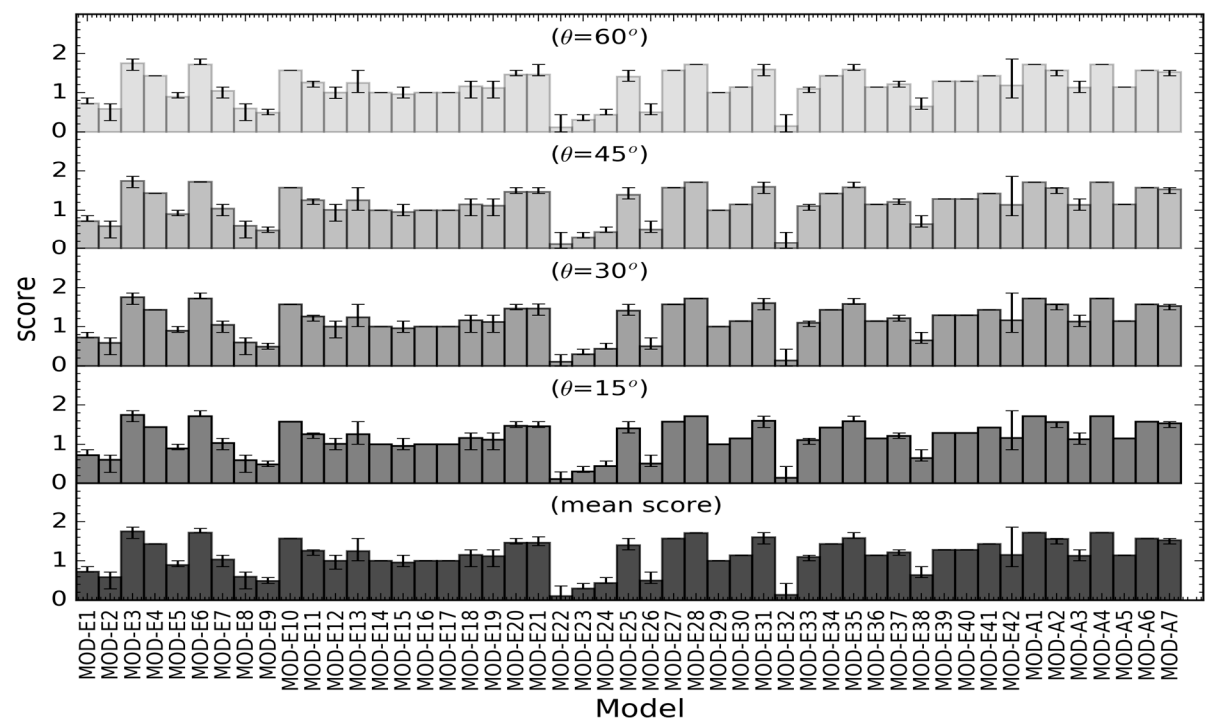

**Figure S11.12.** Total scores for different solar zenith angles and the average scores across all solar zenith angles in CLASS-II water for Calcareous sand.



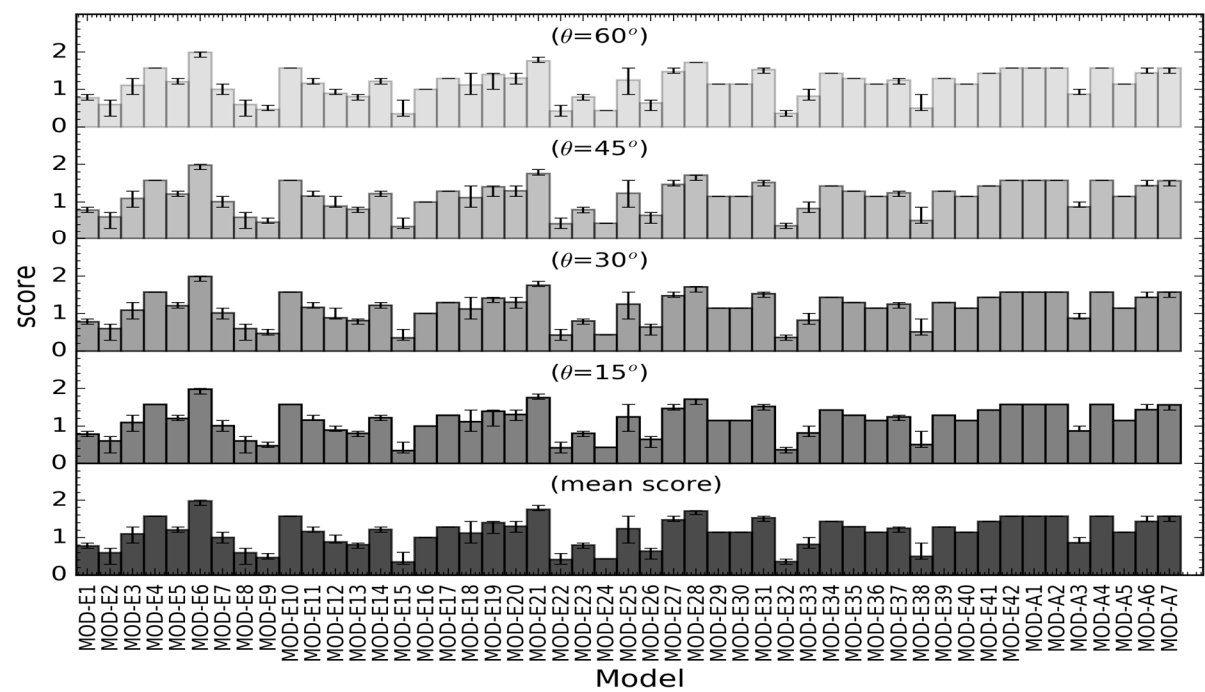

**Figure S11.13.** Total scores for different solar zenith angles and the average scores across all solar zenith angles in CLASS-III water for Calcareous sand.

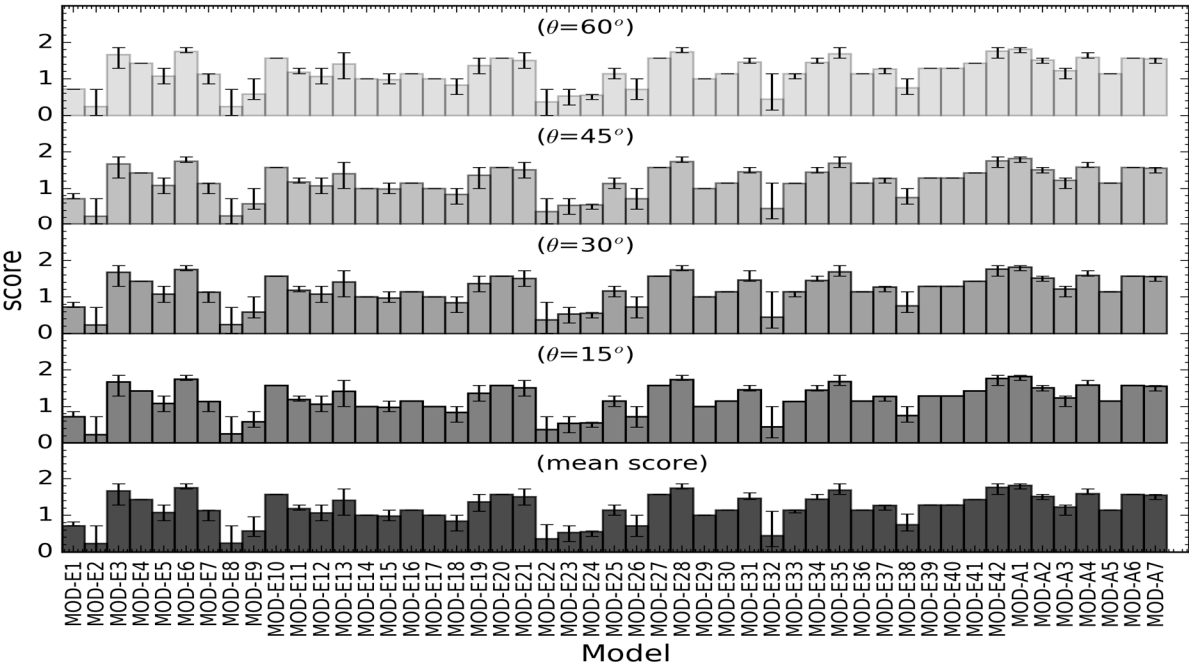

**Figure S11.14.** Total scores for different solar zenith angles and the average scores across all solar zenith angles in CLASS-IV water for Calcareous sand.

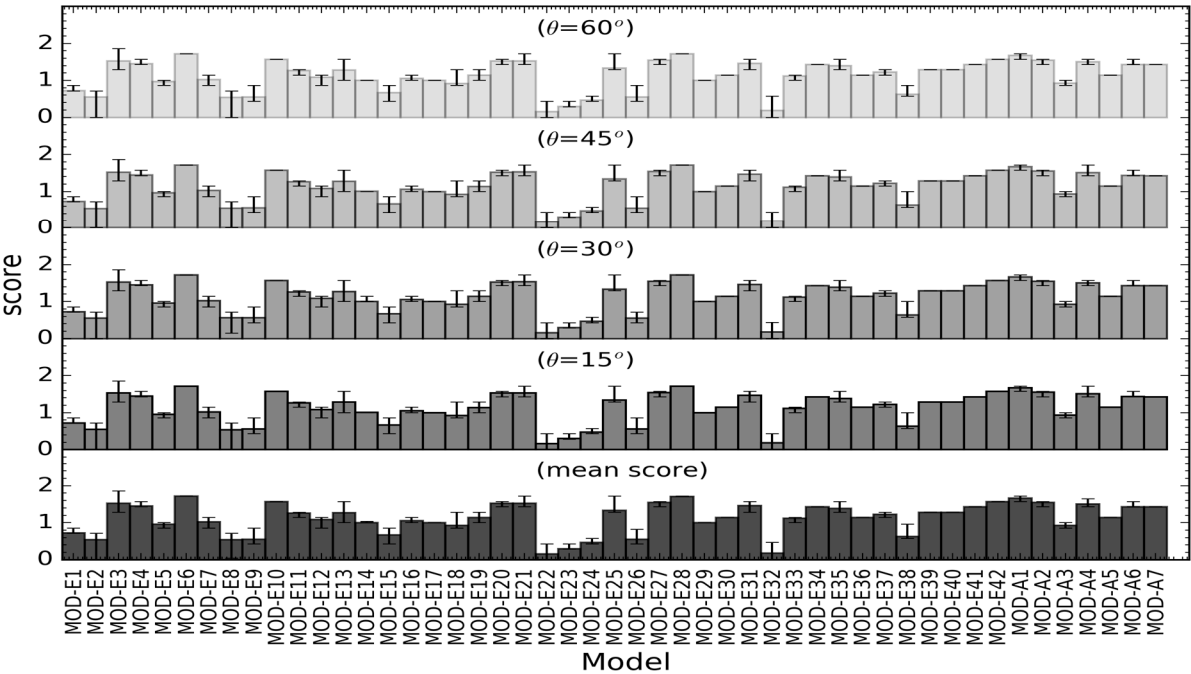

**Figure S11.15** Total scores for different solar zenith angles and the average scores across all solar zenith angles in CLASS-V water for Calcareous sand.

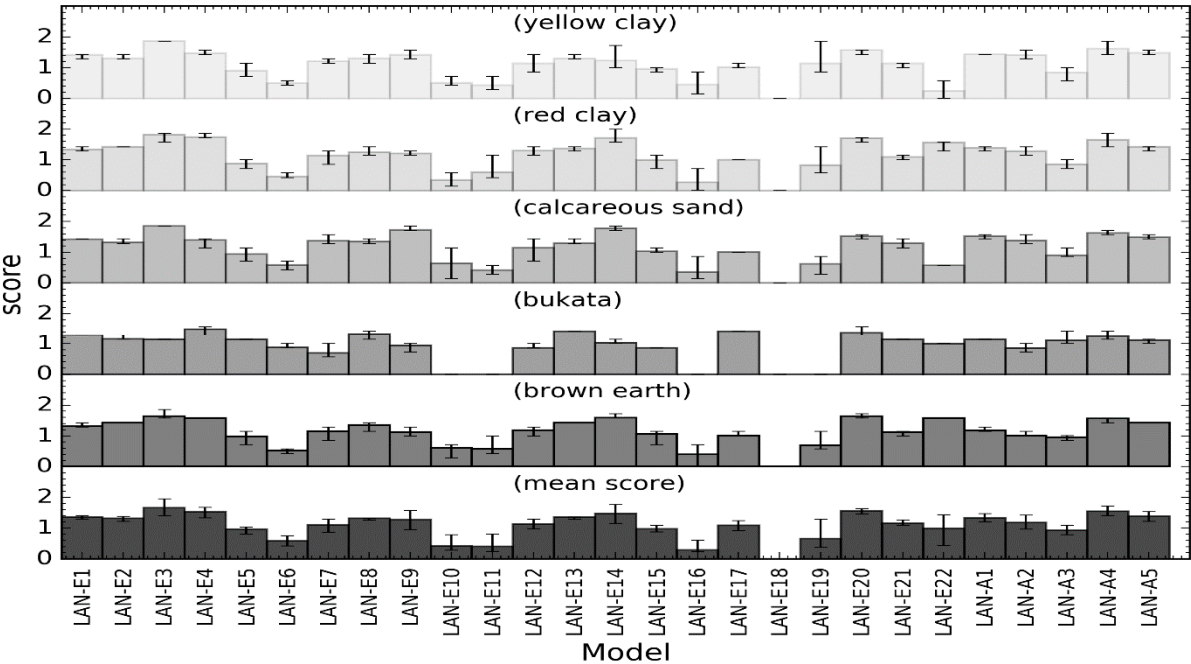

**Figure S11.16.** Total scores for different sediments and the average scores across all five sediments in CLASS-I water.

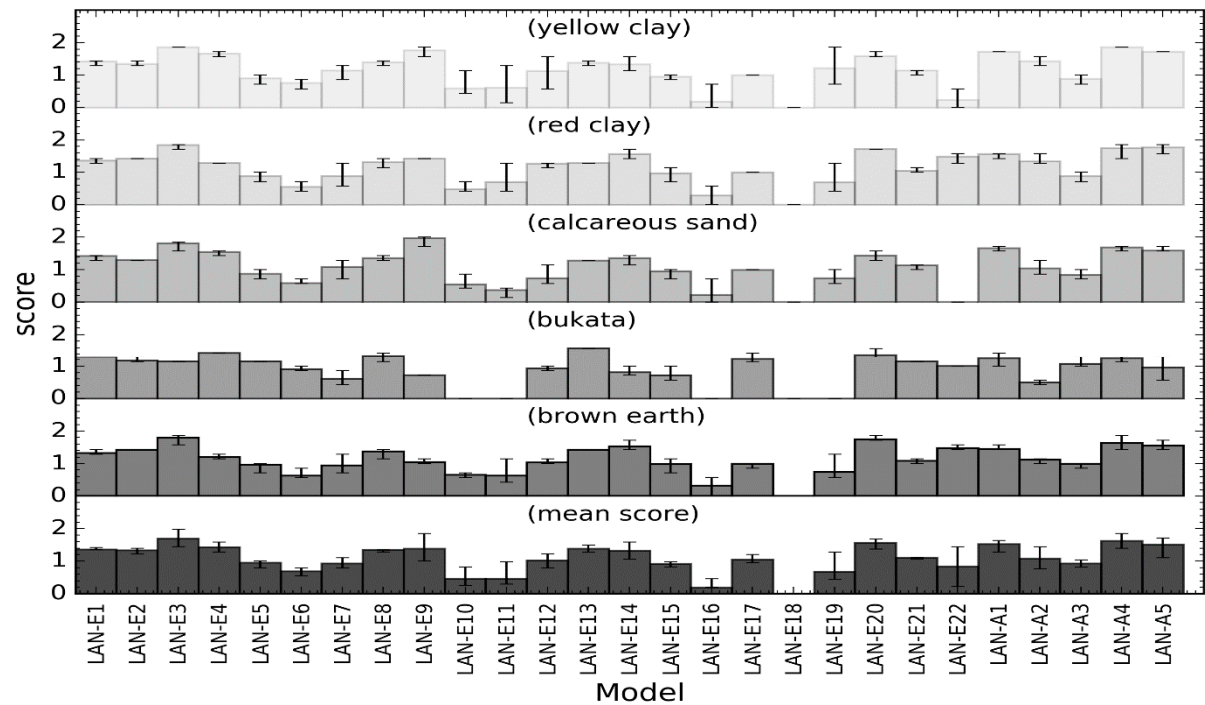

**Figure S11.17.** Total scores for different sediments and the average scores across all five sediments in CLASS-II water.

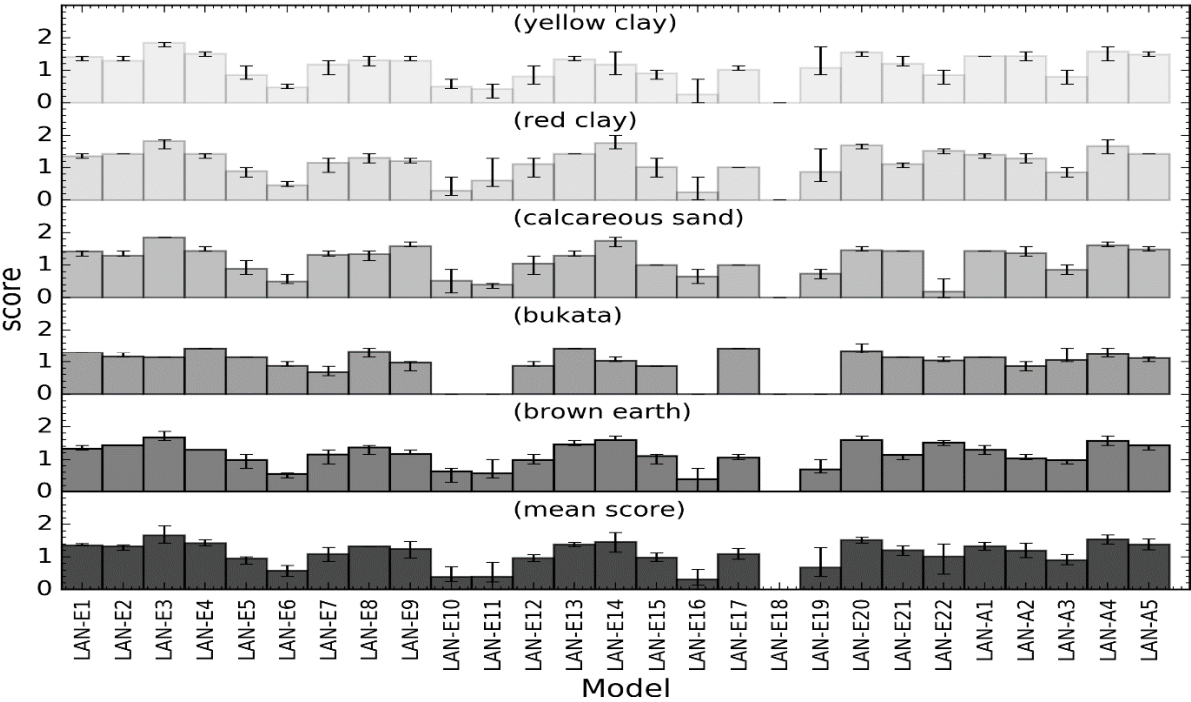

**Figure S11.18.** Total scores for different sediments and the average scores across all five sediments in CLASS-III water.

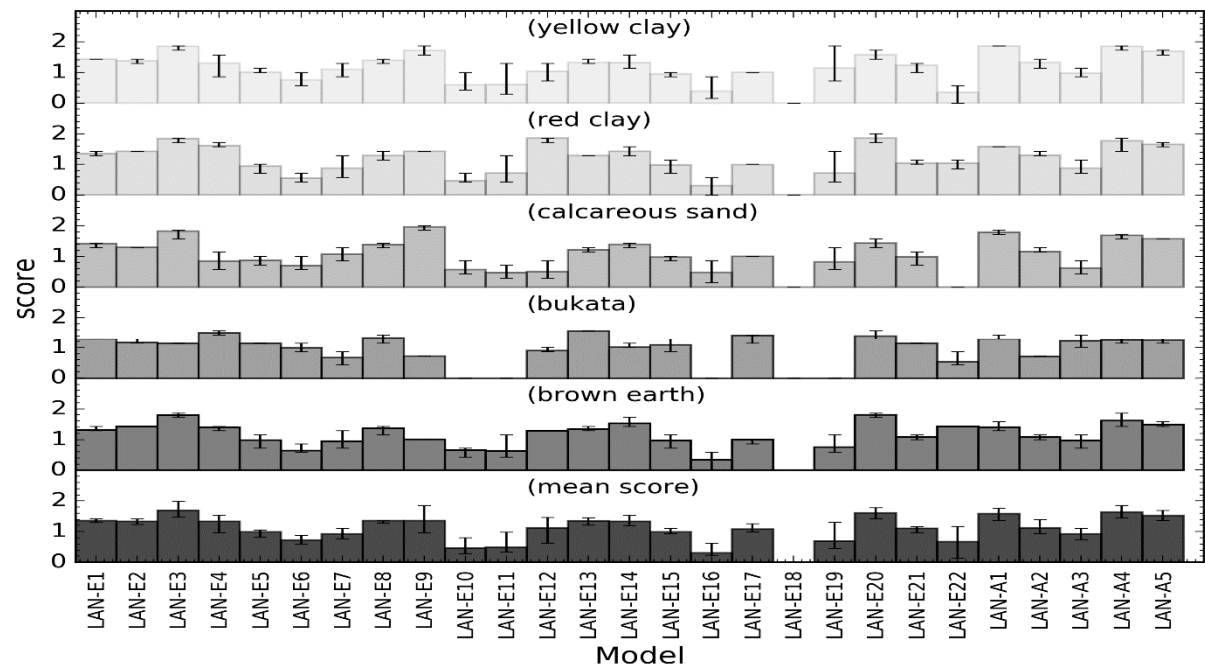

**Figure S11.19.** Total scores for different sediments and the average scores across all five sediments in CLASS-IV water.

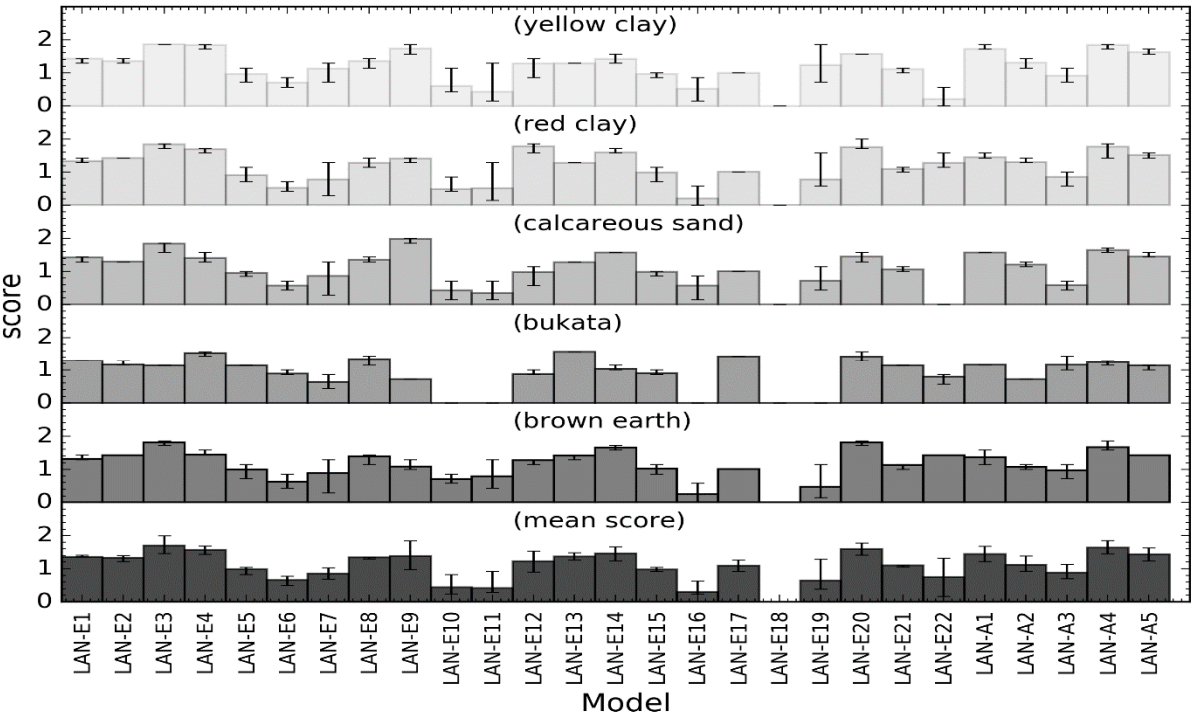

**Figure S11.20.** Total scores for different sediments and the average scores across all five sediments in CLASS-V water.



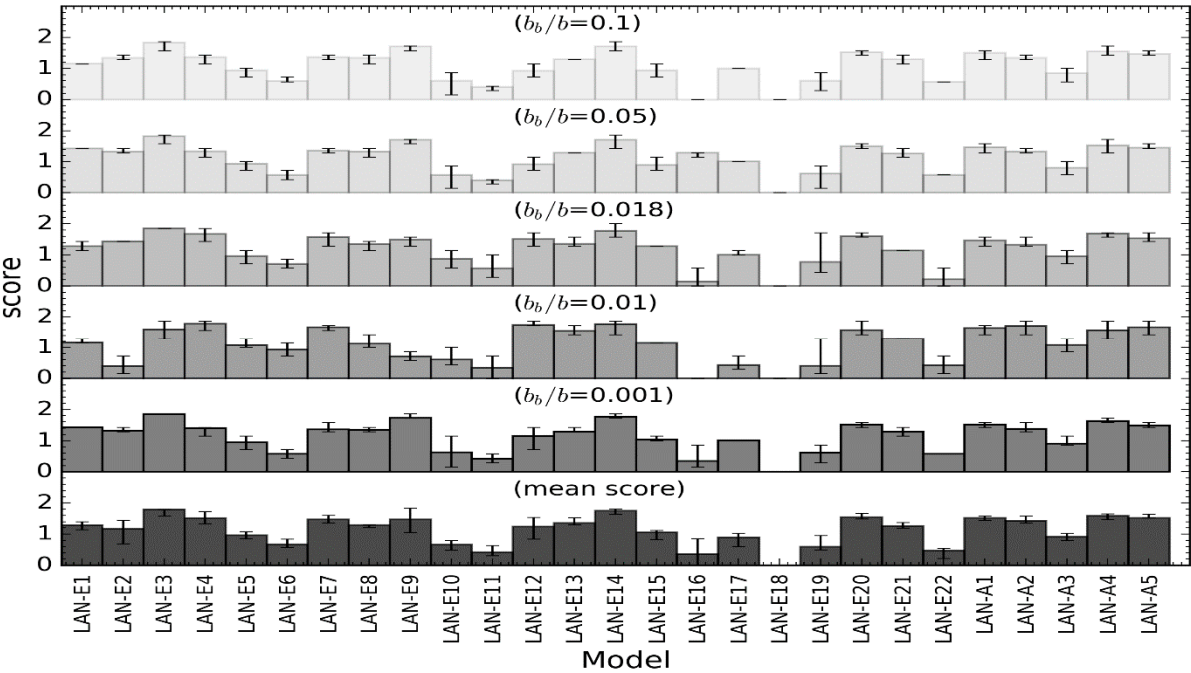

**Figure S11.21.** Total scores for different backscattering ratios and the average scores across all backscattering ratios in CLASS-I water for Calcareous sand.

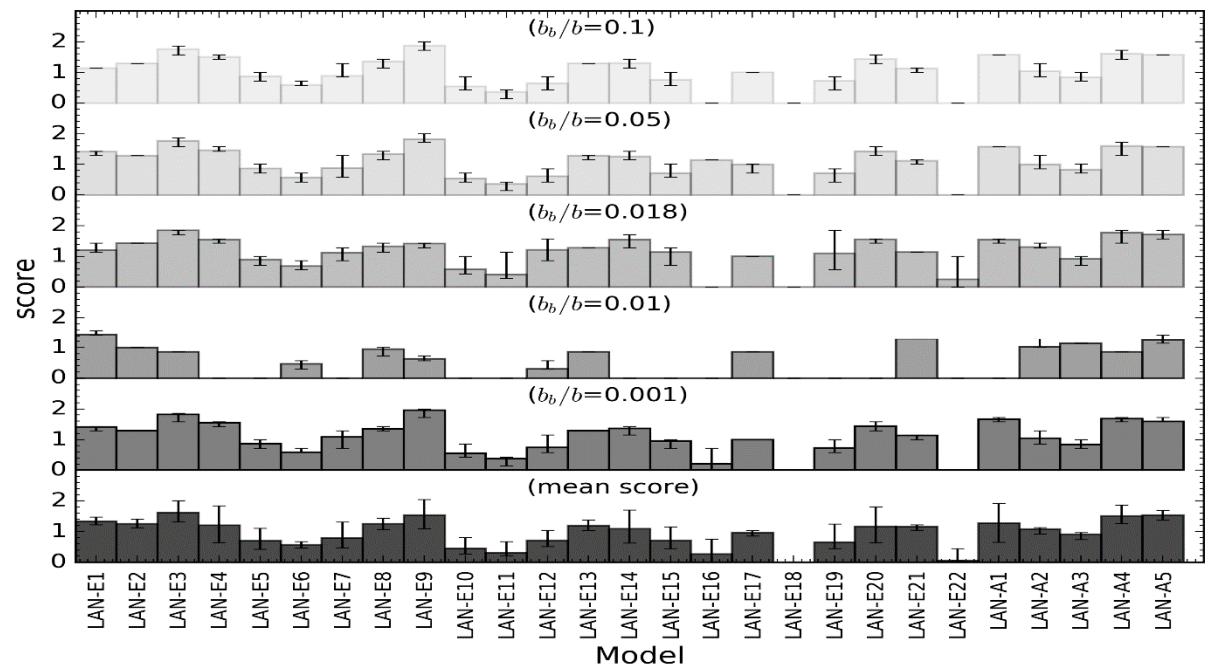

Figure S11.22. Total scores for different backscattering ratios and the average scores across all backscattering ratios in CLASS-II water for Calcareous sand.

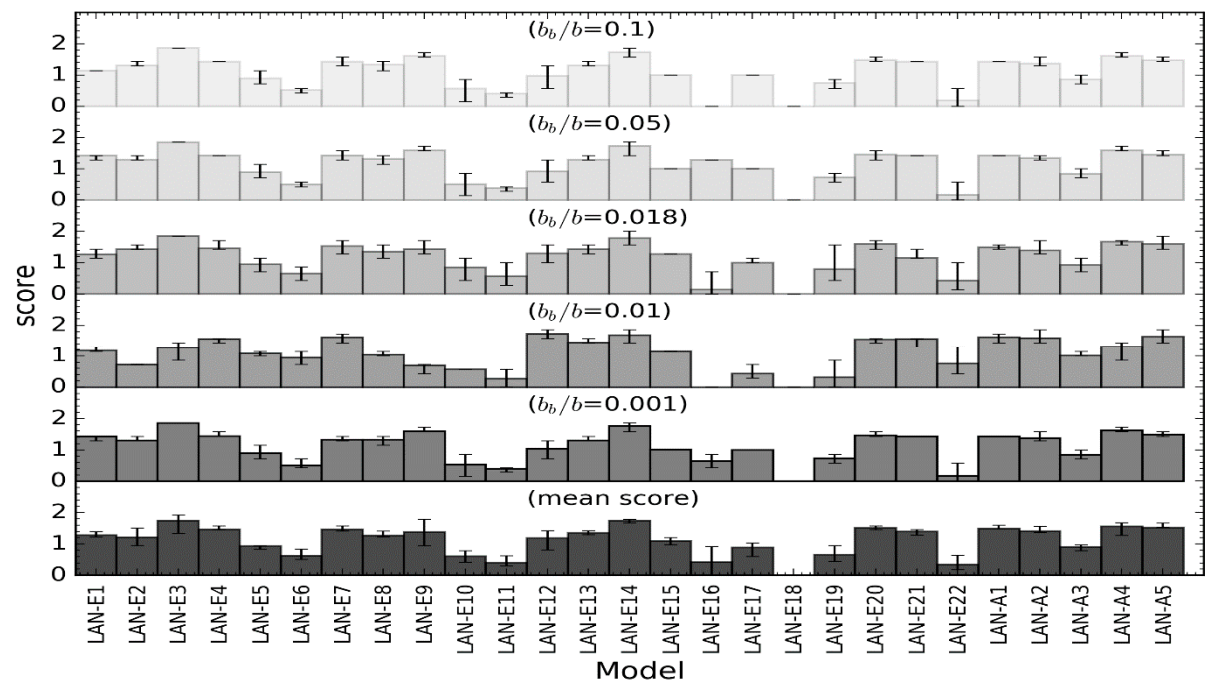

Figure S11.23. Total scores for different backscattering ratios and the average scores across all backscattering ratios in CLASS-III water for Calcareous sand.

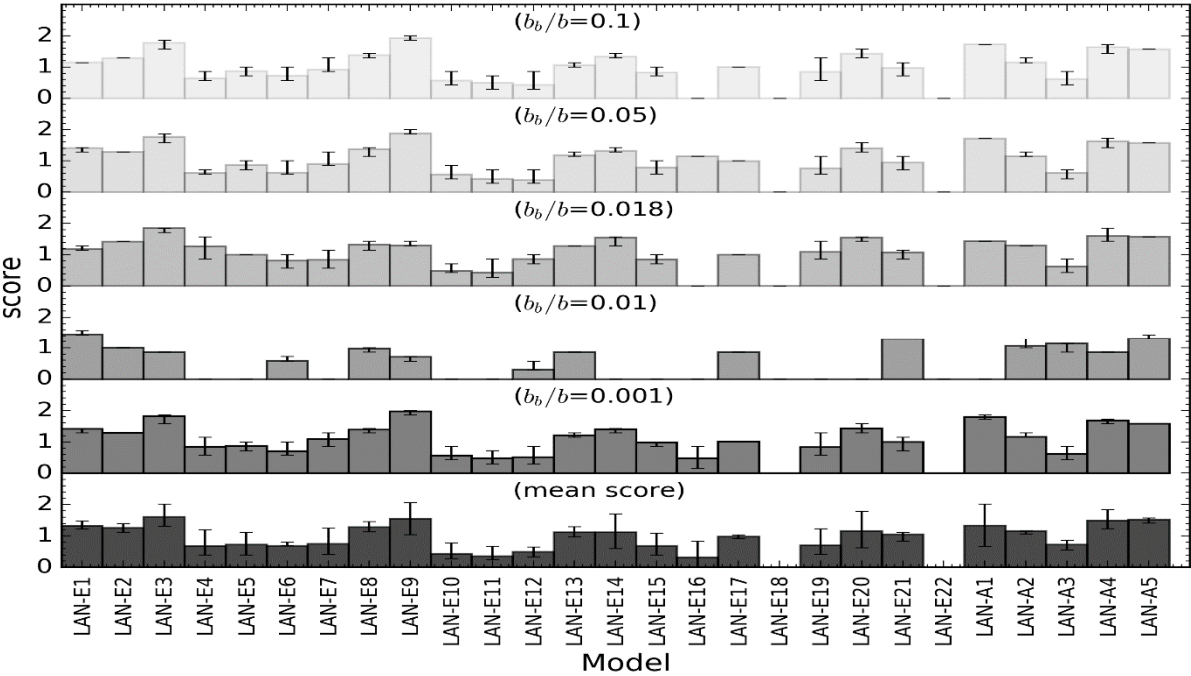

Figure S11.24. Total scores for different backscattering ratios and the average scores across all backscattering ratios in CLASS-IV water for Calcareous sand.

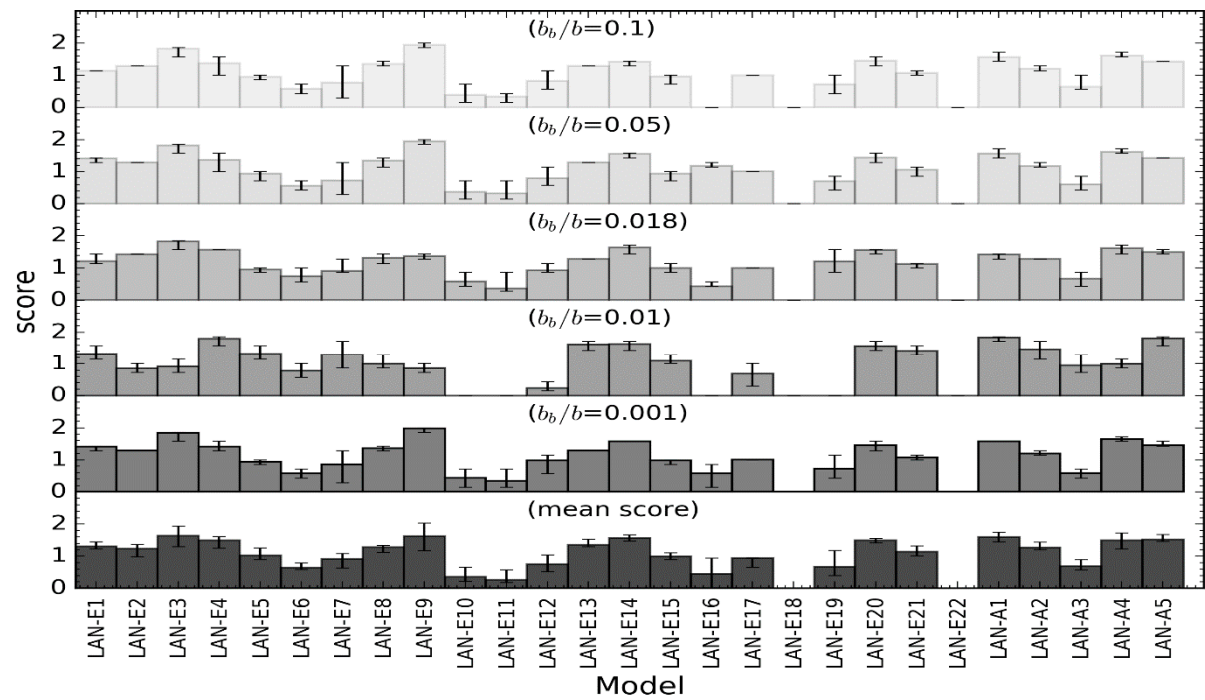

**Figure S11.25.** Total scores for different backscattering ratios and the average scores across all backscattering ratios in CLASS-V water for Calcareous sand.

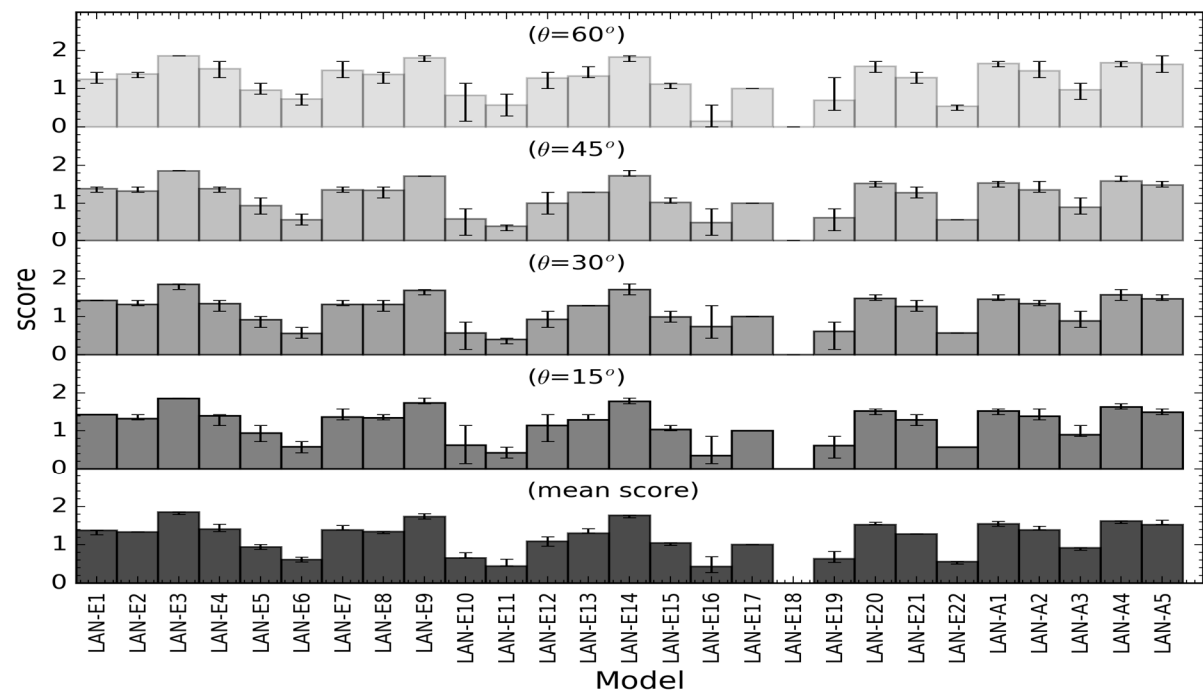

Figure S11.26. Total scores for different solar zenith angles and the average scores across all solar zenith angles in CLASS-I water for Calcareous sand.

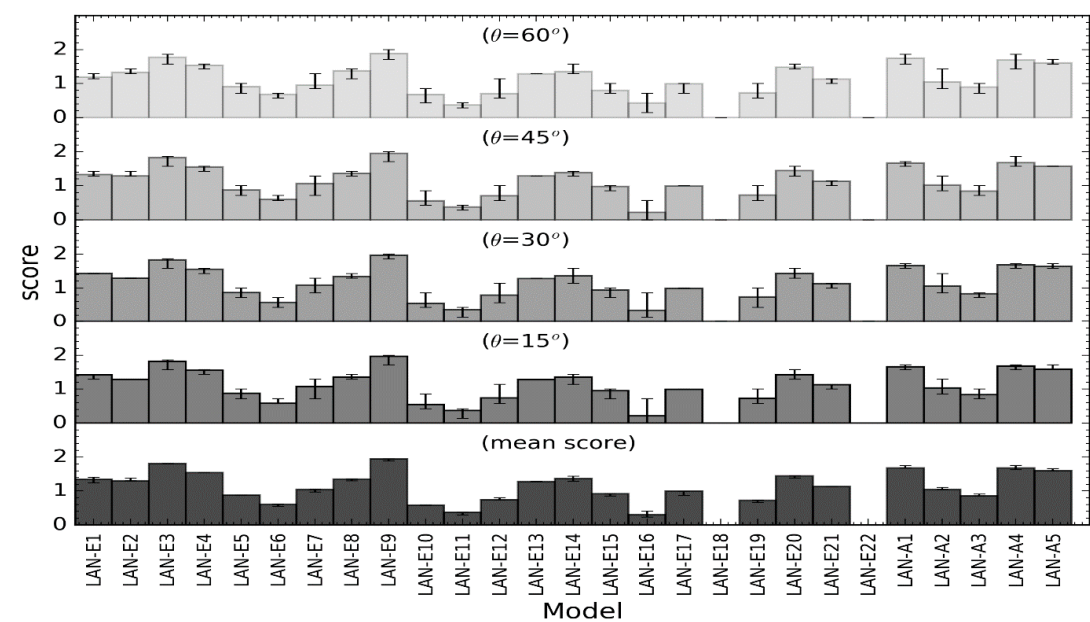

**Figure S11.27.** Total scores for different solar zenith angles and the average scores across all solar zenith angles in CLASS-II water for Calcareous sand.

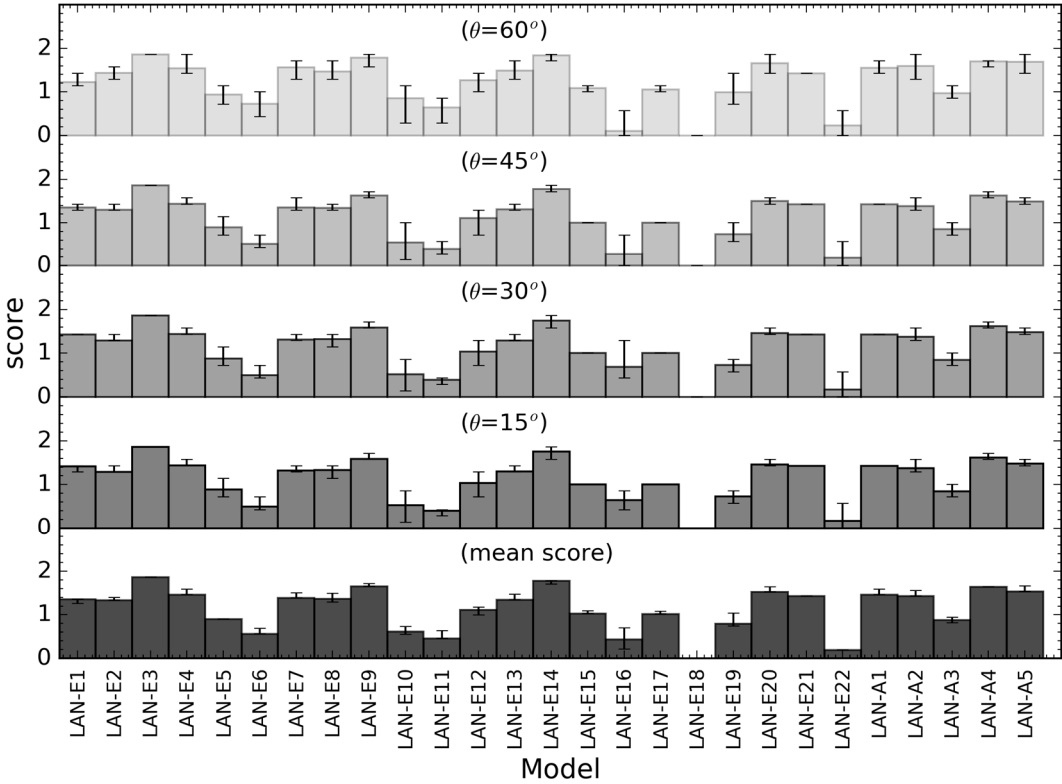

**Figure S11.28.** Total scores for different solar zenith angles and the average scores across all solar zenith angles in CLASS-III water for Calcareous sand.



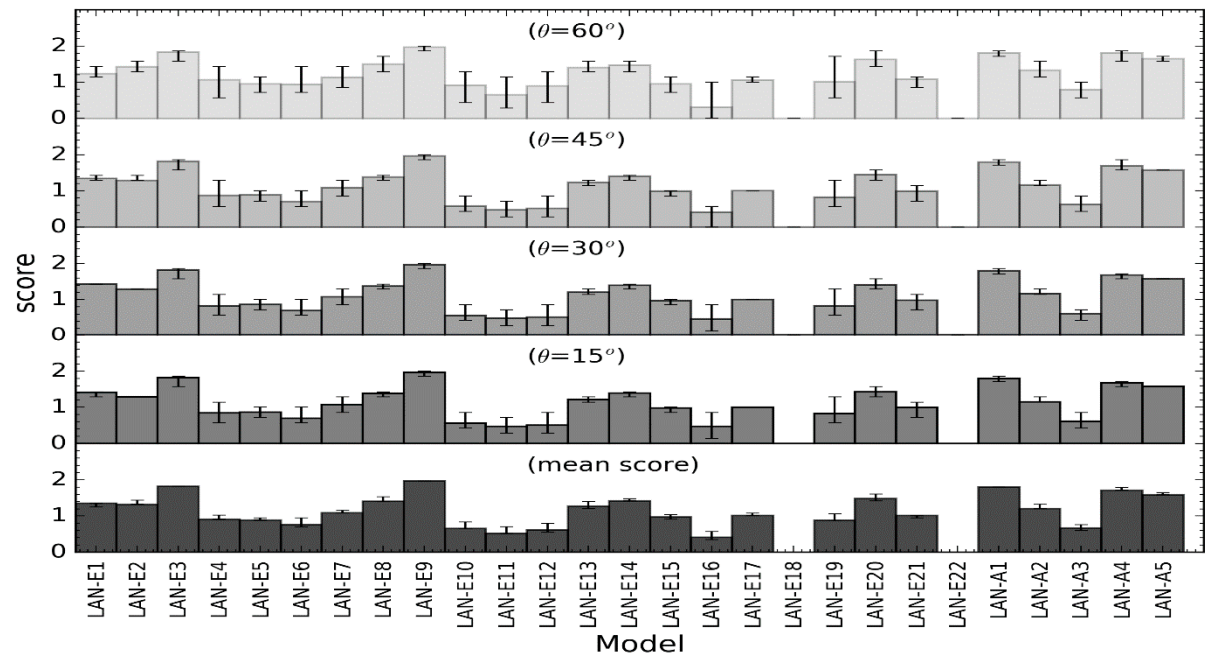

**Figure S11.29.** Total scores for different solar zenith angles and the average scores across all solar zenith angles in CLASS-IV water for Calcareous sand.

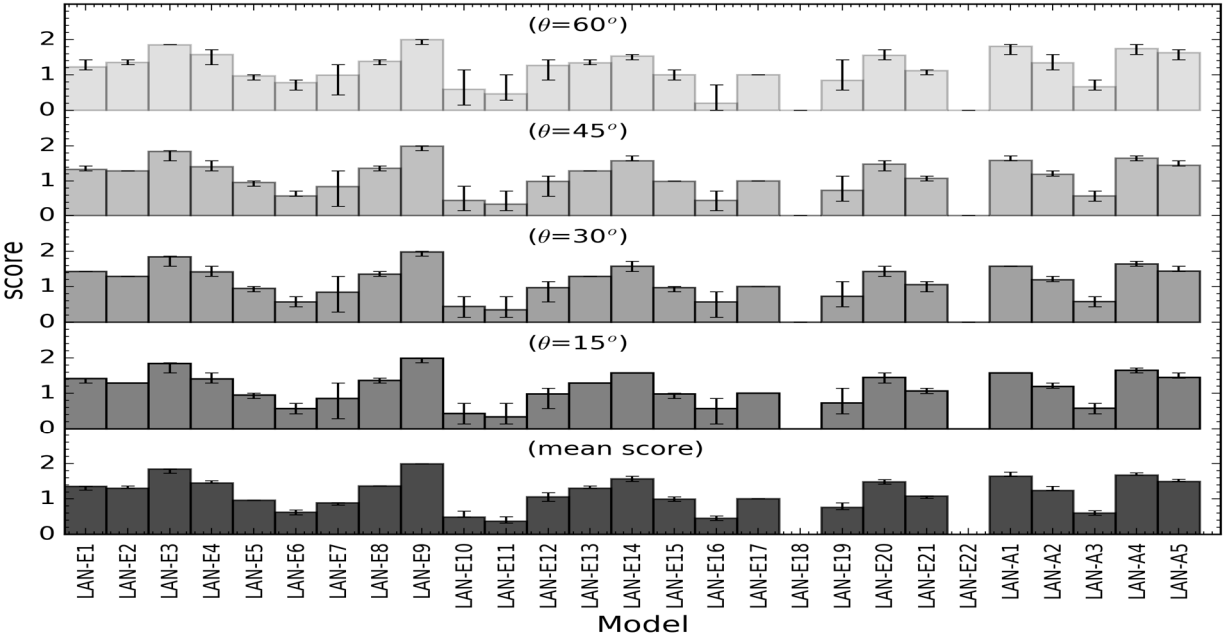

**Figure S11.30.** Total scores for different solar zenith angles and the average scores across all solar zenith angles in CLASS-V water for Calcareous sand.

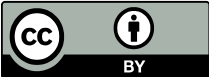

© 2016 by the authors; licensee MDPI, Basel, Switzerland. This article is an open access article distributed under the terms and conditions of the Creative Commons by Attribution (CC-BY) license (<http://creativecommons.org/licenses/by/4.0/>).
